# Supplementary material for: An Innovative Sequence-to-Structure-Based Approach to Drug Resistance Interpretation and Prediction: The Use of Molecular Interaction Fields to Detect HIV-1 Protease Binding-Site Dissimilarities
Source: Front Chem. 2020 Apr 29;8:243. doi: 10.3389/fchem.2020.00243 (PMC7202381; doi:10.3389/fchem.2020.00243)
Supplement: Supplementary file 3 [file Data_Sheet_2.xlsx]

## Sheet: Susceptible_noOut
Sequence_Name	GRADE_APV/FPV_RTV	GRADE_ATV	GRADE_ATV_RTV	GRADE_ATV_SP	GRADE_DRV	GRADE_DRV_QD	GRADE_IDV_RTV	GRADE_LPV	GRADE_NFV	GRADE_SQV_RTV	GRADE_SQV_SP	GRADE_TPV	ANRS_APV/FPV_RTV	ANRS_ATV	ANRS_ATV_RTV	ANRS_ATV_SP	ANRS_DRV	ANRS_DRV_QD	ANRS_IDV_RTV	ANRS_LPV	ANRS_NFV	ANRS_SQV_RTV	ANRS_SQV_SP	ANRS_TPV	HIVDB_APV/FPV_RTV	HIVDB_ATV	HIVDB_ATV_RTV	HIVDB_ATV_SP	HIVDB_DRV	HIVDB_DRV_QD	HIVDB_IDV_RTV	HIVDB_LPV	HIVDB_NFV	HIVDB_SQV_RTV	HIVDB_SQV_SP	HIVDB_TPV	Rega_APV/FPV_RTV	Rega_ATV	Rega_ATV_RTV	Rega_ATV_SP	Rega_DRV	Rega_DRV_QD	Rega_IDV_RTV	Rega_LPV	Rega_NFV	Rega_SQV_RTV	Rega_SQV_SP	Rega_TPV
xaa_1 109157	Susceptible	Susceptible	Susceptible	Susceptible	Susceptible			Susceptible		Susceptible	Susceptible	Susceptible	Susceptible		Susceptible		Susceptible	Susceptible	Susceptible	Susceptible	Susceptible	Susceptible		Susceptible	Susceptible		Susceptible		Susceptible		Susceptible	Susceptible	Susceptible	Susceptible		Susceptible	Susceptible GSS 1.5		Susceptible GSS 1.5		Susceptible GSS 1.5		Susceptible GSS 1.5	Susceptible GSS 1.5	Susceptible GSS 1	Susceptible GSS 1.5		Susceptible GSS 1.5
xaa_2 109390_I62V_K70K	Susceptible	Susceptible	Susceptible	Susceptible	Susceptible			Susceptible		Susceptible	Susceptible	Susceptible	Susceptible		Susceptible		Susceptible	Susceptible	Susceptible	Susceptible	Susceptible	Susceptible		Susceptible	Susceptible		Susceptible		Susceptible		Susceptible	Susceptible	Susceptible	Susceptible		Susceptible	Susceptible GSS 1.5		Susceptible GSS 1.5		Susceptible GSS 1.5		Susceptible GSS 1.5	Susceptible GSS 1.5	Susceptible GSS 1	Susceptible GSS 1.5		Susceptible GSS 1.5
xaa_3 109392_T12K_R41R_N37G	Susceptible	Susceptible	Susceptible	Susceptible	Susceptible			Susceptible		Susceptible	Susceptible	Susceptible	Susceptible		Susceptible		Susceptible	Susceptible	Susceptible	Susceptible	Susceptible	Susceptible		Susceptible	Susceptible		Susceptible		Susceptible		Susceptible	Susceptible	Susceptible	Susceptible		Susceptible	Susceptible GSS 1.5		Susceptible GSS 1.5		Susceptible GSS 1.5		Susceptible GSS 1.5	Susceptible GSS 1.5	Susceptible GSS 1	Susceptible GSS 1.5		Susceptible GSS 1.5
xaa_4 109392_T12T_R41K_N37G	Susceptible	Susceptible	Susceptible	Susceptible	Susceptible			Susceptible		Susceptible	Susceptible	Susceptible	Susceptible		Susceptible		Susceptible	Susceptible	Susceptible	Susceptible	Susceptible	Susceptible		Susceptible	Susceptible		Susceptible		Susceptible		Susceptible	Susceptible	Susceptible	Susceptible		Susceptible	Susceptible GSS 1.5		Susceptible GSS 1.5		Susceptible GSS 1.5		Susceptible GSS 1.5	Susceptible GSS 1.5	Susceptible GSS 1	Susceptible GSS 1.5		Susceptible GSS 1.5
xaa_5 109392_T12T_R41K_N37Y	Susceptible	Susceptible	Susceptible	Susceptible	Susceptible			Susceptible		Susceptible	Susceptible	Susceptible	Susceptible		Susceptible		Susceptible	Susceptible	Susceptible	Susceptible	Susceptible	Susceptible		Susceptible	Susceptible		Susceptible		Susceptible		Susceptible	Susceptible	Susceptible	Susceptible		Susceptible	Susceptible GSS 1.5		Susceptible GSS 1.5		Susceptible GSS 1.5		Susceptible GSS 1.5	Susceptible GSS 1.5	Susceptible GSS 1	Susceptible GSS 1.5		Susceptible GSS 1.5
xaa_6 109392_T12T_R41R_N37A	Susceptible	Susceptible	Susceptible	Susceptible	Susceptible			Susceptible		Susceptible	Susceptible	Susceptible	Susceptible		Susceptible		Susceptible	Susceptible	Susceptible	Susceptible	Susceptible	Susceptible		Susceptible	Susceptible		Susceptible		Susceptible		Susceptible	Susceptible	Susceptible	Susceptible		Susceptible	Susceptible GSS 1.5		Susceptible GSS 1.5		Susceptible GSS 1.5		Susceptible GSS 1.5	Susceptible GSS 1.5	Susceptible GSS 1	Susceptible GSS 1.5		Susceptible GSS 1.5
xaa_7 109392_T12T_R41R_N37C	Susceptible	Susceptible	Susceptible	Susceptible	Susceptible			Susceptible		Susceptible	Susceptible	Susceptible	Susceptible		Susceptible		Susceptible	Susceptible	Susceptible	Susceptible	Susceptible	Susceptible		Susceptible	Susceptible		Susceptible		Susceptible		Susceptible	Susceptible	Susceptible	Susceptible		Susceptible	Susceptible GSS 1.5		Susceptible GSS 1.5		Susceptible GSS 1.5		Susceptible GSS 1.5	Susceptible GSS 1.5	Susceptible GSS 1	Susceptible GSS 1.5		Susceptible GSS 1.5
xaa_8 109392_T12T_R41R_N37D	Susceptible	Susceptible	Susceptible	Susceptible	Susceptible			Susceptible		Susceptible	Susceptible	Susceptible	Susceptible		Susceptible		Susceptible	Susceptible	Susceptible	Susceptible	Susceptible	Susceptible		Susceptible	Susceptible		Susceptible		Susceptible		Susceptible	Susceptible	Susceptible	Susceptible		Susceptible	Susceptible GSS 1.5		Susceptible GSS 1.5		Susceptible GSS 1.5		Susceptible GSS 1.5	Susceptible GSS 1.5	Susceptible GSS 1	Susceptible GSS 1.5		Susceptible GSS 1.5
xaa_9 109392_T12T_R41R_N37E	Susceptible	Susceptible	Susceptible	Susceptible	Susceptible			Susceptible		Susceptible	Susceptible	Susceptible	Susceptible		Susceptible		Susceptible	Susceptible	Susceptible	Susceptible	Susceptible	Susceptible		Susceptible	Susceptible		Susceptible		Susceptible		Susceptible	Susceptible	Susceptible	Susceptible		Susceptible	Susceptible GSS 1.5		Susceptible GSS 1.5		Susceptible GSS 1.5		Susceptible GSS 1.5	Susceptible GSS 1.5	Susceptible GSS 1	Susceptible GSS 1.5		Susceptible GSS 1.5
xaa_10 109392_T12T_R41R_N37F	Susceptible	Susceptible	Susceptible	Susceptible	Susceptible			Susceptible		Susceptible	Susceptible	Susceptible	Susceptible		Susceptible		Susceptible	Susceptible	Susceptible	Susceptible	Susceptible	Susceptible		Susceptible	Susceptible		Susceptible		Susceptible		Susceptible	Susceptible	Susceptible	Susceptible		Susceptible	Susceptible GSS 1.5		Susceptible GSS 1.5		Susceptible GSS 1.5		Susceptible GSS 1.5	Susceptible GSS 1.5	Susceptible GSS 1	Susceptible GSS 1.5		Susceptible GSS 1.5
xaa_11 109392_T12T_R41R_N37G	Susceptible	Susceptible	Susceptible	Susceptible	Susceptible			Susceptible		Susceptible	Susceptible	Susceptible	Susceptible		Susceptible		Susceptible	Susceptible	Susceptible	Susceptible	Susceptible	Susceptible		Susceptible	Susceptible		Susceptible		Susceptible		Susceptible	Susceptible	Susceptible	Susceptible		Susceptible	Susceptible GSS 1.5		Susceptible GSS 1.5		Susceptible GSS 1.5		Susceptible GSS 1.5	Susceptible GSS 1.5	Susceptible GSS 1	Susceptible GSS 1.5		Susceptible GSS 1.5
xaa_12 109392_T12T_R41R_N37H	Susceptible	Susceptible	Susceptible	Susceptible	Susceptible			Susceptible		Susceptible	Susceptible	Susceptible	Susceptible		Susceptible		Susceptible	Susceptible	Susceptible	Susceptible	Susceptible	Susceptible		Susceptible	Susceptible		Susceptible		Susceptible		Susceptible	Susceptible	Susceptible	Susceptible		Susceptible	Susceptible GSS 1.5		Susceptible GSS 1.5		Susceptible GSS 1.5		Susceptible GSS 1.5	Susceptible GSS 1.5	Susceptible GSS 1	Susceptible GSS 1.5		Susceptible GSS 1.5
xaa_13 109392_T12T_R41R_N37K	Susceptible	Susceptible	Susceptible	Susceptible	Susceptible			Susceptible		Susceptible	Susceptible	Susceptible	Susceptible		Susceptible		Susceptible	Susceptible	Susceptible	Susceptible	Susceptible	Susceptible		Susceptible	Susceptible		Susceptible		Susceptible		Susceptible	Susceptible	Susceptible	Susceptible		Susceptible	Susceptible GSS 1.5		Susceptible GSS 1.5		Susceptible GSS 1.5		Susceptible GSS 1.5	Susceptible GSS 1.5	Susceptible GSS 1	Susceptible GSS 1.5		Susceptible GSS 1.5
xaa_14 109392_T12T_R41R_N37L	Susceptible	Susceptible	Susceptible	Susceptible	Susceptible			Susceptible		Susceptible	Susceptible	Susceptible	Susceptible		Susceptible		Susceptible	Susceptible	Susceptible	Susceptible	Susceptible	Susceptible		Susceptible	Susceptible		Susceptible		Susceptible		Susceptible	Susceptible	Susceptible	Susceptible		Susceptible	Susceptible GSS 1.5		Susceptible GSS 1.5		Susceptible GSS 1.5		Susceptible GSS 1.5	Susceptible GSS 1.5	Susceptible GSS 1	Susceptible GSS 1.5		Susceptible GSS 1.5
xaa_15 109392_T12T_R41R_N37N	Susceptible	Susceptible	Susceptible	Susceptible	Susceptible			Susceptible		Susceptible	Susceptible	Susceptible	Susceptible		Susceptible		Susceptible	Susceptible	Susceptible	Susceptible	Susceptible	Susceptible		Susceptible	Susceptible		Susceptible		Susceptible		Susceptible	Susceptible	Susceptible	Susceptible		Susceptible	Susceptible GSS 1.5		Susceptible GSS 1.5		Susceptible GSS 1.5		Susceptible GSS 1.5	Susceptible GSS 1.5	Susceptible GSS 1	Susceptible GSS 1.5		Susceptible GSS 1.5
xaa_16 109392_T12T_R41R_N37Q	Susceptible	Susceptible	Susceptible	Susceptible	Susceptible			Susceptible		Susceptible	Susceptible	Susceptible	Susceptible		Susceptible		Susceptible	Susceptible	Susceptible	Susceptible	Susceptible	Susceptible		Susceptible	Susceptible		Susceptible		Susceptible		Susceptible	Susceptible	Susceptible	Susceptible		Susceptible	Susceptible GSS 1.5		Susceptible GSS 1.5		Susceptible GSS 1.5		Susceptible GSS 1.5	Susceptible GSS 1.5	Susceptible GSS 1	Susceptible GSS 1.5		Susceptible GSS 1.5
xaa_17 109392_T12T_R41R_N37R	Susceptible	Susceptible	Susceptible	Susceptible	Susceptible			Susceptible		Susceptible	Susceptible	Susceptible	Susceptible		Susceptible		Susceptible	Susceptible	Susceptible	Susceptible	Susceptible	Susceptible		Susceptible	Susceptible		Susceptible		Susceptible		Susceptible	Susceptible	Susceptible	Susceptible		Susceptible	Susceptible GSS 1.5		Susceptible GSS 1.5		Susceptible GSS 1.5		Susceptible GSS 1.5	Susceptible GSS 1.5	Susceptible GSS 1	Susceptible GSS 1.5		Susceptible GSS 1.5
xaa_18 109392_T12T_R41R_N37S	Susceptible	Susceptible	Susceptible	Susceptible	Susceptible			Susceptible		Susceptible	Susceptible	Susceptible	Susceptible		Susceptible		Susceptible	Susceptible	Susceptible	Susceptible	Susceptible	Susceptible		Susceptible	Susceptible		Susceptible		Susceptible		Susceptible	Susceptible	Susceptible	Susceptible		Susceptible	Susceptible GSS 1.5		Susceptible GSS 1.5		Susceptible GSS 1.5		Susceptible GSS 1.5	Susceptible GSS 1.5	Susceptible GSS 1	Susceptible GSS 1.5		Susceptible GSS 1.5
xaa_19 109392_T12T_R41R_N37T	Susceptible	Susceptible	Susceptible	Susceptible	Susceptible			Susceptible		Susceptible	Susceptible	Susceptible	Susceptible		Susceptible		Susceptible	Susceptible	Susceptible	Susceptible	Susceptible	Susceptible		Susceptible	Susceptible		Susceptible		Susceptible		Susceptible	Susceptible	Susceptible	Susceptible		Susceptible	Susceptible GSS 1.5		Susceptible GSS 1.5		Susceptible GSS 1.5		Susceptible GSS 1.5	Susceptible GSS 1.5	Susceptible GSS 1	Susceptible GSS 1.5		Susceptible GSS 1.5
xaa_20 109392_T12T_R41R_N37V	Susceptible	Susceptible	Susceptible	Susceptible	Susceptible			Susceptible		Susceptible	Susceptible	Susceptible	Susceptible		Susceptible		Susceptible	Susceptible	Susceptible	Susceptible	Susceptible	Susceptible		Susceptible	Susceptible		Susceptible		Susceptible		Susceptible	Susceptible	Susceptible	Susceptible		Susceptible	Susceptible GSS 1.5		Susceptible GSS 1.5		Susceptible GSS 1.5		Susceptible GSS 1.5	Susceptible GSS 1.5	Susceptible GSS 1	Susceptible GSS 1.5		Susceptible GSS 1.5
xaa_21 109392_T12T_R41R_N37W	Susceptible	Susceptible	Susceptible	Susceptible	Susceptible			Susceptible		Susceptible	Susceptible	Susceptible	Susceptible		Susceptible		Susceptible	Susceptible	Susceptible	Susceptible	Susceptible	Susceptible		Susceptible	Susceptible		Susceptible		Susceptible		Susceptible	Susceptible	Susceptible	Susceptible		Susceptible	Susceptible GSS 1.5		Susceptible GSS 1.5		Susceptible GSS 1.5		Susceptible GSS 1.5	Susceptible GSS 1.5	Susceptible GSS 1	Susceptible GSS 1.5		Susceptible GSS 1.5
xaa_22 109392_T12T_R41R_N37Y	Susceptible	Susceptible	Susceptible	Susceptible	Susceptible			Susceptible		Susceptible	Susceptible	Susceptible	Susceptible		Susceptible		Susceptible	Susceptible	Susceptible	Susceptible	Susceptible	Susceptible		Susceptible	Susceptible		Susceptible		Susceptible		Susceptible	Susceptible	Susceptible	Susceptible		Susceptible	Susceptible GSS 1.5		Susceptible GSS 1.5		Susceptible GSS 1.5		Susceptible GSS 1.5	Susceptible GSS 1.5	Susceptible GSS 1	Susceptible GSS 1.5		Susceptible GSS 1.5
xaa_23 109396	Susceptible	Susceptible	Susceptible	Susceptible	Susceptible			Susceptible		Susceptible	Susceptible	Susceptible	Susceptible		Susceptible		Susceptible	Susceptible	Susceptible	Susceptible	Susceptible	Susceptible		Susceptible	Susceptible		Susceptible		Susceptible		Susceptible	Susceptible	Susceptible	Susceptible		Susceptible	Susceptible GSS 1.5		Susceptible GSS 1.5		Susceptible GSS 1.5		Susceptible GSS 1.5	Susceptible GSS 1.5	Susceptible GSS 1	Susceptible GSS 1.5		Susceptible GSS 1.5
xaa_24 109402_L33L_P39P_H69H	Susceptible	Susceptible	Susceptible	Susceptible	Susceptible			Susceptible		Susceptible	Susceptible	Susceptible	Susceptible		Susceptible		Susceptible	Susceptible	Susceptible	Susceptible	Susceptible	Susceptible		Susceptible	Susceptible		Susceptible		Susceptible		Susceptible	Susceptible	Susceptible	Susceptible		Susceptible	Susceptible GSS 1.5		Susceptible GSS 1.5		Susceptible GSS 1.5		Susceptible GSS 1.5	Susceptible GSS 1.5	Susceptible GSS 1	Susceptible GSS 1.5		Susceptible GSS 1.5
xaa_25 109406_I13I_I15I_L19L_Q61Q_L63L	Susceptible	Susceptible	Susceptible	Susceptible	Susceptible			Susceptible		Susceptible	Susceptible	Susceptible	Susceptible		Susceptible		Susceptible	Susceptible	Susceptible	Susceptible	Susceptible	Susceptible		Susceptible	Susceptible		Susceptible		Susceptible		Susceptible	Susceptible	Susceptible	Susceptible		Susceptible	Susceptible GSS 1.5		Susceptible GSS 1.5		Susceptible GSS 1.5		Susceptible GSS 1.5	Susceptible GSS 1.5	Susceptible GSS 1	Susceptible GSS 1.5		Susceptible GSS 1.5
xaa_26 109406_I13I_I15I_L19L_Q61Q_L63P	Susceptible	Susceptible	Susceptible	Susceptible	Susceptible			Susceptible		Susceptible	Susceptible	Susceptible	Susceptible		Susceptible		Susceptible	Susceptible	Susceptible	Susceptible	Susceptible	Susceptible		Susceptible	Susceptible		Susceptible		Susceptible		Susceptible	Susceptible	Susceptible	Susceptible		Susceptible	Susceptible GSS 1.5		Susceptible GSS 1.5		Susceptible GSS 1.5		Susceptible GSS 1.5	Susceptible GSS 1.5	Susceptible GSS 1	Susceptible GSS 1.5		Susceptible GSS 1.5
xaa_27 109406_I13I_I15I_L19L_Q61R_L63L	Susceptible	Susceptible	Susceptible	Susceptible	Susceptible			Susceptible		Susceptible	Susceptible	Susceptible	Susceptible		Susceptible		Susceptible	Susceptible	Susceptible	Susceptible	Susceptible	Susceptible		Susceptible	Susceptible		Susceptible		Susceptible		Susceptible	Susceptible	Susceptible	Susceptible		Susceptible	Susceptible GSS 1.5		Susceptible GSS 1.5		Susceptible GSS 1.5		Susceptible GSS 1.5	Susceptible GSS 1.5	Susceptible GSS 1	Susceptible GSS 1.5		Susceptible GSS 1.5
xaa_28 109406_I13I_I15V_L19L_Q61Q_L63L	Susceptible	Susceptible	Susceptible	Susceptible	Susceptible			Susceptible		Susceptible	Susceptible	Susceptible	Susceptible		Susceptible		Susceptible	Susceptible	Susceptible	Susceptible	Susceptible	Susceptible		Susceptible	Susceptible		Susceptible		Susceptible		Susceptible	Susceptible	Susceptible	Susceptible		Susceptible	Susceptible GSS 1.5		Susceptible GSS 1.5		Susceptible GSS 1.5		Susceptible GSS 1.5	Susceptible GSS 1.5	Susceptible GSS 1	Susceptible GSS 1.5		Susceptible GSS 1.5
xaa_29 109406_I13I_I15V_L19L_Q61Q_L63P	Susceptible	Susceptible	Susceptible	Susceptible	Susceptible			Susceptible		Susceptible	Susceptible	Susceptible	Susceptible		Susceptible		Susceptible	Susceptible	Susceptible	Susceptible	Susceptible	Susceptible		Susceptible	Susceptible		Susceptible		Susceptible		Susceptible	Susceptible	Susceptible	Susceptible		Susceptible	Susceptible GSS 1.5		Susceptible GSS 1.5		Susceptible GSS 1.5		Susceptible GSS 1.5	Susceptible GSS 1.5	Susceptible GSS 1	Susceptible GSS 1.5		Susceptible GSS 1.5
xaa_30 109406_I13I_I15V_L19L_Q61R_L63L	Susceptible	Susceptible	Susceptible	Susceptible	Susceptible			Susceptible		Susceptible	Susceptible	Susceptible	Susceptible		Susceptible		Susceptible	Susceptible	Susceptible	Susceptible	Susceptible	Susceptible		Susceptible	Susceptible		Susceptible		Susceptible		Susceptible	Susceptible	Susceptible	Susceptible		Susceptible	Susceptible GSS 1.5		Susceptible GSS 1.5		Susceptible GSS 1.5		Susceptible GSS 1.5	Susceptible GSS 1.5	Susceptible GSS 1	Susceptible GSS 1.5		Susceptible GSS 1.5
xaa_31 109406_I13I_I15V_L19L_Q61R_L63P	Susceptible	Susceptible	Susceptible	Susceptible	Susceptible			Susceptible		Susceptible	Susceptible	Susceptible	Susceptible		Susceptible		Susceptible	Susceptible	Susceptible	Susceptible	Susceptible	Susceptible		Susceptible	Susceptible		Susceptible		Susceptible		Susceptible	Susceptible	Susceptible	Susceptible		Susceptible	Susceptible GSS 1.5		Susceptible GSS 1.5		Susceptible GSS 1.5		Susceptible GSS 1.5	Susceptible GSS 1.5	Susceptible GSS 1	Susceptible GSS 1.5		Susceptible GSS 1.5
xaa_32 109412_L10L_T12S_K14N_I15I_L19L_N37N_R41R_K45K_D60E_L63L	Susceptible	Susceptible	Susceptible	Susceptible	Susceptible			Susceptible		Susceptible	Susceptible	Susceptible	Susceptible		Susceptible		Susceptible	Susceptible	Susceptible	Susceptible	Susceptible	Susceptible		Susceptible	Susceptible		Susceptible		Susceptible		Susceptible	Susceptible	Susceptible	Susceptible		Susceptible	Susceptible GSS 1.5		Susceptible GSS 1.5		Susceptible GSS 1.5		Susceptible GSS 1.5	Susceptible GSS 1.5	Susceptible GSS 1	Susceptible GSS 1.5		Susceptible GSS 1.5
xaa_33 109412_L10L_T12S_K14N_I15V_L19L_N37N_R41R_K45K_D60E_L63L	Susceptible	Susceptible	Susceptible	Susceptible	Susceptible			Susceptible		Susceptible	Susceptible	Susceptible	Susceptible		Susceptible		Susceptible	Susceptible	Susceptible	Susceptible	Susceptible	Susceptible		Susceptible	Susceptible		Susceptible		Susceptible		Susceptible	Susceptible	Susceptible	Susceptible		Susceptible	Susceptible GSS 1.5		Susceptible GSS 1.5		Susceptible GSS 1.5		Susceptible GSS 1.5	Susceptible GSS 1.5	Susceptible GSS 1	Susceptible GSS 1.5		Susceptible GSS 1.5
xaa_34 109412_L10L_T12T_K14N_I15I_L19L_N37D_R41R_K45K_D60E_L63L	Susceptible	Susceptible	Susceptible	Susceptible	Susceptible			Susceptible		Susceptible	Susceptible	Susceptible	Susceptible		Susceptible		Susceptible	Susceptible	Susceptible	Susceptible	Susceptible	Susceptible		Susceptible	Susceptible		Susceptible		Susceptible		Susceptible	Susceptible	Susceptible	Susceptible		Susceptible	Susceptible GSS 1.5		Susceptible GSS 1.5		Susceptible GSS 1.5		Susceptible GSS 1.5	Susceptible GSS 1.5	Susceptible GSS 1	Susceptible GSS 1.5		Susceptible GSS 1.5
xaa_35 109412_L10L_T12T_K14N_I15I_L19L_N37N_R41K_K45K_D60E_L63L	Susceptible	Susceptible	Susceptible	Susceptible	Susceptible			Susceptible		Susceptible	Susceptible	Susceptible	Susceptible		Susceptible		Susceptible	Susceptible	Susceptible	Susceptible	Susceptible	Susceptible		Susceptible	Susceptible		Susceptible		Susceptible		Susceptible	Susceptible	Susceptible	Susceptible		Susceptible	Susceptible GSS 1.5		Susceptible GSS 1.5		Susceptible GSS 1.5		Susceptible GSS 1.5	Susceptible GSS 1.5	Susceptible GSS 1	Susceptible GSS 1.5		Susceptible GSS 1.5
xaa_36 109412_L10L_T12T_K14N_I15I_L19L_N37N_R41K_K45K_D60E_L63P	Susceptible	Susceptible	Susceptible	Susceptible	Susceptible			Susceptible		Susceptible	Susceptible	Susceptible	Susceptible		Susceptible		Susceptible	Susceptible	Susceptible	Susceptible	Susceptible	Susceptible		Susceptible	Susceptible		Susceptible		Susceptible		Susceptible	Susceptible	Susceptible	Susceptible		Susceptible	Susceptible GSS 1.5		Susceptible GSS 1.5		Susceptible GSS 1.5		Susceptible GSS 1.5	Susceptible GSS 1.5	Susceptible GSS 1	Susceptible GSS 1.5		Susceptible GSS 1.5
xaa_37 109412_L10L_T12T_K14N_I15I_L19L_N37N_R41R_K45K_D60D_L63L	Susceptible	Susceptible	Susceptible	Susceptible	Susceptible			Susceptible		Susceptible	Susceptible	Susceptible	Susceptible		Susceptible		Susceptible	Susceptible	Susceptible	Susceptible	Susceptible	Susceptible		Susceptible	Susceptible		Susceptible		Susceptible		Susceptible	Susceptible	Susceptible	Susceptible		Susceptible	Susceptible GSS 1.5		Susceptible GSS 1.5		Susceptible GSS 1.5		Susceptible GSS 1.5	Susceptible GSS 1.5	Susceptible GSS 1	Susceptible GSS 1.5		Susceptible GSS 1.5
xaa_38 109412_L10L_T12T_K14N_I15I_L19L_N37N_R41R_K45K_D60D_L63P	Susceptible	Susceptible	Susceptible	Susceptible	Susceptible			Susceptible		Susceptible	Susceptible	Susceptible	Susceptible		Susceptible		Susceptible	Susceptible	Susceptible	Susceptible	Susceptible	Susceptible		Susceptible	Susceptible		Susceptible		Susceptible		Susceptible	Susceptible	Susceptible	Susceptible		Susceptible	Susceptible GSS 1.5		Susceptible GSS 1.5		Susceptible GSS 1.5		Susceptible GSS 1.5	Susceptible GSS 1.5	Susceptible GSS 1	Susceptible GSS 1.5		Susceptible GSS 1.5
xaa_39 109412_L10L_T12T_K14N_I15I_L19L_N37N_R41R_K45K_D60E_L63L	Susceptible	Susceptible	Susceptible	Susceptible	Susceptible			Susceptible		Susceptible	Susceptible	Susceptible	Susceptible		Susceptible		Susceptible	Susceptible	Susceptible	Susceptible	Susceptible	Susceptible		Susceptible	Susceptible		Susceptible		Susceptible		Susceptible	Susceptible	Susceptible	Susceptible		Susceptible	Susceptible GSS 1.5		Susceptible GSS 1.5		Susceptible GSS 1.5		Susceptible GSS 1.5	Susceptible GSS 1.5	Susceptible GSS 1	Susceptible GSS 1.5		Susceptible GSS 1.5
xaa_40 109412_L10L_T12T_K14N_I15I_L19L_N37N_R41R_K45K_D60E_L63P	Susceptible	Susceptible	Susceptible	Susceptible	Susceptible			Susceptible		Susceptible	Susceptible	Susceptible	Susceptible		Susceptible		Susceptible	Susceptible	Susceptible	Susceptible	Susceptible	Susceptible		Susceptible	Susceptible		Susceptible		Susceptible		Susceptible	Susceptible	Susceptible	Susceptible		Susceptible	Susceptible GSS 1.5		Susceptible GSS 1.5		Susceptible GSS 1.5		Susceptible GSS 1.5	Susceptible GSS 1.5	Susceptible GSS 1	Susceptible GSS 1.5		Susceptible GSS 1.5
xaa_41 109412_L10L_T12T_K14N_I15V_L19L_N37D_R41R_K45K_D60D_L63L	Susceptible	Susceptible	Susceptible	Susceptible	Susceptible			Susceptible		Susceptible	Susceptible	Susceptible	Susceptible		Susceptible		Susceptible	Susceptible	Susceptible	Susceptible	Susceptible	Susceptible		Susceptible	Susceptible		Susceptible		Susceptible		Susceptible	Susceptible	Susceptible	Susceptible		Susceptible	Susceptible GSS 1.5		Susceptible GSS 1.5		Susceptible GSS 1.5		Susceptible GSS 1.5	Susceptible GSS 1.5	Susceptible GSS 1	Susceptible GSS 1.5		Susceptible GSS 1.5
xaa_42 109412_L10L_T12T_K14N_I15V_L19L_N37D_R41R_K45K_D60D_L63P	Susceptible	Susceptible	Susceptible	Susceptible	Susceptible			Susceptible		Susceptible	Susceptible	Susceptible	Susceptible		Susceptible		Susceptible	Susceptible	Susceptible	Susceptible	Susceptible	Susceptible		Susceptible	Susceptible		Susceptible		Susceptible		Susceptible	Susceptible	Susceptible	Susceptible		Susceptible	Susceptible GSS 1.5		Susceptible GSS 1.5		Susceptible GSS 1.5		Susceptible GSS 1.5	Susceptible GSS 1.5	Susceptible GSS 1	Susceptible GSS 1.5		Susceptible GSS 1.5
xaa_43 109412_L10L_T12T_K14N_I15V_L19L_N37D_R41R_K45K_D60E_L63L	Susceptible	Susceptible	Susceptible	Susceptible	Susceptible			Susceptible		Susceptible	Susceptible	Susceptible	Susceptible		Susceptible		Susceptible	Susceptible	Susceptible	Susceptible	Susceptible	Susceptible		Susceptible	Susceptible		Susceptible		Susceptible		Susceptible	Susceptible	Susceptible	Susceptible		Susceptible	Susceptible GSS 1.5		Susceptible GSS 1.5		Susceptible GSS 1.5		Susceptible GSS 1.5	Susceptible GSS 1.5	Susceptible GSS 1	Susceptible GSS 1.5		Susceptible GSS 1.5
xaa_44 109412_L10L_T12T_K14N_I15V_L19L_N37D_R41R_K45K_D60E_L63P	Susceptible	Susceptible	Susceptible	Susceptible	Susceptible			Susceptible		Susceptible	Susceptible	Susceptible	Susceptible		Susceptible		Susceptible	Susceptible	Susceptible	Susceptible	Susceptible	Susceptible		Susceptible	Susceptible		Susceptible		Susceptible		Susceptible	Susceptible	Susceptible	Susceptible		Susceptible	Susceptible GSS 1.5		Susceptible GSS 1.5		Susceptible GSS 1.5		Susceptible GSS 1.5	Susceptible GSS 1.5	Susceptible GSS 1	Susceptible GSS 1.5		Susceptible GSS 1.5
xaa_45 109412_L10L_T12T_K14N_I15V_L19L_N37N_R41K_K45K_D60E_L63L	Susceptible	Susceptible	Susceptible	Susceptible	Susceptible			Susceptible		Susceptible	Susceptible	Susceptible	Susceptible		Susceptible		Susceptible	Susceptible	Susceptible	Susceptible	Susceptible	Susceptible		Susceptible	Susceptible		Susceptible		Susceptible		Susceptible	Susceptible	Susceptible	Susceptible		Susceptible	Susceptible GSS 1.5		Susceptible GSS 1.5		Susceptible GSS 1.5		Susceptible GSS 1.5	Susceptible GSS 1.5	Susceptible GSS 1	Susceptible GSS 1.5		Susceptible GSS 1.5
xaa_46 109412_L10L_T12T_K14N_I15V_L19L_N37N_R41K_K45K_D60E_L63P	Susceptible	Susceptible	Susceptible	Susceptible	Susceptible			Susceptible		Susceptible	Susceptible	Susceptible	Susceptible		Susceptible		Susceptible	Susceptible	Susceptible	Susceptible	Susceptible	Susceptible		Susceptible	Susceptible		Susceptible		Susceptible		Susceptible	Susceptible	Susceptible	Susceptible		Susceptible	Susceptible GSS 1.5		Susceptible GSS 1.5		Susceptible GSS 1.5		Susceptible GSS 1.5	Susceptible GSS 1.5	Susceptible GSS 1	Susceptible GSS 1.5		Susceptible GSS 1.5
xaa_47 109412_L10L_T12T_K14N_I15V_L19L_N37N_R41R_K45K_D60D_L63L	Susceptible	Susceptible	Susceptible	Susceptible	Susceptible			Susceptible		Susceptible	Susceptible	Susceptible	Susceptible		Susceptible		Susceptible	Susceptible	Susceptible	Susceptible	Susceptible	Susceptible		Susceptible	Susceptible		Susceptible		Susceptible		Susceptible	Susceptible	Susceptible	Susceptible		Susceptible	Susceptible GSS 1.5		Susceptible GSS 1.5		Susceptible GSS 1.5		Susceptible GSS 1.5	Susceptible GSS 1.5	Susceptible GSS 1	Susceptible GSS 1.5		Susceptible GSS 1.5
xaa_48 109412_L10L_T12T_K14N_I15V_L19L_N37N_R41R_K45K_D60D_L63P	Susceptible	Susceptible	Susceptible	Susceptible	Susceptible			Susceptible		Susceptible	Susceptible	Susceptible	Susceptible		Susceptible		Susceptible	Susceptible	Susceptible	Susceptible	Susceptible	Susceptible		Susceptible	Susceptible		Susceptible		Susceptible		Susceptible	Susceptible	Susceptible	Susceptible		Susceptible	Susceptible GSS 1.5		Susceptible GSS 1.5		Susceptible GSS 1.5		Susceptible GSS 1.5	Susceptible GSS 1.5	Susceptible GSS 1	Susceptible GSS 1.5		Susceptible GSS 1.5
xaa_49 109412_L10L_T12T_K14N_I15V_L19L_N37N_R41R_K45K_D60E_L63L	Susceptible	Susceptible	Susceptible	Susceptible	Susceptible			Susceptible		Susceptible	Susceptible	Susceptible	Susceptible		Susceptible		Susceptible	Susceptible	Susceptible	Susceptible	Susceptible	Susceptible		Susceptible	Susceptible		Susceptible		Susceptible		Susceptible	Susceptible	Susceptible	Susceptible		Susceptible	Susceptible GSS 1.5		Susceptible GSS 1.5		Susceptible GSS 1.5		Susceptible GSS 1.5	Susceptible GSS 1.5	Susceptible GSS 1	Susceptible GSS 1.5		Susceptible GSS 1.5
xaa_50 109412_L10L_T12T_K14N_I15V_L19L_N37N_R41R_K45K_D60E_L63P	Susceptible	Susceptible	Susceptible	Susceptible	Susceptible			Susceptible		Susceptible	Susceptible	Susceptible	Susceptible		Susceptible		Susceptible	Susceptible	Susceptible	Susceptible	Susceptible	Susceptible		Susceptible	Susceptible		Susceptible		Susceptible		Susceptible	Susceptible	Susceptible	Susceptible		Susceptible	Susceptible GSS 1.5		Susceptible GSS 1.5		Susceptible GSS 1.5		Susceptible GSS 1.5	Susceptible GSS 1.5	Susceptible GSS 1	Susceptible GSS 1.5		Susceptible GSS 1.5
xaa_51 109412_L10L_T12T_K14S_I15I_L19L_N37D_R41R_K45K_D60E_L63L	Susceptible	Susceptible	Susceptible	Susceptible	Susceptible			Susceptible		Susceptible	Susceptible	Susceptible	Susceptible		Susceptible		Susceptible	Susceptible	Susceptible	Susceptible	Susceptible	Susceptible		Susceptible	Susceptible		Susceptible		Susceptible		Susceptible	Susceptible	Susceptible	Susceptible		Susceptible	Susceptible GSS 1.5		Susceptible GSS 1.5		Susceptible GSS 1.5		Susceptible GSS 1.5	Susceptible GSS 1.5	Susceptible GSS 1	Susceptible GSS 1.5		Susceptible GSS 1.5
xaa_52 109412_L10L_T12T_K14S_I15I_L19L_N37N_R41R_K45K_D60D_L63L	Susceptible	Susceptible	Susceptible	Susceptible	Susceptible			Susceptible		Susceptible	Susceptible	Susceptible	Susceptible		Susceptible		Susceptible	Susceptible	Susceptible	Susceptible	Susceptible	Susceptible		Susceptible	Susceptible		Susceptible		Susceptible		Susceptible	Susceptible	Susceptible	Susceptible		Susceptible	Susceptible GSS 1.5		Susceptible GSS 1.5		Susceptible GSS 1.5		Susceptible GSS 1.5	Susceptible GSS 1.5	Susceptible GSS 1	Susceptible GSS 1.5		Susceptible GSS 1.5
xaa_53 109412_L10L_T12T_K14S_I15I_L19L_N37N_R41R_K45K_D60D_L63P	Susceptible	Susceptible	Susceptible	Susceptible	Susceptible			Susceptible		Susceptible	Susceptible	Susceptible	Susceptible		Susceptible		Susceptible	Susceptible	Susceptible	Susceptible	Susceptible	Susceptible		Susceptible	Susceptible		Susceptible		Susceptible		Susceptible	Susceptible	Susceptible	Susceptible		Susceptible	Susceptible GSS 1.5		Susceptible GSS 1.5		Susceptible GSS 1.5		Susceptible GSS 1.5	Susceptible GSS 1.5	Susceptible GSS 1	Susceptible GSS 1.5		Susceptible GSS 1.5
xaa_54 109412_L10L_T12T_K14S_I15I_L19L_N37N_R41R_K45K_D60E_L63L	Susceptible	Susceptible	Susceptible	Susceptible	Susceptible			Susceptible		Susceptible	Susceptible	Susceptible	Susceptible		Susceptible		Susceptible	Susceptible	Susceptible	Susceptible	Susceptible	Susceptible		Susceptible	Susceptible		Susceptible		Susceptible		Susceptible	Susceptible	Susceptible	Susceptible		Susceptible	Susceptible GSS 1.5		Susceptible GSS 1.5		Susceptible GSS 1.5		Susceptible GSS 1.5	Susceptible GSS 1.5	Susceptible GSS 1	Susceptible GSS 1.5		Susceptible GSS 1.5
xaa_55 109412_L10L_T12T_K14S_I15I_L19L_N37N_R41R_K45K_D60E_L63P	Susceptible	Susceptible	Susceptible	Susceptible	Susceptible			Susceptible		Susceptible	Susceptible	Susceptible	Susceptible		Susceptible		Susceptible	Susceptible	Susceptible	Susceptible	Susceptible	Susceptible		Susceptible	Susceptible		Susceptible		Susceptible		Susceptible	Susceptible	Susceptible	Susceptible		Susceptible	Susceptible GSS 1.5		Susceptible GSS 1.5		Susceptible GSS 1.5		Susceptible GSS 1.5	Susceptible GSS 1.5	Susceptible GSS 1	Susceptible GSS 1.5		Susceptible GSS 1.5
xaa_56 109412_L10L_T12T_K14S_I15V_L19L_N37D_R41R_K45K_D60E_L63L	Susceptible	Susceptible	Susceptible	Susceptible	Susceptible			Susceptible		Susceptible	Susceptible	Susceptible	Susceptible		Susceptible		Susceptible	Susceptible	Susceptible	Susceptible	Susceptible	Susceptible		Susceptible	Susceptible		Susceptible		Susceptible		Susceptible	Susceptible	Susceptible	Susceptible		Susceptible	Susceptible GSS 1.5		Susceptible GSS 1.5		Susceptible GSS 1.5		Susceptible GSS 1.5	Susceptible GSS 1.5	Susceptible GSS 1	Susceptible GSS 1.5		Susceptible GSS 1.5
xaa_57 109412_L10L_T12T_K14S_I15V_L19L_N37N_R41K_K45K_D60E_L63L	Susceptible	Susceptible	Susceptible	Susceptible	Susceptible			Susceptible		Susceptible	Susceptible	Susceptible	Susceptible		Susceptible		Susceptible	Susceptible	Susceptible	Susceptible	Susceptible	Susceptible		Susceptible	Susceptible		Susceptible		Susceptible		Susceptible	Susceptible	Susceptible	Susceptible		Susceptible	Susceptible GSS 1.5		Susceptible GSS 1.5		Susceptible GSS 1.5		Susceptible GSS 1.5	Susceptible GSS 1.5	Susceptible GSS 1	Susceptible GSS 1.5		Susceptible GSS 1.5
xaa_58 109412_L10L_T12T_K14S_I15V_L19L_N37N_R41K_K45K_D60E_L63P	Susceptible	Susceptible	Susceptible	Susceptible	Susceptible			Susceptible		Susceptible	Susceptible	Susceptible	Susceptible		Susceptible		Susceptible	Susceptible	Susceptible	Susceptible	Susceptible	Susceptible		Susceptible	Susceptible		Susceptible		Susceptible		Susceptible	Susceptible	Susceptible	Susceptible		Susceptible	Susceptible GSS 1.5		Susceptible GSS 1.5		Susceptible GSS 1.5		Susceptible GSS 1.5	Susceptible GSS 1.5	Susceptible GSS 1	Susceptible GSS 1.5		Susceptible GSS 1.5
xaa_59 109412_L10L_T12T_K14S_I15V_L19L_N37N_R41R_K45K_D60D_L63L	Susceptible	Susceptible	Susceptible	Susceptible	Susceptible			Susceptible		Susceptible	Susceptible	Susceptible	Susceptible		Susceptible		Susceptible	Susceptible	Susceptible	Susceptible	Susceptible	Susceptible		Susceptible	Susceptible		Susceptible		Susceptible		Susceptible	Susceptible	Susceptible	Susceptible		Susceptible	Susceptible GSS 1.5		Susceptible GSS 1.5		Susceptible GSS 1.5		Susceptible GSS 1.5	Susceptible GSS 1.5	Susceptible GSS 1	Susceptible GSS 1.5		Susceptible GSS 1.5
xaa_60 109412_L10L_T12T_K14S_I15V_L19L_N37N_R41R_K45K_D60E_L63L	Susceptible	Susceptible	Susceptible	Susceptible	Susceptible			Susceptible		Susceptible	Susceptible	Susceptible	Susceptible		Susceptible		Susceptible	Susceptible	Susceptible	Susceptible	Susceptible	Susceptible		Susceptible	Susceptible		Susceptible		Susceptible		Susceptible	Susceptible	Susceptible	Susceptible		Susceptible	Susceptible GSS 1.5		Susceptible GSS 1.5		Susceptible GSS 1.5		Susceptible GSS 1.5	Susceptible GSS 1.5	Susceptible GSS 1	Susceptible GSS 1.5		Susceptible GSS 1.5
xaa_61 109418_V77I	Susceptible	Susceptible	Susceptible	Susceptible	Susceptible			Susceptible		Susceptible	Susceptible	Susceptible	Susceptible		Susceptible		Susceptible	Susceptible	Susceptible	Susceptible	Susceptible	Susceptible		Susceptible	Susceptible		Susceptible		Susceptible		Susceptible	Susceptible	Susceptible	Susceptible		Susceptible	Susceptible GSS 1.5		Susceptible GSS 1.5		Susceptible GSS 1.5		Susceptible GSS 1.5	Susceptible GSS 1.5	Susceptible GSS 1	Susceptible GSS 1.5		Susceptible GSS 1.5
xaa_62 109418_V77V	Susceptible	Susceptible	Susceptible	Susceptible	Susceptible			Susceptible		Susceptible	Susceptible	Susceptible	Susceptible		Susceptible		Susceptible	Susceptible	Susceptible	Susceptible	Susceptible	Susceptible		Susceptible	Susceptible		Susceptible		Susceptible		Susceptible	Susceptible	Susceptible	Susceptible		Susceptible	Susceptible GSS 1.5		Susceptible GSS 1.5		Susceptible GSS 1.5		Susceptible GSS 1.5	Susceptible GSS 1.5	Susceptible GSS 1	Susceptible GSS 1.5		Susceptible GSS 1.5
xaa_63 109428_L19L_L63L_I64I	Susceptible	Susceptible	Susceptible	Susceptible	Susceptible			Susceptible		Susceptible	Susceptible	Susceptible	Susceptible		Susceptible		Susceptible	Susceptible	Susceptible	Susceptible	Susceptible	Susceptible		Susceptible	Susceptible		Susceptible		Susceptible		Susceptible	Susceptible	Susceptible	Susceptible		Susceptible	Susceptible GSS 1.5		Susceptible GSS 1.5		Susceptible GSS 1.5		Susceptible GSS 1.5	Susceptible GSS 1.5	Susceptible GSS 1	Susceptible GSS 1.5		Susceptible GSS 1.5
xaa_64 109428_L19L_L63L_I64V	Susceptible	Susceptible	Susceptible	Susceptible	Susceptible			Susceptible		Susceptible	Susceptible	Susceptible	Susceptible		Susceptible		Susceptible	Susceptible	Susceptible	Susceptible	Susceptible	Susceptible		Susceptible	Susceptible		Susceptible		Susceptible		Susceptible	Susceptible	Susceptible	Susceptible		Susceptible	Susceptible GSS 1.5		Susceptible GSS 1.5		Susceptible GSS 1.5		Susceptible GSS 1.5	Susceptible GSS 1.5	Susceptible GSS 1	Susceptible GSS 1.5		Susceptible GSS 1.5
xaa_65 109428_L19L_L63P_I64I	Susceptible	Susceptible	Susceptible	Susceptible	Susceptible			Susceptible		Susceptible	Susceptible	Susceptible	Susceptible		Susceptible		Susceptible	Susceptible	Susceptible	Susceptible	Susceptible	Susceptible		Susceptible	Susceptible		Susceptible		Susceptible		Susceptible	Susceptible	Susceptible	Susceptible		Susceptible	Susceptible GSS 1.5		Susceptible GSS 1.5		Susceptible GSS 1.5		Susceptible GSS 1.5	Susceptible GSS 1.5	Susceptible GSS 1	Susceptible GSS 1.5		Susceptible GSS 1.5
xaa_66 109428_L19L_L63P_I64V	Susceptible	Susceptible	Susceptible	Susceptible	Susceptible			Susceptible		Susceptible	Susceptible	Susceptible	Susceptible		Susceptible		Susceptible	Susceptible	Susceptible	Susceptible	Susceptible	Susceptible		Susceptible	Susceptible		Susceptible		Susceptible		Susceptible	Susceptible	Susceptible	Susceptible		Susceptible	Susceptible GSS 1.5		Susceptible GSS 1.5		Susceptible GSS 1.5		Susceptible GSS 1.5	Susceptible GSS 1.5	Susceptible GSS 1	Susceptible GSS 1.5		Susceptible GSS 1.5
xaa_67 109454_I15I_I64V	Susceptible	Susceptible	Susceptible	Susceptible	Susceptible			Susceptible		Susceptible	Susceptible	Susceptible	Susceptible		Susceptible		Susceptible	Susceptible	Susceptible	Susceptible	Susceptible	Susceptible		Susceptible	Susceptible		Susceptible		Susceptible		Susceptible	Susceptible	Susceptible	Susceptible		Susceptible	Susceptible GSS 1.5		Susceptible GSS 1.5		Susceptible GSS 1.5		Susceptible GSS 1.5	Susceptible GSS 1.5	Susceptible GSS 1	Susceptible GSS 1.5		Susceptible GSS 1.5
xaa_68 109454_I15V_I64I	Susceptible	Susceptible	Susceptible	Susceptible	Susceptible			Susceptible		Susceptible	Susceptible	Susceptible	Susceptible		Susceptible		Susceptible	Susceptible	Susceptible	Susceptible	Susceptible	Susceptible		Susceptible	Susceptible		Susceptible		Susceptible		Susceptible	Susceptible	Susceptible	Susceptible		Susceptible	Susceptible GSS 1.5		Susceptible GSS 1.5		Susceptible GSS 1.5		Susceptible GSS 1.5	Susceptible GSS 1.5	Susceptible GSS 1	Susceptible GSS 1.5		Susceptible GSS 1.5
xaa_69 109454_I15V_I64V	Susceptible	Susceptible	Susceptible	Susceptible	Susceptible			Susceptible		Susceptible	Susceptible	Susceptible	Susceptible		Susceptible		Susceptible	Susceptible	Susceptible	Susceptible	Susceptible	Susceptible		Susceptible	Susceptible		Susceptible		Susceptible		Susceptible	Susceptible	Susceptible	Susceptible		Susceptible	Susceptible GSS 1.5		Susceptible GSS 1.5		Susceptible GSS 1.5		Susceptible GSS 1.5	Susceptible GSS 1.5	Susceptible GSS 1	Susceptible GSS 1.5		Susceptible GSS 1.5
xaa_70 109462_I13I_L63H_I72V	Susceptible	Susceptible	Susceptible	Susceptible	Susceptible			Susceptible		Susceptible	Susceptible	Susceptible	Susceptible		Susceptible		Susceptible	Susceptible	Susceptible	Susceptible	Susceptible	Susceptible		Susceptible	Susceptible		Susceptible		Susceptible		Susceptible	Susceptible	Susceptible	Susceptible		Susceptible	Susceptible GSS 1.5		Susceptible GSS 1.5		Susceptible GSS 1.5		Susceptible GSS 1.5	Susceptible GSS 1.5	Susceptible GSS 1	Susceptible GSS 1.5		Susceptible GSS 1.5
xaa_71 109462_I13I_L63Q_I72V	Susceptible	Susceptible	Susceptible	Susceptible	Susceptible			Susceptible		Susceptible	Susceptible	Susceptible	Susceptible		Susceptible		Susceptible	Susceptible	Susceptible	Susceptible	Susceptible	Susceptible		Susceptible	Susceptible		Susceptible		Susceptible		Susceptible	Susceptible	Susceptible	Susceptible		Susceptible	Susceptible GSS 1.5		Susceptible GSS 1.5		Susceptible GSS 1.5		Susceptible GSS 1.5	Susceptible GSS 1.5	Susceptible GSS 1	Susceptible GSS 1.5		Susceptible GSS 1.5
xaa_72 109472	Susceptible	Susceptible	Susceptible	Susceptible	Susceptible			Susceptible		Susceptible	Susceptible	Susceptible	Susceptible		Possible resistance		Susceptible	Susceptible	Susceptible	Susceptible	Susceptible	Susceptible		Susceptible	Susceptible		Susceptible		Susceptible		Susceptible	Susceptible	Susceptible	Susceptible		Susceptible	Susceptible GSS 1.5		Susceptible GSS 1.5		Susceptible GSS 1.5		Susceptible GSS 1.5	Susceptible GSS 1.5	Susceptible GSS 1	Susceptible GSS 1.5		Susceptible GSS 1.5
xaa_73 109474_I15I_K43K_I72V_L90M	Susceptible	Intermediate	flagged mutations	flagged mutations	Susceptible			Susceptible		flagged mutations	flagged mutations	Susceptible	Susceptible		Susceptible		Susceptible	Susceptible	Possible resistance	Susceptible	Resistance	Possible resistance		Susceptible	Low-Level Resistance		Low-Level Resistance		Susceptible		Intermediate Resistance	Low-Level Resistance	High-Level Resistance	Intermediate Resistance		Susceptible	Susceptible GSS 1.5		Susceptible GSS 1.5		Susceptible GSS 1.5		Susceptible GSS 1.5	Susceptible GSS 1.5	Resistant GSS 0	Intermediate Resistant GSS 0.75		Susceptible GSS 1.5
xaa_74 109476	Susceptible	Susceptible	Susceptible	Susceptible	Susceptible			Susceptible		Susceptible	Susceptible	Susceptible	Susceptible		Susceptible		Susceptible	Susceptible	Susceptible	Susceptible	Susceptible	Susceptible		Susceptible	Susceptible		Susceptible		Susceptible		Susceptible	Susceptible	Susceptible	Susceptible		Susceptible	Susceptible GSS 1.5		Susceptible GSS 1.5		Susceptible GSS 1.5		Susceptible GSS 1.5	Susceptible GSS 1.5	Susceptible GSS 1	Susceptible GSS 1.5		Susceptible GSS 1.5
xaa_75 116495	Susceptible	Susceptible	Susceptible	Susceptible	Susceptible			Susceptible		Susceptible	Susceptible	Susceptible	Susceptible		Susceptible		Susceptible	Susceptible	Susceptible	Susceptible	Susceptible	Susceptible		Susceptible	Susceptible		Susceptible		Susceptible		Susceptible	Susceptible	Susceptible	Susceptible		Susceptible	Susceptible GSS 1.5		Susceptible GSS 1.5		Susceptible GSS 1.5		Susceptible GSS 1.5	Susceptible GSS 1.5	Susceptible GSS 1	Susceptible GSS 1.5		Susceptible GSS 1.5
xaa_76 116497_I72I	Susceptible	Susceptible	Susceptible	Susceptible	Susceptible			Susceptible		Susceptible	Susceptible	Susceptible	Susceptible		Susceptible		Susceptible	Susceptible	Susceptible	Susceptible	Susceptible	Susceptible		Susceptible	Susceptible		Susceptible		Susceptible		Susceptible	Susceptible	Susceptible	Susceptible		Susceptible	Susceptible GSS 1.5		Susceptible GSS 1.5		Susceptible GSS 1.5		Susceptible GSS 1.5	Susceptible GSS 1.5	Susceptible GSS 1	Susceptible GSS 1.5		Susceptible GSS 1.5
xaa_77 116497_I72M	Susceptible	Susceptible	Susceptible	Susceptible	Susceptible			Susceptible		Susceptible	Susceptible	Susceptible	Susceptible		Susceptible		Susceptible	Susceptible	Susceptible	Susceptible	Susceptible	Susceptible		Susceptible	Susceptible		Susceptible		Susceptible		Susceptible	Susceptible	Susceptible	Susceptible		Susceptible	Susceptible GSS 1.5		Susceptible GSS 1.5		Susceptible GSS 1.5		Susceptible GSS 1.5	Susceptible GSS 1.5	Susceptible GSS 1	Susceptible GSS 1.5		Susceptible GSS 1.5
xaa_78 116503_M36I_R41K_I62I_V77I	Susceptible	Susceptible	Susceptible	Susceptible	Susceptible			Susceptible		Susceptible	Susceptible	Susceptible	Susceptible		Susceptible		Susceptible	Susceptible	Susceptible	Susceptible	Susceptible	Susceptible		Susceptible	Susceptible		Susceptible		Susceptible		Susceptible	Susceptible	Susceptible	Susceptible		Susceptible	Susceptible GSS 1.5		Susceptible GSS 1.5		Susceptible GSS 1.5		Susceptible GSS 1.5	Susceptible GSS 1.5	Susceptible GSS 1	Susceptible GSS 1.5		Susceptible GSS 1.5
xaa_79 116503_M36I_R41K_I62I_V77V	Susceptible	Susceptible	Susceptible	Susceptible	Susceptible			Susceptible		Susceptible	Susceptible	Susceptible	Susceptible		Susceptible		Susceptible	Susceptible	Susceptible	Susceptible	Susceptible	Susceptible		Susceptible	Susceptible		Susceptible		Susceptible		Susceptible	Susceptible	Susceptible	Susceptible		Susceptible	Susceptible GSS 1.5		Susceptible GSS 1.5		Susceptible GSS 1.5		Susceptible GSS 1.5	Susceptible GSS 1.5	Susceptible GSS 1	Susceptible GSS 1.5		Susceptible GSS 1.5
xaa_80 116503_M36I_R41K_I62V_V77I	Susceptible	Susceptible	Susceptible	Susceptible	Susceptible			Susceptible		Susceptible	Susceptible	Susceptible	Susceptible		Susceptible		Susceptible	Susceptible	Susceptible	Susceptible	Susceptible	Susceptible		Susceptible	Susceptible		Susceptible		Susceptible		Susceptible	Susceptible	Susceptible	Susceptible		Susceptible	Susceptible GSS 1.5		Susceptible GSS 1.5		Susceptible GSS 1.5		Susceptible GSS 1.5	Susceptible GSS 1.5	Susceptible GSS 1	Susceptible GSS 1.5		Susceptible GSS 1.5
xaa_81 116503_M36I_R41K_I62V_V77V	Susceptible	Susceptible	Susceptible	Susceptible	Susceptible			Susceptible		Susceptible	Susceptible	Susceptible	Susceptible		Susceptible		Susceptible	Susceptible	Susceptible	Susceptible	Susceptible	Susceptible		Susceptible	Susceptible		Susceptible		Susceptible		Susceptible	Susceptible	Susceptible	Susceptible		Susceptible	Susceptible GSS 1.5		Susceptible GSS 1.5		Susceptible GSS 1.5		Susceptible GSS 1.5	Susceptible GSS 1.5	Susceptible GSS 1	Susceptible GSS 1.5		Susceptible GSS 1.5
xaa_82 116503_M36I_R41R_I62I_V77I	Susceptible	Susceptible	Susceptible	Susceptible	Susceptible			Susceptible		Susceptible	Susceptible	Susceptible	Susceptible		Susceptible		Susceptible	Susceptible	Susceptible	Susceptible	Susceptible	Susceptible		Susceptible	Susceptible		Susceptible		Susceptible		Susceptible	Susceptible	Susceptible	Susceptible		Susceptible	Susceptible GSS 1.5		Susceptible GSS 1.5		Susceptible GSS 1.5		Susceptible GSS 1.5	Susceptible GSS 1.5	Susceptible GSS 1	Susceptible GSS 1.5		Susceptible GSS 1.5
xaa_83 116503_M36I_R41R_I62I_V77V	Susceptible	Susceptible	Susceptible	Susceptible	Susceptible			Susceptible		Susceptible	Susceptible	Susceptible	Susceptible		Susceptible		Susceptible	Susceptible	Susceptible	Susceptible	Susceptible	Susceptible		Susceptible	Susceptible		Susceptible		Susceptible		Susceptible	Susceptible	Susceptible	Susceptible		Susceptible	Susceptible GSS 1.5		Susceptible GSS 1.5		Susceptible GSS 1.5		Susceptible GSS 1.5	Susceptible GSS 1.5	Susceptible GSS 1	Susceptible GSS 1.5		Susceptible GSS 1.5
xaa_84 116503_M36I_R41R_I62V_V77I	Susceptible	Susceptible	Susceptible	Susceptible	Susceptible			Susceptible		Susceptible	Susceptible	Susceptible	Susceptible		Susceptible		Susceptible	Susceptible	Susceptible	Susceptible	Susceptible	Susceptible		Susceptible	Susceptible		Susceptible		Susceptible		Susceptible	Susceptible	Susceptible	Susceptible		Susceptible	Susceptible GSS 1.5		Susceptible GSS 1.5		Susceptible GSS 1.5		Susceptible GSS 1.5	Susceptible GSS 1.5	Susceptible GSS 1	Susceptible GSS 1.5		Susceptible GSS 1.5
xaa_85 116503_M36I_R41R_I62V_V77V	Susceptible	Susceptible	Susceptible	Susceptible	Susceptible			Susceptible		Susceptible	Susceptible	Susceptible	Susceptible		Susceptible		Susceptible	Susceptible	Susceptible	Susceptible	Susceptible	Susceptible		Susceptible	Susceptible		Susceptible		Susceptible		Susceptible	Susceptible	Susceptible	Susceptible		Susceptible	Susceptible GSS 1.5		Susceptible GSS 1.5		Susceptible GSS 1.5		Susceptible GSS 1.5	Susceptible GSS 1.5	Susceptible GSS 1	Susceptible GSS 1.5		Susceptible GSS 1.5
xaa_86 116503_M36M_R41K_I62I_V77I	Susceptible	Susceptible	Susceptible	Susceptible	Susceptible			Susceptible		Susceptible	Susceptible	Susceptible	Susceptible		Susceptible		Susceptible	Susceptible	Susceptible	Susceptible	Susceptible	Susceptible		Susceptible	Susceptible		Susceptible		Susceptible		Susceptible	Susceptible	Susceptible	Susceptible		Susceptible	Susceptible GSS 1.5		Susceptible GSS 1.5		Susceptible GSS 1.5		Susceptible GSS 1.5	Susceptible GSS 1.5	Susceptible GSS 1	Susceptible GSS 1.5		Susceptible GSS 1.5
xaa_87 116503_M36M_R41K_I62V_V77I	Susceptible	Susceptible	Susceptible	Susceptible	Susceptible			Susceptible		Susceptible	Susceptible	Susceptible	Susceptible		Susceptible		Susceptible	Susceptible	Susceptible	Susceptible	Susceptible	Susceptible		Susceptible	Susceptible		Susceptible		Susceptible		Susceptible	Susceptible	Susceptible	Susceptible		Susceptible	Susceptible GSS 1.5		Susceptible GSS 1.5		Susceptible GSS 1.5		Susceptible GSS 1.5	Susceptible GSS 1.5	Susceptible GSS 1	Susceptible GSS 1.5		Susceptible GSS 1.5
xaa_88 116503_M36M_R41R_I62I_V77I	Susceptible	Susceptible	Susceptible	Susceptible	Susceptible			Susceptible		Susceptible	Susceptible	Susceptible	Susceptible		Susceptible		Susceptible	Susceptible	Susceptible	Susceptible	Susceptible	Susceptible		Susceptible	Susceptible		Susceptible		Susceptible		Susceptible	Susceptible	Susceptible	Susceptible		Susceptible	Susceptible GSS 1.5		Susceptible GSS 1.5		Susceptible GSS 1.5		Susceptible GSS 1.5	Susceptible GSS 1.5	Susceptible GSS 1	Susceptible GSS 1.5		Susceptible GSS 1.5
xaa_89 116503_M36M_R41R_I62V_V77I	Susceptible	Susceptible	Susceptible	Susceptible	Susceptible			Susceptible		Susceptible	Susceptible	Susceptible	Susceptible		Susceptible		Susceptible	Susceptible	Susceptible	Susceptible	Susceptible	Susceptible		Susceptible	Susceptible		Susceptible		Susceptible		Susceptible	Susceptible	Susceptible	Susceptible		Susceptible	Susceptible GSS 1.5		Susceptible GSS 1.5		Susceptible GSS 1.5		Susceptible GSS 1.5	Susceptible GSS 1.5	Susceptible GSS 1	Susceptible GSS 1.5		Susceptible GSS 1.5
xaa_90 116503_M36M_R41R_I62V_V77V	Susceptible	Susceptible	Susceptible	Susceptible	Susceptible			Susceptible		Susceptible	Susceptible	Susceptible	Susceptible		Susceptible		Susceptible	Susceptible	Susceptible	Susceptible	Susceptible	Susceptible		Susceptible	Susceptible		Susceptible		Susceptible		Susceptible	Susceptible	Susceptible	Susceptible		Susceptible	Susceptible GSS 1.5		Susceptible GSS 1.5		Susceptible GSS 1.5		Susceptible GSS 1.5	Susceptible GSS 1.5	Susceptible GSS 1	Susceptible GSS 1.5		Susceptible GSS 1.5
xaa_91 117007_L19L	Susceptible	Susceptible	Susceptible	Susceptible	Susceptible			Susceptible		Susceptible	Susceptible	Susceptible	Susceptible		Susceptible		Susceptible	Susceptible	Susceptible	Susceptible	Susceptible	Susceptible		Susceptible	Susceptible		Susceptible		Susceptible		Susceptible	Susceptible	Susceptible	Susceptible		Susceptible	Susceptible GSS 1.5		Susceptible GSS 1.5		Susceptible GSS 1.5		Susceptible GSS 1.5	Susceptible GSS 1.5	Susceptible GSS 1	Susceptible GSS 1.5		Susceptible GSS 1.5
xaa_92 147987_I13I_K14K_N37C_R41R	Susceptible	Susceptible	Susceptible	Susceptible	Susceptible			Susceptible		Susceptible	Susceptible	Susceptible	Susceptible		Susceptible		Susceptible	Susceptible	Susceptible	Susceptible	Susceptible	Susceptible		Susceptible	Susceptible		Susceptible		Susceptible		Susceptible	Susceptible	Susceptible	Susceptible		Susceptible	Susceptible GSS 1.5		Susceptible GSS 1.5		Susceptible GSS 1.5		Susceptible GSS 1.5	Susceptible GSS 1.5	Susceptible GSS 1	Susceptible GSS 1.5		Susceptible GSS 1.5
xaa_93 147987_I13I_K14K_N37S_R41K	Susceptible	Susceptible	Susceptible	Susceptible	Susceptible			Susceptible		Susceptible	Susceptible	Susceptible	Susceptible		Susceptible		Susceptible	Susceptible	Susceptible	Susceptible	Susceptible	Susceptible		Susceptible	Susceptible		Susceptible		Susceptible		Susceptible	Susceptible	Susceptible	Susceptible		Susceptible	Susceptible GSS 1.5		Susceptible GSS 1.5		Susceptible GSS 1.5		Susceptible GSS 1.5	Susceptible GSS 1.5	Susceptible GSS 1	Susceptible GSS 1.5		Susceptible GSS 1.5
xaa_94 147987_I13I_K14K_N37S_R41R	Susceptible	Susceptible	Susceptible	Susceptible	Susceptible			Susceptible		Susceptible	Susceptible	Susceptible	Susceptible		Susceptible		Susceptible	Susceptible	Susceptible	Susceptible	Susceptible	Susceptible		Susceptible	Susceptible		Susceptible		Susceptible		Susceptible	Susceptible	Susceptible	Susceptible		Susceptible	Susceptible GSS 1.5		Susceptible GSS 1.5		Susceptible GSS 1.5		Susceptible GSS 1.5	Susceptible GSS 1.5	Susceptible GSS 1	Susceptible GSS 1.5		Susceptible GSS 1.5
xaa_95 147987_I13I_K14R_N37C_R41R	Susceptible	Susceptible	Susceptible	Susceptible	Susceptible			Susceptible		Susceptible	Susceptible	Susceptible	Susceptible		Susceptible		Susceptible	Susceptible	Susceptible	Susceptible	Susceptible	Susceptible		Susceptible	Susceptible		Susceptible		Susceptible		Susceptible	Susceptible	Susceptible	Susceptible		Susceptible	Susceptible GSS 1.5		Susceptible GSS 1.5		Susceptible GSS 1.5		Susceptible GSS 1.5	Susceptible GSS 1.5	Susceptible GSS 1	Susceptible GSS 1.5		Susceptible GSS 1.5
xaa_96 147987_I13I_K14R_N37S_R41R	Susceptible	Susceptible	Susceptible	Susceptible	Susceptible			Susceptible		Susceptible	Susceptible	Susceptible	Susceptible		Susceptible		Susceptible	Susceptible	Susceptible	Susceptible	Susceptible	Susceptible		Susceptible	Susceptible		Susceptible		Susceptible		Susceptible	Susceptible	Susceptible	Susceptible		Susceptible	Susceptible GSS 1.5		Susceptible GSS 1.5		Susceptible GSS 1.5		Susceptible GSS 1.5	Susceptible GSS 1.5	Susceptible GSS 1	Susceptible GSS 1.5		Susceptible GSS 1.5
xaa_97 147989	Susceptible	Susceptible	Susceptible	Susceptible	Susceptible			Susceptible		Susceptible	Susceptible	Susceptible	Susceptible		Susceptible		Susceptible	Susceptible	Susceptible	Susceptible	Susceptible	Susceptible		Susceptible	Susceptible		Susceptible		Susceptible		Susceptible	Susceptible	Susceptible	Susceptible		Susceptible	Susceptible GSS 1.5		Susceptible GSS 1.5		Susceptible GSS 1.5		Susceptible GSS 1.5	Susceptible GSS 1.5	Susceptible GSS 1	Susceptible GSS 1.5		Susceptible GSS 1.5
xaa_98 147999	Susceptible	Susceptible	Susceptible	Susceptible	Susceptible			Susceptible		Susceptible	Susceptible	Susceptible	Susceptible		Susceptible		Susceptible	Susceptible	Susceptible	Susceptible	Susceptible	Susceptible		Susceptible	Susceptible		Susceptible		Susceptible		Susceptible	Susceptible	Susceptible	Susceptible		Susceptible	Susceptible GSS 1.5		Susceptible GSS 1.5		Susceptible GSS 1.5		Susceptible GSS 1.5	Susceptible GSS 1.5	Susceptible GSS 1	Susceptible GSS 1.5		Susceptible GSS 1.5
xaa_99 148017_M36I	Susceptible	Susceptible	Susceptible	Susceptible	Susceptible			Susceptible		Susceptible	Susceptible	Susceptible	Susceptible		Susceptible		Susceptible	Susceptible	Susceptible	Susceptible	Susceptible	Susceptible		Susceptible	Susceptible		Susceptible		Susceptible		Susceptible	Susceptible	Susceptible	Susceptible		Susceptible	Susceptible GSS 1.5		Susceptible GSS 1.5		Susceptible GSS 1.5		Susceptible GSS 1.5	Susceptible GSS 1.5	Susceptible GSS 1	Susceptible GSS 1.5		Susceptible GSS 1.5
xaa_100 148019	Susceptible	Susceptible	Susceptible	Susceptible	Susceptible			Susceptible		Susceptible	Susceptible	Susceptible	Susceptible		Susceptible		Susceptible	Susceptible	Susceptible	Susceptible	Susceptible	Susceptible		Susceptible	Susceptible		Susceptible		Susceptible		Susceptible	Susceptible	Susceptible	Susceptible		Susceptible	Susceptible GSS 1.5		Susceptible GSS 1.5		Susceptible GSS 1.5		Susceptible GSS 1.5	Susceptible GSS 1.5	Susceptible GSS 1	Susceptible GSS 1.5		Susceptible GSS 1.5
xaa_101 148025	Susceptible	Susceptible	Susceptible	Susceptible	Susceptible			Susceptible		Susceptible	Susceptible	Susceptible	Susceptible		Susceptible		Susceptible	Susceptible	Susceptible	Susceptible	Susceptible	Susceptible		Susceptible	Susceptible		Susceptible		Susceptible		Susceptible	Susceptible	Susceptible	Susceptible		Susceptible	Susceptible GSS 1.5		Susceptible GSS 1.5		Susceptible GSS 1.5		Susceptible GSS 1.5	Susceptible GSS 1.5	Susceptible GSS 1	Susceptible GSS 1.5		Susceptible GSS 1.5
xaa_102 148027_N37S_R41R	Susceptible	Susceptible	Susceptible	Susceptible	Susceptible			Susceptible		Susceptible	Susceptible	Susceptible	Susceptible		Susceptible		Susceptible	Susceptible	Susceptible	Susceptible	Susceptible	Susceptible		Susceptible	Susceptible		Susceptible		Susceptible		Susceptible	Susceptible	Susceptible	Susceptible		Susceptible	Susceptible GSS 1.5		Susceptible GSS 1.5		Susceptible GSS 1.5		Susceptible GSS 1.5	Susceptible GSS 1.5	Susceptible GSS 1	Susceptible GSS 1.5		Susceptible GSS 1.5
xaa_103 148033	Susceptible	Susceptible	Susceptible	Susceptible	Susceptible			Susceptible		Susceptible	Susceptible	Susceptible	Susceptible		Susceptible		Susceptible	Susceptible	Susceptible	Susceptible	Susceptible	Possible resistance		Susceptible	Susceptible		Susceptible		Susceptible		Susceptible	Susceptible	Susceptible	Susceptible		Susceptible	Susceptible GSS 1.5		Susceptible GSS 1.5		Susceptible GSS 1.5		Susceptible GSS 1.5	Susceptible GSS 1.5	Susceptible GSS 1	Susceptible GSS 1.5		Susceptible GSS 1.5
xaa_104 148037_Q61E_L63K_I72E	Susceptible	Susceptible	Susceptible	Susceptible	Susceptible			Susceptible		Susceptible	Susceptible	Susceptible	Susceptible		Possible resistance		Susceptible	Susceptible	Susceptible	Susceptible	Susceptible	Possible resistance		Susceptible	Susceptible		Susceptible		Susceptible		Susceptible	Susceptible	Susceptible	Susceptible		Susceptible	Susceptible GSS 1.5		Susceptible GSS 1.5		Susceptible GSS 1.5		Susceptible GSS 1.5	Susceptible GSS 1.5	Susceptible GSS 1	Susceptible GSS 1.5		Susceptible GSS 1.5
xaa_105 148037_Q61E_L63K_I72V	Susceptible	Susceptible	Susceptible	Susceptible	Susceptible			Susceptible		Susceptible	Susceptible	Susceptible	Susceptible		Possible resistance		Susceptible	Susceptible	Susceptible	Susceptible	Susceptible	Possible resistance		Susceptible	Susceptible		Susceptible		Susceptible		Susceptible	Susceptible	Susceptible	Susceptible		Susceptible	Susceptible GSS 1.5		Susceptible GSS 1.5		Susceptible GSS 1.5		Susceptible GSS 1.5	Susceptible GSS 1.5	Susceptible GSS 1	Susceptible GSS 1.5		Susceptible GSS 1.5
xaa_106 148037_Q61E_L63Q_I72E	Susceptible	Susceptible	Susceptible	Susceptible	Susceptible			Susceptible		Susceptible	Susceptible	Susceptible	Susceptible		Possible resistance		Susceptible	Susceptible	Susceptible	Susceptible	Susceptible	Possible resistance		Susceptible	Susceptible		Susceptible		Susceptible		Susceptible	Susceptible	Susceptible	Susceptible		Susceptible	Susceptible GSS 1.5		Susceptible GSS 1.5		Susceptible GSS 1.5		Susceptible GSS 1.5	Susceptible GSS 1.5	Susceptible GSS 1	Susceptible GSS 1.5		Susceptible GSS 1.5
xaa_107 148037_Q61E_L63Q_I72V	Susceptible	Susceptible	Susceptible	Susceptible	Susceptible			Susceptible		Susceptible	Susceptible	Susceptible	Susceptible		Possible resistance		Susceptible	Susceptible	Susceptible	Susceptible	Susceptible	Possible resistance		Susceptible	Susceptible		Susceptible		Susceptible		Susceptible	Susceptible	Susceptible	Susceptible		Susceptible	Susceptible GSS 1.5		Susceptible GSS 1.5		Susceptible GSS 1.5		Susceptible GSS 1.5	Susceptible GSS 1.5	Susceptible GSS 1	Susceptible GSS 1.5		Susceptible GSS 1.5
xaa_108 148037_Q61Q_L63K_I72E	Susceptible	Susceptible	Susceptible	Susceptible	Susceptible			Susceptible		Susceptible	Susceptible	Susceptible	Susceptible		Possible resistance		Susceptible	Susceptible	Susceptible	Susceptible	Susceptible	Possible resistance		Susceptible	Susceptible		Susceptible		Susceptible		Susceptible	Susceptible	Susceptible	Susceptible		Susceptible	Susceptible GSS 1.5		Susceptible GSS 1.5		Susceptible GSS 1.5		Susceptible GSS 1.5	Susceptible GSS 1.5	Susceptible GSS 1	Susceptible GSS 1.5		Susceptible GSS 1.5
xaa_109 148037_Q61Q_L63K_I72V	Susceptible	Susceptible	Susceptible	Susceptible	Susceptible			Susceptible		Susceptible	Susceptible	Susceptible	Susceptible		Possible resistance		Susceptible	Susceptible	Susceptible	Susceptible	Susceptible	Possible resistance		Susceptible	Susceptible		Susceptible		Susceptible		Susceptible	Susceptible	Susceptible	Susceptible		Susceptible	Susceptible GSS 1.5		Susceptible GSS 1.5		Susceptible GSS 1.5		Susceptible GSS 1.5	Susceptible GSS 1.5	Susceptible GSS 1	Susceptible GSS 1.5		Susceptible GSS 1.5
xaa_110 148037_Q61Q_L63Q_I72E	Susceptible	Susceptible	Susceptible	Susceptible	Susceptible			Susceptible		Susceptible	Susceptible	Susceptible	Susceptible		Possible resistance		Susceptible	Susceptible	Susceptible	Susceptible	Susceptible	Possible resistance		Susceptible	Susceptible		Susceptible		Susceptible		Susceptible	Susceptible	Susceptible	Susceptible		Susceptible	Susceptible GSS 1.5		Susceptible GSS 1.5		Susceptible GSS 1.5		Susceptible GSS 1.5	Susceptible GSS 1.5	Susceptible GSS 1	Susceptible GSS 1.5		Susceptible GSS 1.5
xaa_111 148037_Q61Q_L63Q_I72V	Susceptible	Susceptible	Susceptible	Susceptible	Susceptible			Susceptible		Susceptible	Susceptible	Susceptible	Susceptible		Possible resistance		Susceptible	Susceptible	Susceptible	Susceptible	Susceptible	Possible resistance		Susceptible	Susceptible		Susceptible		Susceptible		Susceptible	Susceptible	Susceptible	Susceptible		Susceptible	Susceptible GSS 1.5		Susceptible GSS 1.5		Susceptible GSS 1.5		Susceptible GSS 1.5	Susceptible GSS 1.5	Susceptible GSS 1	Susceptible GSS 1.5		Susceptible GSS 1.5
xaa_112 148043_K20I_A71A_L90L_I93I	Susceptible	Susceptible	Susceptible	Susceptible	Susceptible			Susceptible		Susceptible	Susceptible	Susceptible	Susceptible		Susceptible		Susceptible	Susceptible	Susceptible	Susceptible	Susceptible	Susceptible		Susceptible	Susceptible		Susceptible		Susceptible		Susceptible	Susceptible	Susceptible	Susceptible		Susceptible	Susceptible GSS 1.5		Susceptible GSS 1.5		Susceptible GSS 1.5		Susceptible GSS 1.5	Susceptible GSS 1.5	Susceptible GSS 1	Susceptible GSS 1.5		Susceptible GSS 1.5
xaa_113 148043_K20I_A71A_L90L_I93L	Susceptible	Susceptible	Susceptible	Susceptible	Susceptible			Susceptible		Susceptible	Susceptible	Susceptible	Susceptible		Susceptible		Susceptible	Susceptible	Susceptible	Susceptible	Susceptible	Susceptible		Susceptible	Susceptible		Susceptible		Susceptible		Susceptible	Susceptible	Susceptible	Susceptible		Susceptible	Susceptible GSS 1.5		Susceptible GSS 1.5		Susceptible GSS 1.5		Susceptible GSS 1.5	Susceptible GSS 1.5	Susceptible GSS 1	Susceptible GSS 1.5		Susceptible GSS 1.5
xaa_114 148043_K20I_A71A_L90M_I93I	Susceptible	Intermediate	flagged mutations	flagged mutations	Susceptible			Susceptible		flagged mutations	flagged mutations	Susceptible	Susceptible		Susceptible		Susceptible	Susceptible	Possible resistance	Susceptible	Resistance	Possible resistance		Susceptible	Low-Level Resistance		Low-Level Resistance		Susceptible		Intermediate Resistance	Low-Level Resistance	High-Level Resistance	Intermediate Resistance		Susceptible	Susceptible GSS 1.5		Susceptible GSS 1.5		Susceptible GSS 1.5		Susceptible GSS 1.5	Susceptible GSS 1.5	Resistant GSS 0	Intermediate Resistant GSS 0.75		Susceptible GSS 1.5
xaa_115 148043_K20I_A71A_L90M_I93L	Susceptible	Intermediate	flagged mutations	flagged mutations	Susceptible			Susceptible		flagged mutations	flagged mutations	Susceptible	Susceptible		Susceptible		Susceptible	Susceptible	Possible resistance	Susceptible	Resistance	Possible resistance		Susceptible	Low-Level Resistance		Low-Level Resistance		Susceptible		Intermediate Resistance	Low-Level Resistance	High-Level Resistance	Intermediate Resistance		Susceptible	Susceptible GSS 1.5		Susceptible GSS 1.5		Susceptible GSS 1.5		Susceptible GSS 1.5	Susceptible GSS 1.5	Resistant GSS 0	Intermediate Resistant GSS 0.75		Susceptible GSS 1.5
xaa_116 148043_K20I_A71V_L90L_I93I	Susceptible	Susceptible	Susceptible	Susceptible	Susceptible			Susceptible		Susceptible	Susceptible	Susceptible	Susceptible		Susceptible		Susceptible	Susceptible	Susceptible	Susceptible	Susceptible	Susceptible		Susceptible	Susceptible		Susceptible		Susceptible		Susceptible	Susceptible	Susceptible	Susceptible		Susceptible	Susceptible GSS 1.5		Susceptible GSS 1.5		Susceptible GSS 1.5		Susceptible GSS 1.5	Susceptible GSS 1.5	Susceptible GSS 1	Susceptible GSS 1.5		Susceptible GSS 1.5
xaa_117 148043_K20I_A71V_L90M_I93I	Susceptible	Intermediate	flagged mutations	flagged mutations	Susceptible			Susceptible		flagged mutations	flagged mutations	Susceptible	Susceptible		Possible resistance		Susceptible	Susceptible	Resistance	Susceptible	Resistance	Possible resistance		Susceptible	Low-Level Resistance		Low-Level Resistance		Susceptible		Intermediate Resistance	Low-Level Resistance	High-Level Resistance	Intermediate Resistance		Susceptible	Susceptible GSS 1.5		Susceptible GSS 1.5		Susceptible GSS 1.5		Susceptible GSS 1.5	Susceptible GSS 1.5	Resistant GSS 0	Intermediate Resistant GSS 0.75		Susceptible GSS 1.5
xaa_118 148043_K20K_A71A_L90L_I93I	Susceptible	Susceptible	Susceptible	Susceptible	Susceptible			Susceptible		Susceptible	Susceptible	Susceptible	Susceptible		Susceptible		Susceptible	Susceptible	Susceptible	Susceptible	Susceptible	Susceptible		Susceptible	Susceptible		Susceptible		Susceptible		Susceptible	Susceptible	Susceptible	Susceptible		Susceptible	Susceptible GSS 1.5		Susceptible GSS 1.5		Susceptible GSS 1.5		Susceptible GSS 1.5	Susceptible GSS 1.5	Susceptible GSS 1	Susceptible GSS 1.5		Susceptible GSS 1.5
xaa_119 148043_K20K_A71A_L90L_I93L	Susceptible	Susceptible	Susceptible	Susceptible	Susceptible			Susceptible		Susceptible	Susceptible	Susceptible	Susceptible		Susceptible		Susceptible	Susceptible	Susceptible	Susceptible	Susceptible	Susceptible		Susceptible	Susceptible		Susceptible		Susceptible		Susceptible	Susceptible	Susceptible	Susceptible		Susceptible	Susceptible GSS 1.5		Susceptible GSS 1.5		Susceptible GSS 1.5		Susceptible GSS 1.5	Susceptible GSS 1.5	Susceptible GSS 1	Susceptible GSS 1.5		Susceptible GSS 1.5
xaa_120 148043_K20K_A71A_L90M_I93I	Susceptible	Intermediate	flagged mutations	flagged mutations	Susceptible			Susceptible		flagged mutations	flagged mutations	Susceptible	Susceptible		Susceptible		Susceptible	Susceptible	Possible resistance	Susceptible	Resistance	Susceptible		Susceptible	Low-Level Resistance		Low-Level Resistance		Susceptible		Intermediate Resistance	Low-Level Resistance	High-Level Resistance	Intermediate Resistance		Susceptible	Susceptible GSS 1.5		Susceptible GSS 1.5		Susceptible GSS 1.5		Susceptible GSS 1.5	Susceptible GSS 1.5	Resistant GSS 0	Intermediate Resistant GSS 0.75		Susceptible GSS 1.5
xaa_121 148043_K20K_A71A_L90M_I93L	Susceptible	Intermediate	flagged mutations	flagged mutations	Susceptible			Susceptible		flagged mutations	flagged mutations	Susceptible	Susceptible		Susceptible		Susceptible	Susceptible	Possible resistance	Susceptible	Resistance	Susceptible		Susceptible	Low-Level Resistance		Low-Level Resistance		Susceptible		Intermediate Resistance	Low-Level Resistance	High-Level Resistance	Intermediate Resistance		Susceptible	Susceptible GSS 1.5		Susceptible GSS 1.5		Susceptible GSS 1.5		Susceptible GSS 1.5	Susceptible GSS 1.5	Resistant GSS 0	Intermediate Resistant GSS 0.75		Susceptible GSS 1.5
xaa_122 148043_K20K_A71V_L90L_I93I	Susceptible	Susceptible	Susceptible	Susceptible	Susceptible			Susceptible		Susceptible	Susceptible	Susceptible	Susceptible		Susceptible		Susceptible	Susceptible	Susceptible	Susceptible	Susceptible	Susceptible		Susceptible	Susceptible		Susceptible		Susceptible		Susceptible	Susceptible	Susceptible	Susceptible		Susceptible	Susceptible GSS 1.5		Susceptible GSS 1.5		Susceptible GSS 1.5		Susceptible GSS 1.5	Susceptible GSS 1.5	Susceptible GSS 1	Susceptible GSS 1.5		Susceptible GSS 1.5
xaa_123 148043_K20K_A71V_L90L_I93L	Susceptible	Susceptible	Susceptible	Susceptible	Susceptible			Susceptible		Susceptible	Susceptible	Susceptible	Susceptible		Susceptible		Susceptible	Susceptible	Susceptible	Susceptible	Susceptible	Susceptible		Susceptible	Susceptible		Susceptible		Susceptible		Susceptible	Susceptible	Susceptible	Susceptible		Susceptible	Susceptible GSS 1.5		Susceptible GSS 1.5		Susceptible GSS 1.5		Susceptible GSS 1.5	Susceptible GSS 1.5	Susceptible GSS 1	Susceptible GSS 1.5		Susceptible GSS 1.5
xaa_124 148049_L19T_M36I	Susceptible	Susceptible	Susceptible	Susceptible	Susceptible			Susceptible		Susceptible	Susceptible	Susceptible	Susceptible		Susceptible		Susceptible	Susceptible	Susceptible	Susceptible	Susceptible	Possible resistance		Susceptible	Susceptible		Susceptible		Susceptible		Susceptible	Susceptible	Susceptible	Susceptible		Susceptible	Susceptible GSS 1.5		Susceptible GSS 1.5		Susceptible GSS 1.5		Susceptible GSS 1.5	Susceptible GSS 1.5	Susceptible GSS 1	Susceptible GSS 1.5		Susceptible GSS 1.5
xaa_125 148049_L19T_M36L	Susceptible	Susceptible	Susceptible	Susceptible	Susceptible			Susceptible		Susceptible	Susceptible	Susceptible	Susceptible		Susceptible		Susceptible	Susceptible	Susceptible	Susceptible	Susceptible	Possible resistance		Susceptible	Susceptible		Susceptible		Susceptible		Susceptible	Susceptible	Susceptible	Susceptible		Susceptible	Susceptible GSS 1.5		Susceptible GSS 1.5		Susceptible GSS 1.5		Susceptible GSS 1.5	Susceptible GSS 1.5	Susceptible GSS 1	Susceptible GSS 1.5		Susceptible GSS 1.5
xaa_126 148049_L19T_M36M	Susceptible	Susceptible	Susceptible	Susceptible	Susceptible			Susceptible		Susceptible	Susceptible	Susceptible	Susceptible		Susceptible		Susceptible	Susceptible	Susceptible	Susceptible	Susceptible	Possible resistance		Susceptible	Susceptible		Susceptible		Susceptible		Susceptible	Susceptible	Susceptible	Susceptible		Susceptible	Susceptible GSS 1.5		Susceptible GSS 1.5		Susceptible GSS 1.5		Susceptible GSS 1.5	Susceptible GSS 1.5	Susceptible GSS 1	Susceptible GSS 1.5		Susceptible GSS 1.5
xaa_127 148059	Susceptible	Susceptible	Susceptible	Susceptible	Susceptible			Susceptible		Susceptible	Susceptible	Susceptible	Susceptible		Susceptible		Susceptible	Susceptible	Susceptible	Susceptible	Susceptible	Susceptible		Susceptible	Susceptible		Susceptible		Susceptible		Susceptible	Susceptible	Susceptible	Susceptible		Susceptible	Susceptible GSS 1.5		Susceptible GSS 1.5		Susceptible GSS 1.5		Susceptible GSS 1.5	Susceptible GSS 1.5	Susceptible GSS 1	Susceptible GSS 1.5		Susceptible GSS 1.5
xaa_128 148063_I62I_L63A_I64I_H69H_K70K_A71A	Susceptible	Susceptible	Susceptible	Susceptible	Susceptible			Susceptible		Susceptible	Susceptible	Susceptible	Susceptible		Susceptible		Susceptible	Susceptible	Susceptible	Susceptible	Susceptible	Susceptible		Susceptible	Susceptible		Susceptible		Susceptible		Susceptible	Susceptible	Susceptible	Susceptible		Susceptible	Susceptible GSS 1.5		Susceptible GSS 1.5		Susceptible GSS 1.5		Susceptible GSS 1.5	Susceptible GSS 1.5	Susceptible GSS 1	Susceptible GSS 1.5		Susceptible GSS 1.5
xaa_129 148063_I62I_L63A_I64I_H69H_K70K_A71T	Susceptible	Susceptible	Susceptible	Susceptible	Susceptible			Susceptible		Susceptible	Susceptible	Susceptible	Susceptible		Susceptible		Susceptible	Susceptible	Susceptible	Susceptible	Susceptible	Susceptible		Susceptible	Susceptible		Susceptible		Susceptible		Susceptible	Susceptible	Susceptible	Susceptible		Susceptible	Susceptible GSS 1.5		Susceptible GSS 1.5		Susceptible GSS 1.5		Susceptible GSS 1.5	Susceptible GSS 1.5	Susceptible GSS 1	Susceptible GSS 1.5		Susceptible GSS 1.5
xaa_130 148063_I62I_L63A_I64I_H69H_K70R_A71A	Susceptible	Susceptible	Susceptible	Susceptible	Susceptible			Susceptible		Susceptible	Susceptible	Susceptible	Susceptible		Susceptible		Susceptible	Susceptible	Susceptible	Susceptible	Susceptible	Susceptible		Susceptible	Susceptible		Susceptible		Susceptible		Susceptible	Susceptible	Susceptible	Susceptible		Susceptible	Susceptible GSS 1.5		Susceptible GSS 1.5		Susceptible GSS 1.5		Susceptible GSS 1.5	Susceptible GSS 1.5	Susceptible GSS 1	Susceptible GSS 1.5		Susceptible GSS 1.5
xaa_131 148063_I62I_L63A_I64M_H69Y_K70K_A71A	Susceptible	Susceptible	Susceptible	Susceptible	Susceptible			Susceptible		Susceptible	Susceptible	Susceptible	Susceptible		Susceptible		Susceptible	Susceptible	Susceptible	Susceptible	Susceptible	Susceptible		Susceptible	Susceptible		Susceptible		Susceptible		Susceptible	Susceptible	Susceptible	Susceptible		Susceptible	Susceptible GSS 1.5		Susceptible GSS 1.5		Susceptible GSS 1.5		Susceptible GSS 1.5	Susceptible GSS 1.5	Susceptible GSS 1	Susceptible GSS 1.5		Susceptible GSS 1.5
xaa_132 148063_I62I_L63P_I64M_H69H_K70K_A71A	Susceptible	Susceptible	Susceptible	Susceptible	Susceptible			Susceptible		Susceptible	Susceptible	Susceptible	Susceptible		Susceptible		Susceptible	Susceptible	Susceptible	Susceptible	Susceptible	Susceptible		Susceptible	Susceptible		Susceptible		Susceptible		Susceptible	Susceptible	Susceptible	Susceptible		Susceptible	Susceptible GSS 1.5		Susceptible GSS 1.5		Susceptible GSS 1.5		Susceptible GSS 1.5	Susceptible GSS 1.5	Susceptible GSS 1	Susceptible GSS 1.5		Susceptible GSS 1.5
xaa_133 148063_I62V_L63A_I64I_H69H_K70K_A71A	Susceptible	Susceptible	Susceptible	Susceptible	Susceptible			Susceptible		Susceptible	Susceptible	Susceptible	Susceptible		Susceptible		Susceptible	Susceptible	Susceptible	Susceptible	Susceptible	Susceptible		Susceptible	Susceptible		Susceptible		Susceptible		Susceptible	Susceptible	Susceptible	Susceptible		Susceptible	Susceptible GSS 1.5		Susceptible GSS 1.5		Susceptible GSS 1.5		Susceptible GSS 1.5	Susceptible GSS 1.5	Susceptible GSS 1	Susceptible GSS 1.5		Susceptible GSS 1.5
xaa_134 148063_I62V_L63A_I64I_H69H_K70K_A71T	Susceptible	Susceptible	Susceptible	Susceptible	Susceptible			Susceptible		Susceptible	Susceptible	Susceptible	Susceptible		Susceptible		Susceptible	Susceptible	Susceptible	Susceptible	Susceptible	Susceptible		Susceptible	Susceptible		Susceptible		Susceptible		Susceptible	Susceptible	Susceptible	Susceptible		Susceptible	Susceptible GSS 1.5		Susceptible GSS 1.5		Susceptible GSS 1.5		Susceptible GSS 1.5	Susceptible GSS 1.5	Susceptible GSS 1	Susceptible GSS 1.5		Susceptible GSS 1.5
xaa_135 148063_I62V_L63A_I64M_H69Y_K70K_A71A	Susceptible	Susceptible	Susceptible	Susceptible	Susceptible			Susceptible		Susceptible	Susceptible	Susceptible	Susceptible		Susceptible		Susceptible	Susceptible	Susceptible	Susceptible	Susceptible	Susceptible		Susceptible	Susceptible		Susceptible		Susceptible		Susceptible	Susceptible	Susceptible	Susceptible		Susceptible	Susceptible GSS 1.5		Susceptible GSS 1.5		Susceptible GSS 1.5		Susceptible GSS 1.5	Susceptible GSS 1.5	Susceptible GSS 1	Susceptible GSS 1.5		Susceptible GSS 1.5
xaa_136 148063_I62V_L63P_I64I_H69H_K70K_A71A	Susceptible	Susceptible	Susceptible	Susceptible	Susceptible			Susceptible		Susceptible	Susceptible	Susceptible	Susceptible		Susceptible		Susceptible	Susceptible	Susceptible	Susceptible	Susceptible	Susceptible		Susceptible	Susceptible		Susceptible		Susceptible		Susceptible	Susceptible	Susceptible	Susceptible		Susceptible	Susceptible GSS 1.5		Susceptible GSS 1.5		Susceptible GSS 1.5		Susceptible GSS 1.5	Susceptible GSS 1.5	Susceptible GSS 1	Susceptible GSS 1.5		Susceptible GSS 1.5
xaa_137 148071	Susceptible	Susceptible	Susceptible	Susceptible	Susceptible			Susceptible		Susceptible	Susceptible	Susceptible	Susceptible		Susceptible		Susceptible	Susceptible	Susceptible	Susceptible	Susceptible	Susceptible		Susceptible	Susceptible		Susceptible		Susceptible		Susceptible	Susceptible	Susceptible	Susceptible		Susceptible	Susceptible GSS 1.5		Susceptible GSS 1.5		Susceptible GSS 1.5		Susceptible GSS 1.5	Susceptible GSS 1.5	Susceptible GSS 1	Susceptible GSS 1.5		Susceptible GSS 1.5
xaa_138 148073_I3I_I13I_C67C	Susceptible	Susceptible	Susceptible	Susceptible	Susceptible			Susceptible		Susceptible	Susceptible	Susceptible	Susceptible		Susceptible		Susceptible	Susceptible	Susceptible	Susceptible	Susceptible	Susceptible		Susceptible	Susceptible		Susceptible		Susceptible		Susceptible	Susceptible	Susceptible	Susceptible		Susceptible	Susceptible GSS 1.5		Susceptible GSS 1.5		Susceptible GSS 1.5		Susceptible GSS 1.5	Susceptible GSS 1.5	Susceptible GSS 1	Susceptible GSS 1.5		Susceptible GSS 1.5
xaa_139 148073_I3I_I13I_C67G	Susceptible	Susceptible	Susceptible	Susceptible	Susceptible			Susceptible		Susceptible	Susceptible	Susceptible	Susceptible		Susceptible		Susceptible	Susceptible	Susceptible	Susceptible	Susceptible	Susceptible		Susceptible	Susceptible		Susceptible		Susceptible		Susceptible	Susceptible	Susceptible	Susceptible		Susceptible	Susceptible GSS 1.5		Susceptible GSS 1.5		Susceptible GSS 1.5		Susceptible GSS 1.5	Susceptible GSS 1.5	Susceptible GSS 1	Susceptible GSS 1.5		Susceptible GSS 1.5
xaa_140 148073_I3V_I13I_C67C	Susceptible	Susceptible	Susceptible	Susceptible	Susceptible			Susceptible		Susceptible	Susceptible	Susceptible	Susceptible		Susceptible		Susceptible	Susceptible	Susceptible	Susceptible	Susceptible	Susceptible		Susceptible	Susceptible		Susceptible		Susceptible		Susceptible	Susceptible	Susceptible	Susceptible		Susceptible	Susceptible GSS 1.5		Susceptible GSS 1.5		Susceptible GSS 1.5		Susceptible GSS 1.5	Susceptible GSS 1.5	Susceptible GSS 1	Susceptible GSS 1.5		Susceptible GSS 1.5
xaa_141 148073_I3V_I13I_C67G	Susceptible	Susceptible	Susceptible	Susceptible	Susceptible			Susceptible		Susceptible	Susceptible	Susceptible	Susceptible		Susceptible		Susceptible	Susceptible	Susceptible	Susceptible	Susceptible	Susceptible		Susceptible	Susceptible		Susceptible		Susceptible		Susceptible	Susceptible	Susceptible	Susceptible		Susceptible	Susceptible GSS 1.5		Susceptible GSS 1.5		Susceptible GSS 1.5		Susceptible GSS 1.5	Susceptible GSS 1.5	Susceptible GSS 1	Susceptible GSS 1.5		Susceptible GSS 1.5
xaa_142 148073_I3V_I13V_C67C	Susceptible	Susceptible	Susceptible	Susceptible	Susceptible			Susceptible		Susceptible	Susceptible	Susceptible	Susceptible		Susceptible		Susceptible	Susceptible	Susceptible	Susceptible	Susceptible	Susceptible		Susceptible	Susceptible		Susceptible		Susceptible		Susceptible	Susceptible	Susceptible	Susceptible		Susceptible	Susceptible GSS 1.5		Susceptible GSS 1.5		Susceptible GSS 1.5		Susceptible GSS 1.5	Susceptible GSS 1.5	Susceptible GSS 1	Susceptible GSS 1.5		Susceptible GSS 1.5
xaa_143 148073_I3V_I13V_C67G	Susceptible	Susceptible	Susceptible	Susceptible	Susceptible			Susceptible		Susceptible	Susceptible	Susceptible	Susceptible		Susceptible		Susceptible	Susceptible	Susceptible	Susceptible	Susceptible	Susceptible		Susceptible	Susceptible		Susceptible		Susceptible		Susceptible	Susceptible	Susceptible	Susceptible		Susceptible	Susceptible GSS 1.5		Susceptible GSS 1.5		Susceptible GSS 1.5		Susceptible GSS 1.5	Susceptible GSS 1.5	Susceptible GSS 1	Susceptible GSS 1.5		Susceptible GSS 1.5
xaa_144 148077	Susceptible	Susceptible	Susceptible	Susceptible	Susceptible			Susceptible		Susceptible	Susceptible	Susceptible	Susceptible		Susceptible		Susceptible	Susceptible	Susceptible	Susceptible	Susceptible	Susceptible		Susceptible	Susceptible		Susceptible		Susceptible		Susceptible	Susceptible	Susceptible	Susceptible		Susceptible	Susceptible GSS 1.5		Susceptible GSS 1.5		Susceptible GSS 1.5		Susceptible GSS 1.5	Susceptible GSS 1.5	Susceptible GSS 1	Susceptible GSS 1.5		Susceptible GSS 1.5
xaa_145 148081_K14K_I15V_I64I	Susceptible	Susceptible	Susceptible	Susceptible	Susceptible			Susceptible		Susceptible	Susceptible	Susceptible	Susceptible		Susceptible		Susceptible	Susceptible	Susceptible	Susceptible	Susceptible	Susceptible		Susceptible	Susceptible		Susceptible		Susceptible		Susceptible	Susceptible	Susceptible	Susceptible		Susceptible	Susceptible GSS 1.5		Susceptible GSS 1.5		Susceptible GSS 1.5		Susceptible GSS 1.5	Susceptible GSS 1.5	Susceptible GSS 1	Susceptible GSS 1.5		Susceptible GSS 1.5
xaa_146 148081_K14R_I15I_I64I	Susceptible	Susceptible	Susceptible	Susceptible	Susceptible			Susceptible		Susceptible	Susceptible	Susceptible	Susceptible		Susceptible		Susceptible	Susceptible	Susceptible	Susceptible	Susceptible	Susceptible		Susceptible	Susceptible		Susceptible		Susceptible		Susceptible	Susceptible	Susceptible	Susceptible		Susceptible	Susceptible GSS 1.5		Susceptible GSS 1.5		Susceptible GSS 1.5		Susceptible GSS 1.5	Susceptible GSS 1.5	Susceptible GSS 1	Susceptible GSS 1.5		Susceptible GSS 1.5
xaa_147 148081_K14R_I15V_I64I	Susceptible	Susceptible	Susceptible	Susceptible	Susceptible			Susceptible		Susceptible	Susceptible	Susceptible	Susceptible		Susceptible		Susceptible	Susceptible	Susceptible	Susceptible	Susceptible	Susceptible		Susceptible	Susceptible		Susceptible		Susceptible		Susceptible	Susceptible	Susceptible	Susceptible		Susceptible	Susceptible GSS 1.5		Susceptible GSS 1.5		Susceptible GSS 1.5		Susceptible GSS 1.5	Susceptible GSS 1.5	Susceptible GSS 1	Susceptible GSS 1.5		Susceptible GSS 1.5
xaa_148 148081_K14R_I15V_I64V	Susceptible	Susceptible	Susceptible	Susceptible	Susceptible			Susceptible		Susceptible	Susceptible	Susceptible	Susceptible		Susceptible		Susceptible	Susceptible	Susceptible	Susceptible	Susceptible	Susceptible		Susceptible	Susceptible		Susceptible		Susceptible		Susceptible	Susceptible	Susceptible	Susceptible		Susceptible	Susceptible GSS 1.5		Susceptible GSS 1.5		Susceptible GSS 1.5		Susceptible GSS 1.5	Susceptible GSS 1.5	Susceptible GSS 1	Susceptible GSS 1.5		Susceptible GSS 1.5
xaa_149 148083_I13I_I15V_K20E	Susceptible	Susceptible	Susceptible	Susceptible	Susceptible			Susceptible		Susceptible	Susceptible	Susceptible	Susceptible		Susceptible		Susceptible	Susceptible	Susceptible	Susceptible	Susceptible	Susceptible		Susceptible	Susceptible		Susceptible		Susceptible		Susceptible	Susceptible	Susceptible	Susceptible		Susceptible	Susceptible GSS 1.5		Susceptible GSS 1.5		Susceptible GSS 1.5		Susceptible GSS 1.5	Susceptible GSS 1.5	Susceptible GSS 1	Susceptible GSS 1.5		Susceptible GSS 1.5
xaa_150 148083_I13I_I15V_K20K	Susceptible	Susceptible	Susceptible	Susceptible	Susceptible			Susceptible		Susceptible	Susceptible	Susceptible	Susceptible		Susceptible		Susceptible	Susceptible	Susceptible	Susceptible	Susceptible	Susceptible		Susceptible	Susceptible		Susceptible		Susceptible		Susceptible	Susceptible	Susceptible	Susceptible		Susceptible	Susceptible GSS 1.5		Susceptible GSS 1.5		Susceptible GSS 1.5		Susceptible GSS 1.5	Susceptible GSS 1.5	Susceptible GSS 1	Susceptible GSS 1.5		Susceptible GSS 1.5
xaa_151 148083_I13I_I15V_K20M	Susceptible	Susceptible	Susceptible	Susceptible	Susceptible			Susceptible		Susceptible	Susceptible	Susceptible	Susceptible		Susceptible		Susceptible	Susceptible	Susceptible	Susceptible	Susceptible	Possible resistance		Susceptible	Susceptible		Susceptible		Susceptible		Susceptible	Susceptible	Susceptible	Susceptible		Susceptible	Susceptible GSS 1.5		Susceptible GSS 1.5		Susceptible GSS 1.5		Susceptible GSS 1.5	Susceptible GSS 1.5	Susceptible GSS 1	Susceptible GSS 1.5		Susceptible GSS 1.5
xaa_152 148083_I13I_I15V_K20V	Susceptible	Susceptible	Susceptible	Susceptible	Susceptible			Susceptible		Susceptible	Susceptible	Susceptible	Susceptible		Susceptible		Susceptible	Susceptible	Susceptible	Susceptible	Susceptible	Susceptible		Susceptible	Susceptible		Susceptible		Susceptible		Susceptible	Susceptible	Susceptible	Susceptible		Susceptible	Susceptible GSS 1.5		Susceptible GSS 1.5		Susceptible GSS 1.5		Susceptible GSS 1.5	Susceptible GSS 1.5	Susceptible GSS 1	Susceptible GSS 1.5		Susceptible GSS 1.5
xaa_153 148087_L63P_V77I	Susceptible	Susceptible	Susceptible	Susceptible	Susceptible			Susceptible		Susceptible	Susceptible	Susceptible	Susceptible		Susceptible		Susceptible	Susceptible	Susceptible	Susceptible	Susceptible	Susceptible		Susceptible	Susceptible		Susceptible		Susceptible		Susceptible	Susceptible	Susceptible	Susceptible		Susceptible	Susceptible GSS 1.5		Susceptible GSS 1.5		Susceptible GSS 1.5		Susceptible GSS 1.5	Susceptible GSS 1.5	Susceptible GSS 1	Susceptible GSS 1.5		Susceptible GSS 1.5
xaa_154 148087_L63P_V77V	Susceptible	Susceptible	Susceptible	Susceptible	Susceptible			Susceptible		Susceptible	Susceptible	Susceptible	Susceptible		Susceptible		Susceptible	Susceptible	Susceptible	Susceptible	Susceptible	Susceptible		Susceptible	Susceptible		Susceptible		Susceptible		Susceptible	Susceptible	Susceptible	Susceptible		Susceptible	Susceptible GSS 1.5		Susceptible GSS 1.5		Susceptible GSS 1.5		Susceptible GSS 1.5	Susceptible GSS 1.5	Susceptible GSS 1	Susceptible GSS 1.5		Susceptible GSS 1.5
xaa_155 148087_L63S_V77I	Susceptible	Susceptible	Susceptible	Susceptible	Susceptible			Susceptible		Susceptible	Susceptible	Susceptible	Susceptible		Susceptible		Susceptible	Susceptible	Susceptible	Susceptible	Susceptible	Susceptible		Susceptible	Susceptible		Susceptible		Susceptible		Susceptible	Susceptible	Susceptible	Susceptible		Susceptible	Susceptible GSS 1.5		Susceptible GSS 1.5		Susceptible GSS 1.5		Susceptible GSS 1.5	Susceptible GSS 1.5	Susceptible GSS 1	Susceptible GSS 1.5		Susceptible GSS 1.5
xaa_156 148087_L63S_V77V	Susceptible	Susceptible	Susceptible	Susceptible	Susceptible			Susceptible		Susceptible	Susceptible	Susceptible	Susceptible		Susceptible		Susceptible	Susceptible	Susceptible	Susceptible	Susceptible	Susceptible		Susceptible	Susceptible		Susceptible		Susceptible		Susceptible	Susceptible	Susceptible	Susceptible		Susceptible	Susceptible GSS 1.5		Susceptible GSS 1.5		Susceptible GSS 1.5		Susceptible GSS 1.5	Susceptible GSS 1.5	Susceptible GSS 1	Susceptible GSS 1.5		Susceptible GSS 1.5
xaa_157 148093_L10L_K14K_I64V	Susceptible	Susceptible	Susceptible	Susceptible	Susceptible			Susceptible		Susceptible	Susceptible	Susceptible	Susceptible		Susceptible		Susceptible	Susceptible	Susceptible	Susceptible	Susceptible	Susceptible		Susceptible	Susceptible		Susceptible		Susceptible		Susceptible	Susceptible	Susceptible	Susceptible		Susceptible	Susceptible GSS 1.5		Susceptible GSS 1.5		Susceptible GSS 1.5		Susceptible GSS 1.5	Susceptible GSS 1.5	Susceptible GSS 1	Susceptible GSS 1.5		Susceptible GSS 1.5
xaa_158 148093_L10L_K14R_I64I	Susceptible	Susceptible	Susceptible	Susceptible	Susceptible			Susceptible		Susceptible	Susceptible	Susceptible	Susceptible		Susceptible		Susceptible	Susceptible	Susceptible	Susceptible	Susceptible	Susceptible		Susceptible	Susceptible		Susceptible		Susceptible		Susceptible	Susceptible	Susceptible	Susceptible		Susceptible	Susceptible GSS 1.5		Susceptible GSS 1.5		Susceptible GSS 1.5		Susceptible GSS 1.5	Susceptible GSS 1.5	Susceptible GSS 1	Susceptible GSS 1.5		Susceptible GSS 1.5
xaa_159 148093_L10L_K14R_I64V	Susceptible	Susceptible	Susceptible	Susceptible	Susceptible			Susceptible		Susceptible	Susceptible	Susceptible	Susceptible		Susceptible		Susceptible	Susceptible	Susceptible	Susceptible	Susceptible	Susceptible		Susceptible	Susceptible		Susceptible		Susceptible		Susceptible	Susceptible	Susceptible	Susceptible		Susceptible	Susceptible GSS 1.5		Susceptible GSS 1.5		Susceptible GSS 1.5		Susceptible GSS 1.5	Susceptible GSS 1.5	Susceptible GSS 1	Susceptible GSS 1.5		Susceptible GSS 1.5
xaa_160 148099_I13I_N37N	Susceptible	Susceptible	Susceptible	Susceptible	Susceptible			Susceptible		Susceptible	Susceptible	Susceptible	Susceptible		Susceptible		Susceptible	Susceptible	Susceptible	Susceptible	Susceptible	Susceptible		Susceptible	Susceptible		Susceptible		Susceptible		Susceptible	Susceptible	Susceptible	Susceptible		Susceptible	Susceptible GSS 1.5		Susceptible GSS 1.5		Susceptible GSS 1.5		Susceptible GSS 1.5	Susceptible GSS 1.5	Susceptible GSS 1	Susceptible GSS 1.5		Susceptible GSS 1.5
xaa_161 148099_I13I_N37S	Susceptible	Susceptible	Susceptible	Susceptible	Susceptible			Susceptible		Susceptible	Susceptible	Susceptible	Susceptible		Susceptible		Susceptible	Susceptible	Susceptible	Susceptible	Susceptible	Susceptible		Susceptible	Susceptible		Susceptible		Susceptible		Susceptible	Susceptible	Susceptible	Susceptible		Susceptible	Susceptible GSS 1.5		Susceptible GSS 1.5		Susceptible GSS 1.5		Susceptible GSS 1.5	Susceptible GSS 1.5	Susceptible GSS 1	Susceptible GSS 1.5		Susceptible GSS 1.5
xaa_162 148119_K20K_I72M	Susceptible	Susceptible	Susceptible	Susceptible	Susceptible			Susceptible		Susceptible	Susceptible	Susceptible	Susceptible		Susceptible		Susceptible	Susceptible	Susceptible	Susceptible	Susceptible	Susceptible		Susceptible	Susceptible		Susceptible		Susceptible		Susceptible	Susceptible	Susceptible	Susceptible		Susceptible	Susceptible GSS 1.5		Susceptible GSS 1.5		Susceptible GSS 1.5		Susceptible GSS 1.5	Susceptible GSS 1.5	Susceptible GSS 1	Susceptible GSS 1.5		Susceptible GSS 1.5
xaa_163 148121	Susceptible	Susceptible	Susceptible	Susceptible	Susceptible			Susceptible		Susceptible	Susceptible	Susceptible	Susceptible		Susceptible		Susceptible	Susceptible	Susceptible	Susceptible	Susceptible	Susceptible		Susceptible	Susceptible		Susceptible		Susceptible		Susceptible	Susceptible	Susceptible	Susceptible		Susceptible	Susceptible GSS 1.5		Susceptible GSS 1.5		Susceptible GSS 1.5		Susceptible GSS 1.5	Susceptible GSS 1.5	Susceptible GSS 1	Susceptible GSS 1.5		Susceptible GSS 1.5
xaa_164 148131	Susceptible	Susceptible	Susceptible	Susceptible	Susceptible			Susceptible		Susceptible	Susceptible	Susceptible	Susceptible		Susceptible		Susceptible	Susceptible	Susceptible	Susceptible	Susceptible	Susceptible		Susceptible	Susceptible		Susceptible		Susceptible		Susceptible	Susceptible	Susceptible	Susceptible		Susceptible	Susceptible GSS 1.5		Susceptible GSS 1.5		Susceptible GSS 1.5		Susceptible GSS 1.5	Susceptible GSS 1.5	Susceptible GSS 1	Susceptible GSS 1.5		Susceptible GSS 1.5
xaa_165 172134	Susceptible	Susceptible	Susceptible	Susceptible	Susceptible			Susceptible		Susceptible	Susceptible	Susceptible	Susceptible		Susceptible		Susceptible	Susceptible	Susceptible	Susceptible	Susceptible	Susceptible		Susceptible	Susceptible		Susceptible		Susceptible		Susceptible	Susceptible	Susceptible	Susceptible		Susceptible	Susceptible GSS 1.5		Susceptible GSS 1.5		Susceptible GSS 1.5		Susceptible GSS 1.5	Susceptible GSS 1.5	Susceptible GSS 1	Susceptible GSS 1.5		Susceptible GSS 1.5
xaa_166 172140_K20K	Susceptible	Susceptible	Susceptible	Susceptible	Susceptible			Susceptible		Susceptible	Susceptible	Susceptible	Susceptible		Possible resistance		Susceptible	Susceptible	Susceptible	Susceptible	Susceptible	Possible resistance		Susceptible	Susceptible		Susceptible		Susceptible		Susceptible	Susceptible	Susceptible	Susceptible		Susceptible	Susceptible GSS 1.5		Susceptible GSS 1.5		Susceptible GSS 1.5		Susceptible GSS 1.5	Susceptible GSS 1.5	Susceptible GSS 1	Susceptible GSS 1.5		Susceptible GSS 1.5
xaa_167 172140_K20T	Susceptible	Susceptible	Susceptible	Susceptible	Susceptible			Susceptible		Susceptible	Susceptible	Susceptible	Susceptible		Possible resistance		Susceptible	Susceptible	Susceptible	Susceptible	Susceptible	Resistance		Susceptible	Susceptible		Susceptible		Susceptible		Susceptible	Susceptible	Low-Level Resistance	Susceptible		Susceptible	Susceptible GSS 1.5		Susceptible GSS 1.5		Susceptible GSS 1.5		Susceptible GSS 1.5	Susceptible GSS 1.5	Susceptible GSS 1	Susceptible GSS 1.5		Susceptible GSS 1.5
xaa_168 187121_I15I_E21E_K43K_V77I	Susceptible	Susceptible	Susceptible	Susceptible	Susceptible			Susceptible		Susceptible	Susceptible	Susceptible	Susceptible		Susceptible		Susceptible	Susceptible	Susceptible	Susceptible	Susceptible	Susceptible		Susceptible	Susceptible		Susceptible		Susceptible		Susceptible	Susceptible	Susceptible	Susceptible		Susceptible	Susceptible GSS 1.5		Susceptible GSS 1.5		Susceptible GSS 1.5		Susceptible GSS 1.5	Susceptible GSS 1.5	Susceptible GSS 1	Susceptible GSS 1.5		Susceptible GSS 1.5
xaa_169 187121_I15I_E21G_K43K_V77I	Susceptible	Susceptible	Susceptible	Susceptible	Susceptible			Susceptible		Susceptible	Susceptible	Susceptible	Susceptible		Susceptible		Susceptible	Susceptible	Susceptible	Susceptible	Susceptible	Susceptible		Susceptible	Susceptible		Susceptible		Susceptible		Susceptible	Susceptible	Susceptible	Susceptible		Susceptible	Susceptible GSS 1.5		Susceptible GSS 1.5		Susceptible GSS 1.5		Susceptible GSS 1.5	Susceptible GSS 1.5	Susceptible GSS 1	Susceptible GSS 1.5		Susceptible GSS 1.5
xaa_170 187121_I15V_E21E_K43K_V77I	Susceptible	Susceptible	Susceptible	Susceptible	Susceptible			Susceptible		Susceptible	Susceptible	Susceptible	Susceptible		Susceptible		Susceptible	Susceptible	Susceptible	Susceptible	Susceptible	Susceptible		Susceptible	Susceptible		Susceptible		Susceptible		Susceptible	Susceptible	Susceptible	Susceptible		Susceptible	Susceptible GSS 1.5		Susceptible GSS 1.5		Susceptible GSS 1.5		Susceptible GSS 1.5	Susceptible GSS 1.5	Susceptible GSS 1	Susceptible GSS 1.5		Susceptible GSS 1.5
xaa_171 187121_I15V_E21E_K43K_V77V	Susceptible	Susceptible	Susceptible	Susceptible	Susceptible			Susceptible		Susceptible	Susceptible	Susceptible	Susceptible		Susceptible		Susceptible	Susceptible	Susceptible	Susceptible	Susceptible	Susceptible		Susceptible	Susceptible		Susceptible		Susceptible		Susceptible	Susceptible	Susceptible	Susceptible		Susceptible	Susceptible GSS 1.5		Susceptible GSS 1.5		Susceptible GSS 1.5		Susceptible GSS 1.5	Susceptible GSS 1.5	Susceptible GSS 1	Susceptible GSS 1.5		Susceptible GSS 1.5
xaa_172 187121_I15V_E21E_K43R_V77I	Susceptible	Susceptible	Susceptible	Susceptible	Susceptible			Susceptible		Susceptible	Susceptible	Susceptible	Susceptible		Susceptible		Susceptible	Susceptible	Susceptible	Susceptible	Susceptible	Susceptible		Susceptible	Susceptible		Susceptible		Susceptible		Susceptible	Susceptible	Susceptible	Susceptible		Susceptible	Susceptible GSS 1.5		Susceptible GSS 1.5		Susceptible GSS 1.5		Susceptible GSS 1.5	Susceptible GSS 1.5	Susceptible GSS 1	Susceptible GSS 1.5		Susceptible GSS 1.5
xaa_173 187121_I15V_E21G_K43K_V77I	Susceptible	Susceptible	Susceptible	Susceptible	Susceptible			Susceptible		Susceptible	Susceptible	Susceptible	Susceptible		Susceptible		Susceptible	Susceptible	Susceptible	Susceptible	Susceptible	Susceptible		Susceptible	Susceptible		Susceptible		Susceptible		Susceptible	Susceptible	Susceptible	Susceptible		Susceptible	Susceptible GSS 1.5		Susceptible GSS 1.5		Susceptible GSS 1.5		Susceptible GSS 1.5	Susceptible GSS 1.5	Susceptible GSS 1	Susceptible GSS 1.5		Susceptible GSS 1.5
xaa_174 187127	Susceptible	Susceptible	Susceptible	Susceptible	Susceptible			Susceptible		Susceptible	Susceptible	Susceptible	Susceptible		Susceptible		Susceptible	Susceptible	Susceptible	Susceptible	Susceptible	Susceptible		Susceptible	Susceptible		Susceptible		Susceptible		Susceptible	Susceptible	Susceptible	Susceptible		Susceptible	Susceptible GSS 1.5		Susceptible GSS 1.5		Susceptible GSS 1.5		Susceptible GSS 1.5	Susceptible GSS 1.5	Susceptible GSS 1	Susceptible GSS 1.5		Susceptible GSS 1.5
xaa_175 187147_M36I_L63L_I64I_I72I_V77I	Susceptible	Susceptible	Susceptible	Susceptible	Susceptible			Susceptible		Susceptible	Susceptible	Susceptible	Susceptible		Susceptible		Susceptible	Susceptible	Susceptible	Susceptible	Susceptible	Susceptible		Susceptible	Susceptible		Susceptible		Susceptible		Susceptible	Susceptible	Susceptible	Susceptible		Susceptible	Susceptible GSS 1.5		Susceptible GSS 1.5		Susceptible GSS 1.5		Susceptible GSS 1.5	Susceptible GSS 1.5	Susceptible GSS 1	Susceptible GSS 1.5		Susceptible GSS 1.5
xaa_176 187147_M36I_L63L_I64I_I72I_V77V	Susceptible	Susceptible	Susceptible	Susceptible	Susceptible			Susceptible		Susceptible	Susceptible	Susceptible	Susceptible		Susceptible		Susceptible	Susceptible	Susceptible	Susceptible	Susceptible	Susceptible		Susceptible	Susceptible		Susceptible		Susceptible		Susceptible	Susceptible	Susceptible	Susceptible		Susceptible	Susceptible GSS 1.5		Susceptible GSS 1.5		Susceptible GSS 1.5		Susceptible GSS 1.5	Susceptible GSS 1.5	Susceptible GSS 1	Susceptible GSS 1.5		Susceptible GSS 1.5
xaa_177 187147_M36I_L63L_I64I_I72V_V77I	Susceptible	Susceptible	Susceptible	Susceptible	Susceptible			Susceptible		Susceptible	Susceptible	Susceptible	Susceptible		Susceptible		Susceptible	Susceptible	Susceptible	Susceptible	Susceptible	Susceptible		Susceptible	Susceptible		Susceptible		Susceptible		Susceptible	Susceptible	Susceptible	Susceptible		Susceptible	Susceptible GSS 1.5		Susceptible GSS 1.5		Susceptible GSS 1.5		Susceptible GSS 1.5	Susceptible GSS 1.5	Susceptible GSS 1	Susceptible GSS 1.5		Susceptible GSS 1.5
xaa_178 187147_M36I_L63L_I64I_I72V_V77V	Susceptible	Susceptible	Susceptible	Susceptible	Susceptible			Susceptible		Susceptible	Susceptible	Susceptible	Susceptible		Susceptible		Susceptible	Susceptible	Susceptible	Susceptible	Susceptible	Susceptible		Susceptible	Susceptible		Susceptible		Susceptible		Susceptible	Susceptible	Susceptible	Susceptible		Susceptible	Susceptible GSS 1.5		Susceptible GSS 1.5		Susceptible GSS 1.5		Susceptible GSS 1.5	Susceptible GSS 1.5	Susceptible GSS 1	Susceptible GSS 1.5		Susceptible GSS 1.5
xaa_179 187147_M36I_L63L_I64V_I72I_V77I	Susceptible	Susceptible	Susceptible	Susceptible	Susceptible			Susceptible		Susceptible	Susceptible	Susceptible	Susceptible		Susceptible		Susceptible	Susceptible	Susceptible	Susceptible	Susceptible	Susceptible		Susceptible	Susceptible		Susceptible		Susceptible		Susceptible	Susceptible	Susceptible	Susceptible		Susceptible	Susceptible GSS 1.5		Susceptible GSS 1.5		Susceptible GSS 1.5		Susceptible GSS 1.5	Susceptible GSS 1.5	Susceptible GSS 1	Susceptible GSS 1.5		Susceptible GSS 1.5
xaa_180 187147_M36I_L63L_I64V_I72V_V77I	Susceptible	Susceptible	Susceptible	Susceptible	Susceptible			Susceptible		Susceptible	Susceptible	Susceptible	Susceptible		Susceptible		Susceptible	Susceptible	Susceptible	Susceptible	Susceptible	Susceptible		Susceptible	Susceptible		Susceptible		Susceptible		Susceptible	Susceptible	Susceptible	Susceptible		Susceptible	Susceptible GSS 1.5		Susceptible GSS 1.5		Susceptible GSS 1.5		Susceptible GSS 1.5	Susceptible GSS 1.5	Susceptible GSS 1	Susceptible GSS 1.5		Susceptible GSS 1.5
xaa_181 187147_M36I_L63L_I64V_I72V_V77V	Susceptible	Susceptible	Susceptible	Susceptible	Susceptible			Susceptible		Susceptible	Susceptible	Susceptible	Susceptible		Susceptible		Susceptible	Susceptible	Susceptible	Susceptible	Susceptible	Susceptible		Susceptible	Susceptible		Susceptible		Susceptible		Susceptible	Susceptible	Susceptible	Susceptible		Susceptible	Susceptible GSS 1.5		Susceptible GSS 1.5		Susceptible GSS 1.5		Susceptible GSS 1.5	Susceptible GSS 1.5	Susceptible GSS 1	Susceptible GSS 1.5		Susceptible GSS 1.5
xaa_182 187147_M36I_L63P_I64I_I72I_V77I	Susceptible	Susceptible	Susceptible	Susceptible	Susceptible			Susceptible		Susceptible	Susceptible	Susceptible	Susceptible		Susceptible		Susceptible	Susceptible	Susceptible	Susceptible	Susceptible	Susceptible		Susceptible	Susceptible		Susceptible		Susceptible		Susceptible	Susceptible	Susceptible	Susceptible		Susceptible	Susceptible GSS 1.5		Susceptible GSS 1.5		Susceptible GSS 1.5		Susceptible GSS 1.5	Susceptible GSS 1.5	Susceptible GSS 1	Susceptible GSS 1.5		Susceptible GSS 1.5
xaa_183 187147_M36I_L63P_I64I_I72V_V77I	Susceptible	Susceptible	Susceptible	Susceptible	Susceptible			Susceptible		Susceptible	Susceptible	Susceptible	Susceptible		Susceptible		Susceptible	Susceptible	Susceptible	Susceptible	Susceptible	Susceptible		Susceptible	Susceptible		Susceptible		Susceptible		Susceptible	Susceptible	Susceptible	Susceptible		Susceptible	Susceptible GSS 1.5		Susceptible GSS 1.5		Susceptible GSS 1.5		Susceptible GSS 1.5	Susceptible GSS 1.5	Susceptible GSS 1	Susceptible GSS 1.5		Susceptible GSS 1.5
xaa_184 187147_M36I_L63P_I64I_I72V_V77V	Susceptible	Susceptible	Susceptible	Susceptible	Susceptible			Susceptible		Susceptible	Susceptible	Susceptible	Susceptible		Susceptible		Susceptible	Susceptible	Susceptible	Susceptible	Susceptible	Susceptible		Susceptible	Susceptible		Susceptible		Susceptible		Susceptible	Susceptible	Susceptible	Susceptible		Susceptible	Susceptible GSS 1.5		Susceptible GSS 1.5		Susceptible GSS 1.5		Susceptible GSS 1.5	Susceptible GSS 1.5	Susceptible GSS 1	Susceptible GSS 1.5		Susceptible GSS 1.5
xaa_185 187147_M36I_L63P_I64V_I72I_V77I	Susceptible	Susceptible	Susceptible	Susceptible	Susceptible			Susceptible		Susceptible	Susceptible	Susceptible	Susceptible		Susceptible		Susceptible	Susceptible	Susceptible	Susceptible	Susceptible	Susceptible		Susceptible	Susceptible		Susceptible		Susceptible		Susceptible	Susceptible	Susceptible	Susceptible		Susceptible	Susceptible GSS 1.5		Susceptible GSS 1.5		Susceptible GSS 1.5		Susceptible GSS 1.5	Susceptible GSS 1.5	Susceptible GSS 1	Susceptible GSS 1.5		Susceptible GSS 1.5
xaa_186 187147_M36I_L63P_I64V_I72V_V77I	Susceptible	Susceptible	Susceptible	Susceptible	Susceptible			Susceptible		Susceptible	Susceptible	Susceptible	Susceptible		Susceptible		Susceptible	Susceptible	Susceptible	Susceptible	Susceptible	Susceptible		Susceptible	Susceptible		Susceptible		Susceptible		Susceptible	Susceptible	Susceptible	Susceptible		Susceptible	Susceptible GSS 1.5		Susceptible GSS 1.5		Susceptible GSS 1.5		Susceptible GSS 1.5	Susceptible GSS 1.5	Susceptible GSS 1	Susceptible GSS 1.5		Susceptible GSS 1.5
xaa_187 187147_M36M_L63L_I64I_I72I_V77I	Susceptible	Susceptible	Susceptible	Susceptible	Susceptible			Susceptible		Susceptible	Susceptible	Susceptible	Susceptible		Susceptible		Susceptible	Susceptible	Susceptible	Susceptible	Susceptible	Susceptible		Susceptible	Susceptible		Susceptible		Susceptible		Susceptible	Susceptible	Susceptible	Susceptible		Susceptible	Susceptible GSS 1.5		Susceptible GSS 1.5		Susceptible GSS 1.5		Susceptible GSS 1.5	Susceptible GSS 1.5	Susceptible GSS 1	Susceptible GSS 1.5		Susceptible GSS 1.5
xaa_188 187147_M36M_L63L_I64I_I72V_V77I	Susceptible	Susceptible	Susceptible	Susceptible	Susceptible			Susceptible		Susceptible	Susceptible	Susceptible	Susceptible		Susceptible		Susceptible	Susceptible	Susceptible	Susceptible	Susceptible	Susceptible		Susceptible	Susceptible		Susceptible		Susceptible		Susceptible	Susceptible	Susceptible	Susceptible		Susceptible	Susceptible GSS 1.5		Susceptible GSS 1.5		Susceptible GSS 1.5		Susceptible GSS 1.5	Susceptible GSS 1.5	Susceptible GSS 1	Susceptible GSS 1.5		Susceptible GSS 1.5
xaa_189 187147_M36M_L63L_I64V_I72I_V77I	Susceptible	Susceptible	Susceptible	Susceptible	Susceptible			Susceptible		Susceptible	Susceptible	Susceptible	Susceptible		Susceptible		Susceptible	Susceptible	Susceptible	Susceptible	Susceptible	Susceptible		Susceptible	Susceptible		Susceptible		Susceptible		Susceptible	Susceptible	Susceptible	Susceptible		Susceptible	Susceptible GSS 1.5		Susceptible GSS 1.5		Susceptible GSS 1.5		Susceptible GSS 1.5	Susceptible GSS 1.5	Susceptible GSS 1	Susceptible GSS 1.5		Susceptible GSS 1.5
xaa_190 187147_M36M_L63L_I64V_I72V_V77I	Susceptible	Susceptible	Susceptible	Susceptible	Susceptible			Susceptible		Susceptible	Susceptible	Susceptible	Susceptible		Susceptible		Susceptible	Susceptible	Susceptible	Susceptible	Susceptible	Susceptible		Susceptible	Susceptible		Susceptible		Susceptible		Susceptible	Susceptible	Susceptible	Susceptible		Susceptible	Susceptible GSS 1.5		Susceptible GSS 1.5		Susceptible GSS 1.5		Susceptible GSS 1.5	Susceptible GSS 1.5	Susceptible GSS 1	Susceptible GSS 1.5		Susceptible GSS 1.5
xaa_191 187147_M36M_L63P_I64I_I72V_V77I	Susceptible	Susceptible	Susceptible	Susceptible	Susceptible			Susceptible		Susceptible	Susceptible	Susceptible	Susceptible		Susceptible		Susceptible	Susceptible	Susceptible	Susceptible	Susceptible	Susceptible		Susceptible	Susceptible		Susceptible		Susceptible		Susceptible	Susceptible	Susceptible	Susceptible		Susceptible	Susceptible GSS 1.5		Susceptible GSS 1.5		Susceptible GSS 1.5		Susceptible GSS 1.5	Susceptible GSS 1.5	Susceptible GSS 1	Susceptible GSS 1.5		Susceptible GSS 1.5
xaa_192 187147_M36M_L63P_I64V_I72V_V77I	Susceptible	Susceptible	Susceptible	Susceptible	Susceptible			Susceptible		Susceptible	Susceptible	Susceptible	Susceptible		Susceptible		Susceptible	Susceptible	Susceptible	Susceptible	Susceptible	Susceptible		Susceptible	Susceptible		Susceptible		Susceptible		Susceptible	Susceptible	Susceptible	Susceptible		Susceptible	Susceptible GSS 1.5		Susceptible GSS 1.5		Susceptible GSS 1.5		Susceptible GSS 1.5	Susceptible GSS 1.5	Susceptible GSS 1	Susceptible GSS 1.5		Susceptible GSS 1.5
xaa_193 187149_I72I_L89L_L90S	Susceptible	Susceptible	Susceptible	Susceptible	Susceptible			Susceptible		Susceptible	Susceptible	Susceptible	Susceptible		Susceptible		Susceptible	Susceptible	Susceptible	Susceptible	Susceptible	Susceptible		Possible resistance	Susceptible		Susceptible		Susceptible		Susceptible	Susceptible	Susceptible	Susceptible		Susceptible	Susceptible GSS 1.5		Susceptible GSS 1.5		Susceptible GSS 1.5		Susceptible GSS 1.5	Susceptible GSS 1.5	Susceptible GSS 1	Susceptible GSS 1.5		Susceptible GSS 1.5
xaa_194 187149_I72M_L89L_L90S	Susceptible	Susceptible	Susceptible	Susceptible	Susceptible			Susceptible		Susceptible	Susceptible	Susceptible	Susceptible		Susceptible		Susceptible	Susceptible	Susceptible	Susceptible	Susceptible	Susceptible		Possible resistance	Susceptible		Susceptible		Susceptible		Susceptible	Susceptible	Susceptible	Susceptible		Susceptible	Susceptible GSS 1.5		Susceptible GSS 1.5		Susceptible GSS 1.5		Susceptible GSS 1.5	Susceptible GSS 1.5	Susceptible GSS 1	Susceptible GSS 1.5		Susceptible GSS 1.5
xaa_195 187159_L10L_I13I_E35D_R41K_I62I_L63L_A71A	Susceptible	Susceptible	Susceptible	Susceptible	Susceptible			Susceptible		Susceptible	Susceptible	Susceptible	Susceptible		Susceptible		Susceptible	Susceptible	Susceptible	Susceptible	Susceptible	Susceptible		Susceptible	Susceptible		Susceptible		Susceptible		Susceptible	Susceptible	Susceptible	Susceptible		Susceptible	Susceptible GSS 1.5		Susceptible GSS 1.5		Susceptible GSS 1.5		Susceptible GSS 1.5	Susceptible GSS 1.5	Susceptible GSS 1	Susceptible GSS 1.5		Susceptible GSS 1.5
xaa_196 187159_L10L_I13I_E35D_R41R_I62I_L63L_A71A	Susceptible	Susceptible	Susceptible	Susceptible	Susceptible			Susceptible		Susceptible	Susceptible	Susceptible	Susceptible		Susceptible		Susceptible	Susceptible	Susceptible	Susceptible	Susceptible	Susceptible		Susceptible	Susceptible		Susceptible		Susceptible		Susceptible	Susceptible	Susceptible	Susceptible		Susceptible	Susceptible GSS 1.5		Susceptible GSS 1.5		Susceptible GSS 1.5		Susceptible GSS 1.5	Susceptible GSS 1.5	Susceptible GSS 1	Susceptible GSS 1.5		Susceptible GSS 1.5
xaa_197 187159_L10L_I13I_E35D_R41R_I62I_L63L_A71V	Susceptible	Susceptible	Susceptible	Susceptible	Susceptible			Susceptible		Susceptible	Susceptible	Susceptible	Susceptible		Susceptible		Susceptible	Susceptible	Susceptible	Susceptible	Susceptible	Susceptible		Susceptible	Susceptible		Susceptible		Susceptible		Susceptible	Susceptible	Susceptible	Susceptible		Susceptible	Susceptible GSS 1.5		Susceptible GSS 1.5		Susceptible GSS 1.5		Susceptible GSS 1.5	Susceptible GSS 1.5	Susceptible GSS 1	Susceptible GSS 1.5		Susceptible GSS 1.5
xaa_198 187159_L10L_I13I_E35D_R41R_I62I_L63P_A71A	Susceptible	Susceptible	Susceptible	Susceptible	Susceptible			Susceptible		Susceptible	Susceptible	Susceptible	Susceptible		Susceptible		Susceptible	Susceptible	Susceptible	Susceptible	Susceptible	Susceptible		Susceptible	Susceptible		Susceptible		Susceptible		Susceptible	Susceptible	Susceptible	Susceptible		Susceptible	Susceptible GSS 1.5		Susceptible GSS 1.5		Susceptible GSS 1.5		Susceptible GSS 1.5	Susceptible GSS 1.5	Susceptible GSS 1	Susceptible GSS 1.5		Susceptible GSS 1.5
xaa_199 187159_L10L_I13I_E35D_R41R_I62L_L63L_A71A	Susceptible	Susceptible	Susceptible	Susceptible	Susceptible			Susceptible		Susceptible	Susceptible	Susceptible	Susceptible		Susceptible		Susceptible	Susceptible	Susceptible	Susceptible	Susceptible	Susceptible		Susceptible	Susceptible		Susceptible		Susceptible		Susceptible	Susceptible	Susceptible	Susceptible		Susceptible	Susceptible GSS 1.5		Susceptible GSS 1.5		Susceptible GSS 1.5		Susceptible GSS 1.5	Susceptible GSS 1.5	Susceptible GSS 1	Susceptible GSS 1.5		Susceptible GSS 1.5
xaa_200 187159_L10L_I13I_E35D_R41R_I62L_L63P_A71A	Susceptible	Susceptible	Susceptible	Susceptible	Susceptible			Susceptible		Susceptible	Susceptible	Susceptible	Susceptible		Susceptible		Susceptible	Susceptible	Susceptible	Susceptible	Susceptible	Susceptible		Susceptible	Susceptible		Susceptible		Susceptible		Susceptible	Susceptible	Susceptible	Susceptible		Susceptible	Susceptible GSS 1.5		Susceptible GSS 1.5		Susceptible GSS 1.5		Susceptible GSS 1.5	Susceptible GSS 1.5	Susceptible GSS 1	Susceptible GSS 1.5		Susceptible GSS 1.5
xaa_201 187159_L10L_I13I_E35D_R41R_I62L_L63P_A71V	Susceptible	Susceptible	Susceptible	Susceptible	Susceptible			Susceptible		Susceptible	Susceptible	Susceptible	Susceptible		Susceptible		Susceptible	Susceptible	Susceptible	Susceptible	Susceptible	Susceptible		Susceptible	Susceptible		Susceptible		Susceptible		Susceptible	Susceptible	Susceptible	Susceptible		Susceptible	Susceptible GSS 1.5		Susceptible GSS 1.5		Susceptible GSS 1.5		Susceptible GSS 1.5	Susceptible GSS 1.5	Susceptible GSS 1	Susceptible GSS 1.5		Susceptible GSS 1.5
xaa_202 187159_L10L_I13I_E35E_R41R_I62I_L63L_A71A	Susceptible	Susceptible	Susceptible	Susceptible	Susceptible			Susceptible		Susceptible	Susceptible	Susceptible	Susceptible		Susceptible		Susceptible	Susceptible	Susceptible	Susceptible	Susceptible	Susceptible		Susceptible	Susceptible		Susceptible		Susceptible		Susceptible	Susceptible	Susceptible	Susceptible		Susceptible	Susceptible GSS 1.5		Susceptible GSS 1.5		Susceptible GSS 1.5		Susceptible GSS 1.5	Susceptible GSS 1.5	Susceptible GSS 1	Susceptible GSS 1.5		Susceptible GSS 1.5
xaa_203 187159_L10L_I13I_E35E_R41R_I62I_L63P_A71A	Susceptible	Susceptible	Susceptible	Susceptible	Susceptible			Susceptible		Susceptible	Susceptible	Susceptible	Susceptible		Susceptible		Susceptible	Susceptible	Susceptible	Susceptible	Susceptible	Susceptible		Susceptible	Susceptible		Susceptible		Susceptible		Susceptible	Susceptible	Susceptible	Susceptible		Susceptible	Susceptible GSS 1.5		Susceptible GSS 1.5		Susceptible GSS 1.5		Susceptible GSS 1.5	Susceptible GSS 1.5	Susceptible GSS 1	Susceptible GSS 1.5		Susceptible GSS 1.5
xaa_204 187159_L10L_I13I_E35E_R41R_I62L_L63L_A71A	Susceptible	Susceptible	Susceptible	Susceptible	Susceptible			Susceptible		Susceptible	Susceptible	Susceptible	Susceptible		Susceptible		Susceptible	Susceptible	Susceptible	Susceptible	Susceptible	Susceptible		Susceptible	Susceptible		Susceptible		Susceptible		Susceptible	Susceptible	Susceptible	Susceptible		Susceptible	Susceptible GSS 1.5		Susceptible GSS 1.5		Susceptible GSS 1.5		Susceptible GSS 1.5	Susceptible GSS 1.5	Susceptible GSS 1	Susceptible GSS 1.5		Susceptible GSS 1.5
xaa_205 187159_L10L_I13I_E35E_R41R_I62L_L63L_A71V	Susceptible	Susceptible	Susceptible	Susceptible	Susceptible			Susceptible		Susceptible	Susceptible	Susceptible	Susceptible		Susceptible		Susceptible	Susceptible	Susceptible	Susceptible	Susceptible	Susceptible		Susceptible	Susceptible		Susceptible		Susceptible		Susceptible	Susceptible	Susceptible	Susceptible		Susceptible	Susceptible GSS 1.5		Susceptible GSS 1.5		Susceptible GSS 1.5		Susceptible GSS 1.5	Susceptible GSS 1.5	Susceptible GSS 1	Susceptible GSS 1.5		Susceptible GSS 1.5
xaa_206 187159_L10L_I13I_E35E_R41R_I62L_L63P_A71A	Susceptible	Susceptible	Susceptible	Susceptible	Susceptible			Susceptible		Susceptible	Susceptible	Susceptible	Susceptible		Susceptible		Susceptible	Susceptible	Susceptible	Susceptible	Susceptible	Susceptible		Susceptible	Susceptible		Susceptible		Susceptible		Susceptible	Susceptible	Susceptible	Susceptible		Susceptible	Susceptible GSS 1.5		Susceptible GSS 1.5		Susceptible GSS 1.5		Susceptible GSS 1.5	Susceptible GSS 1.5	Susceptible GSS 1	Susceptible GSS 1.5		Susceptible GSS 1.5
xaa_207 187159_L10L_I13I_E35E_R41R_I62L_L63P_A71V	Susceptible	Susceptible	Susceptible	Susceptible	Susceptible			Susceptible		Susceptible	Susceptible	Susceptible	Susceptible		Susceptible		Susceptible	Susceptible	Susceptible	Susceptible	Susceptible	Susceptible		Susceptible	Susceptible		Susceptible		Susceptible		Susceptible	Susceptible	Susceptible	Susceptible		Susceptible	Susceptible GSS 1.5		Susceptible GSS 1.5		Susceptible GSS 1.5		Susceptible GSS 1.5	Susceptible GSS 1.5	Susceptible GSS 1	Susceptible GSS 1.5		Susceptible GSS 1.5
xaa_208 187161_E35D_M36I_N37C_R41R_I62I_L63L_A71A_N83N_C95R	Susceptible	Susceptible	Susceptible	Susceptible	Susceptible			Susceptible		Susceptible	Susceptible	Susceptible	Susceptible		Susceptible		Susceptible	Susceptible	Susceptible	Susceptible	Susceptible	Susceptible		Susceptible	Susceptible		Susceptible		Susceptible		Susceptible	Susceptible	Susceptible	Susceptible		Susceptible	Susceptible GSS 1.5		Susceptible GSS 1.5		Susceptible GSS 1.5		Susceptible GSS 1.5	Susceptible GSS 1.5	Susceptible GSS 1	Susceptible GSS 1.5		Susceptible GSS 1.5
xaa_209 187161_E35D_M36I_N37C_R41R_I62I_L63P_A71A_N83N_C95R	Susceptible	Susceptible	Susceptible	Susceptible	Susceptible			Susceptible		Susceptible	Susceptible	Susceptible	Susceptible		Susceptible		Susceptible	Susceptible	Susceptible	Susceptible	Susceptible	Susceptible		Susceptible	Susceptible		Susceptible		Susceptible		Susceptible	Susceptible	Susceptible	Susceptible		Susceptible	Susceptible GSS 1.5		Susceptible GSS 1.5		Susceptible GSS 1.5		Susceptible GSS 1.5	Susceptible GSS 1.5	Susceptible GSS 1	Susceptible GSS 1.5		Susceptible GSS 1.5
xaa_210 187161_E35D_M36I_N37C_R41R_I62L_L63L_A71A_N83D_C95C	Susceptible	Susceptible	Susceptible	Susceptible	Susceptible			Susceptible		Susceptible	Susceptible	Susceptible	Susceptible		Susceptible		Susceptible	Susceptible	Susceptible	Susceptible	Susceptible	Susceptible		Susceptible	Susceptible		Potential Low-Level Resistance		Susceptible		Potential Low-Level Resistance	Susceptible	Low-Level Resistance	Potential Low-Level Resistance		Low-Level Resistance	Susceptible GSS 1.5		Susceptible GSS 1.5		Susceptible GSS 1.5		Susceptible GSS 1.5	Susceptible GSS 1.5	Susceptible GSS 1	Susceptible GSS 1.5		Susceptible GSS 1.5
xaa_211 187161_E35D_M36I_N37C_R41R_I62L_L63L_A71A_N83D_C95R	Susceptible	Susceptible	Susceptible	Susceptible	Susceptible			Susceptible		Susceptible	Susceptible	Susceptible	Susceptible		Susceptible		Susceptible	Susceptible	Susceptible	Susceptible	Susceptible	Susceptible		Susceptible	Susceptible		Potential Low-Level Resistance		Susceptible		Potential Low-Level Resistance	Susceptible	Low-Level Resistance	Potential Low-Level Resistance		Low-Level Resistance	Susceptible GSS 1.5		Susceptible GSS 1.5		Susceptible GSS 1.5		Susceptible GSS 1.5	Susceptible GSS 1.5	Susceptible GSS 1	Susceptible GSS 1.5		Susceptible GSS 1.5
xaa_212 187161_E35D_M36I_N37C_R41R_I62L_L63L_A71A_N83N_C95C	Susceptible	Susceptible	Susceptible	Susceptible	Susceptible			Susceptible		Susceptible	Susceptible	Susceptible	Susceptible		Susceptible		Susceptible	Susceptible	Susceptible	Susceptible	Susceptible	Susceptible		Susceptible	Susceptible		Susceptible		Susceptible		Susceptible	Susceptible	Susceptible	Susceptible		Susceptible	Susceptible GSS 1.5		Susceptible GSS 1.5		Susceptible GSS 1.5		Susceptible GSS 1.5	Susceptible GSS 1.5	Susceptible GSS 1	Susceptible GSS 1.5		Susceptible GSS 1.5
xaa_213 187161_E35D_M36I_N37C_R41R_I62L_L63L_A71A_N83N_C95R	Susceptible	Susceptible	Susceptible	Susceptible	Susceptible			Susceptible		Susceptible	Susceptible	Susceptible	Susceptible		Susceptible		Susceptible	Susceptible	Susceptible	Susceptible	Susceptible	Susceptible		Susceptible	Susceptible		Susceptible		Susceptible		Susceptible	Susceptible	Susceptible	Susceptible		Susceptible	Susceptible GSS 1.5		Susceptible GSS 1.5		Susceptible GSS 1.5		Susceptible GSS 1.5	Susceptible GSS 1.5	Susceptible GSS 1	Susceptible GSS 1.5		Susceptible GSS 1.5
xaa_214 187161_E35D_M36I_N37C_R41R_I62L_L63P_A71A_N83D_C95R	Susceptible	Susceptible	Susceptible	Susceptible	Susceptible			Susceptible		Susceptible	Susceptible	Susceptible	Susceptible		Susceptible		Susceptible	Susceptible	Susceptible	Susceptible	Susceptible	Susceptible		Susceptible	Susceptible		Potential Low-Level Resistance		Susceptible		Potential Low-Level Resistance	Susceptible	Low-Level Resistance	Potential Low-Level Resistance		Low-Level Resistance	Susceptible GSS 1.5		Susceptible GSS 1.5		Susceptible GSS 1.5		Susceptible GSS 1.5	Susceptible GSS 1.5	Susceptible GSS 1	Susceptible GSS 1.5		Susceptible GSS 1.5
xaa_215 187161_E35D_M36I_N37C_R41R_I62L_L63P_A71A_N83N_C95R	Susceptible	Susceptible	Susceptible	Susceptible	Susceptible			Susceptible		Susceptible	Susceptible	Susceptible	Susceptible		Susceptible		Susceptible	Susceptible	Susceptible	Susceptible	Susceptible	Susceptible		Susceptible	Susceptible		Susceptible		Susceptible		Susceptible	Susceptible	Susceptible	Susceptible		Susceptible	Susceptible GSS 1.5		Susceptible GSS 1.5		Susceptible GSS 1.5		Susceptible GSS 1.5	Susceptible GSS 1.5	Susceptible GSS 1	Susceptible GSS 1.5		Susceptible GSS 1.5
xaa_216 187161_E35D_M36I_N37C_R41R_I62L_L63P_A71V_N83D_C95C	Susceptible	Susceptible	Susceptible	Susceptible	Susceptible			Susceptible		Susceptible	Susceptible	Susceptible	Susceptible		Susceptible		Susceptible	Susceptible	Susceptible	Susceptible	Susceptible	Susceptible		Susceptible	Susceptible		Potential Low-Level Resistance		Susceptible		Potential Low-Level Resistance	Susceptible	Low-Level Resistance	Potential Low-Level Resistance		Low-Level Resistance	Susceptible GSS 1.5		Susceptible GSS 1.5		Susceptible GSS 1.5		Susceptible GSS 1.5	Susceptible GSS 1.5	Susceptible GSS 1	Susceptible GSS 1.5		Susceptible GSS 1.5
xaa_217 187161_E35D_M36I_N37C_R41R_I62L_L63P_A71V_N83N_C95R	Susceptible	Susceptible	Susceptible	Susceptible	Susceptible			Susceptible		Susceptible	Susceptible	Susceptible	Susceptible		Susceptible		Susceptible	Susceptible	Susceptible	Susceptible	Susceptible	Susceptible		Susceptible	Susceptible		Susceptible		Susceptible		Susceptible	Susceptible	Susceptible	Susceptible		Susceptible	Susceptible GSS 1.5		Susceptible GSS 1.5		Susceptible GSS 1.5		Susceptible GSS 1.5	Susceptible GSS 1.5	Susceptible GSS 1	Susceptible GSS 1.5		Susceptible GSS 1.5
xaa_218 187161_E35D_M36I_N37N_R41K_I62I_L63L_A71A_N83D_C95C	Susceptible	Susceptible	Susceptible	Susceptible	Susceptible			Susceptible		Susceptible	Susceptible	Susceptible	Susceptible		Susceptible		Susceptible	Susceptible	Susceptible	Susceptible	Susceptible	Susceptible		Susceptible	Susceptible		Potential Low-Level Resistance		Susceptible		Potential Low-Level Resistance	Susceptible	Low-Level Resistance	Potential Low-Level Resistance		Low-Level Resistance	Susceptible GSS 1.5		Susceptible GSS 1.5		Susceptible GSS 1.5		Susceptible GSS 1.5	Susceptible GSS 1.5	Susceptible GSS 1	Susceptible GSS 1.5		Susceptible GSS 1.5
xaa_219 187161_E35D_M36I_N37N_R41K_I62I_L63L_A71A_N83D_C95R	Susceptible	Susceptible	Susceptible	Susceptible	Susceptible			Susceptible		Susceptible	Susceptible	Susceptible	Susceptible		Susceptible		Susceptible	Susceptible	Susceptible	Susceptible	Susceptible	Susceptible		Susceptible	Susceptible		Potential Low-Level Resistance		Susceptible		Potential Low-Level Resistance	Susceptible	Low-Level Resistance	Potential Low-Level Resistance		Low-Level Resistance	Susceptible GSS 1.5		Susceptible GSS 1.5		Susceptible GSS 1.5		Susceptible GSS 1.5	Susceptible GSS 1.5	Susceptible GSS 1	Susceptible GSS 1.5		Susceptible GSS 1.5
xaa_220 187161_E35D_M36I_N37N_R41K_I62I_L63L_A71A_N83N_C95C	Susceptible	Susceptible	Susceptible	Susceptible	Susceptible			Susceptible		Susceptible	Susceptible	Susceptible	Susceptible		Susceptible		Susceptible	Susceptible	Susceptible	Susceptible	Susceptible	Susceptible		Susceptible	Susceptible		Susceptible		Susceptible		Susceptible	Susceptible	Susceptible	Susceptible		Susceptible	Susceptible GSS 1.5		Susceptible GSS 1.5		Susceptible GSS 1.5		Susceptible GSS 1.5	Susceptible GSS 1.5	Susceptible GSS 1	Susceptible GSS 1.5		Susceptible GSS 1.5
xaa_221 187161_E35D_M36I_N37N_R41K_I62I_L63L_A71A_N83N_C95R	Susceptible	Susceptible	Susceptible	Susceptible	Susceptible			Susceptible		Susceptible	Susceptible	Susceptible	Susceptible		Susceptible		Susceptible	Susceptible	Susceptible	Susceptible	Susceptible	Susceptible		Susceptible	Susceptible		Susceptible		Susceptible		Susceptible	Susceptible	Susceptible	Susceptible		Susceptible	Susceptible GSS 1.5		Susceptible GSS 1.5		Susceptible GSS 1.5		Susceptible GSS 1.5	Susceptible GSS 1.5	Susceptible GSS 1	Susceptible GSS 1.5		Susceptible GSS 1.5
xaa_222 187161_E35D_M36I_N37N_R41K_I62I_L63P_A71A_N83D_C95C	Susceptible	Susceptible	Susceptible	Susceptible	Susceptible			Susceptible		Susceptible	Susceptible	Susceptible	Susceptible		Susceptible		Susceptible	Susceptible	Susceptible	Susceptible	Susceptible	Susceptible		Susceptible	Susceptible		Potential Low-Level Resistance		Susceptible		Potential Low-Level Resistance	Susceptible	Low-Level Resistance	Potential Low-Level Resistance		Low-Level Resistance	Susceptible GSS 1.5		Susceptible GSS 1.5		Susceptible GSS 1.5		Susceptible GSS 1.5	Susceptible GSS 1.5	Susceptible GSS 1	Susceptible GSS 1.5		Susceptible GSS 1.5
xaa_223 187161_E35D_M36I_N37N_R41K_I62I_L63P_A71A_N83D_C95R	Susceptible	Susceptible	Susceptible	Susceptible	Susceptible			Susceptible		Susceptible	Susceptible	Susceptible	Susceptible		Susceptible		Susceptible	Susceptible	Susceptible	Susceptible	Susceptible	Susceptible		Susceptible	Susceptible		Potential Low-Level Resistance		Susceptible		Potential Low-Level Resistance	Susceptible	Low-Level Resistance	Potential Low-Level Resistance		Low-Level Resistance	Susceptible GSS 1.5		Susceptible GSS 1.5		Susceptible GSS 1.5		Susceptible GSS 1.5	Susceptible GSS 1.5	Susceptible GSS 1	Susceptible GSS 1.5		Susceptible GSS 1.5
xaa_224 187161_E35D_M36I_N37N_R41K_I62I_L63P_A71A_N83N_C95C	Susceptible	Susceptible	Susceptible	Susceptible	Susceptible			Susceptible		Susceptible	Susceptible	Susceptible	Susceptible		Susceptible		Susceptible	Susceptible	Susceptible	Susceptible	Susceptible	Susceptible		Susceptible	Susceptible		Susceptible		Susceptible		Susceptible	Susceptible	Susceptible	Susceptible		Susceptible	Susceptible GSS 1.5		Susceptible GSS 1.5		Susceptible GSS 1.5		Susceptible GSS 1.5	Susceptible GSS 1.5	Susceptible GSS 1	Susceptible GSS 1.5		Susceptible GSS 1.5
xaa_225 187161_E35D_M36I_N37N_R41K_I62I_L63P_A71A_N83N_C95R	Susceptible	Susceptible	Susceptible	Susceptible	Susceptible			Susceptible		Susceptible	Susceptible	Susceptible	Susceptible		Susceptible		Susceptible	Susceptible	Susceptible	Susceptible	Susceptible	Susceptible		Susceptible	Susceptible		Susceptible		Susceptible		Susceptible	Susceptible	Susceptible	Susceptible		Susceptible	Susceptible GSS 1.5		Susceptible GSS 1.5		Susceptible GSS 1.5		Susceptible GSS 1.5	Susceptible GSS 1.5	Susceptible GSS 1	Susceptible GSS 1.5		Susceptible GSS 1.5
xaa_226 187161_E35D_M36I_N37N_R41K_I62L_L63L_A71A_N83D_C95C	Susceptible	Susceptible	Susceptible	Susceptible	Susceptible			Susceptible		Susceptible	Susceptible	Susceptible	Susceptible		Susceptible		Susceptible	Susceptible	Susceptible	Susceptible	Susceptible	Susceptible		Susceptible	Susceptible		Potential Low-Level Resistance		Susceptible		Potential Low-Level Resistance	Susceptible	Low-Level Resistance	Potential Low-Level Resistance		Low-Level Resistance	Susceptible GSS 1.5		Susceptible GSS 1.5		Susceptible GSS 1.5		Susceptible GSS 1.5	Susceptible GSS 1.5	Susceptible GSS 1	Susceptible GSS 1.5		Susceptible GSS 1.5
xaa_227 187161_E35D_M36I_N37N_R41K_I62L_L63L_A71A_N83D_C95R	Susceptible	Susceptible	Susceptible	Susceptible	Susceptible			Susceptible		Susceptible	Susceptible	Susceptible	Susceptible		Susceptible		Susceptible	Susceptible	Susceptible	Susceptible	Susceptible	Susceptible		Susceptible	Susceptible		Potential Low-Level Resistance		Susceptible		Potential Low-Level Resistance	Susceptible	Low-Level Resistance	Potential Low-Level Resistance		Low-Level Resistance	Susceptible GSS 1.5		Susceptible GSS 1.5		Susceptible GSS 1.5		Susceptible GSS 1.5	Susceptible GSS 1.5	Susceptible GSS 1	Susceptible GSS 1.5		Susceptible GSS 1.5
xaa_228 187161_E35D_M36I_N37N_R41K_I62L_L63L_A71A_N83N_C95C	Susceptible	Susceptible	Susceptible	Susceptible	Susceptible			Susceptible		Susceptible	Susceptible	Susceptible	Susceptible		Susceptible		Susceptible	Susceptible	Susceptible	Susceptible	Susceptible	Susceptible		Susceptible	Susceptible		Susceptible		Susceptible		Susceptible	Susceptible	Susceptible	Susceptible		Susceptible	Susceptible GSS 1.5		Susceptible GSS 1.5		Susceptible GSS 1.5		Susceptible GSS 1.5	Susceptible GSS 1.5	Susceptible GSS 1	Susceptible GSS 1.5		Susceptible GSS 1.5
xaa_229 187161_E35D_M36I_N37N_R41K_I62L_L63L_A71A_N83N_C95R	Susceptible	Susceptible	Susceptible	Susceptible	Susceptible			Susceptible		Susceptible	Susceptible	Susceptible	Susceptible		Susceptible		Susceptible	Susceptible	Susceptible	Susceptible	Susceptible	Susceptible		Susceptible	Susceptible		Susceptible		Susceptible		Susceptible	Susceptible	Susceptible	Susceptible		Susceptible	Susceptible GSS 1.5		Susceptible GSS 1.5		Susceptible GSS 1.5		Susceptible GSS 1.5	Susceptible GSS 1.5	Susceptible GSS 1	Susceptible GSS 1.5		Susceptible GSS 1.5
xaa_230 187161_E35D_M36I_N37N_R41K_I62L_L63L_A71V_N83D_C95R	Susceptible	Susceptible	Susceptible	Susceptible	Susceptible			Susceptible		Susceptible	Susceptible	Susceptible	Susceptible		Susceptible		Susceptible	Susceptible	Susceptible	Susceptible	Susceptible	Susceptible		Susceptible	Susceptible		Potential Low-Level Resistance		Susceptible		Potential Low-Level Resistance	Susceptible	Low-Level Resistance	Potential Low-Level Resistance		Low-Level Resistance	Susceptible GSS 1.5		Susceptible GSS 1.5		Susceptible GSS 1.5		Susceptible GSS 1.5	Susceptible GSS 1.5	Susceptible GSS 1	Susceptible GSS 1.5		Susceptible GSS 1.5
xaa_231 187161_E35D_M36I_N37N_R41K_I62L_L63P_A71A_N83D_C95R	Susceptible	Susceptible	Susceptible	Susceptible	Susceptible			Susceptible		Susceptible	Susceptible	Susceptible	Susceptible		Susceptible		Susceptible	Susceptible	Susceptible	Susceptible	Susceptible	Susceptible		Susceptible	Susceptible		Potential Low-Level Resistance		Susceptible		Potential Low-Level Resistance	Susceptible	Low-Level Resistance	Potential Low-Level Resistance		Low-Level Resistance	Susceptible GSS 1.5		Susceptible GSS 1.5		Susceptible GSS 1.5		Susceptible GSS 1.5	Susceptible GSS 1.5	Susceptible GSS 1	Susceptible GSS 1.5		Susceptible GSS 1.5
xaa_232 187161_E35D_M36I_N37N_R41R_I62I_L63L_A71A_N83D_C95C	Susceptible	Susceptible	Susceptible	Susceptible	Susceptible			Susceptible		Susceptible	Susceptible	Susceptible	Susceptible		Susceptible		Susceptible	Susceptible	Susceptible	Susceptible	Susceptible	Susceptible		Susceptible	Susceptible		Potential Low-Level Resistance		Susceptible		Potential Low-Level Resistance	Susceptible	Low-Level Resistance	Potential Low-Level Resistance		Low-Level Resistance	Susceptible GSS 1.5		Susceptible GSS 1.5		Susceptible GSS 1.5		Susceptible GSS 1.5	Susceptible GSS 1.5	Susceptible GSS 1	Susceptible GSS 1.5		Susceptible GSS 1.5
xaa_233 187161_E35D_M36I_N37N_R41R_I62I_L63L_A71A_N83D_C95R	Susceptible	Susceptible	Susceptible	Susceptible	Susceptible			Susceptible		Susceptible	Susceptible	Susceptible	Susceptible		Susceptible		Susceptible	Susceptible	Susceptible	Susceptible	Susceptible	Susceptible		Susceptible	Susceptible		Potential Low-Level Resistance		Susceptible		Potential Low-Level Resistance	Susceptible	Low-Level Resistance	Potential Low-Level Resistance		Low-Level Resistance	Susceptible GSS 1.5		Susceptible GSS 1.5		Susceptible GSS 1.5		Susceptible GSS 1.5	Susceptible GSS 1.5	Susceptible GSS 1	Susceptible GSS 1.5		Susceptible GSS 1.5
xaa_234 187161_E35D_M36I_N37N_R41R_I62I_L63L_A71A_N83N_C95C	Susceptible	Susceptible	Susceptible	Susceptible	Susceptible			Susceptible		Susceptible	Susceptible	Susceptible	Susceptible		Susceptible		Susceptible	Susceptible	Susceptible	Susceptible	Susceptible	Susceptible		Susceptible	Susceptible		Susceptible		Susceptible		Susceptible	Susceptible	Susceptible	Susceptible		Susceptible	Susceptible GSS 1.5		Susceptible GSS 1.5		Susceptible GSS 1.5		Susceptible GSS 1.5	Susceptible GSS 1.5	Susceptible GSS 1	Susceptible GSS 1.5		Susceptible GSS 1.5
xaa_235 187161_E35D_M36I_N37N_R41R_I62I_L63L_A71A_N83N_C95R	Susceptible	Susceptible	Susceptible	Susceptible	Susceptible			Susceptible		Susceptible	Susceptible	Susceptible	Susceptible		Susceptible		Susceptible	Susceptible	Susceptible	Susceptible	Susceptible	Susceptible		Susceptible	Susceptible		Susceptible		Susceptible		Susceptible	Susceptible	Susceptible	Susceptible		Susceptible	Susceptible GSS 1.5		Susceptible GSS 1.5		Susceptible GSS 1.5		Susceptible GSS 1.5	Susceptible GSS 1.5	Susceptible GSS 1	Susceptible GSS 1.5		Susceptible GSS 1.5
xaa_236 187161_E35D_M36I_N37N_R41R_I62I_L63L_A71V_N83D_C95C	Susceptible	Susceptible	Susceptible	Susceptible	Susceptible			Susceptible		Susceptible	Susceptible	Susceptible	Susceptible		Susceptible		Susceptible	Susceptible	Susceptible	Susceptible	Susceptible	Susceptible		Susceptible	Susceptible		Potential Low-Level Resistance		Susceptible		Potential Low-Level Resistance	Susceptible	Low-Level Resistance	Potential Low-Level Resistance		Low-Level Resistance	Susceptible GSS 1.5		Susceptible GSS 1.5		Susceptible GSS 1.5		Susceptible GSS 1.5	Susceptible GSS 1.5	Susceptible GSS 1	Susceptible GSS 1.5		Susceptible GSS 1.5
xaa_237 187161_E35D_M36I_N37N_R41R_I62I_L63L_A71V_N83D_C95R	Susceptible	Susceptible	Susceptible	Susceptible	Susceptible			Susceptible		Susceptible	Susceptible	Susceptible	Susceptible		Susceptible		Susceptible	Susceptible	Susceptible	Susceptible	Susceptible	Susceptible		Susceptible	Susceptible		Potential Low-Level Resistance		Susceptible		Potential Low-Level Resistance	Susceptible	Low-Level Resistance	Potential Low-Level Resistance		Low-Level Resistance	Susceptible GSS 1.5		Susceptible GSS 1.5		Susceptible GSS 1.5		Susceptible GSS 1.5	Susceptible GSS 1.5	Susceptible GSS 1	Susceptible GSS 1.5		Susceptible GSS 1.5
xaa_238 187161_E35D_M36I_N37N_R41R_I62I_L63L_A71V_N83N_C95C	Susceptible	Susceptible	Susceptible	Susceptible	Susceptible			Susceptible		Susceptible	Susceptible	Susceptible	Susceptible		Susceptible		Susceptible	Susceptible	Susceptible	Susceptible	Susceptible	Susceptible		Susceptible	Susceptible		Susceptible		Susceptible		Susceptible	Susceptible	Susceptible	Susceptible		Susceptible	Susceptible GSS 1.5		Susceptible GSS 1.5		Susceptible GSS 1.5		Susceptible GSS 1.5	Susceptible GSS 1.5	Susceptible GSS 1	Susceptible GSS 1.5		Susceptible GSS 1.5
xaa_239 187161_E35D_M36I_N37N_R41R_I62I_L63L_A71V_N83N_C95R	Susceptible	Susceptible	Susceptible	Susceptible	Susceptible			Susceptible		Susceptible	Susceptible	Susceptible	Susceptible		Susceptible		Susceptible	Susceptible	Susceptible	Susceptible	Susceptible	Susceptible		Susceptible	Susceptible		Susceptible		Susceptible		Susceptible	Susceptible	Susceptible	Susceptible		Susceptible	Susceptible GSS 1.5		Susceptible GSS 1.5		Susceptible GSS 1.5		Susceptible GSS 1.5	Susceptible GSS 1.5	Susceptible GSS 1	Susceptible GSS 1.5		Susceptible GSS 1.5
xaa_240 187161_E35D_M36I_N37N_R41R_I62I_L63P_A71A_N83D_C95C	Susceptible	Susceptible	Susceptible	Susceptible	Susceptible			Susceptible		Susceptible	Susceptible	Susceptible	Susceptible		Susceptible		Susceptible	Susceptible	Susceptible	Susceptible	Susceptible	Susceptible		Susceptible	Susceptible		Potential Low-Level Resistance		Susceptible		Potential Low-Level Resistance	Susceptible	Low-Level Resistance	Potential Low-Level Resistance		Low-Level Resistance	Susceptible GSS 1.5		Susceptible GSS 1.5		Susceptible GSS 1.5		Susceptible GSS 1.5	Susceptible GSS 1.5	Susceptible GSS 1	Susceptible GSS 1.5		Susceptible GSS 1.5
xaa_241 187161_E35D_M36I_N37N_R41R_I62I_L63P_A71A_N83D_C95R	Susceptible	Susceptible	Susceptible	Susceptible	Susceptible			Susceptible		Susceptible	Susceptible	Susceptible	Susceptible		Susceptible		Susceptible	Susceptible	Susceptible	Susceptible	Susceptible	Susceptible		Susceptible	Susceptible		Potential Low-Level Resistance		Susceptible		Potential Low-Level Resistance	Susceptible	Low-Level Resistance	Potential Low-Level Resistance		Low-Level Resistance	Susceptible GSS 1.5		Susceptible GSS 1.5		Susceptible GSS 1.5		Susceptible GSS 1.5	Susceptible GSS 1.5	Susceptible GSS 1	Susceptible GSS 1.5		Susceptible GSS 1.5
xaa_242 187161_E35D_M36I_N37N_R41R_I62I_L63P_A71A_N83N_C95C	Susceptible	Susceptible	Susceptible	Susceptible	Susceptible			Susceptible		Susceptible	Susceptible	Susceptible	Susceptible		Susceptible		Susceptible	Susceptible	Susceptible	Susceptible	Susceptible	Susceptible		Susceptible	Susceptible		Susceptible		Susceptible		Susceptible	Susceptible	Susceptible	Susceptible		Susceptible	Susceptible GSS 1.5		Susceptible GSS 1.5		Susceptible GSS 1.5		Susceptible GSS 1.5	Susceptible GSS 1.5	Susceptible GSS 1	Susceptible GSS 1.5		Susceptible GSS 1.5
xaa_243 187161_E35D_M36I_N37N_R41R_I62I_L63P_A71A_N83N_C95R	Susceptible	Susceptible	Susceptible	Susceptible	Susceptible			Susceptible		Susceptible	Susceptible	Susceptible	Susceptible		Susceptible		Susceptible	Susceptible	Susceptible	Susceptible	Susceptible	Susceptible		Susceptible	Susceptible		Susceptible		Susceptible		Susceptible	Susceptible	Susceptible	Susceptible		Susceptible	Susceptible GSS 1.5		Susceptible GSS 1.5		Susceptible GSS 1.5		Susceptible GSS 1.5	Susceptible GSS 1.5	Susceptible GSS 1	Susceptible GSS 1.5		Susceptible GSS 1.5
xaa_244 187161_E35D_M36I_N37N_R41R_I62I_L63P_A71V_N83D_C95C	Susceptible	Susceptible	Susceptible	Susceptible	Susceptible			Susceptible		Susceptible	Susceptible	Susceptible	Susceptible		Susceptible		Susceptible	Susceptible	Susceptible	Susceptible	Susceptible	Susceptible		Susceptible	Susceptible		Potential Low-Level Resistance		Susceptible		Potential Low-Level Resistance	Susceptible	Low-Level Resistance	Potential Low-Level Resistance		Low-Level Resistance	Susceptible GSS 1.5		Susceptible GSS 1.5		Susceptible GSS 1.5		Susceptible GSS 1.5	Susceptible GSS 1.5	Susceptible GSS 1	Susceptible GSS 1.5		Susceptible GSS 1.5
xaa_245 187161_E35D_M36I_N37N_R41R_I62I_L63P_A71V_N83N_C95C	Susceptible	Susceptible	Susceptible	Susceptible	Susceptible			Susceptible		Susceptible	Susceptible	Susceptible	Susceptible		Susceptible		Susceptible	Susceptible	Susceptible	Susceptible	Susceptible	Susceptible		Susceptible	Susceptible		Susceptible		Susceptible		Susceptible	Susceptible	Susceptible	Susceptible		Susceptible	Susceptible GSS 1.5		Susceptible GSS 1.5		Susceptible GSS 1.5		Susceptible GSS 1.5	Susceptible GSS 1.5	Susceptible GSS 1	Susceptible GSS 1.5		Susceptible GSS 1.5
xaa_246 187161_E35D_M36I_N37N_R41R_I62I_L63P_A71V_N83N_C95R	Susceptible	Susceptible	Susceptible	Susceptible	Susceptible			Susceptible		Susceptible	Susceptible	Susceptible	Susceptible		Susceptible		Susceptible	Susceptible	Susceptible	Susceptible	Susceptible	Susceptible		Susceptible	Susceptible		Susceptible		Susceptible		Susceptible	Susceptible	Susceptible	Susceptible		Susceptible	Susceptible GSS 1.5		Susceptible GSS 1.5		Susceptible GSS 1.5		Susceptible GSS 1.5	Susceptible GSS 1.5	Susceptible GSS 1	Susceptible GSS 1.5		Susceptible GSS 1.5
xaa_247 187161_E35D_M36I_N37N_R41R_I62L_L63L_A71A_N83D_C95C	Susceptible	Susceptible	Susceptible	Susceptible	Susceptible			Susceptible		Susceptible	Susceptible	Susceptible	Susceptible		Susceptible		Susceptible	Susceptible	Susceptible	Susceptible	Susceptible	Susceptible		Susceptible	Susceptible		Potential Low-Level Resistance		Susceptible		Potential Low-Level Resistance	Susceptible	Low-Level Resistance	Potential Low-Level Resistance		Low-Level Resistance	Susceptible GSS 1.5		Susceptible GSS 1.5		Susceptible GSS 1.5		Susceptible GSS 1.5	Susceptible GSS 1.5	Susceptible GSS 1	Susceptible GSS 1.5		Susceptible GSS 1.5
xaa_248 187161_E35D_M36I_N37N_R41R_I62L_L63L_A71A_N83D_C95R	Susceptible	Susceptible	Susceptible	Susceptible	Susceptible			Susceptible		Susceptible	Susceptible	Susceptible	Susceptible		Susceptible		Susceptible	Susceptible	Susceptible	Susceptible	Susceptible	Susceptible		Susceptible	Susceptible		Potential Low-Level Resistance		Susceptible		Potential Low-Level Resistance	Susceptible	Low-Level Resistance	Potential Low-Level Resistance		Low-Level Resistance	Susceptible GSS 1.5		Susceptible GSS 1.5		Susceptible GSS 1.5		Susceptible GSS 1.5	Susceptible GSS 1.5	Susceptible GSS 1	Susceptible GSS 1.5		Susceptible GSS 1.5
xaa_249 187161_E35D_M36I_N37N_R41R_I62L_L63L_A71A_N83N_C95C	Susceptible	Susceptible	Susceptible	Susceptible	Susceptible			Susceptible		Susceptible	Susceptible	Susceptible	Susceptible		Susceptible		Susceptible	Susceptible	Susceptible	Susceptible	Susceptible	Susceptible		Susceptible	Susceptible		Susceptible		Susceptible		Susceptible	Susceptible	Susceptible	Susceptible		Susceptible	Susceptible GSS 1.5		Susceptible GSS 1.5		Susceptible GSS 1.5		Susceptible GSS 1.5	Susceptible GSS 1.5	Susceptible GSS 1	Susceptible GSS 1.5		Susceptible GSS 1.5
xaa_250 187161_E35D_M36I_N37N_R41R_I62L_L63L_A71A_N83N_C95R	Susceptible	Susceptible	Susceptible	Susceptible	Susceptible			Susceptible		Susceptible	Susceptible	Susceptible	Susceptible		Susceptible		Susceptible	Susceptible	Susceptible	Susceptible	Susceptible	Susceptible		Susceptible	Susceptible		Susceptible		Susceptible		Susceptible	Susceptible	Susceptible	Susceptible		Susceptible	Susceptible GSS 1.5		Susceptible GSS 1.5		Susceptible GSS 1.5		Susceptible GSS 1.5	Susceptible GSS 1.5	Susceptible GSS 1	Susceptible GSS 1.5		Susceptible GSS 1.5
xaa_251 187161_E35D_M36I_N37N_R41R_I62L_L63L_A71V_N83D_C95C	Susceptible	Susceptible	Susceptible	Susceptible	Susceptible			Susceptible		Susceptible	Susceptible	Susceptible	Susceptible		Susceptible		Susceptible	Susceptible	Susceptible	Susceptible	Susceptible	Susceptible		Susceptible	Susceptible		Potential Low-Level Resistance		Susceptible		Potential Low-Level Resistance	Susceptible	Low-Level Resistance	Potential Low-Level Resistance		Low-Level Resistance	Susceptible GSS 1.5		Susceptible GSS 1.5		Susceptible GSS 1.5		Susceptible GSS 1.5	Susceptible GSS 1.5	Susceptible GSS 1	Susceptible GSS 1.5		Susceptible GSS 1.5
xaa_252 187161_E35D_M36I_N37N_R41R_I62L_L63L_A71V_N83D_C95R	Susceptible	Susceptible	Susceptible	Susceptible	Susceptible			Susceptible		Susceptible	Susceptible	Susceptible	Susceptible		Susceptible		Susceptible	Susceptible	Susceptible	Susceptible	Susceptible	Susceptible		Susceptible	Susceptible		Potential Low-Level Resistance		Susceptible		Potential Low-Level Resistance	Susceptible	Low-Level Resistance	Potential Low-Level Resistance		Low-Level Resistance	Susceptible GSS 1.5		Susceptible GSS 1.5		Susceptible GSS 1.5		Susceptible GSS 1.5	Susceptible GSS 1.5	Susceptible GSS 1	Susceptible GSS 1.5		Susceptible GSS 1.5
xaa_253 187161_E35D_M36I_N37N_R41R_I62L_L63L_A71V_N83N_C95C	Susceptible	Susceptible	Susceptible	Susceptible	Susceptible			Susceptible		Susceptible	Susceptible	Susceptible	Susceptible		Susceptible		Susceptible	Susceptible	Susceptible	Susceptible	Susceptible	Susceptible		Susceptible	Susceptible		Susceptible		Susceptible		Susceptible	Susceptible	Susceptible	Susceptible		Susceptible	Susceptible GSS 1.5		Susceptible GSS 1.5		Susceptible GSS 1.5		Susceptible GSS 1.5	Susceptible GSS 1.5	Susceptible GSS 1	Susceptible GSS 1.5		Susceptible GSS 1.5
xaa_254 187161_E35D_M36I_N37N_R41R_I62L_L63L_A71V_N83N_C95R	Susceptible	Susceptible	Susceptible	Susceptible	Susceptible			Susceptible		Susceptible	Susceptible	Susceptible	Susceptible		Susceptible		Susceptible	Susceptible	Susceptible	Susceptible	Susceptible	Susceptible		Susceptible	Susceptible		Susceptible		Susceptible		Susceptible	Susceptible	Susceptible	Susceptible		Susceptible	Susceptible GSS 1.5		Susceptible GSS 1.5		Susceptible GSS 1.5		Susceptible GSS 1.5	Susceptible GSS 1.5	Susceptible GSS 1	Susceptible GSS 1.5		Susceptible GSS 1.5
xaa_255 187161_E35D_M36I_N37N_R41R_I62L_L63P_A71A_N83D_C95C	Susceptible	Susceptible	Susceptible	Susceptible	Susceptible			Susceptible		Susceptible	Susceptible	Susceptible	Susceptible		Susceptible		Susceptible	Susceptible	Susceptible	Susceptible	Susceptible	Susceptible		Susceptible	Susceptible		Potential Low-Level Resistance		Susceptible		Potential Low-Level Resistance	Susceptible	Low-Level Resistance	Potential Low-Level Resistance		Low-Level Resistance	Susceptible GSS 1.5		Susceptible GSS 1.5		Susceptible GSS 1.5		Susceptible GSS 1.5	Susceptible GSS 1.5	Susceptible GSS 1	Susceptible GSS 1.5		Susceptible GSS 1.5
xaa_256 187161_E35D_M36I_N37N_R41R_I62L_L63P_A71A_N83D_C95R	Susceptible	Susceptible	Susceptible	Susceptible	Susceptible			Susceptible		Susceptible	Susceptible	Susceptible	Susceptible		Susceptible		Susceptible	Susceptible	Susceptible	Susceptible	Susceptible	Susceptible		Susceptible	Susceptible		Potential Low-Level Resistance		Susceptible		Potential Low-Level Resistance	Susceptible	Low-Level Resistance	Potential Low-Level Resistance		Low-Level Resistance	Susceptible GSS 1.5		Susceptible GSS 1.5		Susceptible GSS 1.5		Susceptible GSS 1.5	Susceptible GSS 1.5	Susceptible GSS 1	Susceptible GSS 1.5		Susceptible GSS 1.5
xaa_257 187161_E35D_M36I_N37N_R41R_I62L_L63P_A71A_N83N_C95C	Susceptible	Susceptible	Susceptible	Susceptible	Susceptible			Susceptible		Susceptible	Susceptible	Susceptible	Susceptible		Susceptible		Susceptible	Susceptible	Susceptible	Susceptible	Susceptible	Susceptible		Susceptible	Susceptible		Susceptible		Susceptible		Susceptible	Susceptible	Susceptible	Susceptible		Susceptible	Susceptible GSS 1.5		Susceptible GSS 1.5		Susceptible GSS 1.5		Susceptible GSS 1.5	Susceptible GSS 1.5	Susceptible GSS 1	Susceptible GSS 1.5		Susceptible GSS 1.5
xaa_258 187161_E35D_M36I_N37N_R41R_I62L_L63P_A71A_N83N_C95R	Susceptible	Susceptible	Susceptible	Susceptible	Susceptible			Susceptible		Susceptible	Susceptible	Susceptible	Susceptible		Susceptible		Susceptible	Susceptible	Susceptible	Susceptible	Susceptible	Susceptible		Susceptible	Susceptible		Susceptible		Susceptible		Susceptible	Susceptible	Susceptible	Susceptible		Susceptible	Susceptible GSS 1.5		Susceptible GSS 1.5		Susceptible GSS 1.5		Susceptible GSS 1.5	Susceptible GSS 1.5	Susceptible GSS 1	Susceptible GSS 1.5		Susceptible GSS 1.5
xaa_259 187161_E35D_M36I_N37N_R41R_I62L_L63P_A71V_N83D_C95R	Susceptible	Susceptible	Susceptible	Susceptible	Susceptible			Susceptible		Susceptible	Susceptible	Susceptible	Susceptible		Susceptible		Susceptible	Susceptible	Susceptible	Susceptible	Susceptible	Susceptible		Susceptible	Susceptible		Potential Low-Level Resistance		Susceptible		Potential Low-Level Resistance	Susceptible	Low-Level Resistance	Potential Low-Level Resistance		Low-Level Resistance	Susceptible GSS 1.5		Susceptible GSS 1.5		Susceptible GSS 1.5		Susceptible GSS 1.5	Susceptible GSS 1.5	Susceptible GSS 1	Susceptible GSS 1.5		Susceptible GSS 1.5
xaa_260 187161_E35D_M36I_N37S_R41K_I62L_L63L_A71A_N83D_C95R	Susceptible	Susceptible	Susceptible	Susceptible	Susceptible			Susceptible		Susceptible	Susceptible	Susceptible	Susceptible		Susceptible		Susceptible	Susceptible	Susceptible	Susceptible	Susceptible	Susceptible		Susceptible	Susceptible		Potential Low-Level Resistance		Susceptible		Potential Low-Level Resistance	Susceptible	Low-Level Resistance	Potential Low-Level Resistance		Low-Level Resistance	Susceptible GSS 1.5		Susceptible GSS 1.5		Susceptible GSS 1.5		Susceptible GSS 1.5	Susceptible GSS 1.5	Susceptible GSS 1	Susceptible GSS 1.5		Susceptible GSS 1.5
xaa_261 187161_E35D_M36I_N37S_R41R_I62I_L63L_A71A_N83D_C95R	Susceptible	Susceptible	Susceptible	Susceptible	Susceptible			Susceptible		Susceptible	Susceptible	Susceptible	Susceptible		Susceptible		Susceptible	Susceptible	Susceptible	Susceptible	Susceptible	Susceptible		Susceptible	Susceptible		Potential Low-Level Resistance		Susceptible		Potential Low-Level Resistance	Susceptible	Low-Level Resistance	Potential Low-Level Resistance		Low-Level Resistance	Susceptible GSS 1.5		Susceptible GSS 1.5		Susceptible GSS 1.5		Susceptible GSS 1.5	Susceptible GSS 1.5	Susceptible GSS 1	Susceptible GSS 1.5		Susceptible GSS 1.5
xaa_262 187161_E35D_M36I_N37S_R41R_I62I_L63L_A71A_N83N_C95C	Susceptible	Susceptible	Susceptible	Susceptible	Susceptible			Susceptible		Susceptible	Susceptible	Susceptible	Susceptible		Susceptible		Susceptible	Susceptible	Susceptible	Susceptible	Susceptible	Susceptible		Susceptible	Susceptible		Susceptible		Susceptible		Susceptible	Susceptible	Susceptible	Susceptible		Susceptible	Susceptible GSS 1.5		Susceptible GSS 1.5		Susceptible GSS 1.5		Susceptible GSS 1.5	Susceptible GSS 1.5	Susceptible GSS 1	Susceptible GSS 1.5		Susceptible GSS 1.5
xaa_263 187161_E35D_M36I_N37S_R41R_I62L_L63L_A71A_N83D_C95C	Susceptible	Susceptible	Susceptible	Susceptible	Susceptible			Susceptible		Susceptible	Susceptible	Susceptible	Susceptible		Susceptible		Susceptible	Susceptible	Susceptible	Susceptible	Susceptible	Susceptible		Susceptible	Susceptible		Potential Low-Level Resistance		Susceptible		Potential Low-Level Resistance	Susceptible	Low-Level Resistance	Potential Low-Level Resistance		Low-Level Resistance	Susceptible GSS 1.5		Susceptible GSS 1.5		Susceptible GSS 1.5		Susceptible GSS 1.5	Susceptible GSS 1.5	Susceptible GSS 1	Susceptible GSS 1.5		Susceptible GSS 1.5
xaa_264 187161_E35D_M36I_N37S_R41R_I62L_L63L_A71A_N83D_C95R	Susceptible	Susceptible	Susceptible	Susceptible	Susceptible			Susceptible		Susceptible	Susceptible	Susceptible	Susceptible		Susceptible		Susceptible	Susceptible	Susceptible	Susceptible	Susceptible	Susceptible		Susceptible	Susceptible		Potential Low-Level Resistance		Susceptible		Potential Low-Level Resistance	Susceptible	Low-Level Resistance	Potential Low-Level Resistance		Low-Level Resistance	Susceptible GSS 1.5		Susceptible GSS 1.5		Susceptible GSS 1.5		Susceptible GSS 1.5	Susceptible GSS 1.5	Susceptible GSS 1	Susceptible GSS 1.5		Susceptible GSS 1.5
xaa_265 187161_E35D_M36I_N37S_R41R_I62L_L63L_A71A_N83N_C95C	Susceptible	Susceptible	Susceptible	Susceptible	Susceptible			Susceptible		Susceptible	Susceptible	Susceptible	Susceptible		Susceptible		Susceptible	Susceptible	Susceptible	Susceptible	Susceptible	Susceptible		Susceptible	Susceptible		Susceptible		Susceptible		Susceptible	Susceptible	Susceptible	Susceptible		Susceptible	Susceptible GSS 1.5		Susceptible GSS 1.5		Susceptible GSS 1.5		Susceptible GSS 1.5	Susceptible GSS 1.5	Susceptible GSS 1	Susceptible GSS 1.5		Susceptible GSS 1.5
xaa_266 187161_E35D_M36I_N37S_R41R_I62L_L63L_A71A_N83N_C95R	Susceptible	Susceptible	Susceptible	Susceptible	Susceptible			Susceptible		Susceptible	Susceptible	Susceptible	Susceptible		Susceptible		Susceptible	Susceptible	Susceptible	Susceptible	Susceptible	Susceptible		Susceptible	Susceptible		Susceptible		Susceptible		Susceptible	Susceptible	Susceptible	Susceptible		Susceptible	Susceptible GSS 1.5		Susceptible GSS 1.5		Susceptible GSS 1.5		Susceptible GSS 1.5	Susceptible GSS 1.5	Susceptible GSS 1	Susceptible GSS 1.5		Susceptible GSS 1.5
xaa_267 187161_E35D_M36I_N37S_R41R_I62L_L63P_A71A_N83D_C95C	Susceptible	Susceptible	Susceptible	Susceptible	Susceptible			Susceptible		Susceptible	Susceptible	Susceptible	Susceptible		Susceptible		Susceptible	Susceptible	Susceptible	Susceptible	Susceptible	Susceptible		Susceptible	Susceptible		Potential Low-Level Resistance		Susceptible		Potential Low-Level Resistance	Susceptible	Low-Level Resistance	Potential Low-Level Resistance		Low-Level Resistance	Susceptible GSS 1.5		Susceptible GSS 1.5		Susceptible GSS 1.5		Susceptible GSS 1.5	Susceptible GSS 1.5	Susceptible GSS 1	Susceptible GSS 1.5		Susceptible GSS 1.5
xaa_268 187161_E35D_M36I_N37S_R41R_I62L_L63P_A71A_N83D_C95R	Susceptible	Susceptible	Susceptible	Susceptible	Susceptible			Susceptible		Susceptible	Susceptible	Susceptible	Susceptible		Susceptible		Susceptible	Susceptible	Susceptible	Susceptible	Susceptible	Susceptible		Susceptible	Susceptible		Potential Low-Level Resistance		Susceptible		Potential Low-Level Resistance	Susceptible	Low-Level Resistance	Potential Low-Level Resistance		Low-Level Resistance	Susceptible GSS 1.5		Susceptible GSS 1.5		Susceptible GSS 1.5		Susceptible GSS 1.5	Susceptible GSS 1.5	Susceptible GSS 1	Susceptible GSS 1.5		Susceptible GSS 1.5
xaa_269 187161_E35D_M36I_N37S_R41R_I62L_L63P_A71A_N83N_C95C	Susceptible	Susceptible	Susceptible	Susceptible	Susceptible			Susceptible		Susceptible	Susceptible	Susceptible	Susceptible		Susceptible		Susceptible	Susceptible	Susceptible	Susceptible	Susceptible	Susceptible		Susceptible	Susceptible		Susceptible		Susceptible		Susceptible	Susceptible	Susceptible	Susceptible		Susceptible	Susceptible GSS 1.5		Susceptible GSS 1.5		Susceptible GSS 1.5		Susceptible GSS 1.5	Susceptible GSS 1.5	Susceptible GSS 1	Susceptible GSS 1.5		Susceptible GSS 1.5
xaa_270 187161_E35D_M36I_N37S_R41R_I62L_L63P_A71A_N83N_C95R	Susceptible	Susceptible	Susceptible	Susceptible	Susceptible			Susceptible		Susceptible	Susceptible	Susceptible	Susceptible		Susceptible		Susceptible	Susceptible	Susceptible	Susceptible	Susceptible	Susceptible		Susceptible	Susceptible		Susceptible		Susceptible		Susceptible	Susceptible	Susceptible	Susceptible		Susceptible	Susceptible GSS 1.5		Susceptible GSS 1.5		Susceptible GSS 1.5		Susceptible GSS 1.5	Susceptible GSS 1.5	Susceptible GSS 1	Susceptible GSS 1.5		Susceptible GSS 1.5
xaa_271 187161_E35D_M36I_N37S_R41R_I62L_L63P_A71V_N83D_C95C	Susceptible	Susceptible	Susceptible	Susceptible	Susceptible			Susceptible		Susceptible	Susceptible	Susceptible	Susceptible		Susceptible		Susceptible	Susceptible	Susceptible	Susceptible	Susceptible	Susceptible		Susceptible	Susceptible		Potential Low-Level Resistance		Susceptible		Potential Low-Level Resistance	Susceptible	Low-Level Resistance	Potential Low-Level Resistance		Low-Level Resistance	Susceptible GSS 1.5		Susceptible GSS 1.5		Susceptible GSS 1.5		Susceptible GSS 1.5	Susceptible GSS 1.5	Susceptible GSS 1	Susceptible GSS 1.5		Susceptible GSS 1.5
xaa_272 187161_E35D_M36I_N37S_R41R_I62L_L63P_A71V_N83D_C95R	Susceptible	Susceptible	Susceptible	Susceptible	Susceptible			Susceptible		Susceptible	Susceptible	Susceptible	Susceptible		Susceptible		Susceptible	Susceptible	Susceptible	Susceptible	Susceptible	Susceptible		Susceptible	Susceptible		Potential Low-Level Resistance		Susceptible		Potential Low-Level Resistance	Susceptible	Low-Level Resistance	Potential Low-Level Resistance		Low-Level Resistance	Susceptible GSS 1.5		Susceptible GSS 1.5		Susceptible GSS 1.5		Susceptible GSS 1.5	Susceptible GSS 1.5	Susceptible GSS 1	Susceptible GSS 1.5		Susceptible GSS 1.5
xaa_273 187161_E35D_M36I_N37S_R41R_I62L_L63P_A71V_N83N_C95C	Susceptible	Susceptible	Susceptible	Susceptible	Susceptible			Susceptible		Susceptible	Susceptible	Susceptible	Susceptible		Susceptible		Susceptible	Susceptible	Susceptible	Susceptible	Susceptible	Susceptible		Susceptible	Susceptible		Susceptible		Susceptible		Susceptible	Susceptible	Susceptible	Susceptible		Susceptible	Susceptible GSS 1.5		Susceptible GSS 1.5		Susceptible GSS 1.5		Susceptible GSS 1.5	Susceptible GSS 1.5	Susceptible GSS 1	Susceptible GSS 1.5		Susceptible GSS 1.5
xaa_274 187161_E35D_M36I_N37S_R41R_I62L_L63P_A71V_N83N_C95R	Susceptible	Susceptible	Susceptible	Susceptible	Susceptible			Susceptible		Susceptible	Susceptible	Susceptible	Susceptible		Susceptible		Susceptible	Susceptible	Susceptible	Susceptible	Susceptible	Susceptible		Susceptible	Susceptible		Susceptible		Susceptible		Susceptible	Susceptible	Susceptible	Susceptible		Susceptible	Susceptible GSS 1.5		Susceptible GSS 1.5		Susceptible GSS 1.5		Susceptible GSS 1.5	Susceptible GSS 1.5	Susceptible GSS 1	Susceptible GSS 1.5		Susceptible GSS 1.5
xaa_275 187161_E35D_M36I_N37Y_R41K_I62I_L63L_A71A_N83D_C95C	Susceptible	Susceptible	Susceptible	Susceptible	Susceptible			Susceptible		Susceptible	Susceptible	Susceptible	Susceptible		Susceptible		Susceptible	Susceptible	Susceptible	Susceptible	Susceptible	Susceptible		Susceptible	Susceptible		Potential Low-Level Resistance		Susceptible		Potential Low-Level Resistance	Susceptible	Low-Level Resistance	Potential Low-Level Resistance		Low-Level Resistance	Susceptible GSS 1.5		Susceptible GSS 1.5		Susceptible GSS 1.5		Susceptible GSS 1.5	Susceptible GSS 1.5	Susceptible GSS 1	Susceptible GSS 1.5		Susceptible GSS 1.5
xaa_276 187161_E35D_M36I_N37Y_R41K_I62I_L63L_A71A_N83D_C95R	Susceptible	Susceptible	Susceptible	Susceptible	Susceptible			Susceptible		Susceptible	Susceptible	Susceptible	Susceptible		Susceptible		Susceptible	Susceptible	Susceptible	Susceptible	Susceptible	Susceptible		Susceptible	Susceptible		Potential Low-Level Resistance		Susceptible		Potential Low-Level Resistance	Susceptible	Low-Level Resistance	Potential Low-Level Resistance		Low-Level Resistance	Susceptible GSS 1.5		Susceptible GSS 1.5		Susceptible GSS 1.5		Susceptible GSS 1.5	Susceptible GSS 1.5	Susceptible GSS 1	Susceptible GSS 1.5		Susceptible GSS 1.5
xaa_277 187161_E35D_M36I_N37Y_R41K_I62I_L63L_A71A_N83N_C95C	Susceptible	Susceptible	Susceptible	Susceptible	Susceptible			Susceptible		Susceptible	Susceptible	Susceptible	Susceptible		Susceptible		Susceptible	Susceptible	Susceptible	Susceptible	Susceptible	Susceptible		Susceptible	Susceptible		Susceptible		Susceptible		Susceptible	Susceptible	Susceptible	Susceptible		Susceptible	Susceptible GSS 1.5		Susceptible GSS 1.5		Susceptible GSS 1.5		Susceptible GSS 1.5	Susceptible GSS 1.5	Susceptible GSS 1	Susceptible GSS 1.5		Susceptible GSS 1.5
xaa_278 187161_E35D_M36I_N37Y_R41K_I62I_L63L_A71A_N83N_C95R	Susceptible	Susceptible	Susceptible	Susceptible	Susceptible			Susceptible		Susceptible	Susceptible	Susceptible	Susceptible		Susceptible		Susceptible	Susceptible	Susceptible	Susceptible	Susceptible	Susceptible		Susceptible	Susceptible		Susceptible		Susceptible		Susceptible	Susceptible	Susceptible	Susceptible		Susceptible	Susceptible GSS 1.5		Susceptible GSS 1.5		Susceptible GSS 1.5		Susceptible GSS 1.5	Susceptible GSS 1.5	Susceptible GSS 1	Susceptible GSS 1.5		Susceptible GSS 1.5
xaa_279 187161_E35D_M36I_N37Y_R41K_I62I_L63P_A71A_N83D_C95R	Susceptible	Susceptible	Susceptible	Susceptible	Susceptible			Susceptible		Susceptible	Susceptible	Susceptible	Susceptible		Susceptible		Susceptible	Susceptible	Susceptible	Susceptible	Susceptible	Susceptible		Susceptible	Susceptible		Potential Low-Level Resistance		Susceptible		Potential Low-Level Resistance	Susceptible	Low-Level Resistance	Potential Low-Level Resistance		Low-Level Resistance	Susceptible GSS 1.5		Susceptible GSS 1.5		Susceptible GSS 1.5		Susceptible GSS 1.5	Susceptible GSS 1.5	Susceptible GSS 1	Susceptible GSS 1.5		Susceptible GSS 1.5
xaa_280 187161_E35D_M36I_N37Y_R41K_I62L_L63L_A71A_N83D_C95C	Susceptible	Susceptible	Susceptible	Susceptible	Susceptible			Susceptible		Susceptible	Susceptible	Susceptible	Susceptible		Susceptible		Susceptible	Susceptible	Susceptible	Susceptible	Susceptible	Susceptible		Susceptible	Susceptible		Potential Low-Level Resistance		Susceptible		Potential Low-Level Resistance	Susceptible	Low-Level Resistance	Potential Low-Level Resistance		Low-Level Resistance	Susceptible GSS 1.5		Susceptible GSS 1.5		Susceptible GSS 1.5		Susceptible GSS 1.5	Susceptible GSS 1.5	Susceptible GSS 1	Susceptible GSS 1.5		Susceptible GSS 1.5
xaa_281 187161_E35D_M36I_N37Y_R41K_I62L_L63L_A71A_N83D_C95R	Susceptible	Susceptible	Susceptible	Susceptible	Susceptible			Susceptible		Susceptible	Susceptible	Susceptible	Susceptible		Susceptible		Susceptible	Susceptible	Susceptible	Susceptible	Susceptible	Susceptible		Susceptible	Susceptible		Potential Low-Level Resistance		Susceptible		Potential Low-Level Resistance	Susceptible	Low-Level Resistance	Potential Low-Level Resistance		Low-Level Resistance	Susceptible GSS 1.5		Susceptible GSS 1.5		Susceptible GSS 1.5		Susceptible GSS 1.5	Susceptible GSS 1.5	Susceptible GSS 1	Susceptible GSS 1.5		Susceptible GSS 1.5
xaa_282 187161_E35D_M36I_N37Y_R41K_I62L_L63L_A71A_N83N_C95C	Susceptible	Susceptible	Susceptible	Susceptible	Susceptible			Susceptible		Susceptible	Susceptible	Susceptible	Susceptible		Susceptible		Susceptible	Susceptible	Susceptible	Susceptible	Susceptible	Susceptible		Susceptible	Susceptible		Susceptible		Susceptible		Susceptible	Susceptible	Susceptible	Susceptible		Susceptible	Susceptible GSS 1.5		Susceptible GSS 1.5		Susceptible GSS 1.5		Susceptible GSS 1.5	Susceptible GSS 1.5	Susceptible GSS 1	Susceptible GSS 1.5		Susceptible GSS 1.5
xaa_283 187161_E35D_M36I_N37Y_R41K_I62L_L63L_A71A_N83N_C95R	Susceptible	Susceptible	Susceptible	Susceptible	Susceptible			Susceptible		Susceptible	Susceptible	Susceptible	Susceptible		Susceptible		Susceptible	Susceptible	Susceptible	Susceptible	Susceptible	Susceptible		Susceptible	Susceptible		Susceptible		Susceptible		Susceptible	Susceptible	Susceptible	Susceptible		Susceptible	Susceptible GSS 1.5		Susceptible GSS 1.5		Susceptible GSS 1.5		Susceptible GSS 1.5	Susceptible GSS 1.5	Susceptible GSS 1	Susceptible GSS 1.5		Susceptible GSS 1.5
xaa_284 187161_E35D_M36I_N37Y_R41K_I62L_L63P_A71V_N83D_C95C	Susceptible	Susceptible	Susceptible	Susceptible	Susceptible			Susceptible		Susceptible	Susceptible	Susceptible	Susceptible		Susceptible		Susceptible	Susceptible	Susceptible	Susceptible	Susceptible	Susceptible		Susceptible	Susceptible		Potential Low-Level Resistance		Susceptible		Potential Low-Level Resistance	Susceptible	Low-Level Resistance	Potential Low-Level Resistance		Low-Level Resistance	Susceptible GSS 1.5		Susceptible GSS 1.5		Susceptible GSS 1.5		Susceptible GSS 1.5	Susceptible GSS 1.5	Susceptible GSS 1	Susceptible GSS 1.5		Susceptible GSS 1.5
xaa_285 187161_E35D_M36I_N37Y_R41K_I62L_L63P_A71V_N83N_C95C	Susceptible	Susceptible	Susceptible	Susceptible	Susceptible			Susceptible		Susceptible	Susceptible	Susceptible	Susceptible		Susceptible		Susceptible	Susceptible	Susceptible	Susceptible	Susceptible	Susceptible		Susceptible	Susceptible		Susceptible		Susceptible		Susceptible	Susceptible	Susceptible	Susceptible		Susceptible	Susceptible GSS 1.5		Susceptible GSS 1.5		Susceptible GSS 1.5		Susceptible GSS 1.5	Susceptible GSS 1.5	Susceptible GSS 1	Susceptible GSS 1.5		Susceptible GSS 1.5
xaa_286 187161_E35D_M36I_N37Y_R41R_I62I_L63L_A71A_N83D_C95C	Susceptible	Susceptible	Susceptible	Susceptible	Susceptible			Susceptible		Susceptible	Susceptible	Susceptible	Susceptible		Susceptible		Susceptible	Susceptible	Susceptible	Susceptible	Susceptible	Susceptible		Susceptible	Susceptible		Potential Low-Level Resistance		Susceptible		Potential Low-Level Resistance	Susceptible	Low-Level Resistance	Potential Low-Level Resistance		Low-Level Resistance	Susceptible GSS 1.5		Susceptible GSS 1.5		Susceptible GSS 1.5		Susceptible GSS 1.5	Susceptible GSS 1.5	Susceptible GSS 1	Susceptible GSS 1.5		Susceptible GSS 1.5
xaa_287 187161_E35D_M36I_N37Y_R41R_I62I_L63L_A71A_N83D_C95R	Susceptible	Susceptible	Susceptible	Susceptible	Susceptible			Susceptible		Susceptible	Susceptible	Susceptible	Susceptible		Susceptible		Susceptible	Susceptible	Susceptible	Susceptible	Susceptible	Susceptible		Susceptible	Susceptible		Potential Low-Level Resistance		Susceptible		Potential Low-Level Resistance	Susceptible	Low-Level Resistance	Potential Low-Level Resistance		Low-Level Resistance	Susceptible GSS 1.5		Susceptible GSS 1.5		Susceptible GSS 1.5		Susceptible GSS 1.5	Susceptible GSS 1.5	Susceptible GSS 1	Susceptible GSS 1.5		Susceptible GSS 1.5
xaa_288 187161_E35D_M36I_N37Y_R41R_I62I_L63L_A71A_N83N_C95C	Susceptible	Susceptible	Susceptible	Susceptible	Susceptible			Susceptible		Susceptible	Susceptible	Susceptible	Susceptible		Susceptible		Susceptible	Susceptible	Susceptible	Susceptible	Susceptible	Susceptible		Susceptible	Susceptible		Susceptible		Susceptible		Susceptible	Susceptible	Susceptible	Susceptible		Susceptible	Susceptible GSS 1.5		Susceptible GSS 1.5		Susceptible GSS 1.5		Susceptible GSS 1.5	Susceptible GSS 1.5	Susceptible GSS 1	Susceptible GSS 1.5		Susceptible GSS 1.5
xaa_289 187161_E35D_M36I_N37Y_R41R_I62I_L63L_A71A_N83N_C95R	Susceptible	Susceptible	Susceptible	Susceptible	Susceptible			Susceptible		Susceptible	Susceptible	Susceptible	Susceptible		Susceptible		Susceptible	Susceptible	Susceptible	Susceptible	Susceptible	Susceptible		Susceptible	Susceptible		Susceptible		Susceptible		Susceptible	Susceptible	Susceptible	Susceptible		Susceptible	Susceptible GSS 1.5		Susceptible GSS 1.5		Susceptible GSS 1.5		Susceptible GSS 1.5	Susceptible GSS 1.5	Susceptible GSS 1	Susceptible GSS 1.5		Susceptible GSS 1.5
xaa_290 187161_E35D_M36I_N37Y_R41R_I62I_L63L_A71V_N83D_C95C	Susceptible	Susceptible	Susceptible	Susceptible	Susceptible			Susceptible		Susceptible	Susceptible	Susceptible	Susceptible		Susceptible		Susceptible	Susceptible	Susceptible	Susceptible	Susceptible	Susceptible		Susceptible	Susceptible		Potential Low-Level Resistance		Susceptible		Potential Low-Level Resistance	Susceptible	Low-Level Resistance	Potential Low-Level Resistance		Low-Level Resistance	Susceptible GSS 1.5		Susceptible GSS 1.5		Susceptible GSS 1.5		Susceptible GSS 1.5	Susceptible GSS 1.5	Susceptible GSS 1	Susceptible GSS 1.5		Susceptible GSS 1.5
xaa_291 187161_E35D_M36I_N37Y_R41R_I62I_L63L_A71V_N83D_C95R	Susceptible	Susceptible	Susceptible	Susceptible	Susceptible			Susceptible		Susceptible	Susceptible	Susceptible	Susceptible		Susceptible		Susceptible	Susceptible	Susceptible	Susceptible	Susceptible	Susceptible		Susceptible	Susceptible		Potential Low-Level Resistance		Susceptible		Potential Low-Level Resistance	Susceptible	Low-Level Resistance	Potential Low-Level Resistance		Low-Level Resistance	Susceptible GSS 1.5		Susceptible GSS 1.5		Susceptible GSS 1.5		Susceptible GSS 1.5	Susceptible GSS 1.5	Susceptible GSS 1	Susceptible GSS 1.5		Susceptible GSS 1.5
xaa_292 187161_E35D_M36I_N37Y_R41R_I62I_L63L_A71V_N83N_C95C	Susceptible	Susceptible	Susceptible	Susceptible	Susceptible			Susceptible		Susceptible	Susceptible	Susceptible	Susceptible		Susceptible		Susceptible	Susceptible	Susceptible	Susceptible	Susceptible	Susceptible		Susceptible	Susceptible		Susceptible		Susceptible		Susceptible	Susceptible	Susceptible	Susceptible		Susceptible	Susceptible GSS 1.5		Susceptible GSS 1.5		Susceptible GSS 1.5		Susceptible GSS 1.5	Susceptible GSS 1.5	Susceptible GSS 1	Susceptible GSS 1.5		Susceptible GSS 1.5
xaa_293 187161_E35D_M36I_N37Y_R41R_I62I_L63L_A71V_N83N_C95R	Susceptible	Susceptible	Susceptible	Susceptible	Susceptible			Susceptible		Susceptible	Susceptible	Susceptible	Susceptible		Susceptible		Susceptible	Susceptible	Susceptible	Susceptible	Susceptible	Susceptible		Susceptible	Susceptible		Susceptible		Susceptible		Susceptible	Susceptible	Susceptible	Susceptible		Susceptible	Susceptible GSS 1.5		Susceptible GSS 1.5		Susceptible GSS 1.5		Susceptible GSS 1.5	Susceptible GSS 1.5	Susceptible GSS 1	Susceptible GSS 1.5		Susceptible GSS 1.5
xaa_294 187161_E35D_M36I_N37Y_R41R_I62I_L63P_A71A_N83D_C95C	Susceptible	Susceptible	Susceptible	Susceptible	Susceptible			Susceptible		Susceptible	Susceptible	Susceptible	Susceptible		Susceptible		Susceptible	Susceptible	Susceptible	Susceptible	Susceptible	Susceptible		Susceptible	Susceptible		Potential Low-Level Resistance		Susceptible		Potential Low-Level Resistance	Susceptible	Low-Level Resistance	Potential Low-Level Resistance		Low-Level Resistance	Susceptible GSS 1.5		Susceptible GSS 1.5		Susceptible GSS 1.5		Susceptible GSS 1.5	Susceptible GSS 1.5	Susceptible GSS 1	Susceptible GSS 1.5		Susceptible GSS 1.5
xaa_295 187161_E35D_M36I_N37Y_R41R_I62I_L63P_A71A_N83D_C95R	Susceptible	Susceptible	Susceptible	Susceptible	Susceptible			Susceptible		Susceptible	Susceptible	Susceptible	Susceptible		Susceptible		Susceptible	Susceptible	Susceptible	Susceptible	Susceptible	Susceptible		Susceptible	Susceptible		Potential Low-Level Resistance		Susceptible		Potential Low-Level Resistance	Susceptible	Low-Level Resistance	Potential Low-Level Resistance		Low-Level Resistance	Susceptible GSS 1.5		Susceptible GSS 1.5		Susceptible GSS 1.5		Susceptible GSS 1.5	Susceptible GSS 1.5	Susceptible GSS 1	Susceptible GSS 1.5		Susceptible GSS 1.5
xaa_296 187161_E35D_M36I_N37Y_R41R_I62I_L63P_A71A_N83N_C95C	Susceptible	Susceptible	Susceptible	Susceptible	Susceptible			Susceptible		Susceptible	Susceptible	Susceptible	Susceptible		Susceptible		Susceptible	Susceptible	Susceptible	Susceptible	Susceptible	Susceptible		Susceptible	Susceptible		Susceptible		Susceptible		Susceptible	Susceptible	Susceptible	Susceptible		Susceptible	Susceptible GSS 1.5		Susceptible GSS 1.5		Susceptible GSS 1.5		Susceptible GSS 1.5	Susceptible GSS 1.5	Susceptible GSS 1	Susceptible GSS 1.5		Susceptible GSS 1.5
xaa_297 187161_E35D_M36I_N37Y_R41R_I62I_L63P_A71A_N83N_C95R	Susceptible	Susceptible	Susceptible	Susceptible	Susceptible			Susceptible		Susceptible	Susceptible	Susceptible	Susceptible		Susceptible		Susceptible	Susceptible	Susceptible	Susceptible	Susceptible	Susceptible		Susceptible	Susceptible		Susceptible		Susceptible		Susceptible	Susceptible	Susceptible	Susceptible		Susceptible	Susceptible GSS 1.5		Susceptible GSS 1.5		Susceptible GSS 1.5		Susceptible GSS 1.5	Susceptible GSS 1.5	Susceptible GSS 1	Susceptible GSS 1.5		Susceptible GSS 1.5
xaa_298 187161_E35D_M36I_N37Y_R41R_I62I_L63P_A71V_N83D_C95R	Susceptible	Susceptible	Susceptible	Susceptible	Susceptible			Susceptible		Susceptible	Susceptible	Susceptible	Susceptible		Susceptible		Susceptible	Susceptible	Susceptible	Susceptible	Susceptible	Susceptible		Susceptible	Susceptible		Potential Low-Level Resistance		Susceptible		Potential Low-Level Resistance	Susceptible	Low-Level Resistance	Potential Low-Level Resistance		Low-Level Resistance	Susceptible GSS 1.5		Susceptible GSS 1.5		Susceptible GSS 1.5		Susceptible GSS 1.5	Susceptible GSS 1.5	Susceptible GSS 1	Susceptible GSS 1.5		Susceptible GSS 1.5
xaa_299 187161_E35D_M36I_N37Y_R41R_I62L_L63L_A71A_N83D_C95C	Susceptible	Susceptible	Susceptible	Susceptible	Susceptible			Susceptible		Susceptible	Susceptible	Susceptible	Susceptible		Susceptible		Susceptible	Susceptible	Susceptible	Susceptible	Susceptible	Susceptible		Susceptible	Susceptible		Potential Low-Level Resistance		Susceptible		Potential Low-Level Resistance	Susceptible	Low-Level Resistance	Potential Low-Level Resistance		Low-Level Resistance	Susceptible GSS 1.5		Susceptible GSS 1.5		Susceptible GSS 1.5		Susceptible GSS 1.5	Susceptible GSS 1.5	Susceptible GSS 1	Susceptible GSS 1.5		Susceptible GSS 1.5
xaa_300 187161_E35D_M36I_N37Y_R41R_I62L_L63L_A71A_N83D_C95R	Susceptible	Susceptible	Susceptible	Susceptible	Susceptible			Susceptible		Susceptible	Susceptible	Susceptible	Susceptible		Susceptible		Susceptible	Susceptible	Susceptible	Susceptible	Susceptible	Susceptible		Susceptible	Susceptible		Potential Low-Level Resistance		Susceptible		Potential Low-Level Resistance	Susceptible	Low-Level Resistance	Potential Low-Level Resistance		Low-Level Resistance	Susceptible GSS 1.5		Susceptible GSS 1.5		Susceptible GSS 1.5		Susceptible GSS 1.5	Susceptible GSS 1.5	Susceptible GSS 1	Susceptible GSS 1.5		Susceptible GSS 1.5
xaa_301 187161_E35D_M36I_N37Y_R41R_I62L_L63L_A71A_N83N_C95C	Susceptible	Susceptible	Susceptible	Susceptible	Susceptible			Susceptible		Susceptible	Susceptible	Susceptible	Susceptible		Susceptible		Susceptible	Susceptible	Susceptible	Susceptible	Susceptible	Susceptible		Susceptible	Susceptible		Susceptible		Susceptible		Susceptible	Susceptible	Susceptible	Susceptible		Susceptible	Susceptible GSS 1.5		Susceptible GSS 1.5		Susceptible GSS 1.5		Susceptible GSS 1.5	Susceptible GSS 1.5	Susceptible GSS 1	Susceptible GSS 1.5		Susceptible GSS 1.5
xaa_302 187161_E35D_M36I_N37Y_R41R_I62L_L63L_A71A_N83N_C95R	Susceptible	Susceptible	Susceptible	Susceptible	Susceptible			Susceptible		Susceptible	Susceptible	Susceptible	Susceptible		Susceptible		Susceptible	Susceptible	Susceptible	Susceptible	Susceptible	Susceptible		Susceptible	Susceptible		Susceptible		Susceptible		Susceptible	Susceptible	Susceptible	Susceptible		Susceptible	Susceptible GSS 1.5		Susceptible GSS 1.5		Susceptible GSS 1.5		Susceptible GSS 1.5	Susceptible GSS 1.5	Susceptible GSS 1	Susceptible GSS 1.5		Susceptible GSS 1.5
xaa_303 187161_E35D_M36I_N37Y_R41R_I62L_L63L_A71V_N83D_C95C	Susceptible	Susceptible	Susceptible	Susceptible	Susceptible			Susceptible		Susceptible	Susceptible	Susceptible	Susceptible		Susceptible		Susceptible	Susceptible	Susceptible	Susceptible	Susceptible	Susceptible		Susceptible	Susceptible		Potential Low-Level Resistance		Susceptible		Potential Low-Level Resistance	Susceptible	Low-Level Resistance	Potential Low-Level Resistance		Low-Level Resistance	Susceptible GSS 1.5		Susceptible GSS 1.5		Susceptible GSS 1.5		Susceptible GSS 1.5	Susceptible GSS 1.5	Susceptible GSS 1	Susceptible GSS 1.5		Susceptible GSS 1.5
xaa_304 187161_E35D_M36I_N37Y_R41R_I62L_L63L_A71V_N83D_C95R	Susceptible	Susceptible	Susceptible	Susceptible	Susceptible			Susceptible		Susceptible	Susceptible	Susceptible	Susceptible		Susceptible		Susceptible	Susceptible	Susceptible	Susceptible	Susceptible	Susceptible		Susceptible	Susceptible		Potential Low-Level Resistance		Susceptible		Potential Low-Level Resistance	Susceptible	Low-Level Resistance	Potential Low-Level Resistance		Low-Level Resistance	Susceptible GSS 1.5		Susceptible GSS 1.5		Susceptible GSS 1.5		Susceptible GSS 1.5	Susceptible GSS 1.5	Susceptible GSS 1	Susceptible GSS 1.5		Susceptible GSS 1.5
xaa_305 187161_E35D_M36I_N37Y_R41R_I62L_L63L_A71V_N83N_C95C	Susceptible	Susceptible	Susceptible	Susceptible	Susceptible			Susceptible		Susceptible	Susceptible	Susceptible	Susceptible		Susceptible		Susceptible	Susceptible	Susceptible	Susceptible	Susceptible	Susceptible		Susceptible	Susceptible		Susceptible		Susceptible		Susceptible	Susceptible	Susceptible	Susceptible		Susceptible	Susceptible GSS 1.5		Susceptible GSS 1.5		Susceptible GSS 1.5		Susceptible GSS 1.5	Susceptible GSS 1.5	Susceptible GSS 1	Susceptible GSS 1.5		Susceptible GSS 1.5
xaa_306 187161_E35D_M36I_N37Y_R41R_I62L_L63L_A71V_N83N_C95R	Susceptible	Susceptible	Susceptible	Susceptible	Susceptible			Susceptible		Susceptible	Susceptible	Susceptible	Susceptible		Susceptible		Susceptible	Susceptible	Susceptible	Susceptible	Susceptible	Susceptible		Susceptible	Susceptible		Susceptible		Susceptible		Susceptible	Susceptible	Susceptible	Susceptible		Susceptible	Susceptible GSS 1.5		Susceptible GSS 1.5		Susceptible GSS 1.5		Susceptible GSS 1.5	Susceptible GSS 1.5	Susceptible GSS 1	Susceptible GSS 1.5		Susceptible GSS 1.5
xaa_307 187161_E35D_M36I_N37Y_R41R_I62L_L63P_A71A_N83D_C95C	Susceptible	Susceptible	Susceptible	Susceptible	Susceptible			Susceptible		Susceptible	Susceptible	Susceptible	Susceptible		Susceptible		Susceptible	Susceptible	Susceptible	Susceptible	Susceptible	Susceptible		Susceptible	Susceptible		Potential Low-Level Resistance		Susceptible		Potential Low-Level Resistance	Susceptible	Low-Level Resistance	Potential Low-Level Resistance		Low-Level Resistance	Susceptible GSS 1.5		Susceptible GSS 1.5		Susceptible GSS 1.5		Susceptible GSS 1.5	Susceptible GSS 1.5	Susceptible GSS 1	Susceptible GSS 1.5		Susceptible GSS 1.5
xaa_308 187161_E35D_M36I_N37Y_R41R_I62L_L63P_A71A_N83D_C95R	Susceptible	Susceptible	Susceptible	Susceptible	Susceptible			Susceptible		Susceptible	Susceptible	Susceptible	Susceptible		Susceptible		Susceptible	Susceptible	Susceptible	Susceptible	Susceptible	Susceptible		Susceptible	Susceptible		Potential Low-Level Resistance		Susceptible		Potential Low-Level Resistance	Susceptible	Low-Level Resistance	Potential Low-Level Resistance		Low-Level Resistance	Susceptible GSS 1.5		Susceptible GSS 1.5		Susceptible GSS 1.5		Susceptible GSS 1.5	Susceptible GSS 1.5	Susceptible GSS 1	Susceptible GSS 1.5		Susceptible GSS 1.5
xaa_309 187161_E35D_M36I_N37Y_R41R_I62L_L63P_A71A_N83N_C95C	Susceptible	Susceptible	Susceptible	Susceptible	Susceptible			Susceptible		Susceptible	Susceptible	Susceptible	Susceptible		Susceptible		Susceptible	Susceptible	Susceptible	Susceptible	Susceptible	Susceptible		Susceptible	Susceptible		Susceptible		Susceptible		Susceptible	Susceptible	Susceptible	Susceptible		Susceptible	Susceptible GSS 1.5		Susceptible GSS 1.5		Susceptible GSS 1.5		Susceptible GSS 1.5	Susceptible GSS 1.5	Susceptible GSS 1	Susceptible GSS 1.5		Susceptible GSS 1.5
xaa_310 187161_E35D_M36I_N37Y_R41R_I62L_L63P_A71A_N83N_C95R	Susceptible	Susceptible	Susceptible	Susceptible	Susceptible			Susceptible		Susceptible	Susceptible	Susceptible	Susceptible		Susceptible		Susceptible	Susceptible	Susceptible	Susceptible	Susceptible	Susceptible		Susceptible	Susceptible		Susceptible		Susceptible		Susceptible	Susceptible	Susceptible	Susceptible		Susceptible	Susceptible GSS 1.5		Susceptible GSS 1.5		Susceptible GSS 1.5		Susceptible GSS 1.5	Susceptible GSS 1.5	Susceptible GSS 1	Susceptible GSS 1.5		Susceptible GSS 1.5
xaa_311 187161_E35D_M36I_N37Y_R41R_I62L_L63P_A71V_N83D_C95C	Susceptible	Susceptible	Susceptible	Susceptible	Susceptible			Susceptible		Susceptible	Susceptible	Susceptible	Susceptible		Susceptible		Susceptible	Susceptible	Susceptible	Susceptible	Susceptible	Susceptible		Susceptible	Susceptible		Potential Low-Level Resistance		Susceptible		Potential Low-Level Resistance	Susceptible	Low-Level Resistance	Potential Low-Level Resistance		Low-Level Resistance	Susceptible GSS 1.5		Susceptible GSS 1.5		Susceptible GSS 1.5		Susceptible GSS 1.5	Susceptible GSS 1.5	Susceptible GSS 1	Susceptible GSS 1.5		Susceptible GSS 1.5
xaa_312 187161_E35D_M36I_N37Y_R41R_I62L_L63P_A71V_N83D_C95R	Susceptible	Susceptible	Susceptible	Susceptible	Susceptible			Susceptible		Susceptible	Susceptible	Susceptible	Susceptible		Susceptible		Susceptible	Susceptible	Susceptible	Susceptible	Susceptible	Susceptible		Susceptible	Susceptible		Potential Low-Level Resistance		Susceptible		Potential Low-Level Resistance	Susceptible	Low-Level Resistance	Potential Low-Level Resistance		Low-Level Resistance	Susceptible GSS 1.5		Susceptible GSS 1.5		Susceptible GSS 1.5		Susceptible GSS 1.5	Susceptible GSS 1.5	Susceptible GSS 1	Susceptible GSS 1.5		Susceptible GSS 1.5
xaa_313 187161_E35D_M36I_N37Y_R41R_I62L_L63P_A71V_N83N_C95C	Susceptible	Susceptible	Susceptible	Susceptible	Susceptible			Susceptible		Susceptible	Susceptible	Susceptible	Susceptible		Susceptible		Susceptible	Susceptible	Susceptible	Susceptible	Susceptible	Susceptible		Susceptible	Susceptible		Susceptible		Susceptible		Susceptible	Susceptible	Susceptible	Susceptible		Susceptible	Susceptible GSS 1.5		Susceptible GSS 1.5		Susceptible GSS 1.5		Susceptible GSS 1.5	Susceptible GSS 1.5	Susceptible GSS 1	Susceptible GSS 1.5		Susceptible GSS 1.5
xaa_314 187161_E35D_M36I_N37Y_R41R_I62L_L63P_A71V_N83N_C95R	Susceptible	Susceptible	Susceptible	Susceptible	Susceptible			Susceptible		Susceptible	Susceptible	Susceptible	Susceptible		Susceptible		Susceptible	Susceptible	Susceptible	Susceptible	Susceptible	Susceptible		Susceptible	Susceptible		Susceptible		Susceptible		Susceptible	Susceptible	Susceptible	Susceptible		Susceptible	Susceptible GSS 1.5		Susceptible GSS 1.5		Susceptible GSS 1.5		Susceptible GSS 1.5	Susceptible GSS 1.5	Susceptible GSS 1	Susceptible GSS 1.5		Susceptible GSS 1.5
xaa_315 187161_E35D_M36M_N37C_R41K_I62I_L63L_A71A_N83D_C95C	Susceptible	Susceptible	Susceptible	Susceptible	Susceptible			Susceptible		Susceptible	Susceptible	Susceptible	Susceptible		Susceptible		Susceptible	Susceptible	Susceptible	Susceptible	Susceptible	Susceptible		Susceptible	Susceptible		Potential Low-Level Resistance		Susceptible		Potential Low-Level Resistance	Susceptible	Low-Level Resistance	Potential Low-Level Resistance		Low-Level Resistance	Susceptible GSS 1.5		Susceptible GSS 1.5		Susceptible GSS 1.5		Susceptible GSS 1.5	Susceptible GSS 1.5	Susceptible GSS 1	Susceptible GSS 1.5		Susceptible GSS 1.5
xaa_316 187161_E35D_M36M_N37C_R41K_I62I_L63L_A71A_N83D_C95R	Susceptible	Susceptible	Susceptible	Susceptible	Susceptible			Susceptible		Susceptible	Susceptible	Susceptible	Susceptible		Susceptible		Susceptible	Susceptible	Susceptible	Susceptible	Susceptible	Susceptible		Susceptible	Susceptible		Potential Low-Level Resistance		Susceptible		Potential Low-Level Resistance	Susceptible	Low-Level Resistance	Potential Low-Level Resistance		Low-Level Resistance	Susceptible GSS 1.5		Susceptible GSS 1.5		Susceptible GSS 1.5		Susceptible GSS 1.5	Susceptible GSS 1.5	Susceptible GSS 1	Susceptible GSS 1.5		Susceptible GSS 1.5
xaa_317 187161_E35D_M36M_N37C_R41K_I62I_L63L_A71A_N83N_C95C	Susceptible	Susceptible	Susceptible	Susceptible	Susceptible			Susceptible		Susceptible	Susceptible	Susceptible	Susceptible		Susceptible		Susceptible	Susceptible	Susceptible	Susceptible	Susceptible	Susceptible		Susceptible	Susceptible		Susceptible		Susceptible		Susceptible	Susceptible	Susceptible	Susceptible		Susceptible	Susceptible GSS 1.5		Susceptible GSS 1.5		Susceptible GSS 1.5		Susceptible GSS 1.5	Susceptible GSS 1.5	Susceptible GSS 1	Susceptible GSS 1.5		Susceptible GSS 1.5
xaa_318 187161_E35D_M36M_N37C_R41K_I62I_L63L_A71A_N83N_C95R	Susceptible	Susceptible	Susceptible	Susceptible	Susceptible			Susceptible		Susceptible	Susceptible	Susceptible	Susceptible		Susceptible		Susceptible	Susceptible	Susceptible	Susceptible	Susceptible	Susceptible		Susceptible	Susceptible		Susceptible		Susceptible		Susceptible	Susceptible	Susceptible	Susceptible		Susceptible	Susceptible GSS 1.5		Susceptible GSS 1.5		Susceptible GSS 1.5		Susceptible GSS 1.5	Susceptible GSS 1.5	Susceptible GSS 1	Susceptible GSS 1.5		Susceptible GSS 1.5
xaa_319 187161_E35D_M36M_N37C_R41K_I62I_L63P_A71A_N83D_C95R	Susceptible	Susceptible	Susceptible	Susceptible	Susceptible			Susceptible		Susceptible	Susceptible	Susceptible	Susceptible		Susceptible		Susceptible	Susceptible	Susceptible	Susceptible	Susceptible	Susceptible		Susceptible	Susceptible		Potential Low-Level Resistance		Susceptible		Potential Low-Level Resistance	Susceptible	Low-Level Resistance	Potential Low-Level Resistance		Low-Level Resistance	Susceptible GSS 1.5		Susceptible GSS 1.5		Susceptible GSS 1.5		Susceptible GSS 1.5	Susceptible GSS 1.5	Susceptible GSS 1	Susceptible GSS 1.5		Susceptible GSS 1.5
xaa_320 187161_E35D_M36M_N37C_R41K_I62L_L63L_A71A_N83D_C95R	Susceptible	Susceptible	Susceptible	Susceptible	Susceptible			Susceptible		Susceptible	Susceptible	Susceptible	Susceptible		Susceptible		Susceptible	Susceptible	Susceptible	Susceptible	Susceptible	Susceptible		Susceptible	Susceptible		Potential Low-Level Resistance		Susceptible		Potential Low-Level Resistance	Susceptible	Low-Level Resistance	Potential Low-Level Resistance		Low-Level Resistance	Susceptible GSS 1.5		Susceptible GSS 1.5		Susceptible GSS 1.5		Susceptible GSS 1.5	Susceptible GSS 1.5	Susceptible GSS 1	Susceptible GSS 1.5		Susceptible GSS 1.5
xaa_321 187161_E35D_M36M_N37C_R41R_I62I_L63L_A71A_N83D_C95C	Susceptible	Susceptible	Susceptible	Susceptible	Susceptible			Susceptible		Susceptible	Susceptible	Susceptible	Susceptible		Susceptible		Susceptible	Susceptible	Susceptible	Susceptible	Susceptible	Susceptible		Susceptible	Susceptible		Potential Low-Level Resistance		Susceptible		Potential Low-Level Resistance	Susceptible	Low-Level Resistance	Potential Low-Level Resistance		Low-Level Resistance	Susceptible GSS 1.5		Susceptible GSS 1.5		Susceptible GSS 1.5		Susceptible GSS 1.5	Susceptible GSS 1.5	Susceptible GSS 1	Susceptible GSS 1.5		Susceptible GSS 1.5
xaa_322 187161_E35D_M36M_N37C_R41R_I62I_L63L_A71A_N83D_C95R	Susceptible	Susceptible	Susceptible	Susceptible	Susceptible			Susceptible		Susceptible	Susceptible	Susceptible	Susceptible		Susceptible		Susceptible	Susceptible	Susceptible	Susceptible	Susceptible	Susceptible		Susceptible	Susceptible		Potential Low-Level Resistance		Susceptible		Potential Low-Level Resistance	Susceptible	Low-Level Resistance	Potential Low-Level Resistance		Low-Level Resistance	Susceptible GSS 1.5		Susceptible GSS 1.5		Susceptible GSS 1.5		Susceptible GSS 1.5	Susceptible GSS 1.5	Susceptible GSS 1	Susceptible GSS 1.5		Susceptible GSS 1.5
xaa_323 187161_E35D_M36M_N37C_R41R_I62I_L63L_A71A_N83N_C95C	Susceptible	Susceptible	Susceptible	Susceptible	Susceptible			Susceptible		Susceptible	Susceptible	Susceptible	Susceptible		Susceptible		Susceptible	Susceptible	Susceptible	Susceptible	Susceptible	Susceptible		Susceptible	Susceptible		Susceptible		Susceptible		Susceptible	Susceptible	Susceptible	Susceptible		Susceptible	Susceptible GSS 1.5		Susceptible GSS 1.5		Susceptible GSS 1.5		Susceptible GSS 1.5	Susceptible GSS 1.5	Susceptible GSS 1	Susceptible GSS 1.5		Susceptible GSS 1.5
xaa_324 187161_E35D_M36M_N37C_R41R_I62I_L63L_A71A_N83N_C95R	Susceptible	Susceptible	Susceptible	Susceptible	Susceptible			Susceptible		Susceptible	Susceptible	Susceptible	Susceptible		Susceptible		Susceptible	Susceptible	Susceptible	Susceptible	Susceptible	Susceptible		Susceptible	Susceptible		Susceptible		Susceptible		Susceptible	Susceptible	Susceptible	Susceptible		Susceptible	Susceptible GSS 1.5		Susceptible GSS 1.5		Susceptible GSS 1.5		Susceptible GSS 1.5	Susceptible GSS 1.5	Susceptible GSS 1	Susceptible GSS 1.5		Susceptible GSS 1.5
xaa_325 187161_E35D_M36M_N37C_R41R_I62I_L63L_A71V_N83D_C95C	Susceptible	Susceptible	Susceptible	Susceptible	Susceptible			Susceptible		Susceptible	Susceptible	Susceptible	Susceptible		Susceptible		Susceptible	Susceptible	Susceptible	Susceptible	Susceptible	Susceptible		Susceptible	Susceptible		Potential Low-Level Resistance		Susceptible		Potential Low-Level Resistance	Susceptible	Low-Level Resistance	Potential Low-Level Resistance		Low-Level Resistance	Susceptible GSS 1.5		Susceptible GSS 1.5		Susceptible GSS 1.5		Susceptible GSS 1.5	Susceptible GSS 1.5	Susceptible GSS 1	Susceptible GSS 1.5		Susceptible GSS 1.5
xaa_326 187161_E35D_M36M_N37C_R41R_I62I_L63L_A71V_N83N_C95C	Susceptible	Susceptible	Susceptible	Susceptible	Susceptible			Susceptible		Susceptible	Susceptible	Susceptible	Susceptible		Susceptible		Susceptible	Susceptible	Susceptible	Susceptible	Susceptible	Susceptible		Susceptible	Susceptible		Susceptible		Susceptible		Susceptible	Susceptible	Susceptible	Susceptible		Susceptible	Susceptible GSS 1.5		Susceptible GSS 1.5		Susceptible GSS 1.5		Susceptible GSS 1.5	Susceptible GSS 1.5	Susceptible GSS 1	Susceptible GSS 1.5		Susceptible GSS 1.5
xaa_327 187161_E35D_M36M_N37C_R41R_I62I_L63L_A71V_N83N_C95R	Susceptible	Susceptible	Susceptible	Susceptible	Susceptible			Susceptible		Susceptible	Susceptible	Susceptible	Susceptible		Susceptible		Susceptible	Susceptible	Susceptible	Susceptible	Susceptible	Susceptible		Susceptible	Susceptible		Susceptible		Susceptible		Susceptible	Susceptible	Susceptible	Susceptible		Susceptible	Susceptible GSS 1.5		Susceptible GSS 1.5		Susceptible GSS 1.5		Susceptible GSS 1.5	Susceptible GSS 1.5	Susceptible GSS 1	Susceptible GSS 1.5		Susceptible GSS 1.5
xaa_328 187161_E35D_M36M_N37C_R41R_I62I_L63P_A71A_N83D_C95C	Susceptible	Susceptible	Susceptible	Susceptible	Susceptible			Susceptible		Susceptible	Susceptible	Susceptible	Susceptible		Susceptible		Susceptible	Susceptible	Susceptible	Susceptible	Susceptible	Susceptible		Susceptible	Susceptible		Potential Low-Level Resistance		Susceptible		Potential Low-Level Resistance	Susceptible	Low-Level Resistance	Potential Low-Level Resistance		Low-Level Resistance	Susceptible GSS 1.5		Susceptible GSS 1.5		Susceptible GSS 1.5		Susceptible GSS 1.5	Susceptible GSS 1.5	Susceptible GSS 1	Susceptible GSS 1.5		Susceptible GSS 1.5
xaa_329 187161_E35D_M36M_N37C_R41R_I62I_L63P_A71A_N83D_C95R	Susceptible	Susceptible	Susceptible	Susceptible	Susceptible			Susceptible		Susceptible	Susceptible	Susceptible	Susceptible		Susceptible		Susceptible	Susceptible	Susceptible	Susceptible	Susceptible	Susceptible		Susceptible	Susceptible		Potential Low-Level Resistance		Susceptible		Potential Low-Level Resistance	Susceptible	Low-Level Resistance	Potential Low-Level Resistance		Low-Level Resistance	Susceptible GSS 1.5		Susceptible GSS 1.5		Susceptible GSS 1.5		Susceptible GSS 1.5	Susceptible GSS 1.5	Susceptible GSS 1	Susceptible GSS 1.5		Susceptible GSS 1.5
xaa_330 187161_E35D_M36M_N37C_R41R_I62I_L63P_A71A_N83N_C95C	Susceptible	Susceptible	Susceptible	Susceptible	Susceptible			Susceptible		Susceptible	Susceptible	Susceptible	Susceptible		Susceptible		Susceptible	Susceptible	Susceptible	Susceptible	Susceptible	Susceptible		Susceptible	Susceptible		Susceptible		Susceptible		Susceptible	Susceptible	Susceptible	Susceptible		Susceptible	Susceptible GSS 1.5		Susceptible GSS 1.5		Susceptible GSS 1.5		Susceptible GSS 1.5	Susceptible GSS 1.5	Susceptible GSS 1	Susceptible GSS 1.5		Susceptible GSS 1.5
xaa_331 187161_E35D_M36M_N37C_R41R_I62I_L63P_A71A_N83N_C95R	Susceptible	Susceptible	Susceptible	Susceptible	Susceptible			Susceptible		Susceptible	Susceptible	Susceptible	Susceptible		Susceptible		Susceptible	Susceptible	Susceptible	Susceptible	Susceptible	Susceptible		Susceptible	Susceptible		Susceptible		Susceptible		Susceptible	Susceptible	Susceptible	Susceptible		Susceptible	Susceptible GSS 1.5		Susceptible GSS 1.5		Susceptible GSS 1.5		Susceptible GSS 1.5	Susceptible GSS 1.5	Susceptible GSS 1	Susceptible GSS 1.5		Susceptible GSS 1.5
xaa_332 187161_E35D_M36M_N37C_R41R_I62L_L63L_A71A_N83D_C95C	Susceptible	Susceptible	Susceptible	Susceptible	Susceptible			Susceptible		Susceptible	Susceptible	Susceptible	Susceptible		Susceptible		Susceptible	Susceptible	Susceptible	Susceptible	Susceptible	Susceptible		Susceptible	Susceptible		Potential Low-Level Resistance		Susceptible		Potential Low-Level Resistance	Susceptible	Low-Level Resistance	Potential Low-Level Resistance		Low-Level Resistance	Susceptible GSS 1.5		Susceptible GSS 1.5		Susceptible GSS 1.5		Susceptible GSS 1.5	Susceptible GSS 1.5	Susceptible GSS 1	Susceptible GSS 1.5		Susceptible GSS 1.5
xaa_333 187161_E35D_M36M_N37C_R41R_I62L_L63L_A71A_N83D_C95R	Susceptible	Susceptible	Susceptible	Susceptible	Susceptible			Susceptible		Susceptible	Susceptible	Susceptible	Susceptible		Susceptible		Susceptible	Susceptible	Susceptible	Susceptible	Susceptible	Susceptible		Susceptible	Susceptible		Potential Low-Level Resistance		Susceptible		Potential Low-Level Resistance	Susceptible	Low-Level Resistance	Potential Low-Level Resistance		Low-Level Resistance	Susceptible GSS 1.5		Susceptible GSS 1.5		Susceptible GSS 1.5		Susceptible GSS 1.5	Susceptible GSS 1.5	Susceptible GSS 1	Susceptible GSS 1.5		Susceptible GSS 1.5
xaa_334 187161_E35D_M36M_N37C_R41R_I62L_L63L_A71A_N83N_C95C	Susceptible	Susceptible	Susceptible	Susceptible	Susceptible			Susceptible		Susceptible	Susceptible	Susceptible	Susceptible		Susceptible		Susceptible	Susceptible	Susceptible	Susceptible	Susceptible	Susceptible		Susceptible	Susceptible		Susceptible		Susceptible		Susceptible	Susceptible	Susceptible	Susceptible		Susceptible	Susceptible GSS 1.5		Susceptible GSS 1.5		Susceptible GSS 1.5		Susceptible GSS 1.5	Susceptible GSS 1.5	Susceptible GSS 1	Susceptible GSS 1.5		Susceptible GSS 1.5
xaa_335 187161_E35D_M36M_N37C_R41R_I62L_L63L_A71A_N83N_C95R	Susceptible	Susceptible	Susceptible	Susceptible	Susceptible			Susceptible		Susceptible	Susceptible	Susceptible	Susceptible		Susceptible		Susceptible	Susceptible	Susceptible	Susceptible	Susceptible	Susceptible		Susceptible	Susceptible		Susceptible		Susceptible		Susceptible	Susceptible	Susceptible	Susceptible		Susceptible	Susceptible GSS 1.5		Susceptible GSS 1.5		Susceptible GSS 1.5		Susceptible GSS 1.5	Susceptible GSS 1.5	Susceptible GSS 1	Susceptible GSS 1.5		Susceptible GSS 1.5
xaa_336 187161_E35D_M36M_N37C_R41R_I62L_L63L_A71V_N83D_C95R	Susceptible	Susceptible	Susceptible	Susceptible	Susceptible			Susceptible		Susceptible	Susceptible	Susceptible	Susceptible		Susceptible		Susceptible	Susceptible	Susceptible	Susceptible	Susceptible	Susceptible		Susceptible	Susceptible		Potential Low-Level Resistance		Susceptible		Potential Low-Level Resistance	Susceptible	Low-Level Resistance	Potential Low-Level Resistance		Low-Level Resistance	Susceptible GSS 1.5		Susceptible GSS 1.5		Susceptible GSS 1.5		Susceptible GSS 1.5	Susceptible GSS 1.5	Susceptible GSS 1	Susceptible GSS 1.5		Susceptible GSS 1.5
xaa_337 187161_E35D_M36M_N37C_R41R_I62L_L63P_A71A_N83D_C95C	Susceptible	Susceptible	Susceptible	Susceptible	Susceptible			Susceptible		Susceptible	Susceptible	Susceptible	Susceptible		Susceptible		Susceptible	Susceptible	Susceptible	Susceptible	Susceptible	Susceptible		Susceptible	Susceptible		Potential Low-Level Resistance		Susceptible		Potential Low-Level Resistance	Susceptible	Low-Level Resistance	Potential Low-Level Resistance		Low-Level Resistance	Susceptible GSS 1.5		Susceptible GSS 1.5		Susceptible GSS 1.5		Susceptible GSS 1.5	Susceptible GSS 1.5	Susceptible GSS 1	Susceptible GSS 1.5		Susceptible GSS 1.5
xaa_338 187161_E35D_M36M_N37C_R41R_I62L_L63P_A71A_N83D_C95R	Susceptible	Susceptible	Susceptible	Susceptible	Susceptible			Susceptible		Susceptible	Susceptible	Susceptible	Susceptible		Susceptible		Susceptible	Susceptible	Susceptible	Susceptible	Susceptible	Susceptible		Susceptible	Susceptible		Potential Low-Level Resistance		Susceptible		Potential Low-Level Resistance	Susceptible	Low-Level Resistance	Potential Low-Level Resistance		Low-Level Resistance	Susceptible GSS 1.5		Susceptible GSS 1.5		Susceptible GSS 1.5		Susceptible GSS 1.5	Susceptible GSS 1.5	Susceptible GSS 1	Susceptible GSS 1.5		Susceptible GSS 1.5
xaa_339 187161_E35D_M36M_N37C_R41R_I62L_L63P_A71A_N83N_C95C	Susceptible	Susceptible	Susceptible	Susceptible	Susceptible			Susceptible		Susceptible	Susceptible	Susceptible	Susceptible		Susceptible		Susceptible	Susceptible	Susceptible	Susceptible	Susceptible	Susceptible		Susceptible	Susceptible		Susceptible		Susceptible		Susceptible	Susceptible	Susceptible	Susceptible		Susceptible	Susceptible GSS 1.5		Susceptible GSS 1.5		Susceptible GSS 1.5		Susceptible GSS 1.5	Susceptible GSS 1.5	Susceptible GSS 1	Susceptible GSS 1.5		Susceptible GSS 1.5
xaa_340 187161_E35D_M36M_N37C_R41R_I62L_L63P_A71A_N83N_C95R	Susceptible	Susceptible	Susceptible	Susceptible	Susceptible			Susceptible		Susceptible	Susceptible	Susceptible	Susceptible		Susceptible		Susceptible	Susceptible	Susceptible	Susceptible	Susceptible	Susceptible		Susceptible	Susceptible		Susceptible		Susceptible		Susceptible	Susceptible	Susceptible	Susceptible		Susceptible	Susceptible GSS 1.5		Susceptible GSS 1.5		Susceptible GSS 1.5		Susceptible GSS 1.5	Susceptible GSS 1.5	Susceptible GSS 1	Susceptible GSS 1.5		Susceptible GSS 1.5
xaa_341 187161_E35D_M36M_N37C_R41R_I62L_L63P_A71V_N83D_C95C	Susceptible	Susceptible	Susceptible	Susceptible	Susceptible			Susceptible		Susceptible	Susceptible	Susceptible	Susceptible		Susceptible		Susceptible	Susceptible	Susceptible	Susceptible	Susceptible	Susceptible		Susceptible	Susceptible		Potential Low-Level Resistance		Susceptible		Potential Low-Level Resistance	Susceptible	Low-Level Resistance	Potential Low-Level Resistance		Low-Level Resistance	Susceptible GSS 1.5		Susceptible GSS 1.5		Susceptible GSS 1.5		Susceptible GSS 1.5	Susceptible GSS 1.5	Susceptible GSS 1	Susceptible GSS 1.5		Susceptible GSS 1.5
xaa_342 187161_E35D_M36M_N37C_R41R_I62L_L63P_A71V_N83D_C95R	Susceptible	Susceptible	Susceptible	Susceptible	Susceptible			Susceptible		Susceptible	Susceptible	Susceptible	Susceptible		Susceptible		Susceptible	Susceptible	Susceptible	Susceptible	Susceptible	Susceptible		Susceptible	Susceptible		Potential Low-Level Resistance		Susceptible		Potential Low-Level Resistance	Susceptible	Low-Level Resistance	Potential Low-Level Resistance		Low-Level Resistance	Susceptible GSS 1.5		Susceptible GSS 1.5		Susceptible GSS 1.5		Susceptible GSS 1.5	Susceptible GSS 1.5	Susceptible GSS 1	Susceptible GSS 1.5		Susceptible GSS 1.5
xaa_343 187161_E35D_M36M_N37C_R41R_I62L_L63P_A71V_N83N_C95C	Susceptible	Susceptible	Susceptible	Susceptible	Susceptible			Susceptible		Susceptible	Susceptible	Susceptible	Susceptible		Susceptible		Susceptible	Susceptible	Susceptible	Susceptible	Susceptible	Susceptible		Susceptible	Susceptible		Susceptible		Susceptible		Susceptible	Susceptible	Susceptible	Susceptible		Susceptible	Susceptible GSS 1.5		Susceptible GSS 1.5		Susceptible GSS 1.5		Susceptible GSS 1.5	Susceptible GSS 1.5	Susceptible GSS 1	Susceptible GSS 1.5		Susceptible GSS 1.5
xaa_344 187161_E35D_M36M_N37C_R41R_I62L_L63P_A71V_N83N_C95R	Susceptible	Susceptible	Susceptible	Susceptible	Susceptible			Susceptible		Susceptible	Susceptible	Susceptible	Susceptible		Susceptible		Susceptible	Susceptible	Susceptible	Susceptible	Susceptible	Susceptible		Susceptible	Susceptible		Susceptible		Susceptible		Susceptible	Susceptible	Susceptible	Susceptible		Susceptible	Susceptible GSS 1.5		Susceptible GSS 1.5		Susceptible GSS 1.5		Susceptible GSS 1.5	Susceptible GSS 1.5	Susceptible GSS 1	Susceptible GSS 1.5		Susceptible GSS 1.5
xaa_345 187161_E35D_M36M_N37N_R41K_I62I_L63L_A71A_N83D_C95C	Susceptible	Susceptible	Susceptible	Susceptible	Susceptible			Susceptible		Susceptible	Susceptible	Susceptible	Susceptible		Susceptible		Susceptible	Susceptible	Susceptible	Susceptible	Susceptible	Susceptible		Susceptible	Susceptible		Potential Low-Level Resistance		Susceptible		Potential Low-Level Resistance	Susceptible	Low-Level Resistance	Potential Low-Level Resistance		Low-Level Resistance	Susceptible GSS 1.5		Susceptible GSS 1.5		Susceptible GSS 1.5		Susceptible GSS 1.5	Susceptible GSS 1.5	Susceptible GSS 1	Susceptible GSS 1.5		Susceptible GSS 1.5
xaa_346 187161_E35D_M36M_N37N_R41K_I62I_L63L_A71A_N83D_C95R	Susceptible	Susceptible	Susceptible	Susceptible	Susceptible			Susceptible		Susceptible	Susceptible	Susceptible	Susceptible		Susceptible		Susceptible	Susceptible	Susceptible	Susceptible	Susceptible	Susceptible		Susceptible	Susceptible		Potential Low-Level Resistance		Susceptible		Potential Low-Level Resistance	Susceptible	Low-Level Resistance	Potential Low-Level Resistance		Low-Level Resistance	Susceptible GSS 1.5		Susceptible GSS 1.5		Susceptible GSS 1.5		Susceptible GSS 1.5	Susceptible GSS 1.5	Susceptible GSS 1	Susceptible GSS 1.5		Susceptible GSS 1.5
xaa_347 187161_E35D_M36M_N37N_R41K_I62I_L63L_A71A_N83N_C95C	Susceptible	Susceptible	Susceptible	Susceptible	Susceptible			Susceptible		Susceptible	Susceptible	Susceptible	Susceptible		Susceptible		Susceptible	Susceptible	Susceptible	Susceptible	Susceptible	Susceptible		Susceptible	Susceptible		Susceptible		Susceptible		Susceptible	Susceptible	Susceptible	Susceptible		Susceptible	Susceptible GSS 1.5		Susceptible GSS 1.5		Susceptible GSS 1.5		Susceptible GSS 1.5	Susceptible GSS 1.5	Susceptible GSS 1	Susceptible GSS 1.5		Susceptible GSS 1.5
xaa_348 187161_E35D_M36M_N37N_R41K_I62I_L63L_A71A_N83N_C95R	Susceptible	Susceptible	Susceptible	Susceptible	Susceptible			Susceptible		Susceptible	Susceptible	Susceptible	Susceptible		Susceptible		Susceptible	Susceptible	Susceptible	Susceptible	Susceptible	Susceptible		Susceptible	Susceptible		Susceptible		Susceptible		Susceptible	Susceptible	Susceptible	Susceptible		Susceptible	Susceptible GSS 1.5		Susceptible GSS 1.5		Susceptible GSS 1.5		Susceptible GSS 1.5	Susceptible GSS 1.5	Susceptible GSS 1	Susceptible GSS 1.5		Susceptible GSS 1.5
xaa_349 187161_E35D_M36M_N37N_R41K_I62I_L63P_A71A_N83D_C95C	Susceptible	Susceptible	Susceptible	Susceptible	Susceptible			Susceptible		Susceptible	Susceptible	Susceptible	Susceptible		Susceptible		Susceptible	Susceptible	Susceptible	Susceptible	Susceptible	Susceptible		Susceptible	Susceptible		Potential Low-Level Resistance		Susceptible		Potential Low-Level Resistance	Susceptible	Low-Level Resistance	Potential Low-Level Resistance		Low-Level Resistance	Susceptible GSS 1.5		Susceptible GSS 1.5		Susceptible GSS 1.5		Susceptible GSS 1.5	Susceptible GSS 1.5	Susceptible GSS 1	Susceptible GSS 1.5		Susceptible GSS 1.5
xaa_350 187161_E35D_M36M_N37N_R41K_I62I_L63P_A71A_N83D_C95R	Susceptible	Susceptible	Susceptible	Susceptible	Susceptible			Susceptible		Susceptible	Susceptible	Susceptible	Susceptible		Susceptible		Susceptible	Susceptible	Susceptible	Susceptible	Susceptible	Susceptible		Susceptible	Susceptible		Potential Low-Level Resistance		Susceptible		Potential Low-Level Resistance	Susceptible	Low-Level Resistance	Potential Low-Level Resistance		Low-Level Resistance	Susceptible GSS 1.5		Susceptible GSS 1.5		Susceptible GSS 1.5		Susceptible GSS 1.5	Susceptible GSS 1.5	Susceptible GSS 1	Susceptible GSS 1.5		Susceptible GSS 1.5
xaa_351 187161_E35D_M36M_N37N_R41K_I62I_L63P_A71A_N83N_C95C	Susceptible	Susceptible	Susceptible	Susceptible	Susceptible			Susceptible		Susceptible	Susceptible	Susceptible	Susceptible		Susceptible		Susceptible	Susceptible	Susceptible	Susceptible	Susceptible	Susceptible		Susceptible	Susceptible		Susceptible		Susceptible		Susceptible	Susceptible	Susceptible	Susceptible		Susceptible	Susceptible GSS 1.5		Susceptible GSS 1.5		Susceptible GSS 1.5		Susceptible GSS 1.5	Susceptible GSS 1.5	Susceptible GSS 1	Susceptible GSS 1.5		Susceptible GSS 1.5
xaa_352 187161_E35D_M36M_N37N_R41K_I62I_L63P_A71A_N83N_C95R	Susceptible	Susceptible	Susceptible	Susceptible	Susceptible			Susceptible		Susceptible	Susceptible	Susceptible	Susceptible		Susceptible		Susceptible	Susceptible	Susceptible	Susceptible	Susceptible	Susceptible		Susceptible	Susceptible		Susceptible		Susceptible		Susceptible	Susceptible	Susceptible	Susceptible		Susceptible	Susceptible GSS 1.5		Susceptible GSS 1.5		Susceptible GSS 1.5		Susceptible GSS 1.5	Susceptible GSS 1.5	Susceptible GSS 1	Susceptible GSS 1.5		Susceptible GSS 1.5
xaa_353 187161_E35D_M36M_N37N_R41K_I62L_L63L_A71A_N83D_C95R	Susceptible	Susceptible	Susceptible	Susceptible	Susceptible			Susceptible		Susceptible	Susceptible	Susceptible	Susceptible		Susceptible		Susceptible	Susceptible	Susceptible	Susceptible	Susceptible	Susceptible		Susceptible	Susceptible		Potential Low-Level Resistance		Susceptible		Potential Low-Level Resistance	Susceptible	Low-Level Resistance	Potential Low-Level Resistance		Low-Level Resistance	Susceptible GSS 1.5		Susceptible GSS 1.5		Susceptible GSS 1.5		Susceptible GSS 1.5	Susceptible GSS 1.5	Susceptible GSS 1	Susceptible GSS 1.5		Susceptible GSS 1.5
xaa_354 187161_E35D_M36M_N37N_R41K_I62L_L63L_A71A_N83N_C95R	Susceptible	Susceptible	Susceptible	Susceptible	Susceptible			Susceptible		Susceptible	Susceptible	Susceptible	Susceptible		Susceptible		Susceptible	Susceptible	Susceptible	Susceptible	Susceptible	Susceptible		Susceptible	Susceptible		Susceptible		Susceptible		Susceptible	Susceptible	Susceptible	Susceptible		Susceptible	Susceptible GSS 1.5		Susceptible GSS 1.5		Susceptible GSS 1.5		Susceptible GSS 1.5	Susceptible GSS 1.5	Susceptible GSS 1	Susceptible GSS 1.5		Susceptible GSS 1.5
xaa_355 187161_E35D_M36M_N37N_R41K_I62L_L63P_A71A_N83N_C95R	Susceptible	Susceptible	Susceptible	Susceptible	Susceptible			Susceptible		Susceptible	Susceptible	Susceptible	Susceptible		Susceptible		Susceptible	Susceptible	Susceptible	Susceptible	Susceptible	Susceptible		Susceptible	Susceptible		Susceptible		Susceptible		Susceptible	Susceptible	Susceptible	Susceptible		Susceptible	Susceptible GSS 1.5		Susceptible GSS 1.5		Susceptible GSS 1.5		Susceptible GSS 1.5	Susceptible GSS 1.5	Susceptible GSS 1	Susceptible GSS 1.5		Susceptible GSS 1.5
xaa_356 187161_E35D_M36M_N37N_R41R_I62I_L63L_A71A_N83D_C95C	Susceptible	Susceptible	Susceptible	Susceptible	Susceptible			Susceptible		Susceptible	Susceptible	Susceptible	Susceptible		Susceptible		Susceptible	Susceptible	Susceptible	Susceptible	Susceptible	Susceptible		Susceptible	Susceptible		Potential Low-Level Resistance		Susceptible		Potential Low-Level Resistance	Susceptible	Low-Level Resistance	Potential Low-Level Resistance		Low-Level Resistance	Susceptible GSS 1.5		Susceptible GSS 1.5		Susceptible GSS 1.5		Susceptible GSS 1.5	Susceptible GSS 1.5	Susceptible GSS 1	Susceptible GSS 1.5		Susceptible GSS 1.5
xaa_357 187161_E35D_M36M_N37N_R41R_I62I_L63L_A71A_N83D_C95R	Susceptible	Susceptible	Susceptible	Susceptible	Susceptible			Susceptible		Susceptible	Susceptible	Susceptible	Susceptible		Susceptible		Susceptible	Susceptible	Susceptible	Susceptible	Susceptible	Susceptible		Susceptible	Susceptible		Potential Low-Level Resistance		Susceptible		Potential Low-Level Resistance	Susceptible	Low-Level Resistance	Potential Low-Level Resistance		Low-Level Resistance	Susceptible GSS 1.5		Susceptible GSS 1.5		Susceptible GSS 1.5		Susceptible GSS 1.5	Susceptible GSS 1.5	Susceptible GSS 1	Susceptible GSS 1.5		Susceptible GSS 1.5
xaa_358 187161_E35D_M36M_N37N_R41R_I62I_L63L_A71A_N83N_C95C	Susceptible	Susceptible	Susceptible	Susceptible	Susceptible			Susceptible		Susceptible	Susceptible	Susceptible	Susceptible		Susceptible		Susceptible	Susceptible	Susceptible	Susceptible	Susceptible	Susceptible		Susceptible	Susceptible		Susceptible		Susceptible		Susceptible	Susceptible	Susceptible	Susceptible		Susceptible	Susceptible GSS 1.5		Susceptible GSS 1.5		Susceptible GSS 1.5		Susceptible GSS 1.5	Susceptible GSS 1.5	Susceptible GSS 1	Susceptible GSS 1.5		Susceptible GSS 1.5
xaa_359 187161_E35D_M36M_N37N_R41R_I62I_L63L_A71A_N83N_C95R	Susceptible	Susceptible	Susceptible	Susceptible	Susceptible			Susceptible		Susceptible	Susceptible	Susceptible	Susceptible		Susceptible		Susceptible	Susceptible	Susceptible	Susceptible	Susceptible	Susceptible		Susceptible	Susceptible		Susceptible		Susceptible		Susceptible	Susceptible	Susceptible	Susceptible		Susceptible	Susceptible GSS 1.5		Susceptible GSS 1.5		Susceptible GSS 1.5		Susceptible GSS 1.5	Susceptible GSS 1.5	Susceptible GSS 1	Susceptible GSS 1.5		Susceptible GSS 1.5
xaa_360 187161_E35D_M36M_N37N_R41R_I62I_L63L_A71V_N83D_C95C	Susceptible	Susceptible	Susceptible	Susceptible	Susceptible			Susceptible		Susceptible	Susceptible	Susceptible	Susceptible		Susceptible		Susceptible	Susceptible	Susceptible	Susceptible	Susceptible	Susceptible		Susceptible	Susceptible		Potential Low-Level Resistance		Susceptible		Potential Low-Level Resistance	Susceptible	Low-Level Resistance	Potential Low-Level Resistance		Low-Level Resistance	Susceptible GSS 1.5		Susceptible GSS 1.5		Susceptible GSS 1.5		Susceptible GSS 1.5	Susceptible GSS 1.5	Susceptible GSS 1	Susceptible GSS 1.5		Susceptible GSS 1.5
xaa_361 187161_E35D_M36M_N37N_R41R_I62I_L63L_A71V_N83D_C95R	Susceptible	Susceptible	Susceptible	Susceptible	Susceptible			Susceptible		Susceptible	Susceptible	Susceptible	Susceptible		Susceptible		Susceptible	Susceptible	Susceptible	Susceptible	Susceptible	Susceptible		Susceptible	Susceptible		Potential Low-Level Resistance		Susceptible		Potential Low-Level Resistance	Susceptible	Low-Level Resistance	Potential Low-Level Resistance		Low-Level Resistance	Susceptible GSS 1.5		Susceptible GSS 1.5		Susceptible GSS 1.5		Susceptible GSS 1.5	Susceptible GSS 1.5	Susceptible GSS 1	Susceptible GSS 1.5		Susceptible GSS 1.5
xaa_362 187161_E35D_M36M_N37N_R41R_I62I_L63L_A71V_N83N_C95C	Susceptible	Susceptible	Susceptible	Susceptible	Susceptible			Susceptible		Susceptible	Susceptible	Susceptible	Susceptible		Susceptible		Susceptible	Susceptible	Susceptible	Susceptible	Susceptible	Susceptible		Susceptible	Susceptible		Susceptible		Susceptible		Susceptible	Susceptible	Susceptible	Susceptible		Susceptible	Susceptible GSS 1.5		Susceptible GSS 1.5		Susceptible GSS 1.5		Susceptible GSS 1.5	Susceptible GSS 1.5	Susceptible GSS 1	Susceptible GSS 1.5		Susceptible GSS 1.5
xaa_363 187161_E35D_M36M_N37N_R41R_I62I_L63L_A71V_N83N_C95R	Susceptible	Susceptible	Susceptible	Susceptible	Susceptible			Susceptible		Susceptible	Susceptible	Susceptible	Susceptible		Susceptible		Susceptible	Susceptible	Susceptible	Susceptible	Susceptible	Susceptible		Susceptible	Susceptible		Susceptible		Susceptible		Susceptible	Susceptible	Susceptible	Susceptible		Susceptible	Susceptible GSS 1.5		Susceptible GSS 1.5		Susceptible GSS 1.5		Susceptible GSS 1.5	Susceptible GSS 1.5	Susceptible GSS 1	Susceptible GSS 1.5		Susceptible GSS 1.5
xaa_364 187161_E35D_M36M_N37N_R41R_I62I_L63P_A71A_N83D_C95C	Susceptible	Susceptible	Susceptible	Susceptible	Susceptible			Susceptible		Susceptible	Susceptible	Susceptible	Susceptible		Susceptible		Susceptible	Susceptible	Susceptible	Susceptible	Susceptible	Susceptible		Susceptible	Susceptible		Potential Low-Level Resistance		Susceptible		Potential Low-Level Resistance	Susceptible	Low-Level Resistance	Potential Low-Level Resistance		Low-Level Resistance	Susceptible GSS 1.5		Susceptible GSS 1.5		Susceptible GSS 1.5		Susceptible GSS 1.5	Susceptible GSS 1.5	Susceptible GSS 1	Susceptible GSS 1.5		Susceptible GSS 1.5
xaa_365 187161_E35D_M36M_N37N_R41R_I62I_L63P_A71A_N83D_C95R	Susceptible	Susceptible	Susceptible	Susceptible	Susceptible			Susceptible		Susceptible	Susceptible	Susceptible	Susceptible		Susceptible		Susceptible	Susceptible	Susceptible	Susceptible	Susceptible	Susceptible		Susceptible	Susceptible		Potential Low-Level Resistance		Susceptible		Potential Low-Level Resistance	Susceptible	Low-Level Resistance	Potential Low-Level Resistance		Low-Level Resistance	Susceptible GSS 1.5		Susceptible GSS 1.5		Susceptible GSS 1.5		Susceptible GSS 1.5	Susceptible GSS 1.5	Susceptible GSS 1	Susceptible GSS 1.5		Susceptible GSS 1.5
xaa_366 187161_E35D_M36M_N37N_R41R_I62I_L63P_A71A_N83N_C95C	Susceptible	Susceptible	Susceptible	Susceptible	Susceptible			Susceptible		Susceptible	Susceptible	Susceptible	Susceptible		Susceptible		Susceptible	Susceptible	Susceptible	Susceptible	Susceptible	Susceptible		Susceptible	Susceptible		Susceptible		Susceptible		Susceptible	Susceptible	Susceptible	Susceptible		Susceptible	Susceptible GSS 1.5		Susceptible GSS 1.5		Susceptible GSS 1.5		Susceptible GSS 1.5	Susceptible GSS 1.5	Susceptible GSS 1	Susceptible GSS 1.5		Susceptible GSS 1.5
xaa_367 187161_E35D_M36M_N37N_R41R_I62I_L63P_A71A_N83N_C95R	Susceptible	Susceptible	Susceptible	Susceptible	Susceptible			Susceptible		Susceptible	Susceptible	Susceptible	Susceptible		Susceptible		Susceptible	Susceptible	Susceptible	Susceptible	Susceptible	Susceptible		Susceptible	Susceptible		Susceptible		Susceptible		Susceptible	Susceptible	Susceptible	Susceptible		Susceptible	Susceptible GSS 1.5		Susceptible GSS 1.5		Susceptible GSS 1.5		Susceptible GSS 1.5	Susceptible GSS 1.5	Susceptible GSS 1	Susceptible GSS 1.5		Susceptible GSS 1.5
xaa_368 187161_E35D_M36M_N37N_R41R_I62I_L63P_A71V_N83D_C95C	Susceptible	Susceptible	Susceptible	Susceptible	Susceptible			Susceptible		Susceptible	Susceptible	Susceptible	Susceptible		Susceptible		Susceptible	Susceptible	Susceptible	Susceptible	Susceptible	Susceptible		Susceptible	Susceptible		Potential Low-Level Resistance		Susceptible		Potential Low-Level Resistance	Susceptible	Low-Level Resistance	Potential Low-Level Resistance		Low-Level Resistance	Susceptible GSS 1.5		Susceptible GSS 1.5		Susceptible GSS 1.5		Susceptible GSS 1.5	Susceptible GSS 1.5	Susceptible GSS 1	Susceptible GSS 1.5		Susceptible GSS 1.5
xaa_369 187161_E35D_M36M_N37N_R41R_I62I_L63P_A71V_N83D_C95R	Susceptible	Susceptible	Susceptible	Susceptible	Susceptible			Susceptible		Susceptible	Susceptible	Susceptible	Susceptible		Susceptible		Susceptible	Susceptible	Susceptible	Susceptible	Susceptible	Susceptible		Susceptible	Susceptible		Potential Low-Level Resistance		Susceptible		Potential Low-Level Resistance	Susceptible	Low-Level Resistance	Potential Low-Level Resistance		Low-Level Resistance	Susceptible GSS 1.5		Susceptible GSS 1.5		Susceptible GSS 1.5		Susceptible GSS 1.5	Susceptible GSS 1.5	Susceptible GSS 1	Susceptible GSS 1.5		Susceptible GSS 1.5
xaa_370 187161_E35D_M36M_N37N_R41R_I62I_L63P_A71V_N83N_C95R	Susceptible	Susceptible	Susceptible	Susceptible	Susceptible			Susceptible		Susceptible	Susceptible	Susceptible	Susceptible		Susceptible		Susceptible	Susceptible	Susceptible	Susceptible	Susceptible	Susceptible		Susceptible	Susceptible		Susceptible		Susceptible		Susceptible	Susceptible	Susceptible	Susceptible		Susceptible	Susceptible GSS 1.5		Susceptible GSS 1.5		Susceptible GSS 1.5		Susceptible GSS 1.5	Susceptible GSS 1.5	Susceptible GSS 1	Susceptible GSS 1.5		Susceptible GSS 1.5
xaa_371 187161_E35D_M36M_N37N_R41R_I62L_L63L_A71A_N83D_C95C	Susceptible	Susceptible	Susceptible	Susceptible	Susceptible			Susceptible		Susceptible	Susceptible	Susceptible	Susceptible		Susceptible		Susceptible	Susceptible	Susceptible	Susceptible	Susceptible	Susceptible		Susceptible	Susceptible		Potential Low-Level Resistance		Susceptible		Potential Low-Level Resistance	Susceptible	Low-Level Resistance	Potential Low-Level Resistance		Low-Level Resistance	Susceptible GSS 1.5		Susceptible GSS 1.5		Susceptible GSS 1.5		Susceptible GSS 1.5	Susceptible GSS 1.5	Susceptible GSS 1	Susceptible GSS 1.5		Susceptible GSS 1.5
xaa_372 187161_E35D_M36M_N37N_R41R_I62L_L63L_A71A_N83D_C95R	Susceptible	Susceptible	Susceptible	Susceptible	Susceptible			Susceptible		Susceptible	Susceptible	Susceptible	Susceptible		Susceptible		Susceptible	Susceptible	Susceptible	Susceptible	Susceptible	Susceptible		Susceptible	Susceptible		Potential Low-Level Resistance		Susceptible		Potential Low-Level Resistance	Susceptible	Low-Level Resistance	Potential Low-Level Resistance		Low-Level Resistance	Susceptible GSS 1.5		Susceptible GSS 1.5		Susceptible GSS 1.5		Susceptible GSS 1.5	Susceptible GSS 1.5	Susceptible GSS 1	Susceptible GSS 1.5		Susceptible GSS 1.5
xaa_373 187161_E35D_M36M_N37N_R41R_I62L_L63L_A71A_N83N_C95C	Susceptible	Susceptible	Susceptible	Susceptible	Susceptible			Susceptible		Susceptible	Susceptible	Susceptible	Susceptible		Susceptible		Susceptible	Susceptible	Susceptible	Susceptible	Susceptible	Susceptible		Susceptible	Susceptible		Susceptible		Susceptible		Susceptible	Susceptible	Susceptible	Susceptible		Susceptible	Susceptible GSS 1.5		Susceptible GSS 1.5		Susceptible GSS 1.5		Susceptible GSS 1.5	Susceptible GSS 1.5	Susceptible GSS 1	Susceptible GSS 1.5		Susceptible GSS 1.5
xaa_374 187161_E35D_M36M_N37N_R41R_I62L_L63L_A71A_N83N_C95R	Susceptible	Susceptible	Susceptible	Susceptible	Susceptible			Susceptible		Susceptible	Susceptible	Susceptible	Susceptible		Susceptible		Susceptible	Susceptible	Susceptible	Susceptible	Susceptible	Susceptible		Susceptible	Susceptible		Susceptible		Susceptible		Susceptible	Susceptible	Susceptible	Susceptible		Susceptible	Susceptible GSS 1.5		Susceptible GSS 1.5		Susceptible GSS 1.5		Susceptible GSS 1.5	Susceptible GSS 1.5	Susceptible GSS 1	Susceptible GSS 1.5		Susceptible GSS 1.5
xaa_375 187161_E35D_M36M_N37N_R41R_I62L_L63L_A71V_N83D_C95R	Susceptible	Susceptible	Susceptible	Susceptible	Susceptible			Susceptible		Susceptible	Susceptible	Susceptible	Susceptible		Susceptible		Susceptible	Susceptible	Susceptible	Susceptible	Susceptible	Susceptible		Susceptible	Susceptible		Potential Low-Level Resistance		Susceptible		Potential Low-Level Resistance	Susceptible	Low-Level Resistance	Potential Low-Level Resistance		Low-Level Resistance	Susceptible GSS 1.5		Susceptible GSS 1.5		Susceptible GSS 1.5		Susceptible GSS 1.5	Susceptible GSS 1.5	Susceptible GSS 1	Susceptible GSS 1.5		Susceptible GSS 1.5
xaa_376 187161_E35D_M36M_N37N_R41R_I62L_L63P_A71A_N83D_C95C	Susceptible	Susceptible	Susceptible	Susceptible	Susceptible			Susceptible		Susceptible	Susceptible	Susceptible	Susceptible		Susceptible		Susceptible	Susceptible	Susceptible	Susceptible	Susceptible	Susceptible		Susceptible	Susceptible		Potential Low-Level Resistance		Susceptible		Potential Low-Level Resistance	Susceptible	Low-Level Resistance	Potential Low-Level Resistance		Low-Level Resistance	Susceptible GSS 1.5		Susceptible GSS 1.5		Susceptible GSS 1.5		Susceptible GSS 1.5	Susceptible GSS 1.5	Susceptible GSS 1	Susceptible GSS 1.5		Susceptible GSS 1.5
xaa_377 187161_E35D_M36M_N37N_R41R_I62L_L63P_A71A_N83D_C95R	Susceptible	Susceptible	Susceptible	Susceptible	Susceptible			Susceptible		Susceptible	Susceptible	Susceptible	Susceptible		Susceptible		Susceptible	Susceptible	Susceptible	Susceptible	Susceptible	Susceptible		Susceptible	Susceptible		Potential Low-Level Resistance		Susceptible		Potential Low-Level Resistance	Susceptible	Low-Level Resistance	Potential Low-Level Resistance		Low-Level Resistance	Susceptible GSS 1.5		Susceptible GSS 1.5		Susceptible GSS 1.5		Susceptible GSS 1.5	Susceptible GSS 1.5	Susceptible GSS 1	Susceptible GSS 1.5		Susceptible GSS 1.5
xaa_378 187161_E35D_M36M_N37N_R41R_I62L_L63P_A71A_N83N_C95C	Susceptible	Susceptible	Susceptible	Susceptible	Susceptible			Susceptible		Susceptible	Susceptible	Susceptible	Susceptible		Susceptible		Susceptible	Susceptible	Susceptible	Susceptible	Susceptible	Susceptible		Susceptible	Susceptible		Susceptible		Susceptible		Susceptible	Susceptible	Susceptible	Susceptible		Susceptible	Susceptible GSS 1.5		Susceptible GSS 1.5		Susceptible GSS 1.5		Susceptible GSS 1.5	Susceptible GSS 1.5	Susceptible GSS 1	Susceptible GSS 1.5		Susceptible GSS 1.5
xaa_379 187161_E35D_M36M_N37N_R41R_I62L_L63P_A71A_N83N_C95R	Susceptible	Susceptible	Susceptible	Susceptible	Susceptible			Susceptible		Susceptible	Susceptible	Susceptible	Susceptible		Susceptible		Susceptible	Susceptible	Susceptible	Susceptible	Susceptible	Susceptible		Susceptible	Susceptible		Susceptible		Susceptible		Susceptible	Susceptible	Susceptible	Susceptible		Susceptible	Susceptible GSS 1.5		Susceptible GSS 1.5		Susceptible GSS 1.5		Susceptible GSS 1.5	Susceptible GSS 1.5	Susceptible GSS 1	Susceptible GSS 1.5		Susceptible GSS 1.5
xaa_380 187161_E35D_M36M_N37N_R41R_I62L_L63P_A71V_N83D_C95C	Susceptible	Susceptible	Susceptible	Susceptible	Susceptible			Susceptible		Susceptible	Susceptible	Susceptible	Susceptible		Susceptible		Susceptible	Susceptible	Susceptible	Susceptible	Susceptible	Susceptible		Susceptible	Susceptible		Potential Low-Level Resistance		Susceptible		Potential Low-Level Resistance	Susceptible	Low-Level Resistance	Potential Low-Level Resistance		Low-Level Resistance	Susceptible GSS 1.5		Susceptible GSS 1.5		Susceptible GSS 1.5		Susceptible GSS 1.5	Susceptible GSS 1.5	Susceptible GSS 1	Susceptible GSS 1.5		Susceptible GSS 1.5
xaa_381 187161_E35D_M36M_N37N_R41R_I62L_L63P_A71V_N83D_C95R	Susceptible	Susceptible	Susceptible	Susceptible	Susceptible			Susceptible		Susceptible	Susceptible	Susceptible	Susceptible		Susceptible		Susceptible	Susceptible	Susceptible	Susceptible	Susceptible	Susceptible		Susceptible	Susceptible		Potential Low-Level Resistance		Susceptible		Potential Low-Level Resistance	Susceptible	Low-Level Resistance	Potential Low-Level Resistance		Low-Level Resistance	Susceptible GSS 1.5		Susceptible GSS 1.5		Susceptible GSS 1.5		Susceptible GSS 1.5	Susceptible GSS 1.5	Susceptible GSS 1	Susceptible GSS 1.5		Susceptible GSS 1.5
xaa_382 187161_E35D_M36M_N37N_R41R_I62L_L63P_A71V_N83N_C95C	Susceptible	Susceptible	Susceptible	Susceptible	Susceptible			Susceptible		Susceptible	Susceptible	Susceptible	Susceptible		Susceptible		Susceptible	Susceptible	Susceptible	Susceptible	Susceptible	Susceptible		Susceptible	Susceptible		Susceptible		Susceptible		Susceptible	Susceptible	Susceptible	Susceptible		Susceptible	Susceptible GSS 1.5		Susceptible GSS 1.5		Susceptible GSS 1.5		Susceptible GSS 1.5	Susceptible GSS 1.5	Susceptible GSS 1	Susceptible GSS 1.5		Susceptible GSS 1.5
xaa_383 187161_E35D_M36M_N37N_R41R_I62L_L63P_A71V_N83N_C95R	Susceptible	Susceptible	Susceptible	Susceptible	Susceptible			Susceptible		Susceptible	Susceptible	Susceptible	Susceptible		Susceptible		Susceptible	Susceptible	Susceptible	Susceptible	Susceptible	Susceptible		Susceptible	Susceptible		Susceptible		Susceptible		Susceptible	Susceptible	Susceptible	Susceptible		Susceptible	Susceptible GSS 1.5		Susceptible GSS 1.5		Susceptible GSS 1.5		Susceptible GSS 1.5	Susceptible GSS 1.5	Susceptible GSS 1	Susceptible GSS 1.5		Susceptible GSS 1.5
xaa_384 187161_E35D_M36M_N37S_R41K_I62I_L63L_A71A_N83D_C95R	Susceptible	Susceptible	Susceptible	Susceptible	Susceptible			Susceptible		Susceptible	Susceptible	Susceptible	Susceptible		Susceptible		Susceptible	Susceptible	Susceptible	Susceptible	Susceptible	Susceptible		Susceptible	Susceptible		Potential Low-Level Resistance		Susceptible		Potential Low-Level Resistance	Susceptible	Low-Level Resistance	Potential Low-Level Resistance		Low-Level Resistance	Susceptible GSS 1.5		Susceptible GSS 1.5		Susceptible GSS 1.5		Susceptible GSS 1.5	Susceptible GSS 1.5	Susceptible GSS 1	Susceptible GSS 1.5		Susceptible GSS 1.5
xaa_385 187161_E35D_M36M_N37S_R41K_I62I_L63L_A71A_N83N_C95R	Susceptible	Susceptible	Susceptible	Susceptible	Susceptible			Susceptible		Susceptible	Susceptible	Susceptible	Susceptible		Susceptible		Susceptible	Susceptible	Susceptible	Susceptible	Susceptible	Susceptible		Susceptible	Susceptible		Susceptible		Susceptible		Susceptible	Susceptible	Susceptible	Susceptible		Susceptible	Susceptible GSS 1.5		Susceptible GSS 1.5		Susceptible GSS 1.5		Susceptible GSS 1.5	Susceptible GSS 1.5	Susceptible GSS 1	Susceptible GSS 1.5		Susceptible GSS 1.5
xaa_386 187161_E35D_M36M_N37S_R41K_I62L_L63L_A71A_N83D_C95R	Susceptible	Susceptible	Susceptible	Susceptible	Susceptible			Susceptible		Susceptible	Susceptible	Susceptible	Susceptible		Susceptible		Susceptible	Susceptible	Susceptible	Susceptible	Susceptible	Susceptible		Susceptible	Susceptible		Potential Low-Level Resistance		Susceptible		Potential Low-Level Resistance	Susceptible	Low-Level Resistance	Potential Low-Level Resistance		Low-Level Resistance	Susceptible GSS 1.5		Susceptible GSS 1.5		Susceptible GSS 1.5		Susceptible GSS 1.5	Susceptible GSS 1.5	Susceptible GSS 1	Susceptible GSS 1.5		Susceptible GSS 1.5
xaa_387 187161_E35D_M36M_N37S_R41R_I62I_L63L_A71A_N83D_C95C	Susceptible	Susceptible	Susceptible	Susceptible	Susceptible			Susceptible		Susceptible	Susceptible	Susceptible	Susceptible		Susceptible		Susceptible	Susceptible	Susceptible	Susceptible	Susceptible	Susceptible		Susceptible	Susceptible		Potential Low-Level Resistance		Susceptible		Potential Low-Level Resistance	Susceptible	Low-Level Resistance	Potential Low-Level Resistance		Low-Level Resistance	Susceptible GSS 1.5		Susceptible GSS 1.5		Susceptible GSS 1.5		Susceptible GSS 1.5	Susceptible GSS 1.5	Susceptible GSS 1	Susceptible GSS 1.5		Susceptible GSS 1.5
xaa_388 187161_E35D_M36M_N37S_R41R_I62I_L63L_A71A_N83D_C95R	Susceptible	Susceptible	Susceptible	Susceptible	Susceptible			Susceptible		Susceptible	Susceptible	Susceptible	Susceptible		Susceptible		Susceptible	Susceptible	Susceptible	Susceptible	Susceptible	Susceptible		Susceptible	Susceptible		Potential Low-Level Resistance		Susceptible		Potential Low-Level Resistance	Susceptible	Low-Level Resistance	Potential Low-Level Resistance		Low-Level Resistance	Susceptible GSS 1.5		Susceptible GSS 1.5		Susceptible GSS 1.5		Susceptible GSS 1.5	Susceptible GSS 1.5	Susceptible GSS 1	Susceptible GSS 1.5		Susceptible GSS 1.5
xaa_389 187161_E35D_M36M_N37S_R41R_I62I_L63L_A71A_N83N_C95C	Susceptible	Susceptible	Susceptible	Susceptible	Susceptible			Susceptible		Susceptible	Susceptible	Susceptible	Susceptible		Susceptible		Susceptible	Susceptible	Susceptible	Susceptible	Susceptible	Susceptible		Susceptible	Susceptible		Susceptible		Susceptible		Susceptible	Susceptible	Susceptible	Susceptible		Susceptible	Susceptible GSS 1.5		Susceptible GSS 1.5		Susceptible GSS 1.5		Susceptible GSS 1.5	Susceptible GSS 1.5	Susceptible GSS 1	Susceptible GSS 1.5		Susceptible GSS 1.5
xaa_390 187161_E35D_M36M_N37S_R41R_I62I_L63L_A71A_N83N_C95R	Susceptible	Susceptible	Susceptible	Susceptible	Susceptible			Susceptible		Susceptible	Susceptible	Susceptible	Susceptible		Susceptible		Susceptible	Susceptible	Susceptible	Susceptible	Susceptible	Susceptible		Susceptible	Susceptible		Susceptible		Susceptible		Susceptible	Susceptible	Susceptible	Susceptible		Susceptible	Susceptible GSS 1.5		Susceptible GSS 1.5		Susceptible GSS 1.5		Susceptible GSS 1.5	Susceptible GSS 1.5	Susceptible GSS 1	Susceptible GSS 1.5		Susceptible GSS 1.5
xaa_391 187161_E35D_M36M_N37S_R41R_I62I_L63L_A71V_N83D_C95C	Susceptible	Susceptible	Susceptible	Susceptible	Susceptible			Susceptible		Susceptible	Susceptible	Susceptible	Susceptible		Susceptible		Susceptible	Susceptible	Susceptible	Susceptible	Susceptible	Susceptible		Susceptible	Susceptible		Potential Low-Level Resistance		Susceptible		Potential Low-Level Resistance	Susceptible	Low-Level Resistance	Potential Low-Level Resistance		Low-Level Resistance	Susceptible GSS 1.5		Susceptible GSS 1.5		Susceptible GSS 1.5		Susceptible GSS 1.5	Susceptible GSS 1.5	Susceptible GSS 1	Susceptible GSS 1.5		Susceptible GSS 1.5
xaa_392 187161_E35D_M36M_N37S_R41R_I62I_L63P_A71A_N83D_C95C	Susceptible	Susceptible	Susceptible	Susceptible	Susceptible			Susceptible		Susceptible	Susceptible	Susceptible	Susceptible		Susceptible		Susceptible	Susceptible	Susceptible	Susceptible	Susceptible	Susceptible		Susceptible	Susceptible		Potential Low-Level Resistance		Susceptible		Potential Low-Level Resistance	Susceptible	Low-Level Resistance	Potential Low-Level Resistance		Low-Level Resistance	Susceptible GSS 1.5		Susceptible GSS 1.5		Susceptible GSS 1.5		Susceptible GSS 1.5	Susceptible GSS 1.5	Susceptible GSS 1	Susceptible GSS 1.5		Susceptible GSS 1.5
xaa_393 187161_E35D_M36M_N37S_R41R_I62I_L63P_A71A_N83D_C95R	Susceptible	Susceptible	Susceptible	Susceptible	Susceptible			Susceptible		Susceptible	Susceptible	Susceptible	Susceptible		Susceptible		Susceptible	Susceptible	Susceptible	Susceptible	Susceptible	Susceptible		Susceptible	Susceptible		Potential Low-Level Resistance		Susceptible		Potential Low-Level Resistance	Susceptible	Low-Level Resistance	Potential Low-Level Resistance		Low-Level Resistance	Susceptible GSS 1.5		Susceptible GSS 1.5		Susceptible GSS 1.5		Susceptible GSS 1.5	Susceptible GSS 1.5	Susceptible GSS 1	Susceptible GSS 1.5		Susceptible GSS 1.5
xaa_394 187161_E35D_M36M_N37S_R41R_I62I_L63P_A71A_N83N_C95C	Susceptible	Susceptible	Susceptible	Susceptible	Susceptible			Susceptible		Susceptible	Susceptible	Susceptible	Susceptible		Susceptible		Susceptible	Susceptible	Susceptible	Susceptible	Susceptible	Susceptible		Susceptible	Susceptible		Susceptible		Susceptible		Susceptible	Susceptible	Susceptible	Susceptible		Susceptible	Susceptible GSS 1.5		Susceptible GSS 1.5		Susceptible GSS 1.5		Susceptible GSS 1.5	Susceptible GSS 1.5	Susceptible GSS 1	Susceptible GSS 1.5		Susceptible GSS 1.5
xaa_395 187161_E35D_M36M_N37S_R41R_I62I_L63P_A71A_N83N_C95R	Susceptible	Susceptible	Susceptible	Susceptible	Susceptible			Susceptible		Susceptible	Susceptible	Susceptible	Susceptible		Susceptible		Susceptible	Susceptible	Susceptible	Susceptible	Susceptible	Susceptible		Susceptible	Susceptible		Susceptible		Susceptible		Susceptible	Susceptible	Susceptible	Susceptible		Susceptible	Susceptible GSS 1.5		Susceptible GSS 1.5		Susceptible GSS 1.5		Susceptible GSS 1.5	Susceptible GSS 1.5	Susceptible GSS 1	Susceptible GSS 1.5		Susceptible GSS 1.5
xaa_396 187161_E35D_M36M_N37S_R41R_I62L_L63L_A71A_N83D_C95C	Susceptible	Susceptible	Susceptible	Susceptible	Susceptible			Susceptible		Susceptible	Susceptible	Susceptible	Susceptible		Susceptible		Susceptible	Susceptible	Susceptible	Susceptible	Susceptible	Susceptible		Susceptible	Susceptible		Potential Low-Level Resistance		Susceptible		Potential Low-Level Resistance	Susceptible	Low-Level Resistance	Potential Low-Level Resistance		Low-Level Resistance	Susceptible GSS 1.5		Susceptible GSS 1.5		Susceptible GSS 1.5		Susceptible GSS 1.5	Susceptible GSS 1.5	Susceptible GSS 1	Susceptible GSS 1.5		Susceptible GSS 1.5
xaa_397 187161_E35D_M36M_N37S_R41R_I62L_L63L_A71A_N83D_C95R	Susceptible	Susceptible	Susceptible	Susceptible	Susceptible			Susceptible		Susceptible	Susceptible	Susceptible	Susceptible		Susceptible		Susceptible	Susceptible	Susceptible	Susceptible	Susceptible	Susceptible		Susceptible	Susceptible		Potential Low-Level Resistance		Susceptible		Potential Low-Level Resistance	Susceptible	Low-Level Resistance	Potential Low-Level Resistance		Low-Level Resistance	Susceptible GSS 1.5		Susceptible GSS 1.5		Susceptible GSS 1.5		Susceptible GSS 1.5	Susceptible GSS 1.5	Susceptible GSS 1	Susceptible GSS 1.5		Susceptible GSS 1.5
xaa_398 187161_E35D_M36M_N37S_R41R_I62L_L63L_A71A_N83N_C95C	Susceptible	Susceptible	Susceptible	Susceptible	Susceptible			Susceptible		Susceptible	Susceptible	Susceptible	Susceptible		Susceptible		Susceptible	Susceptible	Susceptible	Susceptible	Susceptible	Susceptible		Susceptible	Susceptible		Susceptible		Susceptible		Susceptible	Susceptible	Susceptible	Susceptible		Susceptible	Susceptible GSS 1.5		Susceptible GSS 1.5		Susceptible GSS 1.5		Susceptible GSS 1.5	Susceptible GSS 1.5	Susceptible GSS 1	Susceptible GSS 1.5		Susceptible GSS 1.5
xaa_399 187161_E35D_M36M_N37S_R41R_I62L_L63L_A71A_N83N_C95R	Susceptible	Susceptible	Susceptible	Susceptible	Susceptible			Susceptible		Susceptible	Susceptible	Susceptible	Susceptible		Susceptible		Susceptible	Susceptible	Susceptible	Susceptible	Susceptible	Susceptible		Susceptible	Susceptible		Susceptible		Susceptible		Susceptible	Susceptible	Susceptible	Susceptible		Susceptible	Susceptible GSS 1.5		Susceptible GSS 1.5		Susceptible GSS 1.5		Susceptible GSS 1.5	Susceptible GSS 1.5	Susceptible GSS 1	Susceptible GSS 1.5		Susceptible GSS 1.5
xaa_400 187161_E35D_M36M_N37S_R41R_I62L_L63P_A71A_N83D_C95C	Susceptible	Susceptible	Susceptible	Susceptible	Susceptible			Susceptible		Susceptible	Susceptible	Susceptible	Susceptible		Susceptible		Susceptible	Susceptible	Susceptible	Susceptible	Susceptible	Susceptible		Susceptible	Susceptible		Potential Low-Level Resistance		Susceptible		Potential Low-Level Resistance	Susceptible	Low-Level Resistance	Potential Low-Level Resistance		Low-Level Resistance	Susceptible GSS 1.5		Susceptible GSS 1.5		Susceptible GSS 1.5		Susceptible GSS 1.5	Susceptible GSS 1.5	Susceptible GSS 1	Susceptible GSS 1.5		Susceptible GSS 1.5
xaa_401 187161_E35D_M36M_N37S_R41R_I62L_L63P_A71A_N83D_C95R	Susceptible	Susceptible	Susceptible	Susceptible	Susceptible			Susceptible		Susceptible	Susceptible	Susceptible	Susceptible		Susceptible		Susceptible	Susceptible	Susceptible	Susceptible	Susceptible	Susceptible		Susceptible	Susceptible		Potential Low-Level Resistance		Susceptible		Potential Low-Level Resistance	Susceptible	Low-Level Resistance	Potential Low-Level Resistance		Low-Level Resistance	Susceptible GSS 1.5		Susceptible GSS 1.5		Susceptible GSS 1.5		Susceptible GSS 1.5	Susceptible GSS 1.5	Susceptible GSS 1	Susceptible GSS 1.5		Susceptible GSS 1.5
xaa_402 187161_E35D_M36M_N37S_R41R_I62L_L63P_A71A_N83N_C95C	Susceptible	Susceptible	Susceptible	Susceptible	Susceptible			Susceptible		Susceptible	Susceptible	Susceptible	Susceptible		Susceptible		Susceptible	Susceptible	Susceptible	Susceptible	Susceptible	Susceptible		Susceptible	Susceptible		Susceptible		Susceptible		Susceptible	Susceptible	Susceptible	Susceptible		Susceptible	Susceptible GSS 1.5		Susceptible GSS 1.5		Susceptible GSS 1.5		Susceptible GSS 1.5	Susceptible GSS 1.5	Susceptible GSS 1	Susceptible GSS 1.5		Susceptible GSS 1.5
xaa_403 187161_E35D_M36M_N37S_R41R_I62L_L63P_A71A_N83N_C95R	Susceptible	Susceptible	Susceptible	Susceptible	Susceptible			Susceptible		Susceptible	Susceptible	Susceptible	Susceptible		Susceptible		Susceptible	Susceptible	Susceptible	Susceptible	Susceptible	Susceptible		Susceptible	Susceptible		Susceptible		Susceptible		Susceptible	Susceptible	Susceptible	Susceptible		Susceptible	Susceptible GSS 1.5		Susceptible GSS 1.5		Susceptible GSS 1.5		Susceptible GSS 1.5	Susceptible GSS 1.5	Susceptible GSS 1	Susceptible GSS 1.5		Susceptible GSS 1.5
xaa_404 187161_E35D_M36M_N37S_R41R_I62L_L63P_A71V_N83D_C95C	Susceptible	Susceptible	Susceptible	Susceptible	Susceptible			Susceptible		Susceptible	Susceptible	Susceptible	Susceptible		Susceptible		Susceptible	Susceptible	Susceptible	Susceptible	Susceptible	Susceptible		Susceptible	Susceptible		Potential Low-Level Resistance		Susceptible		Potential Low-Level Resistance	Susceptible	Low-Level Resistance	Potential Low-Level Resistance		Low-Level Resistance	Susceptible GSS 1.5		Susceptible GSS 1.5		Susceptible GSS 1.5		Susceptible GSS 1.5	Susceptible GSS 1.5	Susceptible GSS 1	Susceptible GSS 1.5		Susceptible GSS 1.5
xaa_405 187161_E35D_M36M_N37S_R41R_I62L_L63P_A71V_N83D_C95R	Susceptible	Susceptible	Susceptible	Susceptible	Susceptible			Susceptible		Susceptible	Susceptible	Susceptible	Susceptible		Susceptible		Susceptible	Susceptible	Susceptible	Susceptible	Susceptible	Susceptible		Susceptible	Susceptible		Potential Low-Level Resistance		Susceptible		Potential Low-Level Resistance	Susceptible	Low-Level Resistance	Potential Low-Level Resistance		Low-Level Resistance	Susceptible GSS 1.5		Susceptible GSS 1.5		Susceptible GSS 1.5		Susceptible GSS 1.5	Susceptible GSS 1.5	Susceptible GSS 1	Susceptible GSS 1.5		Susceptible GSS 1.5
xaa_406 187161_E35D_M36M_N37S_R41R_I62L_L63P_A71V_N83N_C95C	Susceptible	Susceptible	Susceptible	Susceptible	Susceptible			Susceptible		Susceptible	Susceptible	Susceptible	Susceptible		Susceptible		Susceptible	Susceptible	Susceptible	Susceptible	Susceptible	Susceptible		Susceptible	Susceptible		Susceptible		Susceptible		Susceptible	Susceptible	Susceptible	Susceptible		Susceptible	Susceptible GSS 1.5		Susceptible GSS 1.5		Susceptible GSS 1.5		Susceptible GSS 1.5	Susceptible GSS 1.5	Susceptible GSS 1	Susceptible GSS 1.5		Susceptible GSS 1.5
xaa_407 187161_E35D_M36M_N37S_R41R_I62L_L63P_A71V_N83N_C95R	Susceptible	Susceptible	Susceptible	Susceptible	Susceptible			Susceptible		Susceptible	Susceptible	Susceptible	Susceptible		Susceptible		Susceptible	Susceptible	Susceptible	Susceptible	Susceptible	Susceptible		Susceptible	Susceptible		Susceptible		Susceptible		Susceptible	Susceptible	Susceptible	Susceptible		Susceptible	Susceptible GSS 1.5		Susceptible GSS 1.5		Susceptible GSS 1.5		Susceptible GSS 1.5	Susceptible GSS 1.5	Susceptible GSS 1	Susceptible GSS 1.5		Susceptible GSS 1.5
xaa_408 187161_E35D_M36M_N37Y_R41R_I62I_L63L_A71A_N83D_C95C	Susceptible	Susceptible	Susceptible	Susceptible	Susceptible			Susceptible		Susceptible	Susceptible	Susceptible	Susceptible		Susceptible		Susceptible	Susceptible	Susceptible	Susceptible	Susceptible	Susceptible		Susceptible	Susceptible		Potential Low-Level Resistance		Susceptible		Potential Low-Level Resistance	Susceptible	Low-Level Resistance	Potential Low-Level Resistance		Low-Level Resistance	Susceptible GSS 1.5		Susceptible GSS 1.5		Susceptible GSS 1.5		Susceptible GSS 1.5	Susceptible GSS 1.5	Susceptible GSS 1	Susceptible GSS 1.5		Susceptible GSS 1.5
xaa_409 187161_E35D_M36M_N37Y_R41R_I62I_L63L_A71A_N83D_C95R	Susceptible	Susceptible	Susceptible	Susceptible	Susceptible			Susceptible		Susceptible	Susceptible	Susceptible	Susceptible		Susceptible		Susceptible	Susceptible	Susceptible	Susceptible	Susceptible	Susceptible		Susceptible	Susceptible		Potential Low-Level Resistance		Susceptible		Potential Low-Level Resistance	Susceptible	Low-Level Resistance	Potential Low-Level Resistance		Low-Level Resistance	Susceptible GSS 1.5		Susceptible GSS 1.5		Susceptible GSS 1.5		Susceptible GSS 1.5	Susceptible GSS 1.5	Susceptible GSS 1	Susceptible GSS 1.5		Susceptible GSS 1.5
xaa_410 187161_E35D_M36M_N37Y_R41R_I62I_L63L_A71A_N83N_C95C	Susceptible	Susceptible	Susceptible	Susceptible	Susceptible			Susceptible		Susceptible	Susceptible	Susceptible	Susceptible		Susceptible		Susceptible	Susceptible	Susceptible	Susceptible	Susceptible	Susceptible		Susceptible	Susceptible		Susceptible		Susceptible		Susceptible	Susceptible	Susceptible	Susceptible		Susceptible	Susceptible GSS 1.5		Susceptible GSS 1.5		Susceptible GSS 1.5		Susceptible GSS 1.5	Susceptible GSS 1.5	Susceptible GSS 1	Susceptible GSS 1.5		Susceptible GSS 1.5
xaa_411 187161_E35D_M36M_N37Y_R41R_I62I_L63L_A71A_N83N_C95R	Susceptible	Susceptible	Susceptible	Susceptible	Susceptible			Susceptible		Susceptible	Susceptible	Susceptible	Susceptible		Susceptible		Susceptible	Susceptible	Susceptible	Susceptible	Susceptible	Susceptible		Susceptible	Susceptible		Susceptible		Susceptible		Susceptible	Susceptible	Susceptible	Susceptible		Susceptible	Susceptible GSS 1.5		Susceptible GSS 1.5		Susceptible GSS 1.5		Susceptible GSS 1.5	Susceptible GSS 1.5	Susceptible GSS 1	Susceptible GSS 1.5		Susceptible GSS 1.5
xaa_412 187161_E35D_M36M_N37Y_R41R_I62I_L63P_A71A_N83D_C95C	Susceptible	Susceptible	Susceptible	Susceptible	Susceptible			Susceptible		Susceptible	Susceptible	Susceptible	Susceptible		Susceptible		Susceptible	Susceptible	Susceptible	Susceptible	Susceptible	Susceptible		Susceptible	Susceptible		Potential Low-Level Resistance		Susceptible		Potential Low-Level Resistance	Susceptible	Low-Level Resistance	Potential Low-Level Resistance		Low-Level Resistance	Susceptible GSS 1.5		Susceptible GSS 1.5		Susceptible GSS 1.5		Susceptible GSS 1.5	Susceptible GSS 1.5	Susceptible GSS 1	Susceptible GSS 1.5		Susceptible GSS 1.5
xaa_413 187161_E35D_M36M_N37Y_R41R_I62I_L63P_A71A_N83D_C95R	Susceptible	Susceptible	Susceptible	Susceptible	Susceptible			Susceptible		Susceptible	Susceptible	Susceptible	Susceptible		Susceptible		Susceptible	Susceptible	Susceptible	Susceptible	Susceptible	Susceptible		Susceptible	Susceptible		Potential Low-Level Resistance		Susceptible		Potential Low-Level Resistance	Susceptible	Low-Level Resistance	Potential Low-Level Resistance		Low-Level Resistance	Susceptible GSS 1.5		Susceptible GSS 1.5		Susceptible GSS 1.5		Susceptible GSS 1.5	Susceptible GSS 1.5	Susceptible GSS 1	Susceptible GSS 1.5		Susceptible GSS 1.5
xaa_414 187161_E35D_M36M_N37Y_R41R_I62I_L63P_A71A_N83N_C95R	Susceptible	Susceptible	Susceptible	Susceptible	Susceptible			Susceptible		Susceptible	Susceptible	Susceptible	Susceptible		Susceptible		Susceptible	Susceptible	Susceptible	Susceptible	Susceptible	Susceptible		Susceptible	Susceptible		Susceptible		Susceptible		Susceptible	Susceptible	Susceptible	Susceptible		Susceptible	Susceptible GSS 1.5		Susceptible GSS 1.5		Susceptible GSS 1.5		Susceptible GSS 1.5	Susceptible GSS 1.5	Susceptible GSS 1	Susceptible GSS 1.5		Susceptible GSS 1.5
xaa_415 187161_E35D_M36M_N37Y_R41R_I62L_L63L_A71A_N83D_C95C	Susceptible	Susceptible	Susceptible	Susceptible	Susceptible			Susceptible		Susceptible	Susceptible	Susceptible	Susceptible		Susceptible		Susceptible	Susceptible	Susceptible	Susceptible	Susceptible	Susceptible		Susceptible	Susceptible		Potential Low-Level Resistance		Susceptible		Potential Low-Level Resistance	Susceptible	Low-Level Resistance	Potential Low-Level Resistance		Low-Level Resistance	Susceptible GSS 1.5		Susceptible GSS 1.5		Susceptible GSS 1.5		Susceptible GSS 1.5	Susceptible GSS 1.5	Susceptible GSS 1	Susceptible GSS 1.5		Susceptible GSS 1.5
xaa_416 187161_E35D_M36M_N37Y_R41R_I62L_L63L_A71A_N83D_C95R	Susceptible	Susceptible	Susceptible	Susceptible	Susceptible			Susceptible		Susceptible	Susceptible	Susceptible	Susceptible		Susceptible		Susceptible	Susceptible	Susceptible	Susceptible	Susceptible	Susceptible		Susceptible	Susceptible		Potential Low-Level Resistance		Susceptible		Potential Low-Level Resistance	Susceptible	Low-Level Resistance	Potential Low-Level Resistance		Low-Level Resistance	Susceptible GSS 1.5		Susceptible GSS 1.5		Susceptible GSS 1.5		Susceptible GSS 1.5	Susceptible GSS 1.5	Susceptible GSS 1	Susceptible GSS 1.5		Susceptible GSS 1.5
xaa_417 187161_E35D_M36M_N37Y_R41R_I62L_L63L_A71A_N83N_C95R	Susceptible	Susceptible	Susceptible	Susceptible	Susceptible			Susceptible		Susceptible	Susceptible	Susceptible	Susceptible		Susceptible		Susceptible	Susceptible	Susceptible	Susceptible	Susceptible	Susceptible		Susceptible	Susceptible		Susceptible		Susceptible		Susceptible	Susceptible	Susceptible	Susceptible		Susceptible	Susceptible GSS 1.5		Susceptible GSS 1.5		Susceptible GSS 1.5		Susceptible GSS 1.5	Susceptible GSS 1.5	Susceptible GSS 1	Susceptible GSS 1.5		Susceptible GSS 1.5
xaa_418 187161_E35E_M36I_N37C_R41K_I62I_L63L_A71A_N83N_C95C	Susceptible	Susceptible	Susceptible	Susceptible	Susceptible			Susceptible		Susceptible	Susceptible	Susceptible	Susceptible		Susceptible		Susceptible	Susceptible	Susceptible	Susceptible	Susceptible	Susceptible		Susceptible	Susceptible		Susceptible		Susceptible		Susceptible	Susceptible	Susceptible	Susceptible		Susceptible	Susceptible GSS 1.5		Susceptible GSS 1.5		Susceptible GSS 1.5		Susceptible GSS 1.5	Susceptible GSS 1.5	Susceptible GSS 1	Susceptible GSS 1.5		Susceptible GSS 1.5
xaa_419 187161_E35E_M36I_N37C_R41K_I62I_L63L_A71A_N83N_C95R	Susceptible	Susceptible	Susceptible	Susceptible	Susceptible			Susceptible		Susceptible	Susceptible	Susceptible	Susceptible		Susceptible		Susceptible	Susceptible	Susceptible	Susceptible	Susceptible	Susceptible		Susceptible	Susceptible		Susceptible		Susceptible		Susceptible	Susceptible	Susceptible	Susceptible		Susceptible	Susceptible GSS 1.5		Susceptible GSS 1.5		Susceptible GSS 1.5		Susceptible GSS 1.5	Susceptible GSS 1.5	Susceptible GSS 1	Susceptible GSS 1.5		Susceptible GSS 1.5
xaa_420 187161_E35E_M36I_N37C_R41K_I62L_L63L_A71A_N83D_C95R	Susceptible	Susceptible	Susceptible	Susceptible	Susceptible			Susceptible		Susceptible	Susceptible	Susceptible	Susceptible		Susceptible		Susceptible	Susceptible	Susceptible	Susceptible	Susceptible	Susceptible		Susceptible	Susceptible		Potential Low-Level Resistance		Susceptible		Potential Low-Level Resistance	Susceptible	Low-Level Resistance	Potential Low-Level Resistance		Low-Level Resistance	Susceptible GSS 1.5		Susceptible GSS 1.5		Susceptible GSS 1.5		Susceptible GSS 1.5	Susceptible GSS 1.5	Susceptible GSS 1	Susceptible GSS 1.5		Susceptible GSS 1.5
xaa_421 187161_E35E_M36I_N37C_R41R_I62I_L63L_A71A_N83D_C95C	Susceptible	Susceptible	Susceptible	Susceptible	Susceptible			Susceptible		Susceptible	Susceptible	Susceptible	Susceptible		Susceptible		Susceptible	Susceptible	Susceptible	Susceptible	Susceptible	Susceptible		Susceptible	Susceptible		Potential Low-Level Resistance		Susceptible		Potential Low-Level Resistance	Susceptible	Low-Level Resistance	Potential Low-Level Resistance		Low-Level Resistance	Susceptible GSS 1.5		Susceptible GSS 1.5		Susceptible GSS 1.5		Susceptible GSS 1.5	Susceptible GSS 1.5	Susceptible GSS 1	Susceptible GSS 1.5		Susceptible GSS 1.5
xaa_422 187161_E35E_M36I_N37C_R41R_I62I_L63L_A71A_N83D_C95R	Susceptible	Susceptible	Susceptible	Susceptible	Susceptible			Susceptible		Susceptible	Susceptible	Susceptible	Susceptible		Susceptible		Susceptible	Susceptible	Susceptible	Susceptible	Susceptible	Susceptible		Susceptible	Susceptible		Potential Low-Level Resistance		Susceptible		Potential Low-Level Resistance	Susceptible	Low-Level Resistance	Potential Low-Level Resistance		Low-Level Resistance	Susceptible GSS 1.5		Susceptible GSS 1.5		Susceptible GSS 1.5		Susceptible GSS 1.5	Susceptible GSS 1.5	Susceptible GSS 1	Susceptible GSS 1.5		Susceptible GSS 1.5
xaa_423 187161_E35E_M36I_N37C_R41R_I62I_L63L_A71A_N83N_C95C	Susceptible	Susceptible	Susceptible	Susceptible	Susceptible			Susceptible		Susceptible	Susceptible	Susceptible	Susceptible		Susceptible		Susceptible	Susceptible	Susceptible	Susceptible	Susceptible	Susceptible		Susceptible	Susceptible		Susceptible		Susceptible		Susceptible	Susceptible	Susceptible	Susceptible		Susceptible	Susceptible GSS 1.5		Susceptible GSS 1.5		Susceptible GSS 1.5		Susceptible GSS 1.5	Susceptible GSS 1.5	Susceptible GSS 1	Susceptible GSS 1.5		Susceptible GSS 1.5
xaa_424 187161_E35E_M36I_N37C_R41R_I62I_L63L_A71A_N83N_C95R	Susceptible	Susceptible	Susceptible	Susceptible	Susceptible			Susceptible		Susceptible	Susceptible	Susceptible	Susceptible		Susceptible		Susceptible	Susceptible	Susceptible	Susceptible	Susceptible	Susceptible		Susceptible	Susceptible		Susceptible		Susceptible		Susceptible	Susceptible	Susceptible	Susceptible		Susceptible	Susceptible GSS 1.5		Susceptible GSS 1.5		Susceptible GSS 1.5		Susceptible GSS 1.5	Susceptible GSS 1.5	Susceptible GSS 1	Susceptible GSS 1.5		Susceptible GSS 1.5
xaa_425 187161_E35E_M36I_N37C_R41R_I62I_L63L_A71V_N83D_C95C	Susceptible	Susceptible	Susceptible	Susceptible	Susceptible			Susceptible		Susceptible	Susceptible	Susceptible	Susceptible		Susceptible		Susceptible	Susceptible	Susceptible	Susceptible	Susceptible	Susceptible		Susceptible	Susceptible		Potential Low-Level Resistance		Susceptible		Potential Low-Level Resistance	Susceptible	Low-Level Resistance	Potential Low-Level Resistance		Low-Level Resistance	Susceptible GSS 1.5		Susceptible GSS 1.5		Susceptible GSS 1.5		Susceptible GSS 1.5	Susceptible GSS 1.5	Susceptible GSS 1	Susceptible GSS 1.5		Susceptible GSS 1.5
xaa_426 187161_E35E_M36I_N37C_R41R_I62I_L63L_A71V_N83D_C95R	Susceptible	Susceptible	Susceptible	Susceptible	Susceptible			Susceptible		Susceptible	Susceptible	Susceptible	Susceptible		Susceptible		Susceptible	Susceptible	Susceptible	Susceptible	Susceptible	Susceptible		Susceptible	Susceptible		Potential Low-Level Resistance		Susceptible		Potential Low-Level Resistance	Susceptible	Low-Level Resistance	Potential Low-Level Resistance		Low-Level Resistance	Susceptible GSS 1.5		Susceptible GSS 1.5		Susceptible GSS 1.5		Susceptible GSS 1.5	Susceptible GSS 1.5	Susceptible GSS 1	Susceptible GSS 1.5		Susceptible GSS 1.5
xaa_427 187161_E35E_M36I_N37C_R41R_I62I_L63L_A71V_N83N_C95C	Susceptible	Susceptible	Susceptible	Susceptible	Susceptible			Susceptible		Susceptible	Susceptible	Susceptible	Susceptible		Susceptible		Susceptible	Susceptible	Susceptible	Susceptible	Susceptible	Susceptible		Susceptible	Susceptible		Susceptible		Susceptible		Susceptible	Susceptible	Susceptible	Susceptible		Susceptible	Susceptible GSS 1.5		Susceptible GSS 1.5		Susceptible GSS 1.5		Susceptible GSS 1.5	Susceptible GSS 1.5	Susceptible GSS 1	Susceptible GSS 1.5		Susceptible GSS 1.5
xaa_428 187161_E35E_M36I_N37C_R41R_I62I_L63L_A71V_N83N_C95R	Susceptible	Susceptible	Susceptible	Susceptible	Susceptible			Susceptible		Susceptible	Susceptible	Susceptible	Susceptible		Susceptible		Susceptible	Susceptible	Susceptible	Susceptible	Susceptible	Susceptible		Susceptible	Susceptible		Susceptible		Susceptible		Susceptible	Susceptible	Susceptible	Susceptible		Susceptible	Susceptible GSS 1.5		Susceptible GSS 1.5		Susceptible GSS 1.5		Susceptible GSS 1.5	Susceptible GSS 1.5	Susceptible GSS 1	Susceptible GSS 1.5		Susceptible GSS 1.5
xaa_429 187161_E35E_M36I_N37C_R41R_I62I_L63P_A71A_N83D_C95C	Susceptible	Susceptible	Susceptible	Susceptible	Susceptible			Susceptible		Susceptible	Susceptible	Susceptible	Susceptible		Susceptible		Susceptible	Susceptible	Susceptible	Susceptible	Susceptible	Susceptible		Susceptible	Susceptible		Potential Low-Level Resistance		Susceptible		Potential Low-Level Resistance	Susceptible	Low-Level Resistance	Potential Low-Level Resistance		Low-Level Resistance	Susceptible GSS 1.5		Susceptible GSS 1.5		Susceptible GSS 1.5		Susceptible GSS 1.5	Susceptible GSS 1.5	Susceptible GSS 1	Susceptible GSS 1.5		Susceptible GSS 1.5
xaa_430 187161_E35E_M36I_N37C_R41R_I62I_L63P_A71A_N83D_C95R	Susceptible	Susceptible	Susceptible	Susceptible	Susceptible			Susceptible		Susceptible	Susceptible	Susceptible	Susceptible		Susceptible		Susceptible	Susceptible	Susceptible	Susceptible	Susceptible	Susceptible		Susceptible	Susceptible		Potential Low-Level Resistance		Susceptible		Potential Low-Level Resistance	Susceptible	Low-Level Resistance	Potential Low-Level Resistance		Low-Level Resistance	Susceptible GSS 1.5		Susceptible GSS 1.5		Susceptible GSS 1.5		Susceptible GSS 1.5	Susceptible GSS 1.5	Susceptible GSS 1	Susceptible GSS 1.5		Susceptible GSS 1.5
xaa_431 187161_E35E_M36I_N37C_R41R_I62I_L63P_A71A_N83N_C95C	Susceptible	Susceptible	Susceptible	Susceptible	Susceptible			Susceptible		Susceptible	Susceptible	Susceptible	Susceptible		Susceptible		Susceptible	Susceptible	Susceptible	Susceptible	Susceptible	Susceptible		Susceptible	Susceptible		Susceptible		Susceptible		Susceptible	Susceptible	Susceptible	Susceptible		Susceptible	Susceptible GSS 1.5		Susceptible GSS 1.5		Susceptible GSS 1.5		Susceptible GSS 1.5	Susceptible GSS 1.5	Susceptible GSS 1	Susceptible GSS 1.5		Susceptible GSS 1.5
xaa_432 187161_E35E_M36I_N37C_R41R_I62I_L63P_A71A_N83N_C95R	Susceptible	Susceptible	Susceptible	Susceptible	Susceptible			Susceptible		Susceptible	Susceptible	Susceptible	Susceptible		Susceptible		Susceptible	Susceptible	Susceptible	Susceptible	Susceptible	Susceptible		Susceptible	Susceptible		Susceptible		Susceptible		Susceptible	Susceptible	Susceptible	Susceptible		Susceptible	Susceptible GSS 1.5		Susceptible GSS 1.5		Susceptible GSS 1.5		Susceptible GSS 1.5	Susceptible GSS 1.5	Susceptible GSS 1	Susceptible GSS 1.5		Susceptible GSS 1.5
xaa_433 187161_E35E_M36I_N37C_R41R_I62L_L63L_A71A_N83D_C95C	Susceptible	Susceptible	Susceptible	Susceptible	Susceptible			Susceptible		Susceptible	Susceptible	Susceptible	Susceptible		Susceptible		Susceptible	Susceptible	Susceptible	Susceptible	Susceptible	Susceptible		Susceptible	Susceptible		Potential Low-Level Resistance		Susceptible		Potential Low-Level Resistance	Susceptible	Low-Level Resistance	Potential Low-Level Resistance		Low-Level Resistance	Susceptible GSS 1.5		Susceptible GSS 1.5		Susceptible GSS 1.5		Susceptible GSS 1.5	Susceptible GSS 1.5	Susceptible GSS 1	Susceptible GSS 1.5		Susceptible GSS 1.5
xaa_434 187161_E35E_M36I_N37C_R41R_I62L_L63L_A71A_N83D_C95R	Susceptible	Susceptible	Susceptible	Susceptible	Susceptible			Susceptible		Susceptible	Susceptible	Susceptible	Susceptible		Susceptible		Susceptible	Susceptible	Susceptible	Susceptible	Susceptible	Susceptible		Susceptible	Susceptible		Potential Low-Level Resistance		Susceptible		Potential Low-Level Resistance	Susceptible	Low-Level Resistance	Potential Low-Level Resistance		Low-Level Resistance	Susceptible GSS 1.5		Susceptible GSS 1.5		Susceptible GSS 1.5		Susceptible GSS 1.5	Susceptible GSS 1.5	Susceptible GSS 1	Susceptible GSS 1.5		Susceptible GSS 1.5
xaa_435 187161_E35E_M36I_N37C_R41R_I62L_L63L_A71A_N83N_C95C	Susceptible	Susceptible	Susceptible	Susceptible	Susceptible			Susceptible		Susceptible	Susceptible	Susceptible	Susceptible		Susceptible		Susceptible	Susceptible	Susceptible	Susceptible	Susceptible	Susceptible		Susceptible	Susceptible		Susceptible		Susceptible		Susceptible	Susceptible	Susceptible	Susceptible		Susceptible	Susceptible GSS 1.5		Susceptible GSS 1.5		Susceptible GSS 1.5		Susceptible GSS 1.5	Susceptible GSS 1.5	Susceptible GSS 1	Susceptible GSS 1.5		Susceptible GSS 1.5
xaa_436 187161_E35E_M36I_N37C_R41R_I62L_L63L_A71A_N83N_C95R	Susceptible	Susceptible	Susceptible	Susceptible	Susceptible			Susceptible		Susceptible	Susceptible	Susceptible	Susceptible		Susceptible		Susceptible	Susceptible	Susceptible	Susceptible	Susceptible	Susceptible		Susceptible	Susceptible		Susceptible		Susceptible		Susceptible	Susceptible	Susceptible	Susceptible		Susceptible	Susceptible GSS 1.5		Susceptible GSS 1.5		Susceptible GSS 1.5		Susceptible GSS 1.5	Susceptible GSS 1.5	Susceptible GSS 1	Susceptible GSS 1.5		Susceptible GSS 1.5
xaa_437 187161_E35E_M36I_N37C_R41R_I62L_L63L_A71V_N83D_C95R	Susceptible	Susceptible	Susceptible	Susceptible	Susceptible			Susceptible		Susceptible	Susceptible	Susceptible	Susceptible		Susceptible		Susceptible	Susceptible	Susceptible	Susceptible	Susceptible	Susceptible		Susceptible	Susceptible		Potential Low-Level Resistance		Susceptible		Potential Low-Level Resistance	Susceptible	Low-Level Resistance	Potential Low-Level Resistance		Low-Level Resistance	Susceptible GSS 1.5		Susceptible GSS 1.5		Susceptible GSS 1.5		Susceptible GSS 1.5	Susceptible GSS 1.5	Susceptible GSS 1	Susceptible GSS 1.5		Susceptible GSS 1.5
xaa_438 187161_E35E_M36I_N37C_R41R_I62L_L63P_A71A_N83D_C95C	Susceptible	Susceptible	Susceptible	Susceptible	Susceptible			Susceptible		Susceptible	Susceptible	Susceptible	Susceptible		Susceptible		Susceptible	Susceptible	Susceptible	Susceptible	Susceptible	Susceptible		Susceptible	Susceptible		Potential Low-Level Resistance		Susceptible		Potential Low-Level Resistance	Susceptible	Low-Level Resistance	Potential Low-Level Resistance		Low-Level Resistance	Susceptible GSS 1.5		Susceptible GSS 1.5		Susceptible GSS 1.5		Susceptible GSS 1.5	Susceptible GSS 1.5	Susceptible GSS 1	Susceptible GSS 1.5		Susceptible GSS 1.5
xaa_439 187161_E35E_M36I_N37C_R41R_I62L_L63P_A71A_N83D_C95R	Susceptible	Susceptible	Susceptible	Susceptible	Susceptible			Susceptible		Susceptible	Susceptible	Susceptible	Susceptible		Susceptible		Susceptible	Susceptible	Susceptible	Susceptible	Susceptible	Susceptible		Susceptible	Susceptible		Potential Low-Level Resistance		Susceptible		Potential Low-Level Resistance	Susceptible	Low-Level Resistance	Potential Low-Level Resistance		Low-Level Resistance	Susceptible GSS 1.5		Susceptible GSS 1.5		Susceptible GSS 1.5		Susceptible GSS 1.5	Susceptible GSS 1.5	Susceptible GSS 1	Susceptible GSS 1.5		Susceptible GSS 1.5
xaa_440 187161_E35E_M36I_N37C_R41R_I62L_L63P_A71A_N83N_C95C	Susceptible	Susceptible	Susceptible	Susceptible	Susceptible			Susceptible		Susceptible	Susceptible	Susceptible	Susceptible		Susceptible		Susceptible	Susceptible	Susceptible	Susceptible	Susceptible	Susceptible		Susceptible	Susceptible		Susceptible		Susceptible		Susceptible	Susceptible	Susceptible	Susceptible		Susceptible	Susceptible GSS 1.5		Susceptible GSS 1.5		Susceptible GSS 1.5		Susceptible GSS 1.5	Susceptible GSS 1.5	Susceptible GSS 1	Susceptible GSS 1.5		Susceptible GSS 1.5
xaa_441 187161_E35E_M36I_N37C_R41R_I62L_L63P_A71A_N83N_C95R	Susceptible	Susceptible	Susceptible	Susceptible	Susceptible			Susceptible		Susceptible	Susceptible	Susceptible	Susceptible		Susceptible		Susceptible	Susceptible	Susceptible	Susceptible	Susceptible	Susceptible		Susceptible	Susceptible		Susceptible		Susceptible		Susceptible	Susceptible	Susceptible	Susceptible		Susceptible	Susceptible GSS 1.5		Susceptible GSS 1.5		Susceptible GSS 1.5		Susceptible GSS 1.5	Susceptible GSS 1.5	Susceptible GSS 1	Susceptible GSS 1.5		Susceptible GSS 1.5
xaa_442 187161_E35E_M36I_N37C_R41R_I62L_L63P_A71V_N83D_C95C	Susceptible	Susceptible	Susceptible	Susceptible	Susceptible			Susceptible		Susceptible	Susceptible	Susceptible	Susceptible		Susceptible		Susceptible	Susceptible	Susceptible	Susceptible	Susceptible	Susceptible		Susceptible	Susceptible		Potential Low-Level Resistance		Susceptible		Potential Low-Level Resistance	Susceptible	Low-Level Resistance	Potential Low-Level Resistance		Low-Level Resistance	Susceptible GSS 1.5		Susceptible GSS 1.5		Susceptible GSS 1.5		Susceptible GSS 1.5	Susceptible GSS 1.5	Susceptible GSS 1	Susceptible GSS 1.5		Susceptible GSS 1.5
xaa_443 187161_E35E_M36I_N37C_R41R_I62L_L63P_A71V_N83D_C95R	Susceptible	Susceptible	Susceptible	Susceptible	Susceptible			Susceptible		Susceptible	Susceptible	Susceptible	Susceptible		Susceptible		Susceptible	Susceptible	Susceptible	Susceptible	Susceptible	Susceptible		Susceptible	Susceptible		Potential Low-Level Resistance		Susceptible		Potential Low-Level Resistance	Susceptible	Low-Level Resistance	Potential Low-Level Resistance		Low-Level Resistance	Susceptible GSS 1.5		Susceptible GSS 1.5		Susceptible GSS 1.5		Susceptible GSS 1.5	Susceptible GSS 1.5	Susceptible GSS 1	Susceptible GSS 1.5		Susceptible GSS 1.5
xaa_444 187161_E35E_M36I_N37C_R41R_I62L_L63P_A71V_N83N_C95C	Susceptible	Susceptible	Susceptible	Susceptible	Susceptible			Susceptible		Susceptible	Susceptible	Susceptible	Susceptible		Susceptible		Susceptible	Susceptible	Susceptible	Susceptible	Susceptible	Susceptible		Susceptible	Susceptible		Susceptible		Susceptible		Susceptible	Susceptible	Susceptible	Susceptible		Susceptible	Susceptible GSS 1.5		Susceptible GSS 1.5		Susceptible GSS 1.5		Susceptible GSS 1.5	Susceptible GSS 1.5	Susceptible GSS 1	Susceptible GSS 1.5		Susceptible GSS 1.5
xaa_445 187161_E35E_M36I_N37C_R41R_I62L_L63P_A71V_N83N_C95R	Susceptible	Susceptible	Susceptible	Susceptible	Susceptible			Susceptible		Susceptible	Susceptible	Susceptible	Susceptible		Susceptible		Susceptible	Susceptible	Susceptible	Susceptible	Susceptible	Susceptible		Susceptible	Susceptible		Susceptible		Susceptible		Susceptible	Susceptible	Susceptible	Susceptible		Susceptible	Susceptible GSS 1.5		Susceptible GSS 1.5		Susceptible GSS 1.5		Susceptible GSS 1.5	Susceptible GSS 1.5	Susceptible GSS 1	Susceptible GSS 1.5		Susceptible GSS 1.5
xaa_446 187161_E35E_M36I_N37N_R41K_I62I_L63L_A71A_N83D_C95C	Susceptible	Susceptible	Susceptible	Susceptible	Susceptible			Susceptible		Susceptible	Susceptible	Susceptible	Susceptible		Susceptible		Susceptible	Susceptible	Susceptible	Susceptible	Susceptible	Susceptible		Susceptible	Susceptible		Potential Low-Level Resistance		Susceptible		Potential Low-Level Resistance	Susceptible	Low-Level Resistance	Potential Low-Level Resistance		Low-Level Resistance	Susceptible GSS 1.5		Susceptible GSS 1.5		Susceptible GSS 1.5		Susceptible GSS 1.5	Susceptible GSS 1.5	Susceptible GSS 1	Susceptible GSS 1.5		Susceptible GSS 1.5
xaa_447 187161_E35E_M36I_N37N_R41K_I62I_L63L_A71A_N83D_C95R	Susceptible	Susceptible	Susceptible	Susceptible	Susceptible			Susceptible		Susceptible	Susceptible	Susceptible	Susceptible		Susceptible		Susceptible	Susceptible	Susceptible	Susceptible	Susceptible	Susceptible		Susceptible	Susceptible		Potential Low-Level Resistance		Susceptible		Potential Low-Level Resistance	Susceptible	Low-Level Resistance	Potential Low-Level Resistance		Low-Level Resistance	Susceptible GSS 1.5		Susceptible GSS 1.5		Susceptible GSS 1.5		Susceptible GSS 1.5	Susceptible GSS 1.5	Susceptible GSS 1	Susceptible GSS 1.5		Susceptible GSS 1.5
xaa_448 187161_E35E_M36I_N37N_R41K_I62I_L63L_A71A_N83N_C95C	Susceptible	Susceptible	Susceptible	Susceptible	Susceptible			Susceptible		Susceptible	Susceptible	Susceptible	Susceptible		Susceptible		Susceptible	Susceptible	Susceptible	Susceptible	Susceptible	Susceptible		Susceptible	Susceptible		Susceptible		Susceptible		Susceptible	Susceptible	Susceptible	Susceptible		Susceptible	Susceptible GSS 1.5		Susceptible GSS 1.5		Susceptible GSS 1.5		Susceptible GSS 1.5	Susceptible GSS 1.5	Susceptible GSS 1	Susceptible GSS 1.5		Susceptible GSS 1.5
xaa_449 187161_E35E_M36I_N37N_R41K_I62I_L63L_A71A_N83N_C95R	Susceptible	Susceptible	Susceptible	Susceptible	Susceptible			Susceptible		Susceptible	Susceptible	Susceptible	Susceptible		Susceptible		Susceptible	Susceptible	Susceptible	Susceptible	Susceptible	Susceptible		Susceptible	Susceptible		Susceptible		Susceptible		Susceptible	Susceptible	Susceptible	Susceptible		Susceptible	Susceptible GSS 1.5		Susceptible GSS 1.5		Susceptible GSS 1.5		Susceptible GSS 1.5	Susceptible GSS 1.5	Susceptible GSS 1	Susceptible GSS 1.5		Susceptible GSS 1.5
xaa_450 187161_E35E_M36I_N37N_R41K_I62I_L63P_A71A_N83D_C95C	Susceptible	Susceptible	Susceptible	Susceptible	Susceptible			Susceptible		Susceptible	Susceptible	Susceptible	Susceptible		Susceptible		Susceptible	Susceptible	Susceptible	Susceptible	Susceptible	Susceptible		Susceptible	Susceptible		Potential Low-Level Resistance		Susceptible		Potential Low-Level Resistance	Susceptible	Low-Level Resistance	Potential Low-Level Resistance		Low-Level Resistance	Susceptible GSS 1.5		Susceptible GSS 1.5		Susceptible GSS 1.5		Susceptible GSS 1.5	Susceptible GSS 1.5	Susceptible GSS 1	Susceptible GSS 1.5		Susceptible GSS 1.5
xaa_451 187161_E35E_M36I_N37N_R41K_I62I_L63P_A71A_N83D_C95R	Susceptible	Susceptible	Susceptible	Susceptible	Susceptible			Susceptible		Susceptible	Susceptible	Susceptible	Susceptible		Susceptible		Susceptible	Susceptible	Susceptible	Susceptible	Susceptible	Susceptible		Susceptible	Susceptible		Potential Low-Level Resistance		Susceptible		Potential Low-Level Resistance	Susceptible	Low-Level Resistance	Potential Low-Level Resistance		Low-Level Resistance	Susceptible GSS 1.5		Susceptible GSS 1.5		Susceptible GSS 1.5		Susceptible GSS 1.5	Susceptible GSS 1.5	Susceptible GSS 1	Susceptible GSS 1.5		Susceptible GSS 1.5
xaa_452 187161_E35E_M36I_N37N_R41K_I62I_L63P_A71A_N83N_C95C	Susceptible	Susceptible	Susceptible	Susceptible	Susceptible			Susceptible		Susceptible	Susceptible	Susceptible	Susceptible		Susceptible		Susceptible	Susceptible	Susceptible	Susceptible	Susceptible	Susceptible		Susceptible	Susceptible		Susceptible		Susceptible		Susceptible	Susceptible	Susceptible	Susceptible		Susceptible	Susceptible GSS 1.5		Susceptible GSS 1.5		Susceptible GSS 1.5		Susceptible GSS 1.5	Susceptible GSS 1.5	Susceptible GSS 1	Susceptible GSS 1.5		Susceptible GSS 1.5
xaa_453 187161_E35E_M36I_N37N_R41K_I62I_L63P_A71A_N83N_C95R	Susceptible	Susceptible	Susceptible	Susceptible	Susceptible			Susceptible		Susceptible	Susceptible	Susceptible	Susceptible		Susceptible		Susceptible	Susceptible	Susceptible	Susceptible	Susceptible	Susceptible		Susceptible	Susceptible		Susceptible		Susceptible		Susceptible	Susceptible	Susceptible	Susceptible		Susceptible	Susceptible GSS 1.5		Susceptible GSS 1.5		Susceptible GSS 1.5		Susceptible GSS 1.5	Susceptible GSS 1.5	Susceptible GSS 1	Susceptible GSS 1.5		Susceptible GSS 1.5
xaa_454 187161_E35E_M36I_N37N_R41K_I62L_L63L_A71A_N83D_C95C	Susceptible	Susceptible	Susceptible	Susceptible	Susceptible			Susceptible		Susceptible	Susceptible	Susceptible	Susceptible		Susceptible		Susceptible	Susceptible	Susceptible	Susceptible	Susceptible	Susceptible		Susceptible	Susceptible		Potential Low-Level Resistance		Susceptible		Potential Low-Level Resistance	Susceptible	Low-Level Resistance	Potential Low-Level Resistance		Low-Level Resistance	Susceptible GSS 1.5		Susceptible GSS 1.5		Susceptible GSS 1.5		Susceptible GSS 1.5	Susceptible GSS 1.5	Susceptible GSS 1	Susceptible GSS 1.5		Susceptible GSS 1.5
xaa_455 187161_E35E_M36I_N37N_R41K_I62L_L63L_A71A_N83D_C95R	Susceptible	Susceptible	Susceptible	Susceptible	Susceptible			Susceptible		Susceptible	Susceptible	Susceptible	Susceptible		Susceptible		Susceptible	Susceptible	Susceptible	Susceptible	Susceptible	Susceptible		Susceptible	Susceptible		Potential Low-Level Resistance		Susceptible		Potential Low-Level Resistance	Susceptible	Low-Level Resistance	Potential Low-Level Resistance		Low-Level Resistance	Susceptible GSS 1.5		Susceptible GSS 1.5		Susceptible GSS 1.5		Susceptible GSS 1.5	Susceptible GSS 1.5	Susceptible GSS 1	Susceptible GSS 1.5		Susceptible GSS 1.5
xaa_456 187161_E35E_M36I_N37N_R41K_I62L_L63L_A71A_N83N_C95C	Susceptible	Susceptible	Susceptible	Susceptible	Susceptible			Susceptible		Susceptible	Susceptible	Susceptible	Susceptible		Susceptible		Susceptible	Susceptible	Susceptible	Susceptible	Susceptible	Susceptible		Susceptible	Susceptible		Susceptible		Susceptible		Susceptible	Susceptible	Susceptible	Susceptible		Susceptible	Susceptible GSS 1.5		Susceptible GSS 1.5		Susceptible GSS 1.5		Susceptible GSS 1.5	Susceptible GSS 1.5	Susceptible GSS 1	Susceptible GSS 1.5		Susceptible GSS 1.5
xaa_457 187161_E35E_M36I_N37N_R41K_I62L_L63L_A71A_N83N_C95R	Susceptible	Susceptible	Susceptible	Susceptible	Susceptible			Susceptible		Susceptible	Susceptible	Susceptible	Susceptible		Susceptible		Susceptible	Susceptible	Susceptible	Susceptible	Susceptible	Susceptible		Susceptible	Susceptible		Susceptible		Susceptible		Susceptible	Susceptible	Susceptible	Susceptible		Susceptible	Susceptible GSS 1.5		Susceptible GSS 1.5		Susceptible GSS 1.5		Susceptible GSS 1.5	Susceptible GSS 1.5	Susceptible GSS 1	Susceptible GSS 1.5		Susceptible GSS 1.5
xaa_458 187161_E35E_M36I_N37N_R41K_I62L_L63P_A71A_N83D_C95C	Susceptible	Susceptible	Susceptible	Susceptible	Susceptible			Susceptible		Susceptible	Susceptible	Susceptible	Susceptible		Susceptible		Susceptible	Susceptible	Susceptible	Susceptible	Susceptible	Susceptible		Susceptible	Susceptible		Potential Low-Level Resistance		Susceptible		Potential Low-Level Resistance	Susceptible	Low-Level Resistance	Potential Low-Level Resistance		Low-Level Resistance	Susceptible GSS 1.5		Susceptible GSS 1.5		Susceptible GSS 1.5		Susceptible GSS 1.5	Susceptible GSS 1.5	Susceptible GSS 1	Susceptible GSS 1.5		Susceptible GSS 1.5
xaa_459 187161_E35E_M36I_N37N_R41K_I62L_L63P_A71A_N83N_C95C	Susceptible	Susceptible	Susceptible	Susceptible	Susceptible			Susceptible		Susceptible	Susceptible	Susceptible	Susceptible		Susceptible		Susceptible	Susceptible	Susceptible	Susceptible	Susceptible	Susceptible		Susceptible	Susceptible		Susceptible		Susceptible		Susceptible	Susceptible	Susceptible	Susceptible		Susceptible	Susceptible GSS 1.5		Susceptible GSS 1.5		Susceptible GSS 1.5		Susceptible GSS 1.5	Susceptible GSS 1.5	Susceptible GSS 1	Susceptible GSS 1.5		Susceptible GSS 1.5
xaa_460 187161_E35E_M36I_N37N_R41K_I62L_L63P_A71A_N83N_C95R	Susceptible	Susceptible	Susceptible	Susceptible	Susceptible			Susceptible		Susceptible	Susceptible	Susceptible	Susceptible		Susceptible		Susceptible	Susceptible	Susceptible	Susceptible	Susceptible	Susceptible		Susceptible	Susceptible		Susceptible		Susceptible		Susceptible	Susceptible	Susceptible	Susceptible		Susceptible	Susceptible GSS 1.5		Susceptible GSS 1.5		Susceptible GSS 1.5		Susceptible GSS 1.5	Susceptible GSS 1.5	Susceptible GSS 1	Susceptible GSS 1.5		Susceptible GSS 1.5
xaa_461 187161_E35E_M36I_N37N_R41K_I62L_L63P_A71V_N83D_C95C	Susceptible	Susceptible	Susceptible	Susceptible	Susceptible			Susceptible		Susceptible	Susceptible	Susceptible	Susceptible		Susceptible		Susceptible	Susceptible	Susceptible	Susceptible	Susceptible	Susceptible		Susceptible	Susceptible		Potential Low-Level Resistance		Susceptible		Potential Low-Level Resistance	Susceptible	Low-Level Resistance	Potential Low-Level Resistance		Low-Level Resistance	Susceptible GSS 1.5		Susceptible GSS 1.5		Susceptible GSS 1.5		Susceptible GSS 1.5	Susceptible GSS 1.5	Susceptible GSS 1	Susceptible GSS 1.5		Susceptible GSS 1.5
xaa_462 187161_E35E_M36I_N37N_R41K_I62L_L63P_A71V_N83D_C95R	Susceptible	Susceptible	Susceptible	Susceptible	Susceptible			Susceptible		Susceptible	Susceptible	Susceptible	Susceptible		Susceptible		Susceptible	Susceptible	Susceptible	Susceptible	Susceptible	Susceptible		Susceptible	Susceptible		Potential Low-Level Resistance		Susceptible		Potential Low-Level Resistance	Susceptible	Low-Level Resistance	Potential Low-Level Resistance		Low-Level Resistance	Susceptible GSS 1.5		Susceptible GSS 1.5		Susceptible GSS 1.5		Susceptible GSS 1.5	Susceptible GSS 1.5	Susceptible GSS 1	Susceptible GSS 1.5		Susceptible GSS 1.5
xaa_463 187161_E35E_M36I_N37N_R41K_I62L_L63P_A71V_N83N_C95C	Susceptible	Susceptible	Susceptible	Susceptible	Susceptible			Susceptible		Susceptible	Susceptible	Susceptible	Susceptible		Susceptible		Susceptible	Susceptible	Susceptible	Susceptible	Susceptible	Susceptible		Susceptible	Susceptible		Susceptible		Susceptible		Susceptible	Susceptible	Susceptible	Susceptible		Susceptible	Susceptible GSS 1.5		Susceptible GSS 1.5		Susceptible GSS 1.5		Susceptible GSS 1.5	Susceptible GSS 1.5	Susceptible GSS 1	Susceptible GSS 1.5		Susceptible GSS 1.5
xaa_464 187161_E35E_M36I_N37N_R41K_I62L_L63P_A71V_N83N_C95R	Susceptible	Susceptible	Susceptible	Susceptible	Susceptible			Susceptible		Susceptible	Susceptible	Susceptible	Susceptible		Susceptible		Susceptible	Susceptible	Susceptible	Susceptible	Susceptible	Susceptible		Susceptible	Susceptible		Susceptible		Susceptible		Susceptible	Susceptible	Susceptible	Susceptible		Susceptible	Susceptible GSS 1.5		Susceptible GSS 1.5		Susceptible GSS 1.5		Susceptible GSS 1.5	Susceptible GSS 1.5	Susceptible GSS 1	Susceptible GSS 1.5		Susceptible GSS 1.5
xaa_465 187161_E35E_M36I_N37N_R41R_I62I_L63L_A71A_N83D_C95C	Susceptible	Susceptible	Susceptible	Susceptible	Susceptible			Susceptible		Susceptible	Susceptible	Susceptible	Susceptible		Susceptible		Susceptible	Susceptible	Susceptible	Susceptible	Susceptible	Susceptible		Susceptible	Susceptible		Potential Low-Level Resistance		Susceptible		Potential Low-Level Resistance	Susceptible	Low-Level Resistance	Potential Low-Level Resistance		Low-Level Resistance	Susceptible GSS 1.5		Susceptible GSS 1.5		Susceptible GSS 1.5		Susceptible GSS 1.5	Susceptible GSS 1.5	Susceptible GSS 1	Susceptible GSS 1.5		Susceptible GSS 1.5
xaa_466 187161_E35E_M36I_N37N_R41R_I62I_L63L_A71A_N83D_C95R	Susceptible	Susceptible	Susceptible	Susceptible	Susceptible			Susceptible		Susceptible	Susceptible	Susceptible	Susceptible		Susceptible		Susceptible	Susceptible	Susceptible	Susceptible	Susceptible	Susceptible		Susceptible	Susceptible		Potential Low-Level Resistance		Susceptible		Potential Low-Level Resistance	Susceptible	Low-Level Resistance	Potential Low-Level Resistance		Low-Level Resistance	Susceptible GSS 1.5		Susceptible GSS 1.5		Susceptible GSS 1.5		Susceptible GSS 1.5	Susceptible GSS 1.5	Susceptible GSS 1	Susceptible GSS 1.5		Susceptible GSS 1.5
xaa_467 187161_E35E_M36I_N37N_R41R_I62I_L63L_A71A_N83N_C95C	Susceptible	Susceptible	Susceptible	Susceptible	Susceptible			Susceptible		Susceptible	Susceptible	Susceptible	Susceptible		Susceptible		Susceptible	Susceptible	Susceptible	Susceptible	Susceptible	Susceptible		Susceptible	Susceptible		Susceptible		Susceptible		Susceptible	Susceptible	Susceptible	Susceptible		Susceptible	Susceptible GSS 1.5		Susceptible GSS 1.5		Susceptible GSS 1.5		Susceptible GSS 1.5	Susceptible GSS 1.5	Susceptible GSS 1	Susceptible GSS 1.5		Susceptible GSS 1.5
xaa_468 187161_E35E_M36I_N37N_R41R_I62I_L63L_A71A_N83N_C95R	Susceptible	Susceptible	Susceptible	Susceptible	Susceptible			Susceptible		Susceptible	Susceptible	Susceptible	Susceptible		Susceptible		Susceptible	Susceptible	Susceptible	Susceptible	Susceptible	Susceptible		Susceptible	Susceptible		Susceptible		Susceptible		Susceptible	Susceptible	Susceptible	Susceptible		Susceptible	Susceptible GSS 1.5		Susceptible GSS 1.5		Susceptible GSS 1.5		Susceptible GSS 1.5	Susceptible GSS 1.5	Susceptible GSS 1	Susceptible GSS 1.5		Susceptible GSS 1.5
xaa_469 187161_E35E_M36I_N37N_R41R_I62I_L63L_A71V_N83D_C95C	Susceptible	Susceptible	Susceptible	Susceptible	Susceptible			Susceptible		Susceptible	Susceptible	Susceptible	Susceptible		Susceptible		Susceptible	Susceptible	Susceptible	Susceptible	Susceptible	Susceptible		Susceptible	Susceptible		Potential Low-Level Resistance		Susceptible		Potential Low-Level Resistance	Susceptible	Low-Level Resistance	Potential Low-Level Resistance		Low-Level Resistance	Susceptible GSS 1.5		Susceptible GSS 1.5		Susceptible GSS 1.5		Susceptible GSS 1.5	Susceptible GSS 1.5	Susceptible GSS 1	Susceptible GSS 1.5		Susceptible GSS 1.5
xaa_470 187161_E35E_M36I_N37N_R41R_I62I_L63L_A71V_N83D_C95R	Susceptible	Susceptible	Susceptible	Susceptible	Susceptible			Susceptible		Susceptible	Susceptible	Susceptible	Susceptible		Susceptible		Susceptible	Susceptible	Susceptible	Susceptible	Susceptible	Susceptible		Susceptible	Susceptible		Potential Low-Level Resistance		Susceptible		Potential Low-Level Resistance	Susceptible	Low-Level Resistance	Potential Low-Level Resistance		Low-Level Resistance	Susceptible GSS 1.5		Susceptible GSS 1.5		Susceptible GSS 1.5		Susceptible GSS 1.5	Susceptible GSS 1.5	Susceptible GSS 1	Susceptible GSS 1.5		Susceptible GSS 1.5
xaa_471 187161_E35E_M36I_N37N_R41R_I62I_L63L_A71V_N83N_C95C	Susceptible	Susceptible	Susceptible	Susceptible	Susceptible			Susceptible		Susceptible	Susceptible	Susceptible	Susceptible		Susceptible		Susceptible	Susceptible	Susceptible	Susceptible	Susceptible	Susceptible		Susceptible	Susceptible		Susceptible		Susceptible		Susceptible	Susceptible	Susceptible	Susceptible		Susceptible	Susceptible GSS 1.5		Susceptible GSS 1.5		Susceptible GSS 1.5		Susceptible GSS 1.5	Susceptible GSS 1.5	Susceptible GSS 1	Susceptible GSS 1.5		Susceptible GSS 1.5
xaa_472 187161_E35E_M36I_N37N_R41R_I62I_L63L_A71V_N83N_C95R	Susceptible	Susceptible	Susceptible	Susceptible	Susceptible			Susceptible		Susceptible	Susceptible	Susceptible	Susceptible		Susceptible		Susceptible	Susceptible	Susceptible	Susceptible	Susceptible	Susceptible		Susceptible	Susceptible		Susceptible		Susceptible		Susceptible	Susceptible	Susceptible	Susceptible		Susceptible	Susceptible GSS 1.5		Susceptible GSS 1.5		Susceptible GSS 1.5		Susceptible GSS 1.5	Susceptible GSS 1.5	Susceptible GSS 1	Susceptible GSS 1.5		Susceptible GSS 1.5
xaa_473 187161_E35E_M36I_N37N_R41R_I62I_L63P_A71A_N83D_C95C	Susceptible	Susceptible	Susceptible	Susceptible	Susceptible			Susceptible		Susceptible	Susceptible	Susceptible	Susceptible		Susceptible		Susceptible	Susceptible	Susceptible	Susceptible	Susceptible	Susceptible		Susceptible	Susceptible		Potential Low-Level Resistance		Susceptible		Potential Low-Level Resistance	Susceptible	Low-Level Resistance	Potential Low-Level Resistance		Low-Level Resistance	Susceptible GSS 1.5		Susceptible GSS 1.5		Susceptible GSS 1.5		Susceptible GSS 1.5	Susceptible GSS 1.5	Susceptible GSS 1	Susceptible GSS 1.5		Susceptible GSS 1.5
xaa_474 187161_E35E_M36I_N37N_R41R_I62I_L63P_A71A_N83D_C95R	Susceptible	Susceptible	Susceptible	Susceptible	Susceptible			Susceptible		Susceptible	Susceptible	Susceptible	Susceptible		Susceptible		Susceptible	Susceptible	Susceptible	Susceptible	Susceptible	Susceptible		Susceptible	Susceptible		Potential Low-Level Resistance		Susceptible		Potential Low-Level Resistance	Susceptible	Low-Level Resistance	Potential Low-Level Resistance		Low-Level Resistance	Susceptible GSS 1.5		Susceptible GSS 1.5		Susceptible GSS 1.5		Susceptible GSS 1.5	Susceptible GSS 1.5	Susceptible GSS 1	Susceptible GSS 1.5		Susceptible GSS 1.5
xaa_475 187161_E35E_M36I_N37N_R41R_I62I_L63P_A71A_N83N_C95C	Susceptible	Susceptible	Susceptible	Susceptible	Susceptible			Susceptible		Susceptible	Susceptible	Susceptible	Susceptible		Susceptible		Susceptible	Susceptible	Susceptible	Susceptible	Susceptible	Susceptible		Susceptible	Susceptible		Susceptible		Susceptible		Susceptible	Susceptible	Susceptible	Susceptible		Susceptible	Susceptible GSS 1.5		Susceptible GSS 1.5		Susceptible GSS 1.5		Susceptible GSS 1.5	Susceptible GSS 1.5	Susceptible GSS 1	Susceptible GSS 1.5		Susceptible GSS 1.5
xaa_476 187161_E35E_M36I_N37N_R41R_I62I_L63P_A71A_N83N_C95R	Susceptible	Susceptible	Susceptible	Susceptible	Susceptible			Susceptible		Susceptible	Susceptible	Susceptible	Susceptible		Susceptible		Susceptible	Susceptible	Susceptible	Susceptible	Susceptible	Susceptible		Susceptible	Susceptible		Susceptible		Susceptible		Susceptible	Susceptible	Susceptible	Susceptible		Susceptible	Susceptible GSS 1.5		Susceptible GSS 1.5		Susceptible GSS 1.5		Susceptible GSS 1.5	Susceptible GSS 1.5	Susceptible GSS 1	Susceptible GSS 1.5		Susceptible GSS 1.5
xaa_477 187161_E35E_M36I_N37N_R41R_I62I_L63P_A71V_N83D_C95C	Susceptible	Susceptible	Susceptible	Susceptible	Susceptible			Susceptible		Susceptible	Susceptible	Susceptible	Susceptible		Susceptible		Susceptible	Susceptible	Susceptible	Susceptible	Susceptible	Susceptible		Susceptible	Susceptible		Potential Low-Level Resistance		Susceptible		Potential Low-Level Resistance	Susceptible	Low-Level Resistance	Potential Low-Level Resistance		Low-Level Resistance	Susceptible GSS 1.5		Susceptible GSS 1.5		Susceptible GSS 1.5		Susceptible GSS 1.5	Susceptible GSS 1.5	Susceptible GSS 1	Susceptible GSS 1.5		Susceptible GSS 1.5
xaa_478 187161_E35E_M36I_N37N_R41R_I62I_L63P_A71V_N83D_C95R	Susceptible	Susceptible	Susceptible	Susceptible	Susceptible			Susceptible		Susceptible	Susceptible	Susceptible	Susceptible		Susceptible		Susceptible	Susceptible	Susceptible	Susceptible	Susceptible	Susceptible		Susceptible	Susceptible		Potential Low-Level Resistance		Susceptible		Potential Low-Level Resistance	Susceptible	Low-Level Resistance	Potential Low-Level Resistance		Low-Level Resistance	Susceptible GSS 1.5		Susceptible GSS 1.5		Susceptible GSS 1.5		Susceptible GSS 1.5	Susceptible GSS 1.5	Susceptible GSS 1	Susceptible GSS 1.5		Susceptible GSS 1.5
xaa_479 187161_E35E_M36I_N37N_R41R_I62I_L63P_A71V_N83N_C95C	Susceptible	Susceptible	Susceptible	Susceptible	Susceptible			Susceptible		Susceptible	Susceptible	Susceptible	Susceptible		Susceptible		Susceptible	Susceptible	Susceptible	Susceptible	Susceptible	Susceptible		Susceptible	Susceptible		Susceptible		Susceptible		Susceptible	Susceptible	Susceptible	Susceptible		Susceptible	Susceptible GSS 1.5		Susceptible GSS 1.5		Susceptible GSS 1.5		Susceptible GSS 1.5	Susceptible GSS 1.5	Susceptible GSS 1	Susceptible GSS 1.5		Susceptible GSS 1.5
xaa_480 187161_E35E_M36I_N37N_R41R_I62I_L63P_A71V_N83N_C95R	Susceptible	Susceptible	Susceptible	Susceptible	Susceptible			Susceptible		Susceptible	Susceptible	Susceptible	Susceptible		Susceptible		Susceptible	Susceptible	Susceptible	Susceptible	Susceptible	Susceptible		Susceptible	Susceptible		Susceptible		Susceptible		Susceptible	Susceptible	Susceptible	Susceptible		Susceptible	Susceptible GSS 1.5		Susceptible GSS 1.5		Susceptible GSS 1.5		Susceptible GSS 1.5	Susceptible GSS 1.5	Susceptible GSS 1	Susceptible GSS 1.5		Susceptible GSS 1.5
xaa_481 187161_E35E_M36I_N37N_R41R_I62L_L63L_A71A_N83D_C95C	Susceptible	Susceptible	Susceptible	Susceptible	Susceptible			Susceptible		Susceptible	Susceptible	Susceptible	Susceptible		Susceptible		Susceptible	Susceptible	Susceptible	Susceptible	Susceptible	Susceptible		Susceptible	Susceptible		Potential Low-Level Resistance		Susceptible		Potential Low-Level Resistance	Susceptible	Low-Level Resistance	Potential Low-Level Resistance		Low-Level Resistance	Susceptible GSS 1.5		Susceptible GSS 1.5		Susceptible GSS 1.5		Susceptible GSS 1.5	Susceptible GSS 1.5	Susceptible GSS 1	Susceptible GSS 1.5		Susceptible GSS 1.5
xaa_482 187161_E35E_M36I_N37N_R41R_I62L_L63L_A71A_N83D_C95R	Susceptible	Susceptible	Susceptible	Susceptible	Susceptible			Susceptible		Susceptible	Susceptible	Susceptible	Susceptible		Susceptible		Susceptible	Susceptible	Susceptible	Susceptible	Susceptible	Susceptible		Susceptible	Susceptible		Potential Low-Level Resistance		Susceptible		Potential Low-Level Resistance	Susceptible	Low-Level Resistance	Potential Low-Level Resistance		Low-Level Resistance	Susceptible GSS 1.5		Susceptible GSS 1.5		Susceptible GSS 1.5		Susceptible GSS 1.5	Susceptible GSS 1.5	Susceptible GSS 1	Susceptible GSS 1.5		Susceptible GSS 1.5
xaa_483 187161_E35E_M36I_N37N_R41R_I62L_L63L_A71A_N83N_C95C	Susceptible	Susceptible	Susceptible	Susceptible	Susceptible			Susceptible		Susceptible	Susceptible	Susceptible	Susceptible		Susceptible		Susceptible	Susceptible	Susceptible	Susceptible	Susceptible	Susceptible		Susceptible	Susceptible		Susceptible		Susceptible		Susceptible	Susceptible	Susceptible	Susceptible		Susceptible	Susceptible GSS 1.5		Susceptible GSS 1.5		Susceptible GSS 1.5		Susceptible GSS 1.5	Susceptible GSS 1.5	Susceptible GSS 1	Susceptible GSS 1.5		Susceptible GSS 1.5
xaa_484 187161_E35E_M36I_N37N_R41R_I62L_L63L_A71A_N83N_C95R	Susceptible	Susceptible	Susceptible	Susceptible	Susceptible			Susceptible		Susceptible	Susceptible	Susceptible	Susceptible		Susceptible		Susceptible	Susceptible	Susceptible	Susceptible	Susceptible	Susceptible		Susceptible	Susceptible		Susceptible		Susceptible		Susceptible	Susceptible	Susceptible	Susceptible		Susceptible	Susceptible GSS 1.5		Susceptible GSS 1.5		Susceptible GSS 1.5		Susceptible GSS 1.5	Susceptible GSS 1.5	Susceptible GSS 1	Susceptible GSS 1.5		Susceptible GSS 1.5
xaa_485 187161_E35E_M36I_N37N_R41R_I62L_L63L_A71V_N83D_C95C	Susceptible	Susceptible	Susceptible	Susceptible	Susceptible			Susceptible		Susceptible	Susceptible	Susceptible	Susceptible		Susceptible		Susceptible	Susceptible	Susceptible	Susceptible	Susceptible	Susceptible		Susceptible	Susceptible		Potential Low-Level Resistance		Susceptible		Potential Low-Level Resistance	Susceptible	Low-Level Resistance	Potential Low-Level Resistance		Low-Level Resistance	Susceptible GSS 1.5		Susceptible GSS 1.5		Susceptible GSS 1.5		Susceptible GSS 1.5	Susceptible GSS 1.5	Susceptible GSS 1	Susceptible GSS 1.5		Susceptible GSS 1.5
xaa_486 187161_E35E_M36I_N37N_R41R_I62L_L63L_A71V_N83D_C95R	Susceptible	Susceptible	Susceptible	Susceptible	Susceptible			Susceptible		Susceptible	Susceptible	Susceptible	Susceptible		Susceptible		Susceptible	Susceptible	Susceptible	Susceptible	Susceptible	Susceptible		Susceptible	Susceptible		Potential Low-Level Resistance		Susceptible		Potential Low-Level Resistance	Susceptible	Low-Level Resistance	Potential Low-Level Resistance		Low-Level Resistance	Susceptible GSS 1.5		Susceptible GSS 1.5		Susceptible GSS 1.5		Susceptible GSS 1.5	Susceptible GSS 1.5	Susceptible GSS 1	Susceptible GSS 1.5		Susceptible GSS 1.5
xaa_487 187161_E35E_M36I_N37N_R41R_I62L_L63L_A71V_N83N_C95R	Susceptible	Susceptible	Susceptible	Susceptible	Susceptible			Susceptible		Susceptible	Susceptible	Susceptible	Susceptible		Susceptible		Susceptible	Susceptible	Susceptible	Susceptible	Susceptible	Susceptible		Susceptible	Susceptible		Susceptible		Susceptible		Susceptible	Susceptible	Susceptible	Susceptible		Susceptible	Susceptible GSS 1.5		Susceptible GSS 1.5		Susceptible GSS 1.5		Susceptible GSS 1.5	Susceptible GSS 1.5	Susceptible GSS 1	Susceptible GSS 1.5		Susceptible GSS 1.5
xaa_488 187161_E35E_M36I_N37N_R41R_I62L_L63P_A71A_N83D_C95C	Susceptible	Susceptible	Susceptible	Susceptible	Susceptible			Susceptible		Susceptible	Susceptible	Susceptible	Susceptible		Susceptible		Susceptible	Susceptible	Susceptible	Susceptible	Susceptible	Susceptible		Susceptible	Susceptible		Potential Low-Level Resistance		Susceptible		Potential Low-Level Resistance	Susceptible	Low-Level Resistance	Potential Low-Level Resistance		Low-Level Resistance	Susceptible GSS 1.5		Susceptible GSS 1.5		Susceptible GSS 1.5		Susceptible GSS 1.5	Susceptible GSS 1.5	Susceptible GSS 1	Susceptible GSS 1.5		Susceptible GSS 1.5
xaa_489 187161_E35E_M36I_N37N_R41R_I62L_L63P_A71A_N83D_C95R	Susceptible	Susceptible	Susceptible	Susceptible	Susceptible			Susceptible		Susceptible	Susceptible	Susceptible	Susceptible		Susceptible		Susceptible	Susceptible	Susceptible	Susceptible	Susceptible	Susceptible		Susceptible	Susceptible		Potential Low-Level Resistance		Susceptible		Potential Low-Level Resistance	Susceptible	Low-Level Resistance	Potential Low-Level Resistance		Low-Level Resistance	Susceptible GSS 1.5		Susceptible GSS 1.5		Susceptible GSS 1.5		Susceptible GSS 1.5	Susceptible GSS 1.5	Susceptible GSS 1	Susceptible GSS 1.5		Susceptible GSS 1.5
xaa_490 187161_E35E_M36I_N37N_R41R_I62L_L63P_A71A_N83N_C95C	Susceptible	Susceptible	Susceptible	Susceptible	Susceptible			Susceptible		Susceptible	Susceptible	Susceptible	Susceptible		Susceptible		Susceptible	Susceptible	Susceptible	Susceptible	Susceptible	Susceptible		Susceptible	Susceptible		Susceptible		Susceptible		Susceptible	Susceptible	Susceptible	Susceptible		Susceptible	Susceptible GSS 1.5		Susceptible GSS 1.5		Susceptible GSS 1.5		Susceptible GSS 1.5	Susceptible GSS 1.5	Susceptible GSS 1	Susceptible GSS 1.5		Susceptible GSS 1.5
xaa_491 187161_E35E_M36I_N37N_R41R_I62L_L63P_A71A_N83N_C95R	Susceptible	Susceptible	Susceptible	Susceptible	Susceptible			Susceptible		Susceptible	Susceptible	Susceptible	Susceptible		Susceptible		Susceptible	Susceptible	Susceptible	Susceptible	Susceptible	Susceptible		Susceptible	Susceptible		Susceptible		Susceptible		Susceptible	Susceptible	Susceptible	Susceptible		Susceptible	Susceptible GSS 1.5		Susceptible GSS 1.5		Susceptible GSS 1.5		Susceptible GSS 1.5	Susceptible GSS 1.5	Susceptible GSS 1	Susceptible GSS 1.5		Susceptible GSS 1.5
xaa_492 187161_E35E_M36I_N37N_R41R_I62L_L63P_A71V_N83D_C95C	Susceptible	Susceptible	Susceptible	Susceptible	Susceptible			Susceptible		Susceptible	Susceptible	Susceptible	Susceptible		Susceptible		Susceptible	Susceptible	Susceptible	Susceptible	Susceptible	Susceptible		Susceptible	Susceptible		Potential Low-Level Resistance		Susceptible		Potential Low-Level Resistance	Susceptible	Low-Level Resistance	Potential Low-Level Resistance		Low-Level Resistance	Susceptible GSS 1.5		Susceptible GSS 1.5		Susceptible GSS 1.5		Susceptible GSS 1.5	Susceptible GSS 1.5	Susceptible GSS 1	Susceptible GSS 1.5		Susceptible GSS 1.5
xaa_493 187161_E35E_M36I_N37N_R41R_I62L_L63P_A71V_N83D_C95R	Susceptible	Susceptible	Susceptible	Susceptible	Susceptible			Susceptible		Susceptible	Susceptible	Susceptible	Susceptible		Susceptible		Susceptible	Susceptible	Susceptible	Susceptible	Susceptible	Susceptible		Susceptible	Susceptible		Potential Low-Level Resistance		Susceptible		Potential Low-Level Resistance	Susceptible	Low-Level Resistance	Potential Low-Level Resistance		Low-Level Resistance	Susceptible GSS 1.5		Susceptible GSS 1.5		Susceptible GSS 1.5		Susceptible GSS 1.5	Susceptible GSS 1.5	Susceptible GSS 1	Susceptible GSS 1.5		Susceptible GSS 1.5
xaa_494 187161_E35E_M36I_N37N_R41R_I62L_L63P_A71V_N83N_C95C	Susceptible	Susceptible	Susceptible	Susceptible	Susceptible			Susceptible		Susceptible	Susceptible	Susceptible	Susceptible		Susceptible		Susceptible	Susceptible	Susceptible	Susceptible	Susceptible	Susceptible		Susceptible	Susceptible		Susceptible		Susceptible		Susceptible	Susceptible	Susceptible	Susceptible		Susceptible	Susceptible GSS 1.5		Susceptible GSS 1.5		Susceptible GSS 1.5		Susceptible GSS 1.5	Susceptible GSS 1.5	Susceptible GSS 1	Susceptible GSS 1.5		Susceptible GSS 1.5
xaa_495 187161_E35E_M36I_N37N_R41R_I62L_L63P_A71V_N83N_C95R	Susceptible	Susceptible	Susceptible	Susceptible	Susceptible			Susceptible		Susceptible	Susceptible	Susceptible	Susceptible		Susceptible		Susceptible	Susceptible	Susceptible	Susceptible	Susceptible	Susceptible		Susceptible	Susceptible		Susceptible		Susceptible		Susceptible	Susceptible	Susceptible	Susceptible		Susceptible	Susceptible GSS 1.5		Susceptible GSS 1.5		Susceptible GSS 1.5		Susceptible GSS 1.5	Susceptible GSS 1.5	Susceptible GSS 1	Susceptible GSS 1.5		Susceptible GSS 1.5
xaa_496 187161_E35E_M36I_N37S_R41K_I62I_L63L_A71A_N83D_C95C	Susceptible	Susceptible	Susceptible	Susceptible	Susceptible			Susceptible		Susceptible	Susceptible	Susceptible	Susceptible		Susceptible		Susceptible	Susceptible	Susceptible	Susceptible	Susceptible	Susceptible		Susceptible	Susceptible		Potential Low-Level Resistance		Susceptible		Potential Low-Level Resistance	Susceptible	Low-Level Resistance	Potential Low-Level Resistance		Low-Level Resistance	Susceptible GSS 1.5		Susceptible GSS 1.5		Susceptible GSS 1.5		Susceptible GSS 1.5	Susceptible GSS 1.5	Susceptible GSS 1	Susceptible GSS 1.5		Susceptible GSS 1.5
xaa_497 187161_E35E_M36I_N37S_R41K_I62I_L63L_A71A_N83D_C95R	Susceptible	Susceptible	Susceptible	Susceptible	Susceptible			Susceptible		Susceptible	Susceptible	Susceptible	Susceptible		Susceptible		Susceptible	Susceptible	Susceptible	Susceptible	Susceptible	Susceptible		Susceptible	Susceptible		Potential Low-Level Resistance		Susceptible		Potential Low-Level Resistance	Susceptible	Low-Level Resistance	Potential Low-Level Resistance		Low-Level Resistance	Susceptible GSS 1.5		Susceptible GSS 1.5		Susceptible GSS 1.5		Susceptible GSS 1.5	Susceptible GSS 1.5	Susceptible GSS 1	Susceptible GSS 1.5		Susceptible GSS 1.5
xaa_498 187161_E35E_M36I_N37S_R41K_I62I_L63L_A71A_N83N_C95C	Susceptible	Susceptible	Susceptible	Susceptible	Susceptible			Susceptible		Susceptible	Susceptible	Susceptible	Susceptible		Susceptible		Susceptible	Susceptible	Susceptible	Susceptible	Susceptible	Susceptible		Susceptible	Susceptible		Susceptible		Susceptible		Susceptible	Susceptible	Susceptible	Susceptible		Susceptible	Susceptible GSS 1.5		Susceptible GSS 1.5		Susceptible GSS 1.5		Susceptible GSS 1.5	Susceptible GSS 1.5	Susceptible GSS 1	Susceptible GSS 1.5		Susceptible GSS 1.5
xaa_499 187161_E35E_M36I_N37S_R41K_I62I_L63L_A71A_N83N_C95R	Susceptible	Susceptible	Susceptible	Susceptible	Susceptible			Susceptible		Susceptible	Susceptible	Susceptible	Susceptible		Susceptible		Susceptible	Susceptible	Susceptible	Susceptible	Susceptible	Susceptible		Susceptible	Susceptible		Susceptible		Susceptible		Susceptible	Susceptible	Susceptible	Susceptible		Susceptible	Susceptible GSS 1.5		Susceptible GSS 1.5		Susceptible GSS 1.5		Susceptible GSS 1.5	Susceptible GSS 1.5	Susceptible GSS 1	Susceptible GSS 1.5		Susceptible GSS 1.5
xaa_500 187161_E35E_M36I_N37S_R41K_I62I_L63P_A71A_N83D_C95R	Susceptible	Susceptible	Susceptible	Susceptible	Susceptible			Susceptible		Susceptible	Susceptible	Susceptible	Susceptible		Susceptible		Susceptible	Susceptible	Susceptible	Susceptible	Susceptible	Susceptible		Susceptible	Susceptible		Potential Low-Level Resistance		Susceptible		Potential Low-Level Resistance	Susceptible	Low-Level Resistance	Potential Low-Level Resistance		Low-Level Resistance	Susceptible GSS 1.5		Susceptible GSS 1.5		Susceptible GSS 1.5		Susceptible GSS 1.5	Susceptible GSS 1.5	Susceptible GSS 1	Susceptible GSS 1.5		Susceptible GSS 1.5
xab_1 187161_E35E_M36I_N37S_R41K_I62L_L63L_A71A_N83D_C95C	Susceptible	Susceptible	Susceptible	Susceptible	Susceptible			Susceptible		Susceptible	Susceptible	Susceptible	Susceptible		Susceptible		Susceptible	Susceptible	Susceptible	Susceptible	Susceptible	Susceptible		Susceptible	Susceptible		Potential Low-Level Resistance		Susceptible		Potential Low-Level Resistance	Susceptible	Low-Level Resistance	Potential Low-Level Resistance		Low-Level Resistance	Susceptible GSS 1.5		Susceptible GSS 1.5		Susceptible GSS 1.5		Susceptible GSS 1.5	Susceptible GSS 1.5	Susceptible GSS 1	Susceptible GSS 1.5		Susceptible GSS 1.5
xab_2 187161_E35E_M36I_N37S_R41K_I62L_L63L_A71A_N83D_C95R	Susceptible	Susceptible	Susceptible	Susceptible	Susceptible			Susceptible		Susceptible	Susceptible	Susceptible	Susceptible		Susceptible		Susceptible	Susceptible	Susceptible	Susceptible	Susceptible	Susceptible		Susceptible	Susceptible		Potential Low-Level Resistance		Susceptible		Potential Low-Level Resistance	Susceptible	Low-Level Resistance	Potential Low-Level Resistance		Low-Level Resistance	Susceptible GSS 1.5		Susceptible GSS 1.5		Susceptible GSS 1.5		Susceptible GSS 1.5	Susceptible GSS 1.5	Susceptible GSS 1	Susceptible GSS 1.5		Susceptible GSS 1.5
xab_3 187161_E35E_M36I_N37S_R41K_I62L_L63L_A71A_N83N_C95R	Susceptible	Susceptible	Susceptible	Susceptible	Susceptible			Susceptible		Susceptible	Susceptible	Susceptible	Susceptible		Susceptible		Susceptible	Susceptible	Susceptible	Susceptible	Susceptible	Susceptible		Susceptible	Susceptible		Susceptible		Susceptible		Susceptible	Susceptible	Susceptible	Susceptible		Susceptible	Susceptible GSS 1.5		Susceptible GSS 1.5		Susceptible GSS 1.5		Susceptible GSS 1.5	Susceptible GSS 1.5	Susceptible GSS 1	Susceptible GSS 1.5		Susceptible GSS 1.5
xab_4 187161_E35E_M36I_N37S_R41R_I62I_L63L_A71A_N83D_C95C	Susceptible	Susceptible	Susceptible	Susceptible	Susceptible			Susceptible		Susceptible	Susceptible	Susceptible	Susceptible		Susceptible		Susceptible	Susceptible	Susceptible	Susceptible	Susceptible	Susceptible		Susceptible	Susceptible		Potential Low-Level Resistance		Susceptible		Potential Low-Level Resistance	Susceptible	Low-Level Resistance	Potential Low-Level Resistance		Low-Level Resistance	Susceptible GSS 1.5		Susceptible GSS 1.5		Susceptible GSS 1.5		Susceptible GSS 1.5	Susceptible GSS 1.5	Susceptible GSS 1	Susceptible GSS 1.5		Susceptible GSS 1.5
xab_5 187161_E35E_M36I_N37S_R41R_I62I_L63L_A71A_N83D_C95R	Susceptible	Susceptible	Susceptible	Susceptible	Susceptible			Susceptible		Susceptible	Susceptible	Susceptible	Susceptible		Susceptible		Susceptible	Susceptible	Susceptible	Susceptible	Susceptible	Susceptible		Susceptible	Susceptible		Potential Low-Level Resistance		Susceptible		Potential Low-Level Resistance	Susceptible	Low-Level Resistance	Potential Low-Level Resistance		Low-Level Resistance	Susceptible GSS 1.5		Susceptible GSS 1.5		Susceptible GSS 1.5		Susceptible GSS 1.5	Susceptible GSS 1.5	Susceptible GSS 1	Susceptible GSS 1.5		Susceptible GSS 1.5
xab_6 187161_E35E_M36I_N37S_R41R_I62I_L63L_A71A_N83N_C95C	Susceptible	Susceptible	Susceptible	Susceptible	Susceptible			Susceptible		Susceptible	Susceptible	Susceptible	Susceptible		Susceptible		Susceptible	Susceptible	Susceptible	Susceptible	Susceptible	Susceptible		Susceptible	Susceptible		Susceptible		Susceptible		Susceptible	Susceptible	Susceptible	Susceptible		Susceptible	Susceptible GSS 1.5		Susceptible GSS 1.5		Susceptible GSS 1.5		Susceptible GSS 1.5	Susceptible GSS 1.5	Susceptible GSS 1	Susceptible GSS 1.5		Susceptible GSS 1.5
xab_7 187161_E35E_M36I_N37S_R41R_I62I_L63L_A71A_N83N_C95R	Susceptible	Susceptible	Susceptible	Susceptible	Susceptible			Susceptible		Susceptible	Susceptible	Susceptible	Susceptible		Susceptible		Susceptible	Susceptible	Susceptible	Susceptible	Susceptible	Susceptible		Susceptible	Susceptible		Susceptible		Susceptible		Susceptible	Susceptible	Susceptible	Susceptible		Susceptible	Susceptible GSS 1.5		Susceptible GSS 1.5		Susceptible GSS 1.5		Susceptible GSS 1.5	Susceptible GSS 1.5	Susceptible GSS 1	Susceptible GSS 1.5		Susceptible GSS 1.5
xab_8 187161_E35E_M36I_N37S_R41R_I62I_L63L_A71V_N83D_C95C	Susceptible	Susceptible	Susceptible	Susceptible	Susceptible			Susceptible		Susceptible	Susceptible	Susceptible	Susceptible		Susceptible		Susceptible	Susceptible	Susceptible	Susceptible	Susceptible	Susceptible		Susceptible	Susceptible		Potential Low-Level Resistance		Susceptible		Potential Low-Level Resistance	Susceptible	Low-Level Resistance	Potential Low-Level Resistance		Low-Level Resistance	Susceptible GSS 1.5		Susceptible GSS 1.5		Susceptible GSS 1.5		Susceptible GSS 1.5	Susceptible GSS 1.5	Susceptible GSS 1	Susceptible GSS 1.5		Susceptible GSS 1.5
xab_9 187161_E35E_M36I_N37S_R41R_I62I_L63L_A71V_N83D_C95R	Susceptible	Susceptible	Susceptible	Susceptible	Susceptible			Susceptible		Susceptible	Susceptible	Susceptible	Susceptible		Susceptible		Susceptible	Susceptible	Susceptible	Susceptible	Susceptible	Susceptible		Susceptible	Susceptible		Potential Low-Level Resistance		Susceptible		Potential Low-Level Resistance	Susceptible	Low-Level Resistance	Potential Low-Level Resistance		Low-Level Resistance	Susceptible GSS 1.5		Susceptible GSS 1.5		Susceptible GSS 1.5		Susceptible GSS 1.5	Susceptible GSS 1.5	Susceptible GSS 1	Susceptible GSS 1.5		Susceptible GSS 1.5
xab_10 187161_E35E_M36I_N37S_R41R_I62I_L63L_A71V_N83N_C95C	Susceptible	Susceptible	Susceptible	Susceptible	Susceptible			Susceptible		Susceptible	Susceptible	Susceptible	Susceptible		Susceptible		Susceptible	Susceptible	Susceptible	Susceptible	Susceptible	Susceptible		Susceptible	Susceptible		Susceptible		Susceptible		Susceptible	Susceptible	Susceptible	Susceptible		Susceptible	Susceptible GSS 1.5		Susceptible GSS 1.5		Susceptible GSS 1.5		Susceptible GSS 1.5	Susceptible GSS 1.5	Susceptible GSS 1	Susceptible GSS 1.5		Susceptible GSS 1.5
xab_11 187161_E35E_M36I_N37S_R41R_I62I_L63L_A71V_N83N_C95R	Susceptible	Susceptible	Susceptible	Susceptible	Susceptible			Susceptible		Susceptible	Susceptible	Susceptible	Susceptible		Susceptible		Susceptible	Susceptible	Susceptible	Susceptible	Susceptible	Susceptible		Susceptible	Susceptible		Susceptible		Susceptible		Susceptible	Susceptible	Susceptible	Susceptible		Susceptible	Susceptible GSS 1.5		Susceptible GSS 1.5		Susceptible GSS 1.5		Susceptible GSS 1.5	Susceptible GSS 1.5	Susceptible GSS 1	Susceptible GSS 1.5		Susceptible GSS 1.5
xab_12 187161_E35E_M36I_N37S_R41R_I62I_L63P_A71A_N83D_C95C	Susceptible	Susceptible	Susceptible	Susceptible	Susceptible			Susceptible		Susceptible	Susceptible	Susceptible	Susceptible		Susceptible		Susceptible	Susceptible	Susceptible	Susceptible	Susceptible	Susceptible		Susceptible	Susceptible		Potential Low-Level Resistance		Susceptible		Potential Low-Level Resistance	Susceptible	Low-Level Resistance	Potential Low-Level Resistance		Low-Level Resistance	Susceptible GSS 1.5		Susceptible GSS 1.5		Susceptible GSS 1.5		Susceptible GSS 1.5	Susceptible GSS 1.5	Susceptible GSS 1	Susceptible GSS 1.5		Susceptible GSS 1.5
xab_13 187161_E35E_M36I_N37S_R41R_I62I_L63P_A71A_N83D_C95R	Susceptible	Susceptible	Susceptible	Susceptible	Susceptible			Susceptible		Susceptible	Susceptible	Susceptible	Susceptible		Susceptible		Susceptible	Susceptible	Susceptible	Susceptible	Susceptible	Susceptible		Susceptible	Susceptible		Potential Low-Level Resistance		Susceptible		Potential Low-Level Resistance	Susceptible	Low-Level Resistance	Potential Low-Level Resistance		Low-Level Resistance	Susceptible GSS 1.5		Susceptible GSS 1.5		Susceptible GSS 1.5		Susceptible GSS 1.5	Susceptible GSS 1.5	Susceptible GSS 1	Susceptible GSS 1.5		Susceptible GSS 1.5
xab_14 187161_E35E_M36I_N37S_R41R_I62I_L63P_A71A_N83N_C95C	Susceptible	Susceptible	Susceptible	Susceptible	Susceptible			Susceptible		Susceptible	Susceptible	Susceptible	Susceptible		Susceptible		Susceptible	Susceptible	Susceptible	Susceptible	Susceptible	Susceptible		Susceptible	Susceptible		Susceptible		Susceptible		Susceptible	Susceptible	Susceptible	Susceptible		Susceptible	Susceptible GSS 1.5		Susceptible GSS 1.5		Susceptible GSS 1.5		Susceptible GSS 1.5	Susceptible GSS 1.5	Susceptible GSS 1	Susceptible GSS 1.5		Susceptible GSS 1.5
xab_15 187161_E35E_M36I_N37S_R41R_I62I_L63P_A71A_N83N_C95R	Susceptible	Susceptible	Susceptible	Susceptible	Susceptible			Susceptible		Susceptible	Susceptible	Susceptible	Susceptible		Susceptible		Susceptible	Susceptible	Susceptible	Susceptible	Susceptible	Susceptible		Susceptible	Susceptible		Susceptible		Susceptible		Susceptible	Susceptible	Susceptible	Susceptible		Susceptible	Susceptible GSS 1.5		Susceptible GSS 1.5		Susceptible GSS 1.5		Susceptible GSS 1.5	Susceptible GSS 1.5	Susceptible GSS 1	Susceptible GSS 1.5		Susceptible GSS 1.5
xab_16 187161_E35E_M36I_N37S_R41R_I62L_L63L_A71A_N83D_C95C	Susceptible	Susceptible	Susceptible	Susceptible	Susceptible			Susceptible		Susceptible	Susceptible	Susceptible	Susceptible		Susceptible		Susceptible	Susceptible	Susceptible	Susceptible	Susceptible	Susceptible		Susceptible	Susceptible		Potential Low-Level Resistance		Susceptible		Potential Low-Level Resistance	Susceptible	Low-Level Resistance	Potential Low-Level Resistance		Low-Level Resistance	Susceptible GSS 1.5		Susceptible GSS 1.5		Susceptible GSS 1.5		Susceptible GSS 1.5	Susceptible GSS 1.5	Susceptible GSS 1	Susceptible GSS 1.5		Susceptible GSS 1.5
xab_17 187161_E35E_M36I_N37S_R41R_I62L_L63L_A71A_N83D_C95R	Susceptible	Susceptible	Susceptible	Susceptible	Susceptible			Susceptible		Susceptible	Susceptible	Susceptible	Susceptible		Susceptible		Susceptible	Susceptible	Susceptible	Susceptible	Susceptible	Susceptible		Susceptible	Susceptible		Potential Low-Level Resistance		Susceptible		Potential Low-Level Resistance	Susceptible	Low-Level Resistance	Potential Low-Level Resistance		Low-Level Resistance	Susceptible GSS 1.5		Susceptible GSS 1.5		Susceptible GSS 1.5		Susceptible GSS 1.5	Susceptible GSS 1.5	Susceptible GSS 1	Susceptible GSS 1.5		Susceptible GSS 1.5
xab_18 187161_E35E_M36I_N37S_R41R_I62L_L63L_A71A_N83N_C95C	Susceptible	Susceptible	Susceptible	Susceptible	Susceptible			Susceptible		Susceptible	Susceptible	Susceptible	Susceptible		Susceptible		Susceptible	Susceptible	Susceptible	Susceptible	Susceptible	Susceptible		Susceptible	Susceptible		Susceptible		Susceptible		Susceptible	Susceptible	Susceptible	Susceptible		Susceptible	Susceptible GSS 1.5		Susceptible GSS 1.5		Susceptible GSS 1.5		Susceptible GSS 1.5	Susceptible GSS 1.5	Susceptible GSS 1	Susceptible GSS 1.5		Susceptible GSS 1.5
xab_19 187161_E35E_M36I_N37S_R41R_I62L_L63L_A71A_N83N_C95R	Susceptible	Susceptible	Susceptible	Susceptible	Susceptible			Susceptible		Susceptible	Susceptible	Susceptible	Susceptible		Susceptible		Susceptible	Susceptible	Susceptible	Susceptible	Susceptible	Susceptible		Susceptible	Susceptible		Susceptible		Susceptible		Susceptible	Susceptible	Susceptible	Susceptible		Susceptible	Susceptible GSS 1.5		Susceptible GSS 1.5		Susceptible GSS 1.5		Susceptible GSS 1.5	Susceptible GSS 1.5	Susceptible GSS 1	Susceptible GSS 1.5		Susceptible GSS 1.5
xab_20 187161_E35E_M36I_N37S_R41R_I62L_L63L_A71V_N83D_C95R	Susceptible	Susceptible	Susceptible	Susceptible	Susceptible			Susceptible		Susceptible	Susceptible	Susceptible	Susceptible		Susceptible		Susceptible	Susceptible	Susceptible	Susceptible	Susceptible	Susceptible		Susceptible	Susceptible		Potential Low-Level Resistance		Susceptible		Potential Low-Level Resistance	Susceptible	Low-Level Resistance	Potential Low-Level Resistance		Low-Level Resistance	Susceptible GSS 1.5		Susceptible GSS 1.5		Susceptible GSS 1.5		Susceptible GSS 1.5	Susceptible GSS 1.5	Susceptible GSS 1	Susceptible GSS 1.5		Susceptible GSS 1.5
xab_21 187161_E35E_M36I_N37S_R41R_I62L_L63L_A71V_N83N_C95R	Susceptible	Susceptible	Susceptible	Susceptible	Susceptible			Susceptible		Susceptible	Susceptible	Susceptible	Susceptible		Susceptible		Susceptible	Susceptible	Susceptible	Susceptible	Susceptible	Susceptible		Susceptible	Susceptible		Susceptible		Susceptible		Susceptible	Susceptible	Susceptible	Susceptible		Susceptible	Susceptible GSS 1.5		Susceptible GSS 1.5		Susceptible GSS 1.5		Susceptible GSS 1.5	Susceptible GSS 1.5	Susceptible GSS 1	Susceptible GSS 1.5		Susceptible GSS 1.5
xab_22 187161_E35E_M36I_N37S_R41R_I62L_L63P_A71A_N83D_C95C	Susceptible	Susceptible	Susceptible	Susceptible	Susceptible			Susceptible		Susceptible	Susceptible	Susceptible	Susceptible		Susceptible		Susceptible	Susceptible	Susceptible	Susceptible	Susceptible	Susceptible		Susceptible	Susceptible		Potential Low-Level Resistance		Susceptible		Potential Low-Level Resistance	Susceptible	Low-Level Resistance	Potential Low-Level Resistance		Low-Level Resistance	Susceptible GSS 1.5		Susceptible GSS 1.5		Susceptible GSS 1.5		Susceptible GSS 1.5	Susceptible GSS 1.5	Susceptible GSS 1	Susceptible GSS 1.5		Susceptible GSS 1.5
xab_23 187161_E35E_M36I_N37S_R41R_I62L_L63P_A71A_N83D_C95R	Susceptible	Susceptible	Susceptible	Susceptible	Susceptible			Susceptible		Susceptible	Susceptible	Susceptible	Susceptible		Susceptible		Susceptible	Susceptible	Susceptible	Susceptible	Susceptible	Susceptible		Susceptible	Susceptible		Potential Low-Level Resistance		Susceptible		Potential Low-Level Resistance	Susceptible	Low-Level Resistance	Potential Low-Level Resistance		Low-Level Resistance	Susceptible GSS 1.5		Susceptible GSS 1.5		Susceptible GSS 1.5		Susceptible GSS 1.5	Susceptible GSS 1.5	Susceptible GSS 1	Susceptible GSS 1.5		Susceptible GSS 1.5
xab_24 187161_E35E_M36I_N37S_R41R_I62L_L63P_A71A_N83N_C95C	Susceptible	Susceptible	Susceptible	Susceptible	Susceptible			Susceptible		Susceptible	Susceptible	Susceptible	Susceptible		Susceptible		Susceptible	Susceptible	Susceptible	Susceptible	Susceptible	Susceptible		Susceptible	Susceptible		Susceptible		Susceptible		Susceptible	Susceptible	Susceptible	Susceptible		Susceptible	Susceptible GSS 1.5		Susceptible GSS 1.5		Susceptible GSS 1.5		Susceptible GSS 1.5	Susceptible GSS 1.5	Susceptible GSS 1	Susceptible GSS 1.5		Susceptible GSS 1.5
xab_25 187161_E35E_M36I_N37S_R41R_I62L_L63P_A71A_N83N_C95R	Susceptible	Susceptible	Susceptible	Susceptible	Susceptible			Susceptible		Susceptible	Susceptible	Susceptible	Susceptible		Susceptible		Susceptible	Susceptible	Susceptible	Susceptible	Susceptible	Susceptible		Susceptible	Susceptible		Susceptible		Susceptible		Susceptible	Susceptible	Susceptible	Susceptible		Susceptible	Susceptible GSS 1.5		Susceptible GSS 1.5		Susceptible GSS 1.5		Susceptible GSS 1.5	Susceptible GSS 1.5	Susceptible GSS 1	Susceptible GSS 1.5		Susceptible GSS 1.5
xab_26 187161_E35E_M36I_N37S_R41R_I62L_L63P_A71V_N83D_C95C	Susceptible	Susceptible	Susceptible	Susceptible	Susceptible			Susceptible		Susceptible	Susceptible	Susceptible	Susceptible		Susceptible		Susceptible	Susceptible	Susceptible	Susceptible	Susceptible	Susceptible		Susceptible	Susceptible		Potential Low-Level Resistance		Susceptible		Potential Low-Level Resistance	Susceptible	Low-Level Resistance	Potential Low-Level Resistance		Low-Level Resistance	Susceptible GSS 1.5		Susceptible GSS 1.5		Susceptible GSS 1.5		Susceptible GSS 1.5	Susceptible GSS 1.5	Susceptible GSS 1	Susceptible GSS 1.5		Susceptible GSS 1.5
xab_27 187161_E35E_M36I_N37S_R41R_I62L_L63P_A71V_N83D_C95R	Susceptible	Susceptible	Susceptible	Susceptible	Susceptible			Susceptible		Susceptible	Susceptible	Susceptible	Susceptible		Susceptible		Susceptible	Susceptible	Susceptible	Susceptible	Susceptible	Susceptible		Susceptible	Susceptible		Potential Low-Level Resistance		Susceptible		Potential Low-Level Resistance	Susceptible	Low-Level Resistance	Potential Low-Level Resistance		Low-Level Resistance	Susceptible GSS 1.5		Susceptible GSS 1.5		Susceptible GSS 1.5		Susceptible GSS 1.5	Susceptible GSS 1.5	Susceptible GSS 1	Susceptible GSS 1.5		Susceptible GSS 1.5
xab_28 187161_E35E_M36I_N37S_R41R_I62L_L63P_A71V_N83N_C95C	Susceptible	Susceptible	Susceptible	Susceptible	Susceptible			Susceptible		Susceptible	Susceptible	Susceptible	Susceptible		Susceptible		Susceptible	Susceptible	Susceptible	Susceptible	Susceptible	Susceptible		Susceptible	Susceptible		Susceptible		Susceptible		Susceptible	Susceptible	Susceptible	Susceptible		Susceptible	Susceptible GSS 1.5		Susceptible GSS 1.5		Susceptible GSS 1.5		Susceptible GSS 1.5	Susceptible GSS 1.5	Susceptible GSS 1	Susceptible GSS 1.5		Susceptible GSS 1.5
xab_29 187161_E35E_M36I_N37S_R41R_I62L_L63P_A71V_N83N_C95R	Susceptible	Susceptible	Susceptible	Susceptible	Susceptible			Susceptible		Susceptible	Susceptible	Susceptible	Susceptible		Susceptible		Susceptible	Susceptible	Susceptible	Susceptible	Susceptible	Susceptible		Susceptible	Susceptible		Susceptible		Susceptible		Susceptible	Susceptible	Susceptible	Susceptible		Susceptible	Susceptible GSS 1.5		Susceptible GSS 1.5		Susceptible GSS 1.5		Susceptible GSS 1.5	Susceptible GSS 1.5	Susceptible GSS 1	Susceptible GSS 1.5		Susceptible GSS 1.5
xab_30 187161_E35E_M36I_N37Y_R41K_I62I_L63L_A71A_N83D_C95R	Susceptible	Susceptible	Susceptible	Susceptible	Susceptible			Susceptible		Susceptible	Susceptible	Susceptible	Susceptible		Susceptible		Susceptible	Susceptible	Susceptible	Susceptible	Susceptible	Susceptible		Susceptible	Susceptible		Potential Low-Level Resistance		Susceptible		Potential Low-Level Resistance	Susceptible	Low-Level Resistance	Potential Low-Level Resistance		Low-Level Resistance	Susceptible GSS 1.5		Susceptible GSS 1.5		Susceptible GSS 1.5		Susceptible GSS 1.5	Susceptible GSS 1.5	Susceptible GSS 1	Susceptible GSS 1.5		Susceptible GSS 1.5
xab_31 187161_E35E_M36I_N37Y_R41K_I62L_L63L_A71A_N83N_C95R	Susceptible	Susceptible	Susceptible	Susceptible	Susceptible			Susceptible		Susceptible	Susceptible	Susceptible	Susceptible		Susceptible		Susceptible	Susceptible	Susceptible	Susceptible	Susceptible	Susceptible		Susceptible	Susceptible		Susceptible		Susceptible		Susceptible	Susceptible	Susceptible	Susceptible		Susceptible	Susceptible GSS 1.5		Susceptible GSS 1.5		Susceptible GSS 1.5		Susceptible GSS 1.5	Susceptible GSS 1.5	Susceptible GSS 1	Susceptible GSS 1.5		Susceptible GSS 1.5
xab_32 187161_E35E_M36I_N37Y_R41K_I62L_L63P_A71A_N83N_C95R	Susceptible	Susceptible	Susceptible	Susceptible	Susceptible			Susceptible		Susceptible	Susceptible	Susceptible	Susceptible		Susceptible		Susceptible	Susceptible	Susceptible	Susceptible	Susceptible	Susceptible		Susceptible	Susceptible		Susceptible		Susceptible		Susceptible	Susceptible	Susceptible	Susceptible		Susceptible	Susceptible GSS 1.5		Susceptible GSS 1.5		Susceptible GSS 1.5		Susceptible GSS 1.5	Susceptible GSS 1.5	Susceptible GSS 1	Susceptible GSS 1.5		Susceptible GSS 1.5
xab_33 187161_E35E_M36I_N37Y_R41R_I62I_L63L_A71A_N83D_C95C	Susceptible	Susceptible	Susceptible	Susceptible	Susceptible			Susceptible		Susceptible	Susceptible	Susceptible	Susceptible		Susceptible		Susceptible	Susceptible	Susceptible	Susceptible	Susceptible	Susceptible		Susceptible	Susceptible		Potential Low-Level Resistance		Susceptible		Potential Low-Level Resistance	Susceptible	Low-Level Resistance	Potential Low-Level Resistance		Low-Level Resistance	Susceptible GSS 1.5		Susceptible GSS 1.5		Susceptible GSS 1.5		Susceptible GSS 1.5	Susceptible GSS 1.5	Susceptible GSS 1	Susceptible GSS 1.5		Susceptible GSS 1.5
xab_34 187161_E35E_M36I_N37Y_R41R_I62I_L63L_A71A_N83D_C95R	Susceptible	Susceptible	Susceptible	Susceptible	Susceptible			Susceptible		Susceptible	Susceptible	Susceptible	Susceptible		Susceptible		Susceptible	Susceptible	Susceptible	Susceptible	Susceptible	Susceptible		Susceptible	Susceptible		Potential Low-Level Resistance		Susceptible		Potential Low-Level Resistance	Susceptible	Low-Level Resistance	Potential Low-Level Resistance		Low-Level Resistance	Susceptible GSS 1.5		Susceptible GSS 1.5		Susceptible GSS 1.5		Susceptible GSS 1.5	Susceptible GSS 1.5	Susceptible GSS 1	Susceptible GSS 1.5		Susceptible GSS 1.5
xab_35 187161_E35E_M36I_N37Y_R41R_I62I_L63L_A71A_N83N_C95C	Susceptible	Susceptible	Susceptible	Susceptible	Susceptible			Susceptible		Susceptible	Susceptible	Susceptible	Susceptible		Susceptible		Susceptible	Susceptible	Susceptible	Susceptible	Susceptible	Susceptible		Susceptible	Susceptible		Susceptible		Susceptible		Susceptible	Susceptible	Susceptible	Susceptible		Susceptible	Susceptible GSS 1.5		Susceptible GSS 1.5		Susceptible GSS 1.5		Susceptible GSS 1.5	Susceptible GSS 1.5	Susceptible GSS 1	Susceptible GSS 1.5		Susceptible GSS 1.5
xab_36 187161_E35E_M36I_N37Y_R41R_I62I_L63L_A71A_N83N_C95R	Susceptible	Susceptible	Susceptible	Susceptible	Susceptible			Susceptible		Susceptible	Susceptible	Susceptible	Susceptible		Susceptible		Susceptible	Susceptible	Susceptible	Susceptible	Susceptible	Susceptible		Susceptible	Susceptible		Susceptible		Susceptible		Susceptible	Susceptible	Susceptible	Susceptible		Susceptible	Susceptible GSS 1.5		Susceptible GSS 1.5		Susceptible GSS 1.5		Susceptible GSS 1.5	Susceptible GSS 1.5	Susceptible GSS 1	Susceptible GSS 1.5		Susceptible GSS 1.5
xab_37 187161_E35E_M36I_N37Y_R41R_I62I_L63L_A71V_N83D_C95R	Susceptible	Susceptible	Susceptible	Susceptible	Susceptible			Susceptible		Susceptible	Susceptible	Susceptible	Susceptible		Susceptible		Susceptible	Susceptible	Susceptible	Susceptible	Susceptible	Susceptible		Susceptible	Susceptible		Potential Low-Level Resistance		Susceptible		Potential Low-Level Resistance	Susceptible	Low-Level Resistance	Potential Low-Level Resistance		Low-Level Resistance	Susceptible GSS 1.5		Susceptible GSS 1.5		Susceptible GSS 1.5		Susceptible GSS 1.5	Susceptible GSS 1.5	Susceptible GSS 1	Susceptible GSS 1.5		Susceptible GSS 1.5
xab_38 187161_E35E_M36I_N37Y_R41R_I62I_L63P_A71A_N83D_C95C	Susceptible	Susceptible	Susceptible	Susceptible	Susceptible			Susceptible		Susceptible	Susceptible	Susceptible	Susceptible		Susceptible		Susceptible	Susceptible	Susceptible	Susceptible	Susceptible	Susceptible		Susceptible	Susceptible		Potential Low-Level Resistance		Susceptible		Potential Low-Level Resistance	Susceptible	Low-Level Resistance	Potential Low-Level Resistance		Low-Level Resistance	Susceptible GSS 1.5		Susceptible GSS 1.5		Susceptible GSS 1.5		Susceptible GSS 1.5	Susceptible GSS 1.5	Susceptible GSS 1	Susceptible GSS 1.5		Susceptible GSS 1.5
xab_39 187161_E35E_M36I_N37Y_R41R_I62I_L63P_A71A_N83D_C95R	Susceptible	Susceptible	Susceptible	Susceptible	Susceptible			Susceptible		Susceptible	Susceptible	Susceptible	Susceptible		Susceptible		Susceptible	Susceptible	Susceptible	Susceptible	Susceptible	Susceptible		Susceptible	Susceptible		Potential Low-Level Resistance		Susceptible		Potential Low-Level Resistance	Susceptible	Low-Level Resistance	Potential Low-Level Resistance		Low-Level Resistance	Susceptible GSS 1.5		Susceptible GSS 1.5		Susceptible GSS 1.5		Susceptible GSS 1.5	Susceptible GSS 1.5	Susceptible GSS 1	Susceptible GSS 1.5		Susceptible GSS 1.5
xab_40 187161_E35E_M36I_N37Y_R41R_I62I_L63P_A71A_N83N_C95C	Susceptible	Susceptible	Susceptible	Susceptible	Susceptible			Susceptible		Susceptible	Susceptible	Susceptible	Susceptible		Susceptible		Susceptible	Susceptible	Susceptible	Susceptible	Susceptible	Susceptible		Susceptible	Susceptible		Susceptible		Susceptible		Susceptible	Susceptible	Susceptible	Susceptible		Susceptible	Susceptible GSS 1.5		Susceptible GSS 1.5		Susceptible GSS 1.5		Susceptible GSS 1.5	Susceptible GSS 1.5	Susceptible GSS 1	Susceptible GSS 1.5		Susceptible GSS 1.5
xab_41 187161_E35E_M36I_N37Y_R41R_I62I_L63P_A71A_N83N_C95R	Susceptible	Susceptible	Susceptible	Susceptible	Susceptible			Susceptible		Susceptible	Susceptible	Susceptible	Susceptible		Susceptible		Susceptible	Susceptible	Susceptible	Susceptible	Susceptible	Susceptible		Susceptible	Susceptible		Susceptible		Susceptible		Susceptible	Susceptible	Susceptible	Susceptible		Susceptible	Susceptible GSS 1.5		Susceptible GSS 1.5		Susceptible GSS 1.5		Susceptible GSS 1.5	Susceptible GSS 1.5	Susceptible GSS 1	Susceptible GSS 1.5		Susceptible GSS 1.5
xab_42 187161_E35E_M36I_N37Y_R41R_I62L_L63L_A71A_N83D_C95C	Susceptible	Susceptible	Susceptible	Susceptible	Susceptible			Susceptible		Susceptible	Susceptible	Susceptible	Susceptible		Susceptible		Susceptible	Susceptible	Susceptible	Susceptible	Susceptible	Susceptible		Susceptible	Susceptible		Potential Low-Level Resistance		Susceptible		Potential Low-Level Resistance	Susceptible	Low-Level Resistance	Potential Low-Level Resistance		Low-Level Resistance	Susceptible GSS 1.5		Susceptible GSS 1.5		Susceptible GSS 1.5		Susceptible GSS 1.5	Susceptible GSS 1.5	Susceptible GSS 1	Susceptible GSS 1.5		Susceptible GSS 1.5
xab_43 187161_E35E_M36I_N37Y_R41R_I62L_L63L_A71A_N83D_C95R	Susceptible	Susceptible	Susceptible	Susceptible	Susceptible			Susceptible		Susceptible	Susceptible	Susceptible	Susceptible		Susceptible		Susceptible	Susceptible	Susceptible	Susceptible	Susceptible	Susceptible		Susceptible	Susceptible		Potential Low-Level Resistance		Susceptible		Potential Low-Level Resistance	Susceptible	Low-Level Resistance	Potential Low-Level Resistance		Low-Level Resistance	Susceptible GSS 1.5		Susceptible GSS 1.5		Susceptible GSS 1.5		Susceptible GSS 1.5	Susceptible GSS 1.5	Susceptible GSS 1	Susceptible GSS 1.5		Susceptible GSS 1.5
xab_44 187161_E35E_M36I_N37Y_R41R_I62L_L63L_A71A_N83N_C95C	Susceptible	Susceptible	Susceptible	Susceptible	Susceptible			Susceptible		Susceptible	Susceptible	Susceptible	Susceptible		Susceptible		Susceptible	Susceptible	Susceptible	Susceptible	Susceptible	Susceptible		Susceptible	Susceptible		Susceptible		Susceptible		Susceptible	Susceptible	Susceptible	Susceptible		Susceptible	Susceptible GSS 1.5		Susceptible GSS 1.5		Susceptible GSS 1.5		Susceptible GSS 1.5	Susceptible GSS 1.5	Susceptible GSS 1	Susceptible GSS 1.5		Susceptible GSS 1.5
xab_45 187161_E35E_M36I_N37Y_R41R_I62L_L63L_A71A_N83N_C95R	Susceptible	Susceptible	Susceptible	Susceptible	Susceptible			Susceptible		Susceptible	Susceptible	Susceptible	Susceptible		Susceptible		Susceptible	Susceptible	Susceptible	Susceptible	Susceptible	Susceptible		Susceptible	Susceptible		Susceptible		Susceptible		Susceptible	Susceptible	Susceptible	Susceptible		Susceptible	Susceptible GSS 1.5		Susceptible GSS 1.5		Susceptible GSS 1.5		Susceptible GSS 1.5	Susceptible GSS 1.5	Susceptible GSS 1	Susceptible GSS 1.5		Susceptible GSS 1.5
xab_46 187161_E35E_M36I_N37Y_R41R_I62L_L63L_A71V_N83D_C95C	Susceptible	Susceptible	Susceptible	Susceptible	Susceptible			Susceptible		Susceptible	Susceptible	Susceptible	Susceptible		Susceptible		Susceptible	Susceptible	Susceptible	Susceptible	Susceptible	Susceptible		Susceptible	Susceptible		Potential Low-Level Resistance		Susceptible		Potential Low-Level Resistance	Susceptible	Low-Level Resistance	Potential Low-Level Resistance		Low-Level Resistance	Susceptible GSS 1.5		Susceptible GSS 1.5		Susceptible GSS 1.5		Susceptible GSS 1.5	Susceptible GSS 1.5	Susceptible GSS 1	Susceptible GSS 1.5		Susceptible GSS 1.5
xab_47 187161_E35E_M36I_N37Y_R41R_I62L_L63L_A71V_N83N_C95C	Susceptible	Susceptible	Susceptible	Susceptible	Susceptible			Susceptible		Susceptible	Susceptible	Susceptible	Susceptible		Susceptible		Susceptible	Susceptible	Susceptible	Susceptible	Susceptible	Susceptible		Susceptible	Susceptible		Susceptible		Susceptible		Susceptible	Susceptible	Susceptible	Susceptible		Susceptible	Susceptible GSS 1.5		Susceptible GSS 1.5		Susceptible GSS 1.5		Susceptible GSS 1.5	Susceptible GSS 1.5	Susceptible GSS 1	Susceptible GSS 1.5		Susceptible GSS 1.5
xab_48 187161_E35E_M36I_N37Y_R41R_I62L_L63L_A71V_N83N_C95R	Susceptible	Susceptible	Susceptible	Susceptible	Susceptible			Susceptible		Susceptible	Susceptible	Susceptible	Susceptible		Susceptible		Susceptible	Susceptible	Susceptible	Susceptible	Susceptible	Susceptible		Susceptible	Susceptible		Susceptible		Susceptible		Susceptible	Susceptible	Susceptible	Susceptible		Susceptible	Susceptible GSS 1.5		Susceptible GSS 1.5		Susceptible GSS 1.5		Susceptible GSS 1.5	Susceptible GSS 1.5	Susceptible GSS 1	Susceptible GSS 1.5		Susceptible GSS 1.5
xab_49 187161_E35E_M36I_N37Y_R41R_I62L_L63P_A71A_N83D_C95C	Susceptible	Susceptible	Susceptible	Susceptible	Susceptible			Susceptible		Susceptible	Susceptible	Susceptible	Susceptible		Susceptible		Susceptible	Susceptible	Susceptible	Susceptible	Susceptible	Susceptible		Susceptible	Susceptible		Potential Low-Level Resistance		Susceptible		Potential Low-Level Resistance	Susceptible	Low-Level Resistance	Potential Low-Level Resistance		Low-Level Resistance	Susceptible GSS 1.5		Susceptible GSS 1.5		Susceptible GSS 1.5		Susceptible GSS 1.5	Susceptible GSS 1.5	Susceptible GSS 1	Susceptible GSS 1.5		Susceptible GSS 1.5
xab_50 187161_E35E_M36I_N37Y_R41R_I62L_L63P_A71A_N83D_C95R	Susceptible	Susceptible	Susceptible	Susceptible	Susceptible			Susceptible		Susceptible	Susceptible	Susceptible	Susceptible		Susceptible		Susceptible	Susceptible	Susceptible	Susceptible	Susceptible	Susceptible		Susceptible	Susceptible		Potential Low-Level Resistance		Susceptible		Potential Low-Level Resistance	Susceptible	Low-Level Resistance	Potential Low-Level Resistance		Low-Level Resistance	Susceptible GSS 1.5		Susceptible GSS 1.5		Susceptible GSS 1.5		Susceptible GSS 1.5	Susceptible GSS 1.5	Susceptible GSS 1	Susceptible GSS 1.5		Susceptible GSS 1.5
xab_51 187161_E35E_M36I_N37Y_R41R_I62L_L63P_A71A_N83N_C95C	Susceptible	Susceptible	Susceptible	Susceptible	Susceptible			Susceptible		Susceptible	Susceptible	Susceptible	Susceptible		Susceptible		Susceptible	Susceptible	Susceptible	Susceptible	Susceptible	Susceptible		Susceptible	Susceptible		Susceptible		Susceptible		Susceptible	Susceptible	Susceptible	Susceptible		Susceptible	Susceptible GSS 1.5		Susceptible GSS 1.5		Susceptible GSS 1.5		Susceptible GSS 1.5	Susceptible GSS 1.5	Susceptible GSS 1	Susceptible GSS 1.5		Susceptible GSS 1.5
xab_52 187161_E35E_M36I_N37Y_R41R_I62L_L63P_A71A_N83N_C95R	Susceptible	Susceptible	Susceptible	Susceptible	Susceptible			Susceptible		Susceptible	Susceptible	Susceptible	Susceptible		Susceptible		Susceptible	Susceptible	Susceptible	Susceptible	Susceptible	Susceptible		Susceptible	Susceptible		Susceptible		Susceptible		Susceptible	Susceptible	Susceptible	Susceptible		Susceptible	Susceptible GSS 1.5		Susceptible GSS 1.5		Susceptible GSS 1.5		Susceptible GSS 1.5	Susceptible GSS 1.5	Susceptible GSS 1	Susceptible GSS 1.5		Susceptible GSS 1.5
xab_53 187161_E35E_M36I_N37Y_R41R_I62L_L63P_A71V_N83D_C95C	Susceptible	Susceptible	Susceptible	Susceptible	Susceptible			Susceptible		Susceptible	Susceptible	Susceptible	Susceptible		Susceptible		Susceptible	Susceptible	Susceptible	Susceptible	Susceptible	Susceptible		Susceptible	Susceptible		Potential Low-Level Resistance		Susceptible		Potential Low-Level Resistance	Susceptible	Low-Level Resistance	Potential Low-Level Resistance		Low-Level Resistance	Susceptible GSS 1.5		Susceptible GSS 1.5		Susceptible GSS 1.5		Susceptible GSS 1.5	Susceptible GSS 1.5	Susceptible GSS 1	Susceptible GSS 1.5		Susceptible GSS 1.5
xab_54 187161_E35E_M36I_N37Y_R41R_I62L_L63P_A71V_N83D_C95R	Susceptible	Susceptible	Susceptible	Susceptible	Susceptible			Susceptible		Susceptible	Susceptible	Susceptible	Susceptible		Susceptible		Susceptible	Susceptible	Susceptible	Susceptible	Susceptible	Susceptible		Susceptible	Susceptible		Potential Low-Level Resistance		Susceptible		Potential Low-Level Resistance	Susceptible	Low-Level Resistance	Potential Low-Level Resistance		Low-Level Resistance	Susceptible GSS 1.5		Susceptible GSS 1.5		Susceptible GSS 1.5		Susceptible GSS 1.5	Susceptible GSS 1.5	Susceptible GSS 1	Susceptible GSS 1.5		Susceptible GSS 1.5
xab_55 187161_E35E_M36I_N37Y_R41R_I62L_L63P_A71V_N83N_C95C	Susceptible	Susceptible	Susceptible	Susceptible	Susceptible			Susceptible		Susceptible	Susceptible	Susceptible	Susceptible		Susceptible		Susceptible	Susceptible	Susceptible	Susceptible	Susceptible	Susceptible		Susceptible	Susceptible		Susceptible		Susceptible		Susceptible	Susceptible	Susceptible	Susceptible		Susceptible	Susceptible GSS 1.5		Susceptible GSS 1.5		Susceptible GSS 1.5		Susceptible GSS 1.5	Susceptible GSS 1.5	Susceptible GSS 1	Susceptible GSS 1.5		Susceptible GSS 1.5
xab_56 187161_E35E_M36I_N37Y_R41R_I62L_L63P_A71V_N83N_C95R	Susceptible	Susceptible	Susceptible	Susceptible	Susceptible			Susceptible		Susceptible	Susceptible	Susceptible	Susceptible		Susceptible		Susceptible	Susceptible	Susceptible	Susceptible	Susceptible	Susceptible		Susceptible	Susceptible		Susceptible		Susceptible		Susceptible	Susceptible	Susceptible	Susceptible		Susceptible	Susceptible GSS 1.5		Susceptible GSS 1.5		Susceptible GSS 1.5		Susceptible GSS 1.5	Susceptible GSS 1.5	Susceptible GSS 1	Susceptible GSS 1.5		Susceptible GSS 1.5
xab_57 187161_E35E_M36M_N37C_R41K_I62I_L63L_A71A_N83D_C95C	Susceptible	Susceptible	Susceptible	Susceptible	Susceptible			Susceptible		Susceptible	Susceptible	Susceptible	Susceptible		Susceptible		Susceptible	Susceptible	Susceptible	Susceptible	Susceptible	Susceptible		Susceptible	Susceptible		Potential Low-Level Resistance		Susceptible		Potential Low-Level Resistance	Susceptible	Low-Level Resistance	Potential Low-Level Resistance		Low-Level Resistance	Susceptible GSS 1.5		Susceptible GSS 1.5		Susceptible GSS 1.5		Susceptible GSS 1.5	Susceptible GSS 1.5	Susceptible GSS 1	Susceptible GSS 1.5		Susceptible GSS 1.5
xab_58 187161_E35E_M36M_N37C_R41K_I62I_L63L_A71A_N83D_C95R	Susceptible	Susceptible	Susceptible	Susceptible	Susceptible			Susceptible		Susceptible	Susceptible	Susceptible	Susceptible		Susceptible		Susceptible	Susceptible	Susceptible	Susceptible	Susceptible	Susceptible		Susceptible	Susceptible		Potential Low-Level Resistance		Susceptible		Potential Low-Level Resistance	Susceptible	Low-Level Resistance	Potential Low-Level Resistance		Low-Level Resistance	Susceptible GSS 1.5		Susceptible GSS 1.5		Susceptible GSS 1.5		Susceptible GSS 1.5	Susceptible GSS 1.5	Susceptible GSS 1	Susceptible GSS 1.5		Susceptible GSS 1.5
xab_59 187161_E35E_M36M_N37C_R41K_I62I_L63L_A71A_N83N_C95R	Susceptible	Susceptible	Susceptible	Susceptible	Susceptible			Susceptible		Susceptible	Susceptible	Susceptible	Susceptible		Susceptible		Susceptible	Susceptible	Susceptible	Susceptible	Susceptible	Susceptible		Susceptible	Susceptible		Susceptible		Susceptible		Susceptible	Susceptible	Susceptible	Susceptible		Susceptible	Susceptible GSS 1.5		Susceptible GSS 1.5		Susceptible GSS 1.5		Susceptible GSS 1.5	Susceptible GSS 1.5	Susceptible GSS 1	Susceptible GSS 1.5		Susceptible GSS 1.5
xab_60 187161_E35E_M36M_N37C_R41K_I62L_L63L_A71A_N83N_C95R	Susceptible	Susceptible	Susceptible	Susceptible	Susceptible			Susceptible		Susceptible	Susceptible	Susceptible	Susceptible		Susceptible		Susceptible	Susceptible	Susceptible	Susceptible	Susceptible	Susceptible		Susceptible	Susceptible		Susceptible		Susceptible		Susceptible	Susceptible	Susceptible	Susceptible		Susceptible	Susceptible GSS 1.5		Susceptible GSS 1.5		Susceptible GSS 1.5		Susceptible GSS 1.5	Susceptible GSS 1.5	Susceptible GSS 1	Susceptible GSS 1.5		Susceptible GSS 1.5
xab_61 187161_E35E_M36M_N37C_R41K_I62L_L63P_A71A_N83N_C95R	Susceptible	Susceptible	Susceptible	Susceptible	Susceptible			Susceptible		Susceptible	Susceptible	Susceptible	Susceptible		Susceptible		Susceptible	Susceptible	Susceptible	Susceptible	Susceptible	Susceptible		Susceptible	Susceptible		Susceptible		Susceptible		Susceptible	Susceptible	Susceptible	Susceptible		Susceptible	Susceptible GSS 1.5		Susceptible GSS 1.5		Susceptible GSS 1.5		Susceptible GSS 1.5	Susceptible GSS 1.5	Susceptible GSS 1	Susceptible GSS 1.5		Susceptible GSS 1.5
xab_62 187161_E35E_M36M_N37C_R41R_I62I_L63L_A71A_N83D_C95C	Susceptible	Susceptible	Susceptible	Susceptible	Susceptible			Susceptible		Susceptible	Susceptible	Susceptible	Susceptible		Susceptible		Susceptible	Susceptible	Susceptible	Susceptible	Susceptible	Susceptible		Susceptible	Susceptible		Potential Low-Level Resistance		Susceptible		Potential Low-Level Resistance	Susceptible	Low-Level Resistance	Potential Low-Level Resistance		Low-Level Resistance	Susceptible GSS 1.5		Susceptible GSS 1.5		Susceptible GSS 1.5		Susceptible GSS 1.5	Susceptible GSS 1.5	Susceptible GSS 1	Susceptible GSS 1.5		Susceptible GSS 1.5
xab_63 187161_E35E_M36M_N37C_R41R_I62I_L63L_A71A_N83D_C95R	Susceptible	Susceptible	Susceptible	Susceptible	Susceptible			Susceptible		Susceptible	Susceptible	Susceptible	Susceptible		Susceptible		Susceptible	Susceptible	Susceptible	Susceptible	Susceptible	Susceptible		Susceptible	Susceptible		Potential Low-Level Resistance		Susceptible		Potential Low-Level Resistance	Susceptible	Low-Level Resistance	Potential Low-Level Resistance		Low-Level Resistance	Susceptible GSS 1.5		Susceptible GSS 1.5		Susceptible GSS 1.5		Susceptible GSS 1.5	Susceptible GSS 1.5	Susceptible GSS 1	Susceptible GSS 1.5		Susceptible GSS 1.5
xab_64 187161_E35E_M36M_N37C_R41R_I62I_L63L_A71A_N83N_C95C	Susceptible	Susceptible	Susceptible	Susceptible	Susceptible			Susceptible		Susceptible	Susceptible	Susceptible	Susceptible		Susceptible		Susceptible	Susceptible	Susceptible	Susceptible	Susceptible	Susceptible		Susceptible	Susceptible		Susceptible		Susceptible		Susceptible	Susceptible	Susceptible	Susceptible		Susceptible	Susceptible GSS 1.5		Susceptible GSS 1.5		Susceptible GSS 1.5		Susceptible GSS 1.5	Susceptible GSS 1.5	Susceptible GSS 1	Susceptible GSS 1.5		Susceptible GSS 1.5
xab_65 187161_E35E_M36M_N37C_R41R_I62I_L63L_A71A_N83N_C95R	Susceptible	Susceptible	Susceptible	Susceptible	Susceptible			Susceptible		Susceptible	Susceptible	Susceptible	Susceptible		Susceptible		Susceptible	Susceptible	Susceptible	Susceptible	Susceptible	Susceptible		Susceptible	Susceptible		Susceptible		Susceptible		Susceptible	Susceptible	Susceptible	Susceptible		Susceptible	Susceptible GSS 1.5		Susceptible GSS 1.5		Susceptible GSS 1.5		Susceptible GSS 1.5	Susceptible GSS 1.5	Susceptible GSS 1	Susceptible GSS 1.5		Susceptible GSS 1.5
xab_66 187161_E35E_M36M_N37C_R41R_I62I_L63L_A71V_N83D_C95R	Susceptible	Susceptible	Susceptible	Susceptible	Susceptible			Susceptible		Susceptible	Susceptible	Susceptible	Susceptible		Susceptible		Susceptible	Susceptible	Susceptible	Susceptible	Susceptible	Susceptible		Susceptible	Susceptible		Potential Low-Level Resistance		Susceptible		Potential Low-Level Resistance	Susceptible	Low-Level Resistance	Potential Low-Level Resistance		Low-Level Resistance	Susceptible GSS 1.5		Susceptible GSS 1.5		Susceptible GSS 1.5		Susceptible GSS 1.5	Susceptible GSS 1.5	Susceptible GSS 1	Susceptible GSS 1.5		Susceptible GSS 1.5
xab_67 187161_E35E_M36M_N37C_R41R_I62I_L63L_A71V_N83N_C95R	Susceptible	Susceptible	Susceptible	Susceptible	Susceptible			Susceptible		Susceptible	Susceptible	Susceptible	Susceptible		Susceptible		Susceptible	Susceptible	Susceptible	Susceptible	Susceptible	Susceptible		Susceptible	Susceptible		Susceptible		Susceptible		Susceptible	Susceptible	Susceptible	Susceptible		Susceptible	Susceptible GSS 1.5		Susceptible GSS 1.5		Susceptible GSS 1.5		Susceptible GSS 1.5	Susceptible GSS 1.5	Susceptible GSS 1	Susceptible GSS 1.5		Susceptible GSS 1.5
xab_68 187161_E35E_M36M_N37C_R41R_I62I_L63P_A71A_N83D_C95C	Susceptible	Susceptible	Susceptible	Susceptible	Susceptible			Susceptible		Susceptible	Susceptible	Susceptible	Susceptible		Susceptible		Susceptible	Susceptible	Susceptible	Susceptible	Susceptible	Susceptible		Susceptible	Susceptible		Potential Low-Level Resistance		Susceptible		Potential Low-Level Resistance	Susceptible	Low-Level Resistance	Potential Low-Level Resistance		Low-Level Resistance	Susceptible GSS 1.5		Susceptible GSS 1.5		Susceptible GSS 1.5		Susceptible GSS 1.5	Susceptible GSS 1.5	Susceptible GSS 1	Susceptible GSS 1.5		Susceptible GSS 1.5
xab_69 187161_E35E_M36M_N37C_R41R_I62I_L63P_A71A_N83D_C95R	Susceptible	Susceptible	Susceptible	Susceptible	Susceptible			Susceptible		Susceptible	Susceptible	Susceptible	Susceptible		Susceptible		Susceptible	Susceptible	Susceptible	Susceptible	Susceptible	Susceptible		Susceptible	Susceptible		Potential Low-Level Resistance		Susceptible		Potential Low-Level Resistance	Susceptible	Low-Level Resistance	Potential Low-Level Resistance		Low-Level Resistance	Susceptible GSS 1.5		Susceptible GSS 1.5		Susceptible GSS 1.5		Susceptible GSS 1.5	Susceptible GSS 1.5	Susceptible GSS 1	Susceptible GSS 1.5		Susceptible GSS 1.5
xab_70 187161_E35E_M36M_N37C_R41R_I62I_L63P_A71A_N83N_C95C	Susceptible	Susceptible	Susceptible	Susceptible	Susceptible			Susceptible		Susceptible	Susceptible	Susceptible	Susceptible		Susceptible		Susceptible	Susceptible	Susceptible	Susceptible	Susceptible	Susceptible		Susceptible	Susceptible		Susceptible		Susceptible		Susceptible	Susceptible	Susceptible	Susceptible		Susceptible	Susceptible GSS 1.5		Susceptible GSS 1.5		Susceptible GSS 1.5		Susceptible GSS 1.5	Susceptible GSS 1.5	Susceptible GSS 1	Susceptible GSS 1.5		Susceptible GSS 1.5
xab_71 187161_E35E_M36M_N37C_R41R_I62I_L63P_A71A_N83N_C95R	Susceptible	Susceptible	Susceptible	Susceptible	Susceptible			Susceptible		Susceptible	Susceptible	Susceptible	Susceptible		Susceptible		Susceptible	Susceptible	Susceptible	Susceptible	Susceptible	Susceptible		Susceptible	Susceptible		Susceptible		Susceptible		Susceptible	Susceptible	Susceptible	Susceptible		Susceptible	Susceptible GSS 1.5		Susceptible GSS 1.5		Susceptible GSS 1.5		Susceptible GSS 1.5	Susceptible GSS 1.5	Susceptible GSS 1	Susceptible GSS 1.5		Susceptible GSS 1.5
xab_72 187161_E35E_M36M_N37C_R41R_I62L_L63L_A71A_N83D_C95C	Susceptible	Susceptible	Susceptible	Susceptible	Susceptible			Susceptible		Susceptible	Susceptible	Susceptible	Susceptible		Susceptible		Susceptible	Susceptible	Susceptible	Susceptible	Susceptible	Susceptible		Susceptible	Susceptible		Potential Low-Level Resistance		Susceptible		Potential Low-Level Resistance	Susceptible	Low-Level Resistance	Potential Low-Level Resistance		Low-Level Resistance	Susceptible GSS 1.5		Susceptible GSS 1.5		Susceptible GSS 1.5		Susceptible GSS 1.5	Susceptible GSS 1.5	Susceptible GSS 1	Susceptible GSS 1.5		Susceptible GSS 1.5
xab_73 187161_E35E_M36M_N37C_R41R_I62L_L63L_A71A_N83D_C95R	Susceptible	Susceptible	Susceptible	Susceptible	Susceptible			Susceptible		Susceptible	Susceptible	Susceptible	Susceptible		Susceptible		Susceptible	Susceptible	Susceptible	Susceptible	Susceptible	Susceptible		Susceptible	Susceptible		Potential Low-Level Resistance		Susceptible		Potential Low-Level Resistance	Susceptible	Low-Level Resistance	Potential Low-Level Resistance		Low-Level Resistance	Susceptible GSS 1.5		Susceptible GSS 1.5		Susceptible GSS 1.5		Susceptible GSS 1.5	Susceptible GSS 1.5	Susceptible GSS 1	Susceptible GSS 1.5		Susceptible GSS 1.5
xab_74 187161_E35E_M36M_N37C_R41R_I62L_L63L_A71A_N83N_C95C	Susceptible	Susceptible	Susceptible	Susceptible	Susceptible			Susceptible		Susceptible	Susceptible	Susceptible	Susceptible		Susceptible		Susceptible	Susceptible	Susceptible	Susceptible	Susceptible	Susceptible		Susceptible	Susceptible		Susceptible		Susceptible		Susceptible	Susceptible	Susceptible	Susceptible		Susceptible	Susceptible GSS 1.5		Susceptible GSS 1.5		Susceptible GSS 1.5		Susceptible GSS 1.5	Susceptible GSS 1.5	Susceptible GSS 1	Susceptible GSS 1.5		Susceptible GSS 1.5
xab_75 187161_E35E_M36M_N37C_R41R_I62L_L63L_A71A_N83N_C95R	Susceptible	Susceptible	Susceptible	Susceptible	Susceptible			Susceptible		Susceptible	Susceptible	Susceptible	Susceptible		Susceptible		Susceptible	Susceptible	Susceptible	Susceptible	Susceptible	Susceptible		Susceptible	Susceptible		Susceptible		Susceptible		Susceptible	Susceptible	Susceptible	Susceptible		Susceptible	Susceptible GSS 1.5		Susceptible GSS 1.5		Susceptible GSS 1.5		Susceptible GSS 1.5	Susceptible GSS 1.5	Susceptible GSS 1	Susceptible GSS 1.5		Susceptible GSS 1.5
xab_76 187161_E35E_M36M_N37C_R41R_I62L_L63L_A71V_N83N_C95C	Susceptible	Susceptible	Susceptible	Susceptible	Susceptible			Susceptible		Susceptible	Susceptible	Susceptible	Susceptible		Susceptible		Susceptible	Susceptible	Susceptible	Susceptible	Susceptible	Susceptible		Susceptible	Susceptible		Susceptible		Susceptible		Susceptible	Susceptible	Susceptible	Susceptible		Susceptible	Susceptible GSS 1.5		Susceptible GSS 1.5		Susceptible GSS 1.5		Susceptible GSS 1.5	Susceptible GSS 1.5	Susceptible GSS 1	Susceptible GSS 1.5		Susceptible GSS 1.5
xab_77 187161_E35E_M36M_N37C_R41R_I62L_L63P_A71A_N83D_C95C	Susceptible	Susceptible	Susceptible	Susceptible	Susceptible			Susceptible		Susceptible	Susceptible	Susceptible	Susceptible		Susceptible		Susceptible	Susceptible	Susceptible	Susceptible	Susceptible	Susceptible		Susceptible	Susceptible		Potential Low-Level Resistance		Susceptible		Potential Low-Level Resistance	Susceptible	Low-Level Resistance	Potential Low-Level Resistance		Low-Level Resistance	Susceptible GSS 1.5		Susceptible GSS 1.5		Susceptible GSS 1.5		Susceptible GSS 1.5	Susceptible GSS 1.5	Susceptible GSS 1	Susceptible GSS 1.5		Susceptible GSS 1.5
xab_78 187161_E35E_M36M_N37C_R41R_I62L_L63P_A71A_N83D_C95R	Susceptible	Susceptible	Susceptible	Susceptible	Susceptible			Susceptible		Susceptible	Susceptible	Susceptible	Susceptible		Susceptible		Susceptible	Susceptible	Susceptible	Susceptible	Susceptible	Susceptible		Susceptible	Susceptible		Potential Low-Level Resistance		Susceptible		Potential Low-Level Resistance	Susceptible	Low-Level Resistance	Potential Low-Level Resistance		Low-Level Resistance	Susceptible GSS 1.5		Susceptible GSS 1.5		Susceptible GSS 1.5		Susceptible GSS 1.5	Susceptible GSS 1.5	Susceptible GSS 1	Susceptible GSS 1.5		Susceptible GSS 1.5
xab_79 187161_E35E_M36M_N37C_R41R_I62L_L63P_A71A_N83N_C95C	Susceptible	Susceptible	Susceptible	Susceptible	Susceptible			Susceptible		Susceptible	Susceptible	Susceptible	Susceptible		Susceptible		Susceptible	Susceptible	Susceptible	Susceptible	Susceptible	Susceptible		Susceptible	Susceptible		Susceptible		Susceptible		Susceptible	Susceptible	Susceptible	Susceptible		Susceptible	Susceptible GSS 1.5		Susceptible GSS 1.5		Susceptible GSS 1.5		Susceptible GSS 1.5	Susceptible GSS 1.5	Susceptible GSS 1	Susceptible GSS 1.5		Susceptible GSS 1.5
xab_80 187161_E35E_M36M_N37C_R41R_I62L_L63P_A71A_N83N_C95R	Susceptible	Susceptible	Susceptible	Susceptible	Susceptible			Susceptible		Susceptible	Susceptible	Susceptible	Susceptible		Susceptible		Susceptible	Susceptible	Susceptible	Susceptible	Susceptible	Susceptible		Susceptible	Susceptible		Susceptible		Susceptible		Susceptible	Susceptible	Susceptible	Susceptible		Susceptible	Susceptible GSS 1.5		Susceptible GSS 1.5		Susceptible GSS 1.5		Susceptible GSS 1.5	Susceptible GSS 1.5	Susceptible GSS 1	Susceptible GSS 1.5		Susceptible GSS 1.5
xab_81 187161_E35E_M36M_N37C_R41R_I62L_L63P_A71V_N83D_C95C	Susceptible	Susceptible	Susceptible	Susceptible	Susceptible			Susceptible		Susceptible	Susceptible	Susceptible	Susceptible		Susceptible		Susceptible	Susceptible	Susceptible	Susceptible	Susceptible	Susceptible		Susceptible	Susceptible		Potential Low-Level Resistance		Susceptible		Potential Low-Level Resistance	Susceptible	Low-Level Resistance	Potential Low-Level Resistance		Low-Level Resistance	Susceptible GSS 1.5		Susceptible GSS 1.5		Susceptible GSS 1.5		Susceptible GSS 1.5	Susceptible GSS 1.5	Susceptible GSS 1	Susceptible GSS 1.5		Susceptible GSS 1.5
xab_82 187161_E35E_M36M_N37C_R41R_I62L_L63P_A71V_N83D_C95R	Susceptible	Susceptible	Susceptible	Susceptible	Susceptible			Susceptible		Susceptible	Susceptible	Susceptible	Susceptible		Susceptible		Susceptible	Susceptible	Susceptible	Susceptible	Susceptible	Susceptible		Susceptible	Susceptible		Potential Low-Level Resistance		Susceptible		Potential Low-Level Resistance	Susceptible	Low-Level Resistance	Potential Low-Level Resistance		Low-Level Resistance	Susceptible GSS 1.5		Susceptible GSS 1.5		Susceptible GSS 1.5		Susceptible GSS 1.5	Susceptible GSS 1.5	Susceptible GSS 1	Susceptible GSS 1.5		Susceptible GSS 1.5
xab_83 187161_E35E_M36M_N37C_R41R_I62L_L63P_A71V_N83N_C95C	Susceptible	Susceptible	Susceptible	Susceptible	Susceptible			Susceptible		Susceptible	Susceptible	Susceptible	Susceptible		Susceptible		Susceptible	Susceptible	Susceptible	Susceptible	Susceptible	Susceptible		Susceptible	Susceptible		Susceptible		Susceptible		Susceptible	Susceptible	Susceptible	Susceptible		Susceptible	Susceptible GSS 1.5		Susceptible GSS 1.5		Susceptible GSS 1.5		Susceptible GSS 1.5	Susceptible GSS 1.5	Susceptible GSS 1	Susceptible GSS 1.5		Susceptible GSS 1.5
xab_84 187161_E35E_M36M_N37C_R41R_I62L_L63P_A71V_N83N_C95R	Susceptible	Susceptible	Susceptible	Susceptible	Susceptible			Susceptible		Susceptible	Susceptible	Susceptible	Susceptible		Susceptible		Susceptible	Susceptible	Susceptible	Susceptible	Susceptible	Susceptible		Susceptible	Susceptible		Susceptible		Susceptible		Susceptible	Susceptible	Susceptible	Susceptible		Susceptible	Susceptible GSS 1.5		Susceptible GSS 1.5		Susceptible GSS 1.5		Susceptible GSS 1.5	Susceptible GSS 1.5	Susceptible GSS 1	Susceptible GSS 1.5		Susceptible GSS 1.5
xab_85 187161_E35E_M36M_N37N_R41K_I62I_L63L_A71A_N83D_C95C	Susceptible	Susceptible	Susceptible	Susceptible	Susceptible			Susceptible		Susceptible	Susceptible	Susceptible	Susceptible		Susceptible		Susceptible	Susceptible	Susceptible	Susceptible	Susceptible	Susceptible		Susceptible	Susceptible		Potential Low-Level Resistance		Susceptible		Potential Low-Level Resistance	Susceptible	Low-Level Resistance	Potential Low-Level Resistance		Low-Level Resistance	Susceptible GSS 1.5		Susceptible GSS 1.5		Susceptible GSS 1.5		Susceptible GSS 1.5	Susceptible GSS 1.5	Susceptible GSS 1	Susceptible GSS 1.5		Susceptible GSS 1.5
xab_86 187161_E35E_M36M_N37N_R41K_I62I_L63L_A71A_N83D_C95R	Susceptible	Susceptible	Susceptible	Susceptible	Susceptible			Susceptible		Susceptible	Susceptible	Susceptible	Susceptible		Susceptible		Susceptible	Susceptible	Susceptible	Susceptible	Susceptible	Susceptible		Susceptible	Susceptible		Potential Low-Level Resistance		Susceptible		Potential Low-Level Resistance	Susceptible	Low-Level Resistance	Potential Low-Level Resistance		Low-Level Resistance	Susceptible GSS 1.5		Susceptible GSS 1.5		Susceptible GSS 1.5		Susceptible GSS 1.5	Susceptible GSS 1.5	Susceptible GSS 1	Susceptible GSS 1.5		Susceptible GSS 1.5
xab_87 187161_E35E_M36M_N37N_R41K_I62I_L63L_A71A_N83N_C95C	Susceptible	Susceptible	Susceptible	Susceptible	Susceptible			Susceptible		Susceptible	Susceptible	Susceptible	Susceptible		Susceptible		Susceptible	Susceptible	Susceptible	Susceptible	Susceptible	Susceptible		Susceptible	Susceptible		Susceptible		Susceptible		Susceptible	Susceptible	Susceptible	Susceptible		Susceptible	Susceptible GSS 1.5		Susceptible GSS 1.5		Susceptible GSS 1.5		Susceptible GSS 1.5	Susceptible GSS 1.5	Susceptible GSS 1	Susceptible GSS 1.5		Susceptible GSS 1.5
xab_88 187161_E35E_M36M_N37N_R41K_I62I_L63L_A71A_N83N_C95R	Susceptible	Susceptible	Susceptible	Susceptible	Susceptible			Susceptible		Susceptible	Susceptible	Susceptible	Susceptible		Susceptible		Susceptible	Susceptible	Susceptible	Susceptible	Susceptible	Susceptible		Susceptible	Susceptible		Susceptible		Susceptible		Susceptible	Susceptible	Susceptible	Susceptible		Susceptible	Susceptible GSS 1.5		Susceptible GSS 1.5		Susceptible GSS 1.5		Susceptible GSS 1.5	Susceptible GSS 1.5	Susceptible GSS 1	Susceptible GSS 1.5		Susceptible GSS 1.5
xab_89 187161_E35E_M36M_N37N_R41K_I62L_L63L_A71A_N83D_C95C	Susceptible	Susceptible	Susceptible	Susceptible	Susceptible			Susceptible		Susceptible	Susceptible	Susceptible	Susceptible		Susceptible		Susceptible	Susceptible	Susceptible	Susceptible	Susceptible	Susceptible		Susceptible	Susceptible		Potential Low-Level Resistance		Susceptible		Potential Low-Level Resistance	Susceptible	Low-Level Resistance	Potential Low-Level Resistance		Low-Level Resistance	Susceptible GSS 1.5		Susceptible GSS 1.5		Susceptible GSS 1.5		Susceptible GSS 1.5	Susceptible GSS 1.5	Susceptible GSS 1	Susceptible GSS 1.5		Susceptible GSS 1.5
xab_90 187161_E35E_M36M_N37N_R41K_I62L_L63L_A71A_N83N_C95C	Susceptible	Susceptible	Susceptible	Susceptible	Susceptible			Susceptible		Susceptible	Susceptible	Susceptible	Susceptible		Susceptible		Susceptible	Susceptible	Susceptible	Susceptible	Susceptible	Susceptible		Susceptible	Susceptible		Susceptible		Susceptible		Susceptible	Susceptible	Susceptible	Susceptible		Susceptible	Susceptible GSS 1.5		Susceptible GSS 1.5		Susceptible GSS 1.5		Susceptible GSS 1.5	Susceptible GSS 1.5	Susceptible GSS 1	Susceptible GSS 1.5		Susceptible GSS 1.5
xab_91 187161_E35E_M36M_N37N_R41K_I62L_L63P_A71A_N83D_C95C	Susceptible	Susceptible	Susceptible	Susceptible	Susceptible			Susceptible		Susceptible	Susceptible	Susceptible	Susceptible		Susceptible		Susceptible	Susceptible	Susceptible	Susceptible	Susceptible	Susceptible		Susceptible	Susceptible		Potential Low-Level Resistance		Susceptible		Potential Low-Level Resistance	Susceptible	Low-Level Resistance	Potential Low-Level Resistance		Low-Level Resistance	Susceptible GSS 1.5		Susceptible GSS 1.5		Susceptible GSS 1.5		Susceptible GSS 1.5	Susceptible GSS 1.5	Susceptible GSS 1	Susceptible GSS 1.5		Susceptible GSS 1.5
xab_92 187161_E35E_M36M_N37N_R41K_I62L_L63P_A71V_N83D_C95C	Susceptible	Susceptible	Susceptible	Susceptible	Susceptible			Susceptible		Susceptible	Susceptible	Susceptible	Susceptible		Susceptible		Susceptible	Susceptible	Susceptible	Susceptible	Susceptible	Susceptible		Susceptible	Susceptible		Potential Low-Level Resistance		Susceptible		Potential Low-Level Resistance	Susceptible	Low-Level Resistance	Potential Low-Level Resistance		Low-Level Resistance	Susceptible GSS 1.5		Susceptible GSS 1.5		Susceptible GSS 1.5		Susceptible GSS 1.5	Susceptible GSS 1.5	Susceptible GSS 1	Susceptible GSS 1.5		Susceptible GSS 1.5
xab_93 187161_E35E_M36M_N37N_R41K_I62L_L63P_A71V_N83D_C95R	Susceptible	Susceptible	Susceptible	Susceptible	Susceptible			Susceptible		Susceptible	Susceptible	Susceptible	Susceptible		Susceptible		Susceptible	Susceptible	Susceptible	Susceptible	Susceptible	Susceptible		Susceptible	Susceptible		Potential Low-Level Resistance		Susceptible		Potential Low-Level Resistance	Susceptible	Low-Level Resistance	Potential Low-Level Resistance		Low-Level Resistance	Susceptible GSS 1.5		Susceptible GSS 1.5		Susceptible GSS 1.5		Susceptible GSS 1.5	Susceptible GSS 1.5	Susceptible GSS 1	Susceptible GSS 1.5		Susceptible GSS 1.5
xab_94 187161_E35E_M36M_N37N_R41K_I62L_L63P_A71V_N83N_C95C	Susceptible	Susceptible	Susceptible	Susceptible	Susceptible			Susceptible		Susceptible	Susceptible	Susceptible	Susceptible		Susceptible		Susceptible	Susceptible	Susceptible	Susceptible	Susceptible	Susceptible		Susceptible	Susceptible		Susceptible		Susceptible		Susceptible	Susceptible	Susceptible	Susceptible		Susceptible	Susceptible GSS 1.5		Susceptible GSS 1.5		Susceptible GSS 1.5		Susceptible GSS 1.5	Susceptible GSS 1.5	Susceptible GSS 1	Susceptible GSS 1.5		Susceptible GSS 1.5
xab_95 187161_E35E_M36M_N37N_R41K_I62L_L63P_A71V_N83N_C95R	Susceptible	Susceptible	Susceptible	Susceptible	Susceptible			Susceptible		Susceptible	Susceptible	Susceptible	Susceptible		Susceptible		Susceptible	Susceptible	Susceptible	Susceptible	Susceptible	Susceptible		Susceptible	Susceptible		Susceptible		Susceptible		Susceptible	Susceptible	Susceptible	Susceptible		Susceptible	Susceptible GSS 1.5		Susceptible GSS 1.5		Susceptible GSS 1.5		Susceptible GSS 1.5	Susceptible GSS 1.5	Susceptible GSS 1	Susceptible GSS 1.5		Susceptible GSS 1.5
xab_96 187161_E35E_M36M_N37N_R41R_I62I_L63L_A71A_N83D_C95C	Susceptible	Susceptible	Susceptible	Susceptible	Susceptible			Susceptible		Susceptible	Susceptible	Susceptible	Susceptible		Susceptible		Susceptible	Susceptible	Susceptible	Susceptible	Susceptible	Susceptible		Susceptible	Susceptible		Potential Low-Level Resistance		Susceptible		Potential Low-Level Resistance	Susceptible	Low-Level Resistance	Potential Low-Level Resistance		Low-Level Resistance	Susceptible GSS 1.5		Susceptible GSS 1.5		Susceptible GSS 1.5		Susceptible GSS 1.5	Susceptible GSS 1.5	Susceptible GSS 1	Susceptible GSS 1.5		Susceptible GSS 1.5
xab_97 187161_E35E_M36M_N37N_R41R_I62I_L63L_A71A_N83D_C95R	Susceptible	Susceptible	Susceptible	Susceptible	Susceptible			Susceptible		Susceptible	Susceptible	Susceptible	Susceptible		Susceptible		Susceptible	Susceptible	Susceptible	Susceptible	Susceptible	Susceptible		Susceptible	Susceptible		Potential Low-Level Resistance		Susceptible		Potential Low-Level Resistance	Susceptible	Low-Level Resistance	Potential Low-Level Resistance		Low-Level Resistance	Susceptible GSS 1.5		Susceptible GSS 1.5		Susceptible GSS 1.5		Susceptible GSS 1.5	Susceptible GSS 1.5	Susceptible GSS 1	Susceptible GSS 1.5		Susceptible GSS 1.5
xab_98 187161_E35E_M36M_N37N_R41R_I62I_L63L_A71A_N83N_C95C	Susceptible	Susceptible	Susceptible	Susceptible	Susceptible			Susceptible		Susceptible	Susceptible	Susceptible	Susceptible		Susceptible		Susceptible	Susceptible	Susceptible	Susceptible	Susceptible	Susceptible		Susceptible	Susceptible		Susceptible		Susceptible		Susceptible	Susceptible	Susceptible	Susceptible		Susceptible	Susceptible GSS 1.5		Susceptible GSS 1.5		Susceptible GSS 1.5		Susceptible GSS 1.5	Susceptible GSS 1.5	Susceptible GSS 1	Susceptible GSS 1.5		Susceptible GSS 1.5
xab_99 187161_E35E_M36M_N37N_R41R_I62I_L63L_A71A_N83N_C95R	Susceptible	Susceptible	Susceptible	Susceptible	Susceptible			Susceptible		Susceptible	Susceptible	Susceptible	Susceptible		Susceptible		Susceptible	Susceptible	Susceptible	Susceptible	Susceptible	Susceptible		Susceptible	Susceptible		Susceptible		Susceptible		Susceptible	Susceptible	Susceptible	Susceptible		Susceptible	Susceptible GSS 1.5		Susceptible GSS 1.5		Susceptible GSS 1.5		Susceptible GSS 1.5	Susceptible GSS 1.5	Susceptible GSS 1	Susceptible GSS 1.5		Susceptible GSS 1.5
xab_100 187161_E35E_M36M_N37N_R41R_I62I_L63L_A71V_N83D_C95R	Susceptible	Susceptible	Susceptible	Susceptible	Susceptible			Susceptible		Susceptible	Susceptible	Susceptible	Susceptible		Susceptible		Susceptible	Susceptible	Susceptible	Susceptible	Susceptible	Susceptible		Susceptible	Susceptible		Potential Low-Level Resistance		Susceptible		Potential Low-Level Resistance	Susceptible	Low-Level Resistance	Potential Low-Level Resistance		Low-Level Resistance	Susceptible GSS 1.5		Susceptible GSS 1.5		Susceptible GSS 1.5		Susceptible GSS 1.5	Susceptible GSS 1.5	Susceptible GSS 1	Susceptible GSS 1.5		Susceptible GSS 1.5
xab_101 187161_E35E_M36M_N37N_R41R_I62I_L63L_A71V_N83N_C95R	Susceptible	Susceptible	Susceptible	Susceptible	Susceptible			Susceptible		Susceptible	Susceptible	Susceptible	Susceptible		Susceptible		Susceptible	Susceptible	Susceptible	Susceptible	Susceptible	Susceptible		Susceptible	Susceptible		Susceptible		Susceptible		Susceptible	Susceptible	Susceptible	Susceptible		Susceptible	Susceptible GSS 1.5		Susceptible GSS 1.5		Susceptible GSS 1.5		Susceptible GSS 1.5	Susceptible GSS 1.5	Susceptible GSS 1	Susceptible GSS 1.5		Susceptible GSS 1.5
xab_102 187161_E35E_M36M_N37N_R41R_I62I_L63P_A71A_N83D_C95C	Susceptible	Susceptible	Susceptible	Susceptible	Susceptible			Susceptible		Susceptible	Susceptible	Susceptible	Susceptible		Susceptible		Susceptible	Susceptible	Susceptible	Susceptible	Susceptible	Susceptible		Susceptible	Susceptible		Potential Low-Level Resistance		Susceptible		Potential Low-Level Resistance	Susceptible	Low-Level Resistance	Potential Low-Level Resistance		Low-Level Resistance	Susceptible GSS 1.5		Susceptible GSS 1.5		Susceptible GSS 1.5		Susceptible GSS 1.5	Susceptible GSS 1.5	Susceptible GSS 1	Susceptible GSS 1.5		Susceptible GSS 1.5
xab_103 187161_E35E_M36M_N37N_R41R_I62I_L63P_A71A_N83D_C95R	Susceptible	Susceptible	Susceptible	Susceptible	Susceptible			Susceptible		Susceptible	Susceptible	Susceptible	Susceptible		Susceptible		Susceptible	Susceptible	Susceptible	Susceptible	Susceptible	Susceptible		Susceptible	Susceptible		Potential Low-Level Resistance		Susceptible		Potential Low-Level Resistance	Susceptible	Low-Level Resistance	Potential Low-Level Resistance		Low-Level Resistance	Susceptible GSS 1.5		Susceptible GSS 1.5		Susceptible GSS 1.5		Susceptible GSS 1.5	Susceptible GSS 1.5	Susceptible GSS 1	Susceptible GSS 1.5		Susceptible GSS 1.5
xab_104 187161_E35E_M36M_N37N_R41R_I62I_L63P_A71A_N83N_C95C	Susceptible	Susceptible	Susceptible	Susceptible	Susceptible			Susceptible		Susceptible	Susceptible	Susceptible	Susceptible		Susceptible		Susceptible	Susceptible	Susceptible	Susceptible	Susceptible	Susceptible		Susceptible	Susceptible		Susceptible		Susceptible		Susceptible	Susceptible	Susceptible	Susceptible		Susceptible	Susceptible GSS 1.5		Susceptible GSS 1.5		Susceptible GSS 1.5		Susceptible GSS 1.5	Susceptible GSS 1.5	Susceptible GSS 1	Susceptible GSS 1.5		Susceptible GSS 1.5
xab_105 187161_E35E_M36M_N37N_R41R_I62I_L63P_A71A_N83N_C95R	Susceptible	Susceptible	Susceptible	Susceptible	Susceptible			Susceptible		Susceptible	Susceptible	Susceptible	Susceptible		Susceptible		Susceptible	Susceptible	Susceptible	Susceptible	Susceptible	Susceptible		Susceptible	Susceptible		Susceptible		Susceptible		Susceptible	Susceptible	Susceptible	Susceptible		Susceptible	Susceptible GSS 1.5		Susceptible GSS 1.5		Susceptible GSS 1.5		Susceptible GSS 1.5	Susceptible GSS 1.5	Susceptible GSS 1	Susceptible GSS 1.5		Susceptible GSS 1.5
xab_106 187161_E35E_M36M_N37N_R41R_I62I_L63P_A71V_N83N_C95R	Susceptible	Susceptible	Susceptible	Susceptible	Susceptible			Susceptible		Susceptible	Susceptible	Susceptible	Susceptible		Susceptible		Susceptible	Susceptible	Susceptible	Susceptible	Susceptible	Susceptible		Susceptible	Susceptible		Susceptible		Susceptible		Susceptible	Susceptible	Susceptible	Susceptible		Susceptible	Susceptible GSS 1.5		Susceptible GSS 1.5		Susceptible GSS 1.5		Susceptible GSS 1.5	Susceptible GSS 1.5	Susceptible GSS 1	Susceptible GSS 1.5		Susceptible GSS 1.5
xab_107 187161_E35E_M36M_N37N_R41R_I62L_L63L_A71A_N83D_C95C	Susceptible	Susceptible	Susceptible	Susceptible	Susceptible			Susceptible		Susceptible	Susceptible	Susceptible	Susceptible		Susceptible		Susceptible	Susceptible	Susceptible	Susceptible	Susceptible	Susceptible		Susceptible	Susceptible		Potential Low-Level Resistance		Susceptible		Potential Low-Level Resistance	Susceptible	Low-Level Resistance	Potential Low-Level Resistance		Low-Level Resistance	Susceptible GSS 1.5		Susceptible GSS 1.5		Susceptible GSS 1.5		Susceptible GSS 1.5	Susceptible GSS 1.5	Susceptible GSS 1	Susceptible GSS 1.5		Susceptible GSS 1.5
xab_108 187161_E35E_M36M_N37N_R41R_I62L_L63L_A71A_N83D_C95R	Susceptible	Susceptible	Susceptible	Susceptible	Susceptible			Susceptible		Susceptible	Susceptible	Susceptible	Susceptible		Susceptible		Susceptible	Susceptible	Susceptible	Susceptible	Susceptible	Susceptible		Susceptible	Susceptible		Potential Low-Level Resistance		Susceptible		Potential Low-Level Resistance	Susceptible	Low-Level Resistance	Potential Low-Level Resistance		Low-Level Resistance	Susceptible GSS 1.5		Susceptible GSS 1.5		Susceptible GSS 1.5		Susceptible GSS 1.5	Susceptible GSS 1.5	Susceptible GSS 1	Susceptible GSS 1.5		Susceptible GSS 1.5
xab_109 187161_E35E_M36M_N37N_R41R_I62L_L63L_A71A_N83N_C95C	Susceptible	Susceptible	Susceptible	Susceptible	Susceptible			Susceptible		Susceptible	Susceptible	Susceptible	Susceptible		Susceptible		Susceptible	Susceptible	Susceptible	Susceptible	Susceptible	Susceptible		Susceptible	Susceptible		Susceptible		Susceptible		Susceptible	Susceptible	Susceptible	Susceptible		Susceptible	Susceptible GSS 1.5		Susceptible GSS 1.5		Susceptible GSS 1.5		Susceptible GSS 1.5	Susceptible GSS 1.5	Susceptible GSS 1	Susceptible GSS 1.5		Susceptible GSS 1.5
xab_110 187161_E35E_M36M_N37N_R41R_I62L_L63L_A71A_N83N_C95R	Susceptible	Susceptible	Susceptible	Susceptible	Susceptible			Susceptible		Susceptible	Susceptible	Susceptible	Susceptible		Susceptible		Susceptible	Susceptible	Susceptible	Susceptible	Susceptible	Susceptible		Susceptible	Susceptible		Susceptible		Susceptible		Susceptible	Susceptible	Susceptible	Susceptible		Susceptible	Susceptible GSS 1.5		Susceptible GSS 1.5		Susceptible GSS 1.5		Susceptible GSS 1.5	Susceptible GSS 1.5	Susceptible GSS 1	Susceptible GSS 1.5		Susceptible GSS 1.5
xab_111 187161_E35E_M36M_N37N_R41R_I62L_L63P_A71A_N83D_C95C	Susceptible	Susceptible	Susceptible	Susceptible	Susceptible			Susceptible		Susceptible	Susceptible	Susceptible	Susceptible		Susceptible		Susceptible	Susceptible	Susceptible	Susceptible	Susceptible	Susceptible		Susceptible	Susceptible		Potential Low-Level Resistance		Susceptible		Potential Low-Level Resistance	Susceptible	Low-Level Resistance	Potential Low-Level Resistance		Low-Level Resistance	Susceptible GSS 1.5		Susceptible GSS 1.5		Susceptible GSS 1.5		Susceptible GSS 1.5	Susceptible GSS 1.5	Susceptible GSS 1	Susceptible GSS 1.5		Susceptible GSS 1.5
xab_112 187161_E35E_M36M_N37N_R41R_I62L_L63P_A71A_N83D_C95R	Susceptible	Susceptible	Susceptible	Susceptible	Susceptible			Susceptible		Susceptible	Susceptible	Susceptible	Susceptible		Susceptible		Susceptible	Susceptible	Susceptible	Susceptible	Susceptible	Susceptible		Susceptible	Susceptible		Potential Low-Level Resistance		Susceptible		Potential Low-Level Resistance	Susceptible	Low-Level Resistance	Potential Low-Level Resistance		Low-Level Resistance	Susceptible GSS 1.5		Susceptible GSS 1.5		Susceptible GSS 1.5		Susceptible GSS 1.5	Susceptible GSS 1.5	Susceptible GSS 1	Susceptible GSS 1.5		Susceptible GSS 1.5
xab_113 187161_E35E_M36M_N37N_R41R_I62L_L63P_A71A_N83N_C95C	Susceptible	Susceptible	Susceptible	Susceptible	Susceptible			Susceptible		Susceptible	Susceptible	Susceptible	Susceptible		Susceptible		Susceptible	Susceptible	Susceptible	Susceptible	Susceptible	Susceptible		Susceptible	Susceptible		Susceptible		Susceptible		Susceptible	Susceptible	Susceptible	Susceptible		Susceptible	Susceptible GSS 1.5		Susceptible GSS 1.5		Susceptible GSS 1.5		Susceptible GSS 1.5	Susceptible GSS 1.5	Susceptible GSS 1	Susceptible GSS 1.5		Susceptible GSS 1.5
xab_114 187161_E35E_M36M_N37N_R41R_I62L_L63P_A71A_N83N_C95R	Susceptible	Susceptible	Susceptible	Susceptible	Susceptible			Susceptible		Susceptible	Susceptible	Susceptible	Susceptible		Susceptible		Susceptible	Susceptible	Susceptible	Susceptible	Susceptible	Susceptible		Susceptible	Susceptible		Susceptible		Susceptible		Susceptible	Susceptible	Susceptible	Susceptible		Susceptible	Susceptible GSS 1.5		Susceptible GSS 1.5		Susceptible GSS 1.5		Susceptible GSS 1.5	Susceptible GSS 1.5	Susceptible GSS 1	Susceptible GSS 1.5		Susceptible GSS 1.5
xab_115 187161_E35E_M36M_N37N_R41R_I62L_L63P_A71V_N83D_C95C	Susceptible	Susceptible	Susceptible	Susceptible	Susceptible			Susceptible		Susceptible	Susceptible	Susceptible	Susceptible		Susceptible		Susceptible	Susceptible	Susceptible	Susceptible	Susceptible	Susceptible		Susceptible	Susceptible		Potential Low-Level Resistance		Susceptible		Potential Low-Level Resistance	Susceptible	Low-Level Resistance	Potential Low-Level Resistance		Low-Level Resistance	Susceptible GSS 1.5		Susceptible GSS 1.5		Susceptible GSS 1.5		Susceptible GSS 1.5	Susceptible GSS 1.5	Susceptible GSS 1	Susceptible GSS 1.5		Susceptible GSS 1.5
xab_116 187161_E35E_M36M_N37N_R41R_I62L_L63P_A71V_N83D_C95R	Susceptible	Susceptible	Susceptible	Susceptible	Susceptible			Susceptible		Susceptible	Susceptible	Susceptible	Susceptible		Susceptible		Susceptible	Susceptible	Susceptible	Susceptible	Susceptible	Susceptible		Susceptible	Susceptible		Potential Low-Level Resistance		Susceptible		Potential Low-Level Resistance	Susceptible	Low-Level Resistance	Potential Low-Level Resistance		Low-Level Resistance	Susceptible GSS 1.5		Susceptible GSS 1.5		Susceptible GSS 1.5		Susceptible GSS 1.5	Susceptible GSS 1.5	Susceptible GSS 1	Susceptible GSS 1.5		Susceptible GSS 1.5
xab_117 187161_E35E_M36M_N37N_R41R_I62L_L63P_A71V_N83N_C95C	Susceptible	Susceptible	Susceptible	Susceptible	Susceptible			Susceptible		Susceptible	Susceptible	Susceptible	Susceptible		Susceptible		Susceptible	Susceptible	Susceptible	Susceptible	Susceptible	Susceptible		Susceptible	Susceptible		Susceptible		Susceptible		Susceptible	Susceptible	Susceptible	Susceptible		Susceptible	Susceptible GSS 1.5		Susceptible GSS 1.5		Susceptible GSS 1.5		Susceptible GSS 1.5	Susceptible GSS 1.5	Susceptible GSS 1	Susceptible GSS 1.5		Susceptible GSS 1.5
xab_118 187161_E35E_M36M_N37N_R41R_I62L_L63P_A71V_N83N_C95R	Susceptible	Susceptible	Susceptible	Susceptible	Susceptible			Susceptible		Susceptible	Susceptible	Susceptible	Susceptible		Susceptible		Susceptible	Susceptible	Susceptible	Susceptible	Susceptible	Susceptible		Susceptible	Susceptible		Susceptible		Susceptible		Susceptible	Susceptible	Susceptible	Susceptible		Susceptible	Susceptible GSS 1.5		Susceptible GSS 1.5		Susceptible GSS 1.5		Susceptible GSS 1.5	Susceptible GSS 1.5	Susceptible GSS 1	Susceptible GSS 1.5		Susceptible GSS 1.5
xab_119 187161_E35E_M36M_N37S_R41K_I62I_L63L_A71A_N83D_C95C	Susceptible	Susceptible	Susceptible	Susceptible	Susceptible			Susceptible		Susceptible	Susceptible	Susceptible	Susceptible		Susceptible		Susceptible	Susceptible	Susceptible	Susceptible	Susceptible	Susceptible		Susceptible	Susceptible		Potential Low-Level Resistance		Susceptible		Potential Low-Level Resistance	Susceptible	Low-Level Resistance	Potential Low-Level Resistance		Low-Level Resistance	Susceptible GSS 1.5		Susceptible GSS 1.5		Susceptible GSS 1.5		Susceptible GSS 1.5	Susceptible GSS 1.5	Susceptible GSS 1	Susceptible GSS 1.5		Susceptible GSS 1.5
xab_120 187161_E35E_M36M_N37S_R41K_I62I_L63L_A71A_N83D_C95R	Susceptible	Susceptible	Susceptible	Susceptible	Susceptible			Susceptible		Susceptible	Susceptible	Susceptible	Susceptible		Susceptible		Susceptible	Susceptible	Susceptible	Susceptible	Susceptible	Susceptible		Susceptible	Susceptible		Potential Low-Level Resistance		Susceptible		Potential Low-Level Resistance	Susceptible	Low-Level Resistance	Potential Low-Level Resistance		Low-Level Resistance	Susceptible GSS 1.5		Susceptible GSS 1.5		Susceptible GSS 1.5		Susceptible GSS 1.5	Susceptible GSS 1.5	Susceptible GSS 1	Susceptible GSS 1.5		Susceptible GSS 1.5
xab_121 187161_E35E_M36M_N37S_R41K_I62I_L63L_A71A_N83N_C95C	Susceptible	Susceptible	Susceptible	Susceptible	Susceptible			Susceptible		Susceptible	Susceptible	Susceptible	Susceptible		Susceptible		Susceptible	Susceptible	Susceptible	Susceptible	Susceptible	Susceptible		Susceptible	Susceptible		Susceptible		Susceptible		Susceptible	Susceptible	Susceptible	Susceptible		Susceptible	Susceptible GSS 1.5		Susceptible GSS 1.5		Susceptible GSS 1.5		Susceptible GSS 1.5	Susceptible GSS 1.5	Susceptible GSS 1	Susceptible GSS 1.5		Susceptible GSS 1.5
xab_122 187161_E35E_M36M_N37S_R41K_I62I_L63L_A71A_N83N_C95R	Susceptible	Susceptible	Susceptible	Susceptible	Susceptible			Susceptible		Susceptible	Susceptible	Susceptible	Susceptible		Susceptible		Susceptible	Susceptible	Susceptible	Susceptible	Susceptible	Susceptible		Susceptible	Susceptible		Susceptible		Susceptible		Susceptible	Susceptible	Susceptible	Susceptible		Susceptible	Susceptible GSS 1.5		Susceptible GSS 1.5		Susceptible GSS 1.5		Susceptible GSS 1.5	Susceptible GSS 1.5	Susceptible GSS 1	Susceptible GSS 1.5		Susceptible GSS 1.5
xab_123 187161_E35E_M36M_N37S_R41K_I62L_L63L_A71A_N83D_C95C	Susceptible	Susceptible	Susceptible	Susceptible	Susceptible			Susceptible		Susceptible	Susceptible	Susceptible	Susceptible		Susceptible		Susceptible	Susceptible	Susceptible	Susceptible	Susceptible	Susceptible		Susceptible	Susceptible		Potential Low-Level Resistance		Susceptible		Potential Low-Level Resistance	Susceptible	Low-Level Resistance	Potential Low-Level Resistance		Low-Level Resistance	Susceptible GSS 1.5		Susceptible GSS 1.5		Susceptible GSS 1.5		Susceptible GSS 1.5	Susceptible GSS 1.5	Susceptible GSS 1	Susceptible GSS 1.5		Susceptible GSS 1.5
xab_124 187161_E35E_M36M_N37S_R41K_I62L_L63L_A71A_N83D_C95R	Susceptible	Susceptible	Susceptible	Susceptible	Susceptible			Susceptible		Susceptible	Susceptible	Susceptible	Susceptible		Susceptible		Susceptible	Susceptible	Susceptible	Susceptible	Susceptible	Susceptible		Susceptible	Susceptible		Potential Low-Level Resistance		Susceptible		Potential Low-Level Resistance	Susceptible	Low-Level Resistance	Potential Low-Level Resistance		Low-Level Resistance	Susceptible GSS 1.5		Susceptible GSS 1.5		Susceptible GSS 1.5		Susceptible GSS 1.5	Susceptible GSS 1.5	Susceptible GSS 1	Susceptible GSS 1.5		Susceptible GSS 1.5
xab_125 187161_E35E_M36M_N37S_R41K_I62L_L63L_A71A_N83N_C95C	Susceptible	Susceptible	Susceptible	Susceptible	Susceptible			Susceptible		Susceptible	Susceptible	Susceptible	Susceptible		Susceptible		Susceptible	Susceptible	Susceptible	Susceptible	Susceptible	Susceptible		Susceptible	Susceptible		Susceptible		Susceptible		Susceptible	Susceptible	Susceptible	Susceptible		Susceptible	Susceptible GSS 1.5		Susceptible GSS 1.5		Susceptible GSS 1.5		Susceptible GSS 1.5	Susceptible GSS 1.5	Susceptible GSS 1	Susceptible GSS 1.5		Susceptible GSS 1.5
xab_126 187161_E35E_M36M_N37S_R41K_I62L_L63L_A71A_N83N_C95R	Susceptible	Susceptible	Susceptible	Susceptible	Susceptible			Susceptible		Susceptible	Susceptible	Susceptible	Susceptible		Susceptible		Susceptible	Susceptible	Susceptible	Susceptible	Susceptible	Susceptible		Susceptible	Susceptible		Susceptible		Susceptible		Susceptible	Susceptible	Susceptible	Susceptible		Susceptible	Susceptible GSS 1.5		Susceptible GSS 1.5		Susceptible GSS 1.5		Susceptible GSS 1.5	Susceptible GSS 1.5	Susceptible GSS 1	Susceptible GSS 1.5		Susceptible GSS 1.5
xab_127 187161_E35E_M36M_N37S_R41K_I62L_L63P_A71A_N83D_C95C	Susceptible	Susceptible	Susceptible	Susceptible	Susceptible			Susceptible		Susceptible	Susceptible	Susceptible	Susceptible		Susceptible		Susceptible	Susceptible	Susceptible	Susceptible	Susceptible	Susceptible		Susceptible	Susceptible		Potential Low-Level Resistance		Susceptible		Potential Low-Level Resistance	Susceptible	Low-Level Resistance	Potential Low-Level Resistance		Low-Level Resistance	Susceptible GSS 1.5		Susceptible GSS 1.5		Susceptible GSS 1.5		Susceptible GSS 1.5	Susceptible GSS 1.5	Susceptible GSS 1	Susceptible GSS 1.5		Susceptible GSS 1.5
xab_128 187161_E35E_M36M_N37S_R41K_I62L_L63P_A71A_N83D_C95R	Susceptible	Susceptible	Susceptible	Susceptible	Susceptible			Susceptible		Susceptible	Susceptible	Susceptible	Susceptible		Susceptible		Susceptible	Susceptible	Susceptible	Susceptible	Susceptible	Susceptible		Susceptible	Susceptible		Potential Low-Level Resistance		Susceptible		Potential Low-Level Resistance	Susceptible	Low-Level Resistance	Potential Low-Level Resistance		Low-Level Resistance	Susceptible GSS 1.5		Susceptible GSS 1.5		Susceptible GSS 1.5		Susceptible GSS 1.5	Susceptible GSS 1.5	Susceptible GSS 1	Susceptible GSS 1.5		Susceptible GSS 1.5
xab_129 187161_E35E_M36M_N37S_R41K_I62L_L63P_A71A_N83N_C95C	Susceptible	Susceptible	Susceptible	Susceptible	Susceptible			Susceptible		Susceptible	Susceptible	Susceptible	Susceptible		Susceptible		Susceptible	Susceptible	Susceptible	Susceptible	Susceptible	Susceptible		Susceptible	Susceptible		Susceptible		Susceptible		Susceptible	Susceptible	Susceptible	Susceptible		Susceptible	Susceptible GSS 1.5		Susceptible GSS 1.5		Susceptible GSS 1.5		Susceptible GSS 1.5	Susceptible GSS 1.5	Susceptible GSS 1	Susceptible GSS 1.5		Susceptible GSS 1.5
xab_130 187161_E35E_M36M_N37S_R41K_I62L_L63P_A71A_N83N_C95R	Susceptible	Susceptible	Susceptible	Susceptible	Susceptible			Susceptible		Susceptible	Susceptible	Susceptible	Susceptible		Susceptible		Susceptible	Susceptible	Susceptible	Susceptible	Susceptible	Susceptible		Susceptible	Susceptible		Susceptible		Susceptible		Susceptible	Susceptible	Susceptible	Susceptible		Susceptible	Susceptible GSS 1.5		Susceptible GSS 1.5		Susceptible GSS 1.5		Susceptible GSS 1.5	Susceptible GSS 1.5	Susceptible GSS 1	Susceptible GSS 1.5		Susceptible GSS 1.5
xab_131 187161_E35E_M36M_N37S_R41K_I62L_L63P_A71V_N83D_C95C	Susceptible	Susceptible	Susceptible	Susceptible	Susceptible			Susceptible		Susceptible	Susceptible	Susceptible	Susceptible		Susceptible		Susceptible	Susceptible	Susceptible	Susceptible	Susceptible	Susceptible		Susceptible	Susceptible		Potential Low-Level Resistance		Susceptible		Potential Low-Level Resistance	Susceptible	Low-Level Resistance	Potential Low-Level Resistance		Low-Level Resistance	Susceptible GSS 1.5		Susceptible GSS 1.5		Susceptible GSS 1.5		Susceptible GSS 1.5	Susceptible GSS 1.5	Susceptible GSS 1	Susceptible GSS 1.5		Susceptible GSS 1.5
xab_132 187161_E35E_M36M_N37S_R41K_I62L_L63P_A71V_N83D_C95R	Susceptible	Susceptible	Susceptible	Susceptible	Susceptible			Susceptible		Susceptible	Susceptible	Susceptible	Susceptible		Susceptible		Susceptible	Susceptible	Susceptible	Susceptible	Susceptible	Susceptible		Susceptible	Susceptible		Potential Low-Level Resistance		Susceptible		Potential Low-Level Resistance	Susceptible	Low-Level Resistance	Potential Low-Level Resistance		Low-Level Resistance	Susceptible GSS 1.5		Susceptible GSS 1.5		Susceptible GSS 1.5		Susceptible GSS 1.5	Susceptible GSS 1.5	Susceptible GSS 1	Susceptible GSS 1.5		Susceptible GSS 1.5
xab_133 187161_E35E_M36M_N37S_R41K_I62L_L63P_A71V_N83N_C95C	Susceptible	Susceptible	Susceptible	Susceptible	Susceptible			Susceptible		Susceptible	Susceptible	Susceptible	Susceptible		Susceptible		Susceptible	Susceptible	Susceptible	Susceptible	Susceptible	Susceptible		Susceptible	Susceptible		Susceptible		Susceptible		Susceptible	Susceptible	Susceptible	Susceptible		Susceptible	Susceptible GSS 1.5		Susceptible GSS 1.5		Susceptible GSS 1.5		Susceptible GSS 1.5	Susceptible GSS 1.5	Susceptible GSS 1	Susceptible GSS 1.5		Susceptible GSS 1.5
xab_134 187161_E35E_M36M_N37S_R41K_I62L_L63P_A71V_N83N_C95R	Susceptible	Susceptible	Susceptible	Susceptible	Susceptible			Susceptible		Susceptible	Susceptible	Susceptible	Susceptible		Susceptible		Susceptible	Susceptible	Susceptible	Susceptible	Susceptible	Susceptible		Susceptible	Susceptible		Susceptible		Susceptible		Susceptible	Susceptible	Susceptible	Susceptible		Susceptible	Susceptible GSS 1.5		Susceptible GSS 1.5		Susceptible GSS 1.5		Susceptible GSS 1.5	Susceptible GSS 1.5	Susceptible GSS 1	Susceptible GSS 1.5		Susceptible GSS 1.5
xab_135 187161_E35E_M36M_N37S_R41R_I62I_L63L_A71A_N83D_C95C	Susceptible	Susceptible	Susceptible	Susceptible	Susceptible			Susceptible		Susceptible	Susceptible	Susceptible	Susceptible		Susceptible		Susceptible	Susceptible	Susceptible	Susceptible	Susceptible	Susceptible		Susceptible	Susceptible		Potential Low-Level Resistance		Susceptible		Potential Low-Level Resistance	Susceptible	Low-Level Resistance	Potential Low-Level Resistance		Low-Level Resistance	Susceptible GSS 1.5		Susceptible GSS 1.5		Susceptible GSS 1.5		Susceptible GSS 1.5	Susceptible GSS 1.5	Susceptible GSS 1	Susceptible GSS 1.5		Susceptible GSS 1.5
xab_136 187161_E35E_M36M_N37S_R41R_I62I_L63L_A71A_N83D_C95R	Susceptible	Susceptible	Susceptible	Susceptible	Susceptible			Susceptible		Susceptible	Susceptible	Susceptible	Susceptible		Susceptible		Susceptible	Susceptible	Susceptible	Susceptible	Susceptible	Susceptible		Susceptible	Susceptible		Potential Low-Level Resistance		Susceptible		Potential Low-Level Resistance	Susceptible	Low-Level Resistance	Potential Low-Level Resistance		Low-Level Resistance	Susceptible GSS 1.5		Susceptible GSS 1.5		Susceptible GSS 1.5		Susceptible GSS 1.5	Susceptible GSS 1.5	Susceptible GSS 1	Susceptible GSS 1.5		Susceptible GSS 1.5
xab_137 187161_E35E_M36M_N37S_R41R_I62I_L63L_A71A_N83N_C95C	Susceptible	Susceptible	Susceptible	Susceptible	Susceptible			Susceptible		Susceptible	Susceptible	Susceptible	Susceptible		Susceptible		Susceptible	Susceptible	Susceptible	Susceptible	Susceptible	Susceptible		Susceptible	Susceptible		Susceptible		Susceptible		Susceptible	Susceptible	Susceptible	Susceptible		Susceptible	Susceptible GSS 1.5		Susceptible GSS 1.5		Susceptible GSS 1.5		Susceptible GSS 1.5	Susceptible GSS 1.5	Susceptible GSS 1	Susceptible GSS 1.5		Susceptible GSS 1.5
xab_138 187161_E35E_M36M_N37S_R41R_I62I_L63L_A71A_N83N_C95R	Susceptible	Susceptible	Susceptible	Susceptible	Susceptible			Susceptible		Susceptible	Susceptible	Susceptible	Susceptible		Susceptible		Susceptible	Susceptible	Susceptible	Susceptible	Susceptible	Susceptible		Susceptible	Susceptible		Susceptible		Susceptible		Susceptible	Susceptible	Susceptible	Susceptible		Susceptible	Susceptible GSS 1.5		Susceptible GSS 1.5		Susceptible GSS 1.5		Susceptible GSS 1.5	Susceptible GSS 1.5	Susceptible GSS 1	Susceptible GSS 1.5		Susceptible GSS 1.5
xab_139 187161_E35E_M36M_N37S_R41R_I62I_L63L_A71V_N83D_C95R	Susceptible	Susceptible	Susceptible	Susceptible	Susceptible			Susceptible		Susceptible	Susceptible	Susceptible	Susceptible		Susceptible		Susceptible	Susceptible	Susceptible	Susceptible	Susceptible	Susceptible		Susceptible	Susceptible		Potential Low-Level Resistance		Susceptible		Potential Low-Level Resistance	Susceptible	Low-Level Resistance	Potential Low-Level Resistance		Low-Level Resistance	Susceptible GSS 1.5		Susceptible GSS 1.5		Susceptible GSS 1.5		Susceptible GSS 1.5	Susceptible GSS 1.5	Susceptible GSS 1	Susceptible GSS 1.5		Susceptible GSS 1.5
xab_140 187161_E35E_M36M_N37S_R41R_I62I_L63P_A71A_N83D_C95C	Susceptible	Susceptible	Susceptible	Susceptible	Susceptible			Susceptible		Susceptible	Susceptible	Susceptible	Susceptible		Susceptible		Susceptible	Susceptible	Susceptible	Susceptible	Susceptible	Susceptible		Susceptible	Susceptible		Potential Low-Level Resistance		Susceptible		Potential Low-Level Resistance	Susceptible	Low-Level Resistance	Potential Low-Level Resistance		Low-Level Resistance	Susceptible GSS 1.5		Susceptible GSS 1.5		Susceptible GSS 1.5		Susceptible GSS 1.5	Susceptible GSS 1.5	Susceptible GSS 1	Susceptible GSS 1.5		Susceptible GSS 1.5
xab_141 187161_E35E_M36M_N37S_R41R_I62I_L63P_A71A_N83D_C95R	Susceptible	Susceptible	Susceptible	Susceptible	Susceptible			Susceptible		Susceptible	Susceptible	Susceptible	Susceptible		Susceptible		Susceptible	Susceptible	Susceptible	Susceptible	Susceptible	Susceptible		Susceptible	Susceptible		Potential Low-Level Resistance		Susceptible		Potential Low-Level Resistance	Susceptible	Low-Level Resistance	Potential Low-Level Resistance		Low-Level Resistance	Susceptible GSS 1.5		Susceptible GSS 1.5		Susceptible GSS 1.5		Susceptible GSS 1.5	Susceptible GSS 1.5	Susceptible GSS 1	Susceptible GSS 1.5		Susceptible GSS 1.5
xab_142 187161_E35E_M36M_N37S_R41R_I62I_L63P_A71A_N83N_C95C	Susceptible	Susceptible	Susceptible	Susceptible	Susceptible			Susceptible		Susceptible	Susceptible	Susceptible	Susceptible		Susceptible		Susceptible	Susceptible	Susceptible	Susceptible	Susceptible	Susceptible		Susceptible	Susceptible		Susceptible		Susceptible		Susceptible	Susceptible	Susceptible	Susceptible		Susceptible	Susceptible GSS 1.5		Susceptible GSS 1.5		Susceptible GSS 1.5		Susceptible GSS 1.5	Susceptible GSS 1.5	Susceptible GSS 1	Susceptible GSS 1.5		Susceptible GSS 1.5
xab_143 187161_E35E_M36M_N37S_R41R_I62I_L63P_A71A_N83N_C95R	Susceptible	Susceptible	Susceptible	Susceptible	Susceptible			Susceptible		Susceptible	Susceptible	Susceptible	Susceptible		Susceptible		Susceptible	Susceptible	Susceptible	Susceptible	Susceptible	Susceptible		Susceptible	Susceptible		Susceptible		Susceptible		Susceptible	Susceptible	Susceptible	Susceptible		Susceptible	Susceptible GSS 1.5		Susceptible GSS 1.5		Susceptible GSS 1.5		Susceptible GSS 1.5	Susceptible GSS 1.5	Susceptible GSS 1	Susceptible GSS 1.5		Susceptible GSS 1.5
xab_144 187161_E35E_M36M_N37S_R41R_I62L_L63L_A71A_N83D_C95C	Susceptible	Susceptible	Susceptible	Susceptible	Susceptible			Susceptible		Susceptible	Susceptible	Susceptible	Susceptible		Susceptible		Susceptible	Susceptible	Susceptible	Susceptible	Susceptible	Susceptible		Susceptible	Susceptible		Potential Low-Level Resistance		Susceptible		Potential Low-Level Resistance	Susceptible	Low-Level Resistance	Potential Low-Level Resistance		Low-Level Resistance	Susceptible GSS 1.5		Susceptible GSS 1.5		Susceptible GSS 1.5		Susceptible GSS 1.5	Susceptible GSS 1.5	Susceptible GSS 1	Susceptible GSS 1.5		Susceptible GSS 1.5
xab_145 187161_E35E_M36M_N37S_R41R_I62L_L63L_A71A_N83D_C95R	Susceptible	Susceptible	Susceptible	Susceptible	Susceptible			Susceptible		Susceptible	Susceptible	Susceptible	Susceptible		Susceptible		Susceptible	Susceptible	Susceptible	Susceptible	Susceptible	Susceptible		Susceptible	Susceptible		Potential Low-Level Resistance		Susceptible		Potential Low-Level Resistance	Susceptible	Low-Level Resistance	Potential Low-Level Resistance		Low-Level Resistance	Susceptible GSS 1.5		Susceptible GSS 1.5		Susceptible GSS 1.5		Susceptible GSS 1.5	Susceptible GSS 1.5	Susceptible GSS 1	Susceptible GSS 1.5		Susceptible GSS 1.5
xab_146 187161_E35E_M36M_N37S_R41R_I62L_L63L_A71A_N83N_C95C	Susceptible	Susceptible	Susceptible	Susceptible	Susceptible			Susceptible		Susceptible	Susceptible	Susceptible	Susceptible		Susceptible		Susceptible	Susceptible	Susceptible	Susceptible	Susceptible	Susceptible		Susceptible	Susceptible		Susceptible		Susceptible		Susceptible	Susceptible	Susceptible	Susceptible		Susceptible	Susceptible GSS 1.5		Susceptible GSS 1.5		Susceptible GSS 1.5		Susceptible GSS 1.5	Susceptible GSS 1.5	Susceptible GSS 1	Susceptible GSS 1.5		Susceptible GSS 1.5
xab_147 187161_E35E_M36M_N37S_R41R_I62L_L63L_A71A_N83N_C95R	Susceptible	Susceptible	Susceptible	Susceptible	Susceptible			Susceptible		Susceptible	Susceptible	Susceptible	Susceptible		Susceptible		Susceptible	Susceptible	Susceptible	Susceptible	Susceptible	Susceptible		Susceptible	Susceptible		Susceptible		Susceptible		Susceptible	Susceptible	Susceptible	Susceptible		Susceptible	Susceptible GSS 1.5		Susceptible GSS 1.5		Susceptible GSS 1.5		Susceptible GSS 1.5	Susceptible GSS 1.5	Susceptible GSS 1	Susceptible GSS 1.5		Susceptible GSS 1.5
xab_148 187161_E35E_M36M_N37S_R41R_I62L_L63L_A71V_N83D_C95C	Susceptible	Susceptible	Susceptible	Susceptible	Susceptible			Susceptible		Susceptible	Susceptible	Susceptible	Susceptible		Susceptible		Susceptible	Susceptible	Susceptible	Susceptible	Susceptible	Susceptible		Susceptible	Susceptible		Potential Low-Level Resistance		Susceptible		Potential Low-Level Resistance	Susceptible	Low-Level Resistance	Potential Low-Level Resistance		Low-Level Resistance	Susceptible GSS 1.5		Susceptible GSS 1.5		Susceptible GSS 1.5		Susceptible GSS 1.5	Susceptible GSS 1.5	Susceptible GSS 1	Susceptible GSS 1.5		Susceptible GSS 1.5
xab_149 187161_E35E_M36M_N37S_R41R_I62L_L63L_A71V_N83N_C95C	Susceptible	Susceptible	Susceptible	Susceptible	Susceptible			Susceptible		Susceptible	Susceptible	Susceptible	Susceptible		Susceptible		Susceptible	Susceptible	Susceptible	Susceptible	Susceptible	Susceptible		Susceptible	Susceptible		Susceptible		Susceptible		Susceptible	Susceptible	Susceptible	Susceptible		Susceptible	Susceptible GSS 1.5		Susceptible GSS 1.5		Susceptible GSS 1.5		Susceptible GSS 1.5	Susceptible GSS 1.5	Susceptible GSS 1	Susceptible GSS 1.5		Susceptible GSS 1.5
xab_150 187161_E35E_M36M_N37S_R41R_I62L_L63L_A71V_N83N_C95R	Susceptible	Susceptible	Susceptible	Susceptible	Susceptible			Susceptible		Susceptible	Susceptible	Susceptible	Susceptible		Susceptible		Susceptible	Susceptible	Susceptible	Susceptible	Susceptible	Susceptible		Susceptible	Susceptible		Susceptible		Susceptible		Susceptible	Susceptible	Susceptible	Susceptible		Susceptible	Susceptible GSS 1.5		Susceptible GSS 1.5		Susceptible GSS 1.5		Susceptible GSS 1.5	Susceptible GSS 1.5	Susceptible GSS 1	Susceptible GSS 1.5		Susceptible GSS 1.5
xab_151 187161_E35E_M36M_N37S_R41R_I62L_L63P_A71A_N83D_C95C	Susceptible	Susceptible	Susceptible	Susceptible	Susceptible			Susceptible		Susceptible	Susceptible	Susceptible	Susceptible		Susceptible		Susceptible	Susceptible	Susceptible	Susceptible	Susceptible	Susceptible		Susceptible	Susceptible		Potential Low-Level Resistance		Susceptible		Potential Low-Level Resistance	Susceptible	Low-Level Resistance	Potential Low-Level Resistance		Low-Level Resistance	Susceptible GSS 1.5		Susceptible GSS 1.5		Susceptible GSS 1.5		Susceptible GSS 1.5	Susceptible GSS 1.5	Susceptible GSS 1	Susceptible GSS 1.5		Susceptible GSS 1.5
xab_152 187161_E35E_M36M_N37S_R41R_I62L_L63P_A71A_N83D_C95R	Susceptible	Susceptible	Susceptible	Susceptible	Susceptible			Susceptible		Susceptible	Susceptible	Susceptible	Susceptible		Susceptible		Susceptible	Susceptible	Susceptible	Susceptible	Susceptible	Susceptible		Susceptible	Susceptible		Potential Low-Level Resistance		Susceptible		Potential Low-Level Resistance	Susceptible	Low-Level Resistance	Potential Low-Level Resistance		Low-Level Resistance	Susceptible GSS 1.5		Susceptible GSS 1.5		Susceptible GSS 1.5		Susceptible GSS 1.5	Susceptible GSS 1.5	Susceptible GSS 1	Susceptible GSS 1.5		Susceptible GSS 1.5
xab_153 187161_E35E_M36M_N37S_R41R_I62L_L63P_A71A_N83N_C95C	Susceptible	Susceptible	Susceptible	Susceptible	Susceptible			Susceptible		Susceptible	Susceptible	Susceptible	Susceptible		Susceptible		Susceptible	Susceptible	Susceptible	Susceptible	Susceptible	Susceptible		Susceptible	Susceptible		Susceptible		Susceptible		Susceptible	Susceptible	Susceptible	Susceptible		Susceptible	Susceptible GSS 1.5		Susceptible GSS 1.5		Susceptible GSS 1.5		Susceptible GSS 1.5	Susceptible GSS 1.5	Susceptible GSS 1	Susceptible GSS 1.5		Susceptible GSS 1.5
xab_154 187161_E35E_M36M_N37S_R41R_I62L_L63P_A71A_N83N_C95R	Susceptible	Susceptible	Susceptible	Susceptible	Susceptible			Susceptible		Susceptible	Susceptible	Susceptible	Susceptible		Susceptible		Susceptible	Susceptible	Susceptible	Susceptible	Susceptible	Susceptible		Susceptible	Susceptible		Susceptible		Susceptible		Susceptible	Susceptible	Susceptible	Susceptible		Susceptible	Susceptible GSS 1.5		Susceptible GSS 1.5		Susceptible GSS 1.5		Susceptible GSS 1.5	Susceptible GSS 1.5	Susceptible GSS 1	Susceptible GSS 1.5		Susceptible GSS 1.5
xab_155 187161_E35E_M36M_N37S_R41R_I62L_L63P_A71V_N83D_C95C	Susceptible	Susceptible	Susceptible	Susceptible	Susceptible			Susceptible		Susceptible	Susceptible	Susceptible	Susceptible		Susceptible		Susceptible	Susceptible	Susceptible	Susceptible	Susceptible	Susceptible		Susceptible	Susceptible		Potential Low-Level Resistance		Susceptible		Potential Low-Level Resistance	Susceptible	Low-Level Resistance	Potential Low-Level Resistance		Low-Level Resistance	Susceptible GSS 1.5		Susceptible GSS 1.5		Susceptible GSS 1.5		Susceptible GSS 1.5	Susceptible GSS 1.5	Susceptible GSS 1	Susceptible GSS 1.5		Susceptible GSS 1.5
xab_156 187161_E35E_M36M_N37S_R41R_I62L_L63P_A71V_N83D_C95R	Susceptible	Susceptible	Susceptible	Susceptible	Susceptible			Susceptible		Susceptible	Susceptible	Susceptible	Susceptible		Susceptible		Susceptible	Susceptible	Susceptible	Susceptible	Susceptible	Susceptible		Susceptible	Susceptible		Potential Low-Level Resistance		Susceptible		Potential Low-Level Resistance	Susceptible	Low-Level Resistance	Potential Low-Level Resistance		Low-Level Resistance	Susceptible GSS 1.5		Susceptible GSS 1.5		Susceptible GSS 1.5		Susceptible GSS 1.5	Susceptible GSS 1.5	Susceptible GSS 1	Susceptible GSS 1.5		Susceptible GSS 1.5
xab_157 187161_E35E_M36M_N37S_R41R_I62L_L63P_A71V_N83N_C95C	Susceptible	Susceptible	Susceptible	Susceptible	Susceptible			Susceptible		Susceptible	Susceptible	Susceptible	Susceptible		Susceptible		Susceptible	Susceptible	Susceptible	Susceptible	Susceptible	Susceptible		Susceptible	Susceptible		Susceptible		Susceptible		Susceptible	Susceptible	Susceptible	Susceptible		Susceptible	Susceptible GSS 1.5		Susceptible GSS 1.5		Susceptible GSS 1.5		Susceptible GSS 1.5	Susceptible GSS 1.5	Susceptible GSS 1	Susceptible GSS 1.5		Susceptible GSS 1.5
xab_158 187161_E35E_M36M_N37S_R41R_I62L_L63P_A71V_N83N_C95R	Susceptible	Susceptible	Susceptible	Susceptible	Susceptible			Susceptible		Susceptible	Susceptible	Susceptible	Susceptible		Susceptible		Susceptible	Susceptible	Susceptible	Susceptible	Susceptible	Susceptible		Susceptible	Susceptible		Susceptible		Susceptible		Susceptible	Susceptible	Susceptible	Susceptible		Susceptible	Susceptible GSS 1.5		Susceptible GSS 1.5		Susceptible GSS 1.5		Susceptible GSS 1.5	Susceptible GSS 1.5	Susceptible GSS 1	Susceptible GSS 1.5		Susceptible GSS 1.5
xab_159 187161_E35E_M36M_N37Y_R41K_I62I_L63L_A71A_N83D_C95C	Susceptible	Susceptible	Susceptible	Susceptible	Susceptible			Susceptible		Susceptible	Susceptible	Susceptible	Susceptible		Susceptible		Susceptible	Susceptible	Susceptible	Susceptible	Susceptible	Susceptible		Susceptible	Susceptible		Potential Low-Level Resistance		Susceptible		Potential Low-Level Resistance	Susceptible	Low-Level Resistance	Potential Low-Level Resistance		Low-Level Resistance	Susceptible GSS 1.5		Susceptible GSS 1.5		Susceptible GSS 1.5		Susceptible GSS 1.5	Susceptible GSS 1.5	Susceptible GSS 1	Susceptible GSS 1.5		Susceptible GSS 1.5
xab_160 187161_E35E_M36M_N37Y_R41K_I62I_L63L_A71A_N83D_C95R	Susceptible	Susceptible	Susceptible	Susceptible	Susceptible			Susceptible		Susceptible	Susceptible	Susceptible	Susceptible		Susceptible		Susceptible	Susceptible	Susceptible	Susceptible	Susceptible	Susceptible		Susceptible	Susceptible		Potential Low-Level Resistance		Susceptible		Potential Low-Level Resistance	Susceptible	Low-Level Resistance	Potential Low-Level Resistance		Low-Level Resistance	Susceptible GSS 1.5		Susceptible GSS 1.5		Susceptible GSS 1.5		Susceptible GSS 1.5	Susceptible GSS 1.5	Susceptible GSS 1	Susceptible GSS 1.5		Susceptible GSS 1.5
xab_161 187161_E35E_M36M_N37Y_R41K_I62I_L63L_A71A_N83N_C95C	Susceptible	Susceptible	Susceptible	Susceptible	Susceptible			Susceptible		Susceptible	Susceptible	Susceptible	Susceptible		Susceptible		Susceptible	Susceptible	Susceptible	Susceptible	Susceptible	Susceptible		Susceptible	Susceptible		Susceptible		Susceptible		Susceptible	Susceptible	Susceptible	Susceptible		Susceptible	Susceptible GSS 1.5		Susceptible GSS 1.5		Susceptible GSS 1.5		Susceptible GSS 1.5	Susceptible GSS 1.5	Susceptible GSS 1	Susceptible GSS 1.5		Susceptible GSS 1.5
xab_162 187161_E35E_M36M_N37Y_R41K_I62I_L63L_A71A_N83N_C95R	Susceptible	Susceptible	Susceptible	Susceptible	Susceptible			Susceptible		Susceptible	Susceptible	Susceptible	Susceptible		Susceptible		Susceptible	Susceptible	Susceptible	Susceptible	Susceptible	Susceptible		Susceptible	Susceptible		Susceptible		Susceptible		Susceptible	Susceptible	Susceptible	Susceptible		Susceptible	Susceptible GSS 1.5		Susceptible GSS 1.5		Susceptible GSS 1.5		Susceptible GSS 1.5	Susceptible GSS 1.5	Susceptible GSS 1	Susceptible GSS 1.5		Susceptible GSS 1.5
xab_163 187161_E35E_M36M_N37Y_R41K_I62I_L63P_A71A_N83D_C95C	Susceptible	Susceptible	Susceptible	Susceptible	Susceptible			Susceptible		Susceptible	Susceptible	Susceptible	Susceptible		Susceptible		Susceptible	Susceptible	Susceptible	Susceptible	Susceptible	Susceptible		Susceptible	Susceptible		Potential Low-Level Resistance		Susceptible		Potential Low-Level Resistance	Susceptible	Low-Level Resistance	Potential Low-Level Resistance		Low-Level Resistance	Susceptible GSS 1.5		Susceptible GSS 1.5		Susceptible GSS 1.5		Susceptible GSS 1.5	Susceptible GSS 1.5	Susceptible GSS 1	Susceptible GSS 1.5		Susceptible GSS 1.5
xab_164 187161_E35E_M36M_N37Y_R41K_I62I_L63P_A71A_N83D_C95R	Susceptible	Susceptible	Susceptible	Susceptible	Susceptible			Susceptible		Susceptible	Susceptible	Susceptible	Susceptible		Susceptible		Susceptible	Susceptible	Susceptible	Susceptible	Susceptible	Susceptible		Susceptible	Susceptible		Potential Low-Level Resistance		Susceptible		Potential Low-Level Resistance	Susceptible	Low-Level Resistance	Potential Low-Level Resistance		Low-Level Resistance	Susceptible GSS 1.5		Susceptible GSS 1.5		Susceptible GSS 1.5		Susceptible GSS 1.5	Susceptible GSS 1.5	Susceptible GSS 1	Susceptible GSS 1.5		Susceptible GSS 1.5
xab_165 187161_E35E_M36M_N37Y_R41K_I62I_L63P_A71A_N83N_C95C	Susceptible	Susceptible	Susceptible	Susceptible	Susceptible			Susceptible		Susceptible	Susceptible	Susceptible	Susceptible		Susceptible		Susceptible	Susceptible	Susceptible	Susceptible	Susceptible	Susceptible		Susceptible	Susceptible		Susceptible		Susceptible		Susceptible	Susceptible	Susceptible	Susceptible		Susceptible	Susceptible GSS 1.5		Susceptible GSS 1.5		Susceptible GSS 1.5		Susceptible GSS 1.5	Susceptible GSS 1.5	Susceptible GSS 1	Susceptible GSS 1.5		Susceptible GSS 1.5
xab_166 187161_E35E_M36M_N37Y_R41K_I62I_L63P_A71A_N83N_C95R	Susceptible	Susceptible	Susceptible	Susceptible	Susceptible			Susceptible		Susceptible	Susceptible	Susceptible	Susceptible		Susceptible		Susceptible	Susceptible	Susceptible	Susceptible	Susceptible	Susceptible		Susceptible	Susceptible		Susceptible		Susceptible		Susceptible	Susceptible	Susceptible	Susceptible		Susceptible	Susceptible GSS 1.5		Susceptible GSS 1.5		Susceptible GSS 1.5		Susceptible GSS 1.5	Susceptible GSS 1.5	Susceptible GSS 1	Susceptible GSS 1.5		Susceptible GSS 1.5
xab_167 187161_E35E_M36M_N37Y_R41K_I62L_L63L_A71A_N83D_C95C	Susceptible	Susceptible	Susceptible	Susceptible	Susceptible			Susceptible		Susceptible	Susceptible	Susceptible	Susceptible		Susceptible		Susceptible	Susceptible	Susceptible	Susceptible	Susceptible	Susceptible		Susceptible	Susceptible		Potential Low-Level Resistance		Susceptible		Potential Low-Level Resistance	Susceptible	Low-Level Resistance	Potential Low-Level Resistance		Low-Level Resistance	Susceptible GSS 1.5		Susceptible GSS 1.5		Susceptible GSS 1.5		Susceptible GSS 1.5	Susceptible GSS 1.5	Susceptible GSS 1	Susceptible GSS 1.5		Susceptible GSS 1.5
xab_168 187161_E35E_M36M_N37Y_R41K_I62L_L63L_A71A_N83D_C95R	Susceptible	Susceptible	Susceptible	Susceptible	Susceptible			Susceptible		Susceptible	Susceptible	Susceptible	Susceptible		Susceptible		Susceptible	Susceptible	Susceptible	Susceptible	Susceptible	Susceptible		Susceptible	Susceptible		Potential Low-Level Resistance		Susceptible		Potential Low-Level Resistance	Susceptible	Low-Level Resistance	Potential Low-Level Resistance		Low-Level Resistance	Susceptible GSS 1.5		Susceptible GSS 1.5		Susceptible GSS 1.5		Susceptible GSS 1.5	Susceptible GSS 1.5	Susceptible GSS 1	Susceptible GSS 1.5		Susceptible GSS 1.5
xab_169 187161_E35E_M36M_N37Y_R41K_I62L_L63L_A71A_N83N_C95C	Susceptible	Susceptible	Susceptible	Susceptible	Susceptible			Susceptible		Susceptible	Susceptible	Susceptible	Susceptible		Susceptible		Susceptible	Susceptible	Susceptible	Susceptible	Susceptible	Susceptible		Susceptible	Susceptible		Susceptible		Susceptible		Susceptible	Susceptible	Susceptible	Susceptible		Susceptible	Susceptible GSS 1.5		Susceptible GSS 1.5		Susceptible GSS 1.5		Susceptible GSS 1.5	Susceptible GSS 1.5	Susceptible GSS 1	Susceptible GSS 1.5		Susceptible GSS 1.5
xab_170 187161_E35E_M36M_N37Y_R41K_I62L_L63L_A71A_N83N_C95R	Susceptible	Susceptible	Susceptible	Susceptible	Susceptible			Susceptible		Susceptible	Susceptible	Susceptible	Susceptible		Susceptible		Susceptible	Susceptible	Susceptible	Susceptible	Susceptible	Susceptible		Susceptible	Susceptible		Susceptible		Susceptible		Susceptible	Susceptible	Susceptible	Susceptible		Susceptible	Susceptible GSS 1.5		Susceptible GSS 1.5		Susceptible GSS 1.5		Susceptible GSS 1.5	Susceptible GSS 1.5	Susceptible GSS 1	Susceptible GSS 1.5		Susceptible GSS 1.5
xab_171 187161_E35E_M36M_N37Y_R41K_I62L_L63L_A71V_N83D_C95C	Susceptible	Susceptible	Susceptible	Susceptible	Susceptible			Susceptible		Susceptible	Susceptible	Susceptible	Susceptible		Susceptible		Susceptible	Susceptible	Susceptible	Susceptible	Susceptible	Susceptible		Susceptible	Susceptible		Potential Low-Level Resistance		Susceptible		Potential Low-Level Resistance	Susceptible	Low-Level Resistance	Potential Low-Level Resistance		Low-Level Resistance	Susceptible GSS 1.5		Susceptible GSS 1.5		Susceptible GSS 1.5		Susceptible GSS 1.5	Susceptible GSS 1.5	Susceptible GSS 1	Susceptible GSS 1.5		Susceptible GSS 1.5
xab_172 187161_E35E_M36M_N37Y_R41K_I62L_L63L_A71V_N83N_C95C	Susceptible	Susceptible	Susceptible	Susceptible	Susceptible			Susceptible		Susceptible	Susceptible	Susceptible	Susceptible		Susceptible		Susceptible	Susceptible	Susceptible	Susceptible	Susceptible	Susceptible		Susceptible	Susceptible		Susceptible		Susceptible		Susceptible	Susceptible	Susceptible	Susceptible		Susceptible	Susceptible GSS 1.5		Susceptible GSS 1.5		Susceptible GSS 1.5		Susceptible GSS 1.5	Susceptible GSS 1.5	Susceptible GSS 1	Susceptible GSS 1.5		Susceptible GSS 1.5
xab_173 187161_E35E_M36M_N37Y_R41K_I62L_L63L_A71V_N83N_C95R	Susceptible	Susceptible	Susceptible	Susceptible	Susceptible			Susceptible		Susceptible	Susceptible	Susceptible	Susceptible		Susceptible		Susceptible	Susceptible	Susceptible	Susceptible	Susceptible	Susceptible		Susceptible	Susceptible		Susceptible		Susceptible		Susceptible	Susceptible	Susceptible	Susceptible		Susceptible	Susceptible GSS 1.5		Susceptible GSS 1.5		Susceptible GSS 1.5		Susceptible GSS 1.5	Susceptible GSS 1.5	Susceptible GSS 1	Susceptible GSS 1.5		Susceptible GSS 1.5
xab_174 187161_E35E_M36M_N37Y_R41K_I62L_L63P_A71A_N83D_C95C	Susceptible	Susceptible	Susceptible	Susceptible	Susceptible			Susceptible		Susceptible	Susceptible	Susceptible	Susceptible		Susceptible		Susceptible	Susceptible	Susceptible	Susceptible	Susceptible	Susceptible		Susceptible	Susceptible		Potential Low-Level Resistance		Susceptible		Potential Low-Level Resistance	Susceptible	Low-Level Resistance	Potential Low-Level Resistance		Low-Level Resistance	Susceptible GSS 1.5		Susceptible GSS 1.5		Susceptible GSS 1.5		Susceptible GSS 1.5	Susceptible GSS 1.5	Susceptible GSS 1	Susceptible GSS 1.5		Susceptible GSS 1.5
xab_175 187161_E35E_M36M_N37Y_R41K_I62L_L63P_A71A_N83D_C95R	Susceptible	Susceptible	Susceptible	Susceptible	Susceptible			Susceptible		Susceptible	Susceptible	Susceptible	Susceptible		Susceptible		Susceptible	Susceptible	Susceptible	Susceptible	Susceptible	Susceptible		Susceptible	Susceptible		Potential Low-Level Resistance		Susceptible		Potential Low-Level Resistance	Susceptible	Low-Level Resistance	Potential Low-Level Resistance		Low-Level Resistance	Susceptible GSS 1.5		Susceptible GSS 1.5		Susceptible GSS 1.5		Susceptible GSS 1.5	Susceptible GSS 1.5	Susceptible GSS 1	Susceptible GSS 1.5		Susceptible GSS 1.5
xab_176 187161_E35E_M36M_N37Y_R41K_I62L_L63P_A71A_N83N_C95C	Susceptible	Susceptible	Susceptible	Susceptible	Susceptible			Susceptible		Susceptible	Susceptible	Susceptible	Susceptible		Susceptible		Susceptible	Susceptible	Susceptible	Susceptible	Susceptible	Susceptible		Susceptible	Susceptible		Susceptible		Susceptible		Susceptible	Susceptible	Susceptible	Susceptible		Susceptible	Susceptible GSS 1.5		Susceptible GSS 1.5		Susceptible GSS 1.5		Susceptible GSS 1.5	Susceptible GSS 1.5	Susceptible GSS 1	Susceptible GSS 1.5		Susceptible GSS 1.5
xab_177 187161_E35E_M36M_N37Y_R41K_I62L_L63P_A71A_N83N_C95R	Susceptible	Susceptible	Susceptible	Susceptible	Susceptible			Susceptible		Susceptible	Susceptible	Susceptible	Susceptible		Susceptible		Susceptible	Susceptible	Susceptible	Susceptible	Susceptible	Susceptible		Susceptible	Susceptible		Susceptible		Susceptible		Susceptible	Susceptible	Susceptible	Susceptible		Susceptible	Susceptible GSS 1.5		Susceptible GSS 1.5		Susceptible GSS 1.5		Susceptible GSS 1.5	Susceptible GSS 1.5	Susceptible GSS 1	Susceptible GSS 1.5		Susceptible GSS 1.5
xab_178 187161_E35E_M36M_N37Y_R41K_I62L_L63P_A71V_N83D_C95C	Susceptible	Susceptible	Susceptible	Susceptible	Susceptible			Susceptible		Susceptible	Susceptible	Susceptible	Susceptible		Susceptible		Susceptible	Susceptible	Susceptible	Susceptible	Susceptible	Susceptible		Susceptible	Susceptible		Potential Low-Level Resistance		Susceptible		Potential Low-Level Resistance	Susceptible	Low-Level Resistance	Potential Low-Level Resistance		Low-Level Resistance	Susceptible GSS 1.5		Susceptible GSS 1.5		Susceptible GSS 1.5		Susceptible GSS 1.5	Susceptible GSS 1.5	Susceptible GSS 1	Susceptible GSS 1.5		Susceptible GSS 1.5
xab_179 187161_E35E_M36M_N37Y_R41K_I62L_L63P_A71V_N83D_C95R	Susceptible	Susceptible	Susceptible	Susceptible	Susceptible			Susceptible		Susceptible	Susceptible	Susceptible	Susceptible		Susceptible		Susceptible	Susceptible	Susceptible	Susceptible	Susceptible	Susceptible		Susceptible	Susceptible		Potential Low-Level Resistance		Susceptible		Potential Low-Level Resistance	Susceptible	Low-Level Resistance	Potential Low-Level Resistance		Low-Level Resistance	Susceptible GSS 1.5		Susceptible GSS 1.5		Susceptible GSS 1.5		Susceptible GSS 1.5	Susceptible GSS 1.5	Susceptible GSS 1	Susceptible GSS 1.5		Susceptible GSS 1.5
xab_180 187161_E35E_M36M_N37Y_R41K_I62L_L63P_A71V_N83N_C95C	Susceptible	Susceptible	Susceptible	Susceptible	Susceptible			Susceptible		Susceptible	Susceptible	Susceptible	Susceptible		Susceptible		Susceptible	Susceptible	Susceptible	Susceptible	Susceptible	Susceptible		Susceptible	Susceptible		Susceptible		Susceptible		Susceptible	Susceptible	Susceptible	Susceptible		Susceptible	Susceptible GSS 1.5		Susceptible GSS 1.5		Susceptible GSS 1.5		Susceptible GSS 1.5	Susceptible GSS 1.5	Susceptible GSS 1	Susceptible GSS 1.5		Susceptible GSS 1.5
xab_181 187161_E35E_M36M_N37Y_R41K_I62L_L63P_A71V_N83N_C95R	Susceptible	Susceptible	Susceptible	Susceptible	Susceptible			Susceptible		Susceptible	Susceptible	Susceptible	Susceptible		Susceptible		Susceptible	Susceptible	Susceptible	Susceptible	Susceptible	Susceptible		Susceptible	Susceptible		Susceptible		Susceptible		Susceptible	Susceptible	Susceptible	Susceptible		Susceptible	Susceptible GSS 1.5		Susceptible GSS 1.5		Susceptible GSS 1.5		Susceptible GSS 1.5	Susceptible GSS 1.5	Susceptible GSS 1	Susceptible GSS 1.5		Susceptible GSS 1.5
xab_182 187161_E35E_M36M_N37Y_R41R_I62I_L63L_A71A_N83D_C95C	Susceptible	Susceptible	Susceptible	Susceptible	Susceptible			Susceptible		Susceptible	Susceptible	Susceptible	Susceptible		Susceptible		Susceptible	Susceptible	Susceptible	Susceptible	Susceptible	Susceptible		Susceptible	Susceptible		Potential Low-Level Resistance		Susceptible		Potential Low-Level Resistance	Susceptible	Low-Level Resistance	Potential Low-Level Resistance		Low-Level Resistance	Susceptible GSS 1.5		Susceptible GSS 1.5		Susceptible GSS 1.5		Susceptible GSS 1.5	Susceptible GSS 1.5	Susceptible GSS 1	Susceptible GSS 1.5		Susceptible GSS 1.5
xab_183 187161_E35E_M36M_N37Y_R41R_I62I_L63L_A71A_N83D_C95R	Susceptible	Susceptible	Susceptible	Susceptible	Susceptible			Susceptible		Susceptible	Susceptible	Susceptible	Susceptible		Susceptible		Susceptible	Susceptible	Susceptible	Susceptible	Susceptible	Susceptible		Susceptible	Susceptible		Potential Low-Level Resistance		Susceptible		Potential Low-Level Resistance	Susceptible	Low-Level Resistance	Potential Low-Level Resistance		Low-Level Resistance	Susceptible GSS 1.5		Susceptible GSS 1.5		Susceptible GSS 1.5		Susceptible GSS 1.5	Susceptible GSS 1.5	Susceptible GSS 1	Susceptible GSS 1.5		Susceptible GSS 1.5
xab_184 187161_E35E_M36M_N37Y_R41R_I62I_L63L_A71A_N83N_C95C	Susceptible	Susceptible	Susceptible	Susceptible	Susceptible			Susceptible		Susceptible	Susceptible	Susceptible	Susceptible		Susceptible		Susceptible	Susceptible	Susceptible	Susceptible	Susceptible	Susceptible		Susceptible	Susceptible		Susceptible		Susceptible		Susceptible	Susceptible	Susceptible	Susceptible		Susceptible	Susceptible GSS 1.5		Susceptible GSS 1.5		Susceptible GSS 1.5		Susceptible GSS 1.5	Susceptible GSS 1.5	Susceptible GSS 1	Susceptible GSS 1.5		Susceptible GSS 1.5
xab_185 187161_E35E_M36M_N37Y_R41R_I62I_L63L_A71A_N83N_C95R	Susceptible	Susceptible	Susceptible	Susceptible	Susceptible			Susceptible		Susceptible	Susceptible	Susceptible	Susceptible		Susceptible		Susceptible	Susceptible	Susceptible	Susceptible	Susceptible	Susceptible		Susceptible	Susceptible		Susceptible		Susceptible		Susceptible	Susceptible	Susceptible	Susceptible		Susceptible	Susceptible GSS 1.5		Susceptible GSS 1.5		Susceptible GSS 1.5		Susceptible GSS 1.5	Susceptible GSS 1.5	Susceptible GSS 1	Susceptible GSS 1.5		Susceptible GSS 1.5
xab_186 187161_E35E_M36M_N37Y_R41R_I62I_L63L_A71V_N83D_C95C	Susceptible	Susceptible	Susceptible	Susceptible	Susceptible			Susceptible		Susceptible	Susceptible	Susceptible	Susceptible		Susceptible		Susceptible	Susceptible	Susceptible	Susceptible	Susceptible	Susceptible		Susceptible	Susceptible		Potential Low-Level Resistance		Susceptible		Potential Low-Level Resistance	Susceptible	Low-Level Resistance	Potential Low-Level Resistance		Low-Level Resistance	Susceptible GSS 1.5		Susceptible GSS 1.5		Susceptible GSS 1.5		Susceptible GSS 1.5	Susceptible GSS 1.5	Susceptible GSS 1	Susceptible GSS 1.5		Susceptible GSS 1.5
xab_187 187161_E35E_M36M_N37Y_R41R_I62I_L63L_A71V_N83D_C95R	Susceptible	Susceptible	Susceptible	Susceptible	Susceptible			Susceptible		Susceptible	Susceptible	Susceptible	Susceptible		Susceptible		Susceptible	Susceptible	Susceptible	Susceptible	Susceptible	Susceptible		Susceptible	Susceptible		Potential Low-Level Resistance		Susceptible		Potential Low-Level Resistance	Susceptible	Low-Level Resistance	Potential Low-Level Resistance		Low-Level Resistance	Susceptible GSS 1.5		Susceptible GSS 1.5		Susceptible GSS 1.5		Susceptible GSS 1.5	Susceptible GSS 1.5	Susceptible GSS 1	Susceptible GSS 1.5		Susceptible GSS 1.5
xab_188 187161_E35E_M36M_N37Y_R41R_I62I_L63L_A71V_N83N_C95C	Susceptible	Susceptible	Susceptible	Susceptible	Susceptible			Susceptible		Susceptible	Susceptible	Susceptible	Susceptible		Susceptible		Susceptible	Susceptible	Susceptible	Susceptible	Susceptible	Susceptible		Susceptible	Susceptible		Susceptible		Susceptible		Susceptible	Susceptible	Susceptible	Susceptible		Susceptible	Susceptible GSS 1.5		Susceptible GSS 1.5		Susceptible GSS 1.5		Susceptible GSS 1.5	Susceptible GSS 1.5	Susceptible GSS 1	Susceptible GSS 1.5		Susceptible GSS 1.5
xab_189 187161_E35E_M36M_N37Y_R41R_I62I_L63L_A71V_N83N_C95R	Susceptible	Susceptible	Susceptible	Susceptible	Susceptible			Susceptible		Susceptible	Susceptible	Susceptible	Susceptible		Susceptible		Susceptible	Susceptible	Susceptible	Susceptible	Susceptible	Susceptible		Susceptible	Susceptible		Susceptible		Susceptible		Susceptible	Susceptible	Susceptible	Susceptible		Susceptible	Susceptible GSS 1.5		Susceptible GSS 1.5		Susceptible GSS 1.5		Susceptible GSS 1.5	Susceptible GSS 1.5	Susceptible GSS 1	Susceptible GSS 1.5		Susceptible GSS 1.5
xab_190 187161_E35E_M36M_N37Y_R41R_I62I_L63P_A71A_N83D_C95C	Susceptible	Susceptible	Susceptible	Susceptible	Susceptible			Susceptible		Susceptible	Susceptible	Susceptible	Susceptible		Susceptible		Susceptible	Susceptible	Susceptible	Susceptible	Susceptible	Susceptible		Susceptible	Susceptible		Potential Low-Level Resistance		Susceptible		Potential Low-Level Resistance	Susceptible	Low-Level Resistance	Potential Low-Level Resistance		Low-Level Resistance	Susceptible GSS 1.5		Susceptible GSS 1.5		Susceptible GSS 1.5		Susceptible GSS 1.5	Susceptible GSS 1.5	Susceptible GSS 1	Susceptible GSS 1.5		Susceptible GSS 1.5
xab_191 187161_E35E_M36M_N37Y_R41R_I62I_L63P_A71A_N83D_C95R	Susceptible	Susceptible	Susceptible	Susceptible	Susceptible			Susceptible		Susceptible	Susceptible	Susceptible	Susceptible		Susceptible		Susceptible	Susceptible	Susceptible	Susceptible	Susceptible	Susceptible		Susceptible	Susceptible		Potential Low-Level Resistance		Susceptible		Potential Low-Level Resistance	Susceptible	Low-Level Resistance	Potential Low-Level Resistance		Low-Level Resistance	Susceptible GSS 1.5		Susceptible GSS 1.5		Susceptible GSS 1.5		Susceptible GSS 1.5	Susceptible GSS 1.5	Susceptible GSS 1	Susceptible GSS 1.5		Susceptible GSS 1.5
xab_192 187161_E35E_M36M_N37Y_R41R_I62I_L63P_A71A_N83N_C95C	Susceptible	Susceptible	Susceptible	Susceptible	Susceptible			Susceptible		Susceptible	Susceptible	Susceptible	Susceptible		Susceptible		Susceptible	Susceptible	Susceptible	Susceptible	Susceptible	Susceptible		Susceptible	Susceptible		Susceptible		Susceptible		Susceptible	Susceptible	Susceptible	Susceptible		Susceptible	Susceptible GSS 1.5		Susceptible GSS 1.5		Susceptible GSS 1.5		Susceptible GSS 1.5	Susceptible GSS 1.5	Susceptible GSS 1	Susceptible GSS 1.5		Susceptible GSS 1.5
xab_193 187161_E35E_M36M_N37Y_R41R_I62I_L63P_A71A_N83N_C95R	Susceptible	Susceptible	Susceptible	Susceptible	Susceptible			Susceptible		Susceptible	Susceptible	Susceptible	Susceptible		Susceptible		Susceptible	Susceptible	Susceptible	Susceptible	Susceptible	Susceptible		Susceptible	Susceptible		Susceptible		Susceptible		Susceptible	Susceptible	Susceptible	Susceptible		Susceptible	Susceptible GSS 1.5		Susceptible GSS 1.5		Susceptible GSS 1.5		Susceptible GSS 1.5	Susceptible GSS 1.5	Susceptible GSS 1	Susceptible GSS 1.5		Susceptible GSS 1.5
xab_194 187161_E35E_M36M_N37Y_R41R_I62I_L63P_A71V_N83D_C95R	Susceptible	Susceptible	Susceptible	Susceptible	Susceptible			Susceptible		Susceptible	Susceptible	Susceptible	Susceptible		Susceptible		Susceptible	Susceptible	Susceptible	Susceptible	Susceptible	Susceptible		Susceptible	Susceptible		Potential Low-Level Resistance		Susceptible		Potential Low-Level Resistance	Susceptible	Low-Level Resistance	Potential Low-Level Resistance		Low-Level Resistance	Susceptible GSS 1.5		Susceptible GSS 1.5		Susceptible GSS 1.5		Susceptible GSS 1.5	Susceptible GSS 1.5	Susceptible GSS 1	Susceptible GSS 1.5		Susceptible GSS 1.5
xab_195 187161_E35E_M36M_N37Y_R41R_I62I_L63P_A71V_N83N_C95C	Susceptible	Susceptible	Susceptible	Susceptible	Susceptible			Susceptible		Susceptible	Susceptible	Susceptible	Susceptible		Susceptible		Susceptible	Susceptible	Susceptible	Susceptible	Susceptible	Susceptible		Susceptible	Susceptible		Susceptible		Susceptible		Susceptible	Susceptible	Susceptible	Susceptible		Susceptible	Susceptible GSS 1.5		Susceptible GSS 1.5		Susceptible GSS 1.5		Susceptible GSS 1.5	Susceptible GSS 1.5	Susceptible GSS 1	Susceptible GSS 1.5		Susceptible GSS 1.5
xab_196 187161_E35E_M36M_N37Y_R41R_I62I_L63P_A71V_N83N_C95R	Susceptible	Susceptible	Susceptible	Susceptible	Susceptible			Susceptible		Susceptible	Susceptible	Susceptible	Susceptible		Susceptible		Susceptible	Susceptible	Susceptible	Susceptible	Susceptible	Susceptible		Susceptible	Susceptible		Susceptible		Susceptible		Susceptible	Susceptible	Susceptible	Susceptible		Susceptible	Susceptible GSS 1.5		Susceptible GSS 1.5		Susceptible GSS 1.5		Susceptible GSS 1.5	Susceptible GSS 1.5	Susceptible GSS 1	Susceptible GSS 1.5		Susceptible GSS 1.5
xab_197 187161_E35E_M36M_N37Y_R41R_I62L_L63L_A71A_N83D_C95C	Susceptible	Susceptible	Susceptible	Susceptible	Susceptible			Susceptible		Susceptible	Susceptible	Susceptible	Susceptible		Susceptible		Susceptible	Susceptible	Susceptible	Susceptible	Susceptible	Susceptible		Susceptible	Susceptible		Potential Low-Level Resistance		Susceptible		Potential Low-Level Resistance	Susceptible	Low-Level Resistance	Potential Low-Level Resistance		Low-Level Resistance	Susceptible GSS 1.5		Susceptible GSS 1.5		Susceptible GSS 1.5		Susceptible GSS 1.5	Susceptible GSS 1.5	Susceptible GSS 1	Susceptible GSS 1.5		Susceptible GSS 1.5
xab_198 187161_E35E_M36M_N37Y_R41R_I62L_L63L_A71A_N83D_C95R	Susceptible	Susceptible	Susceptible	Susceptible	Susceptible			Susceptible		Susceptible	Susceptible	Susceptible	Susceptible		Susceptible		Susceptible	Susceptible	Susceptible	Susceptible	Susceptible	Susceptible		Susceptible	Susceptible		Potential Low-Level Resistance		Susceptible		Potential Low-Level Resistance	Susceptible	Low-Level Resistance	Potential Low-Level Resistance		Low-Level Resistance	Susceptible GSS 1.5		Susceptible GSS 1.5		Susceptible GSS 1.5		Susceptible GSS 1.5	Susceptible GSS 1.5	Susceptible GSS 1	Susceptible GSS 1.5		Susceptible GSS 1.5
xab_199 187161_E35E_M36M_N37Y_R41R_I62L_L63L_A71A_N83N_C95C	Susceptible	Susceptible	Susceptible	Susceptible	Susceptible			Susceptible		Susceptible	Susceptible	Susceptible	Susceptible		Susceptible		Susceptible	Susceptible	Susceptible	Susceptible	Susceptible	Susceptible		Susceptible	Susceptible		Susceptible		Susceptible		Susceptible	Susceptible	Susceptible	Susceptible		Susceptible	Susceptible GSS 1.5		Susceptible GSS 1.5		Susceptible GSS 1.5		Susceptible GSS 1.5	Susceptible GSS 1.5	Susceptible GSS 1	Susceptible GSS 1.5		Susceptible GSS 1.5
[truncated: 5,570 more rows]

## Sheet: Resistant_noOut
Sequence_Name	GRADE_APV/FPV_RTV	GRADE_ATV	GRADE_ATV_RTV	GRADE_ATV_SP	GRADE_DRV	GRADE_DRV_QD	GRADE_IDV_RTV	GRADE_LPV	GRADE_NFV	GRADE_SQV_RTV	GRADE_SQV_SP	GRADE_TPV	ANRS_APV/FPV_RTV	ANRS_ATV	ANRS_ATV_RTV	ANRS_ATV_SP	ANRS_DRV	ANRS_DRV_QD	ANRS_IDV_RTV	ANRS_LPV	ANRS_NFV	ANRS_SQV_RTV	ANRS_SQV_SP	ANRS_TPV	HIVDB_APV/FPV_RTV	HIVDB_ATV	HIVDB_ATV_RTV	HIVDB_ATV_SP	HIVDB_DRV	HIVDB_DRV_QD	HIVDB_IDV_RTV	HIVDB_LPV	HIVDB_NFV	HIVDB_SQV_RTV	HIVDB_SQV_SP	HIVDB_TPV	Rega_APV/FPV_RTV	Rega_ATV	Rega_ATV_RTV	Rega_ATV_SP	Rega_DRV	Rega_DRV_QD	Rega_IDV_RTV	Rega_LPV	Rega_NFV	Rega_SQV_RTV	Rega_SQV_SP	Rega_TPV
[truncated: 680 more rows]
